# Supplementary material
Source: MDPI journal article supplement (https://www.mdpi.com/2079-9292/12/16/3505)
Supplement: s1 [file s1]

## Mount drive to allow for large files to be read

In [2]:

```
from google.colab import drive
drive.mount('/content/drive')
```

Mounted at /content/drive

## Import required libraries for entire notebook

In [3]:

```
import pandas as pd
import numpy as np
import math
import tensorflow
import matplotlib.pyplot as plt
import tensorflow.keras

from tensorflow.keras.models import Sequential, Model
from tensorflow.keras.layers import Dense, Input, concatenate, Dropout, Conv2D, LSTM, Bidirectional, Flatten, Conv1D, GlobalMaxPooling1D, MaxPooling1D, Activation, BatchNormalization, MaxPooling2D, Flatten
from tensorflow.keras import initializers
from tensorflow.keras.regularizers import l1
from tensorflow.keras.optimizers import Adam

from sklearn import preprocessing
from sklearn.model_selection import train_test_split
from sklearn.utils import shuffle
from sklearn import decomposition

from sklearn.metrics import mean_absolute_error, mean_squared_error
```

## Set random seed for reproducibility

In [4]:

```
tensorflow.random.set_seed(0)
np.random.seed(0)
```

## Load and format data

The data is read in and split into sets depending on the number of antenna the data was generated from. This is then flattened and pre processed ready for any required dimensionality reduction.

In [5]:

```
def load_data(phase, magnitude, output_data, antenna_num):

    magnitude_data = []
    phase_data = []
    num_signals = int(magnitude.shape[0]/100)

    for i in range(num_signals):
        magnitude_data.append(magnitude[i*99:i*99+100, 0:antenna_num*antenna_num].flatten())
        phase_data.append(phase[i*99:i*99+100, 0:antenna_num*antenna_num].flatten())

    magnitude_data = np.asarray(magnitude_data).astype(np.float32)
    magnitude_data = preprocessing.MinMaxScaler().fit_transform(magnitude_data)
    phase_data = np.asarray(phase_data)
    phase_data = preprocessing.MinMaxScaler().fit_transform(phase_data)
    output_data = np.asarray(output_data).astype(np.float32)

    return [phase_data, magnitude_data, output_data]
```

In [6]:

```
def load_data_cnn(phase, magnitude, output_data, antenna_num):

    magnitude_data = []
    phase_data = []
    num_signals = int(magnitude.shape[0]/100)

    for i in range(num_signals):
        magnitude_data.append(magnitude[i*99:i*99+100, 0:antenna_num*antenna_num])
        phase_data.append(phase[i*99:i*99+100, 0:antenna_num*antenna_num])
        magnitude_data[i] = np.asarray(magnitude_data[i]).astype(np.float32)
        magnitude_data[i] = preprocessing.MinMaxScaler().fit_transform(magnitude_data[i])
        phase_data[i] = np.asarray(phase_data[i]).astype(np.float32)
        phase_data[i] = preprocessing.MinMaxScaler().fit_transform(phase_data[i])

    magnitude_data = np.asarray(magnitude_data).astype(np.float32)
    phase_data = np.asarray(phase_data).astype(np.float32)
    output_data = np.asarray(output_data).astype(np.float32)

    return [phase_data, magnitude_data, output_data]
```

## Perform dimensionality reduction

Dimensionality reduction may be required depending on the size of the data before learning can be performed. The method below reduces the set to be 10 times smaller through principle component analysis.

In [7]:

```
def perform_dimensionality_reduction(phase_data, magnitude_data):

    n = int(phase_data.shape[1]/10)
    pca = decomposition.PCA(n_components=n)
    pca.fit(magnitude_data)
    magnitude_data = pca.transform(magnitude_data)
    pca.fit(phase_data)
    phase_data = pca.transform(phase_data)

    return [phase_data, magnitude_data]
```

## Split into test and train

The data must be shuffled so that a balanced set of data is provided to both the test and train sets. Then data set must be split into test and train sets with the specific split specified.

In [8]:

```
def split_test_train(phase_data, magnitude_data, output_data, split):

    magnitude_data, phase_data, output_data = shuffle(magnitude_data, phase_data, output_data, random_state=0)
    x_train_magnitude, x_test_magnitude, x_train_phase, x_test_phase, y_train, y_test = train_test_split(magnitude_data, phase_data, output_data, test_size=split, random_state=0)

    return [x_train_magnitude, x_test_magnitude, x_train_phase, x_test_phase, y_train, y_test]
```

## Create MLP

Parameterised creation of the multi-layer perceptron. Allows for different input shapes, specification of number of layers and number of neurons per layer, whether to complete the regression in this model or to leave it open for combination and allows for the specification of activation function.

In [9]:

```
def create_mlp(input_shape, layers, regress, activation_f):

    inputA = Input(shape=input_shape)

    for (i, f) in enumerate(layers):
        if i == 0:
            x = Dense(f, activation=activation_f)(inputA)
        else:
            x = Dense(f, activation=activation_f)(x)
            x = Dropout(0.3)(x)

    if regress:
        x = Dense(2, activation="linear")(x)

    return Model(inputs=inputA, outputs=x)
```

## Create 1-D CNN

Parameterised creation of the one dimensional convolutional neural network. Allows for different input shapes, specification of number of layers and number of neurons per layer, whether to complete the regression in this model or to leave it open for combination and allows for the specification of activation function.

In [10]:

```
def create_1d_cnn(input_shape, regression, filters, layers, activation_f):

    inputA = Input(shape=input_shape)
    init_he_u = initializers.he_uniform(seed=None)
    Dim = 1

    for (i, f) in enumerate(filters):
        if i == 0:
            x = Conv1D(filters=f, kernel_size=3, activation=activation_f)(inputA)
            # x = BatchNormalization(axis=Dim)(x)
        else:
            x = Conv1D(filters=f, kernel_size=3, activation=activation_f)(x)
            # x = BatchNormalization(axis=Dim)(x)

    x = Dropout(0.5)(x)
    x = MaxPooling1D(pool_size=2)(x)
    x = Flatten()(x)

    for (i, f) in enumerate(layers):
        x = Dense(f, activation=activation_f)(x)
        # x = Dropout(0.3)(x)

    if regression:
        x = Dense(2, activation="linear")(x)

    x = Model(inputs=inputA, outputs=x)

    return x
```

## Create 2-D CNN

Parameterised creation of the two dimensional convolutional neural network. Allows for different input shapes, specification of number of layers and number of neurons per layer, whether to complete the regression in this model or to leave it open for combination and allows for the specification of activation function.

In [11]:

```
def create_2d_cnn(height, width, depth, filters, regress, activation_f):  
  
    inputShape = (height, width, depth)  
    Dim = -1  
    # define the model input  
    inputs = Input(shape=inputShape)  
    # loop over the number of filters  
    for (i, f) in enumerate(filters):  
        if i == 0:  
            x = inputs  
            x = Conv2D(f, (3, 3), padding="same")(x)  
            x = Activation(activation_f)(x)  
            x = Dropout(0.25)(x)  
            x = BatchNormalization(axis=Dim)(x)  
            x = MaxPooling2D(pool_size=(1, 1))(x)  
  
        x = Flatten()(x)  
        x = Dense(16)(x)  
        x = Activation(activation_f)(x)  
        x = BatchNormalization(axis=Dim)(x)  
        x = Dropout(0.25)(x)  
        x = Dense(4)(x)  
        x = Activation(activation_f)(x)  
    if regress:  
        x = Dense(2, activation="linear")(x)  
    model = Model(inputs, x)  
  
    return model
```

## Create LSTM - UNUSED

This method did not produce desirable results so has not been considered in the evaluation of the results.

In [12]:

```
def create_LSTM(input_shape, lstm_layers, layers, regression, activation_f):

    inputA = Input(shape=input_shape)
    init_he_u = initializers.he_uniform(seed=None)

    for (i, f) in enumerate(lstm_layers):
        if i == 0:
            x = Bidirectional(LSTM(f, activation=activation_f, return_sequences=True))(input
A)
        else:
            x = Bidirectional(LSTM(f, activation=activation_f))(x)
    x = Dropout(0.5)(x)
    x = Flatten()(x)

    for (i, f) in enumerate(layers):
        x = Dense(f, activation=activation_f)(x)
        x = Dropout(0.3)(x)

    if regression:
        x = Dense(2, activation="linear")(x)

    return Model(inputs=inputA, outputs=x)
```

## Combine models

Take 2 artificial neural networks and combine them. This combination then flows into fully connected layers and the regression is completed with linear activation function

In [13]:

```
def combine_models(phase, magnitude, layers):

    combined = concatenate([magnitude.output, phase.output])

    for (i, f) in enumerate(layers):
        if i == 0:
            x = Dense(f, activation="relu")(combined)
        else:
            x = Dense(f, activation="relu")(x)
        # x = Dropout(0.3)(x)

    x = Dense(2, activation="linear")(x)

    return Model(inputs=[magnitude.input, phase.input], outputs=x)
```

## Display graphs

Displays the graphs of Mean square error and mean absolute error to demonstrate the learning process across epochs.

In [14]:

```
def display_graphs(history):

    plt.plot(history.history['mse'])
    plt.plot(history.history['val_mse'])
    plt.title('Model accuracy mse')
    plt.ylabel('Accuracy')
    plt.xlabel('Epoch')
    plt.legend(['Train', 'Test'], loc='upper left')
    plt.show()

    plt.plot(history.history['mae'])
    plt.plot(history.history['val_mae'])
    plt.title('Model accuracy mae')
    plt.ylabel('Accuracy')
    plt.xlabel('Epoch')
    plt.legend(['Train', 'Test'], loc='upper left')
    plt.show()
```

## Calculate MUSIC metrics

Calculate the mean square error and mean absolute error of the original MUSIC algorithm's direction of arrival estimations for comparison with the best model achieved.

In [15]:

```
def MUSIC_metrics(output_data):

    cleaned_data = []
    nan_index = []

    for i in range(len(output_data)):

        if math.isnan(output_data[i][3]) == False:
            cleaned_data.append(output_data[i])
        else:
            nan_index.append(i)

    cleaned_data = np.asarray(cleaned_data).astype(np.float32)
    prediction = cleaned_data[:,2:4]
    actual = cleaned_data[:,0:2]

    return [mean_absolute_error(actual, prediction), mean_squared_error(actual, prediction), nan_index]
```

# Test the approaches

The approaches above will be tested as follows:

- Perform each of the major approaches (MLP, 1D-CNN, 2D-CNN) on magnitude and phase and the combine them into a regression
- Perform each of the major approaches separately against phase and magnitude

This will be performed against the data from the 2-by-2 antenna array, this data again with PCA performed on it and on data from the 8-by-8 antenna array with PCA performed on it.

## 2-by-2 antenna array

In [ ]:

```
antenna_num = 2

magnitude = pd.read_csv('/content/drive/MyDrive/train_magnitude.csv', header=None).to_numpy()
output_data = pd.read_csv('/content/drive/MyDrive/train_outputs.csv', header=None).to_numpy()
phase = pd.read_csv('/content/drive/MyDrive/train_phase.csv', header=None).to_numpy()

data = load_data(phase, magnitude, output_data, antenna_num)
phase_data = data[0]
magnitude_data = data[1]
output_data = data[2]

output_data

data_split = split_test_train(phase_data, magnitude_data, output_data, 0.4)
x_train_magnitude = data_split[0]
x_test_magnitude = data_split[1]
x_train_phase = data_split[2]
x_test_phase = data_split[3]
y_train = data_split[4][:,0:2]
y_test = data_split[5][:,0:2]

lr = 0.001
epochs = 100
opt = Adam(learning_rate=lr)
```



In [ ]:

```
print("Combined phase and magnitude MLP")

layers = (400, 200)
shape = (400,)
epochs = 100
magnitude = create_mlp(shape, layers, False, "relu")
phase = create_mlp(shape, layers, False, "relu")

model = combine_models(phase, magnitude, (100,))
model.compile(loss='mean_squared_error', optimizer=opt, metrics=['mse', 'mae'])

history = model.fit(
    x=[x_train_magnitude, x_train_phase], y=y_train,
    validation_data=([x_test_magnitude, x_test_phase], y_test),
    epochs=epochs, batch_size=64, verbose=2
)

display_graphs(history)
```

## Combined phase and magnitude MLP

Epoch 1/100

1099/1099 - 6s - loss: 1160.7988 - mse: 1160.7988 - mae: 29.1174 - val\_loss: 839.3276 - val\_mse: 839.3276 - val\_mae: 22.1394 - 6s/epoch - 5ms/step

Epoch 2/100

1099/1099 - 5s - loss: 850.7573 - mse: 850.7573 - mae: 22.3549 - val\_loss: 862.6932 - val\_mse: 862.6932 - val\_mae: 23.2301 - 5s/epoch - 5ms/step

Epoch 3/100

1099/1099 - 5s - loss: 886.6873 - mse: 886.6873 - mae: 23.3135 - val\_loss: 822.5658 - val\_mse: 822.5658 - val\_mae: 21.8518 - 5s/epoch - 5ms/step

Epoch 4/100

1099/1099 - 5s - loss: 899.4001 - mse: 899.4001 - mae: 23.1954 - val\_loss: 824.9865 - val\_mse: 824.9865 - val\_mae: 21.7179 - 5s/epoch - 5ms/step

Epoch 5/100

1099/1099 - 6s - loss: 889.7295 - mse: 889.7295 - mae: 22.8137 - val\_loss: 831.6069 - val\_mse: 831.6069 - val\_mae: 22.0846 - 6s/epoch - 5ms/step

Epoch 6/100

1099/1099 - 6s - loss: 882.4093 - mse: 882.4093 - mae: 22.6073 - val\_loss: 830.0228 - val\_mse: 830.0228 - val\_mae: 21.9897 - 6s/epoch - 5ms/step

Epoch 7/100

1099/1099 - 6s - loss: 882.7578 - mse: 882.7578 - mae: 22.6185 - val\_loss: 836.4202 - val\_mse: 836.4202 - val\_mae: 22.2946 - 6s/epoch - 6ms/step

Epoch 8/100

1099/1099 - 6s - loss: 880.7620 - mse: 880.7620 - mae: 22.4999 - val\_loss: 832.5888 - val\_mse: 832.5888 - val\_mae: 22.1424 - 6s/epoch - 5ms/step

Epoch 9/100

1099/1099 - 7s - loss: 877.4773 - mse: 877.4773 - mae: 22.4463 - val\_loss: 824.7299 - val\_mse: 824.7299 - val\_mae: 21.7054 - 7s/epoch - 6ms/step

Epoch 10/100

1099/1099 - 6s - loss: 879.0146 - mse: 879.0146 - mae: 22.4808 - val\_loss: 820.3440 - val\_mse: 820.3440 - val\_mae: 21.4648 - 6s/epoch - 6ms/step

Epoch 11/100

1099/1099 - 7s - loss: 877.4171 - mse: 877.4171 - mae: 22.4215 - val\_loss: 833.1630 - val\_mse: 833.1630 - val\_mae: 22.1613 - 7s/epoch - 7ms/step

Epoch 12/100

1099/1099 - 7s - loss: 879.0385 - mse: 879.0385 - mae: 22.4585 - val\_loss: 828.8568 - val\_mse: 828.8568 - val\_mae: 21.9412 - 7s/epoch - 7ms/step

Epoch 13/100

1099/1099 - 6s - loss: 878.4192 - mse: 878.4192 - mae: 22.4000 - val\_loss: 855.6198 - val\_mse: 855.6198 - val\_mae: 23.2440 - 6s/epoch - 6ms/step

Epoch 14/100

1099/1099 - 6s - loss: 879.1103 - mse: 879.1103 - mae: 22.4191 - val\_loss: 864.3791 - val\_mse: 864.3791 - val\_mae: 23.5197 - 6s/epoch - 6ms/step

Epoch 15/100

1099/1099 - 6s - loss: 876.4810 - mse: 876.4810 - mae: 22.3373 - val\_loss: 826.1522 - val\_mse: 826.1522 - val\_mae: 21.8016 - 6s/epoch - 6ms/step

Epoch 16/100

1099/1099 - 6s - loss: 875.8093 - mse: 875.8093 - mae: 22.3037 - val\_loss: 866.4000 - val\_mse: 866.4000 - val\_mae: 23.5347 - 6s/epoch - 5ms/step

Epoch 17/100

1099/1099 - 6s - loss: 875.7653 - mse: 875.7653 - mae: 22.3045 - val\_loss: 859.7999 - val\_mse: 859.7999 - val\_mae: 23.3320 - 6s/epoch - 5ms/step

Epoch 18/100

1099/1099 - 6s - loss: 875.1384 - mse: 875.1384 - mae: 22.2903 - val\_loss: 854.0276 - val\_mse: 854.0276 - val\_mae: 23.0777 - 6s/epoch - 6ms/step

Epoch 19/100

1099/1099 - 7s - loss: 872.4057 - mse: 872.4057 - mae: 22.2192 - val\_loss: 831.4733 - val\_mse: 831.4733 - val\_mae: 21.9210 - 7s/epoch - 6ms/step

Epoch 20/100

1099/1099 - 6s - loss: 871.0380 - mse: 871.0380 - mae: 22.1650 - val\_loss: 819.5001 - val\_mse: 819.5001 - val\_mae: 21.4107 - 6s/epoch - 6ms/step

Epoch 21/100

1099/1099 - 6s - loss: 872.9109 - mse: 872.9109 - mae: 22.2108 - val\_loss: 869.9047 - val\_mse: 869.9047 - val\_mae: 23.6510 - 6s/epoch - 6ms/step

Epoch 22/100

1099/1099 - 6s - loss: 871.2349 - mse: 871.2349 - mae: 22.1822 - val\_loss: 843.9302 - val\_mse: 843.9302 - val\_mae: 22.5877 - 6s/epoch - 6ms/step

Epoch 23/100

1099/1099 - 7s - loss: 871.1306 - mse: 871.1306 - mae: 22.1468 - val\_loss: 848.7200 - val\_mse: 848.7200 - val\_mae: 22.8482 - 7s/epoch - 7ms/step

Epoch 24/100

1099/1099 - 7s - loss: 870.4270 - mse: 870.4270 - mae: 22.1254 - val\_loss: 870.5290 - val\_mse: 870.5290 - val\_mae: 23.6345 - 7s/epoch - 6ms/step

Epoch 25/100

1099/1099 - 6s - loss: 869.1323 - mse: 869.1323 - mae: 22.1169 - val\_loss: 838.6544 - val\_mse: 838.6544 - val\_mae: 22.3321 - 6s/epoch - 6ms/step

Epoch 26/100

1099/1099 - 6s - loss: 869.9578 - mse: 869.9578 - mae: 22.1771 - val\_loss: 844.3145 - val\_mse: 844.3145 - val\_mae: 22.6276 - 6s/epoch - 5ms/step

Epoch 27/100

1099/1099 - 6s - loss: 868.0432 - mse: 868.0432 - mae: 22.0504 - val\_loss: 844.0268 - val\_mse: 844.0268 - val\_mae: 22.6148 - 6s/epoch - 6ms/step

Epoch 28/100

1099/1099 - 6s - loss: 869.2097 - mse: 869.2097 - mae: 22.1096 - val\_loss: 847.3115 - val\_mse: 847.3115 - val\_mae: 22.6904 - 6s/epoch - 6ms/step

Epoch 29/100

1099/1099 - 6s - loss: 868.6246 - mse: 868.6246 - mae: 22.0933 - val\_loss: 824.5530 - val\_mse: 824.5530 - val\_mae: 21.5711 - 6s/epoch - 6ms/step

Epoch 30/100

1099/1099 - 6s - loss: 866.3220 - mse: 866.3220 - mae: 22.0226 - val\_loss: 873.5677 - val\_mse: 873.5677 - val\_mae: 23.7237 - 6s/epoch - 6ms/step

Epoch 31/100

1099/1099 - 6s - loss: 864.9031 - mse: 864.9031 - mae: 21.9878 - val\_loss: 872.0814 - val\_mse: 872.0814 - val\_mae: 23.5719 - 6s/epoch - 6ms/step

Epoch 32/100

1099/1099 - 7s - loss: 862.2986 - mse: 862.2986 - mae: 21.9398 - val\_loss: 932.2325 - val\_mse: 932.2325 - val\_mae: 25.4769 - 7s/epoch - 7ms/step

Epoch 33/100

1099/1099 - 6s - loss: 856.8076 - mse: 856.8076 - mae: 22.3601 - val\_loss: 1003.2310 - val\_mse: 1003.2310 - val\_mae: 26.8228 - 6s/epoch - 6ms/step

Epoch 34/100

1099/1099 - 6s - loss: 845.2343 - mse: 845.2343 - mae: 21.9452 - val\_loss: 921.0217 - val\_mse: 921.0217 - val\_mae: 24.9933 - 6s/epoch - 6ms/step

Epoch 35/100

1099/1099 - 6s - loss: 843.0671 - mse: 843.0671 - mae: 21.8988 - val\_loss: 1180.0701 - val\_mse: 1180.0701 - val\_mae: 29.9771 - 6s/epoch - 6ms/step

Epoch 36/100

1099/1099 - 6s - loss: 837.4772 - mse: 837.4772 - mae: 21.7079 - val\_loss: 990.1541 - val\_mse: 990.1541 - val\_mae: 26.3452 - 6s/epoch - 6ms/step

Epoch 37/100

1099/1099 - 6s - loss: 835.5450 - mse: 835.5450 - mae: 21.6329 - val\_loss: 992.3663 - val\_mse: 992.3663 - val\_mae: 26.6696 - 6s/epoch - 6ms/step

Epoch 38/100

1099/1099 - 6s - loss: 836.1897 - mse: 836.1897 - mae: 21.7209 - val\_loss: 896.5911 - val\_mse: 896.5911 - val\_mae: 24.2484 - 6s/epoch - 6ms/step

Epoch 39/100

1099/1099 - 7s - loss: 837.8904 - mse: 837.8904 - mae: 21.7402 - val\_loss: 991.7977 - val\_mse: 991.7977 - val\_mae: 26.5844 - 7s/epoch - 7ms/step

Epoch 40/100

1099/1099 - 6s - loss: 835.1814 - mse: 835.1814 - mae: 21.6376 - val\_loss: 950.8079 - val\_mse: 950.8079 - val\_mae: 25.6758 - 6s/epoch - 6ms/step

Epoch 41/100

1099/1099 - 6s - loss: 833.3247 - mse: 833.3247 - mae: 21.5855 - val\_loss: 910.2947 - val\_mse: 910.2947 - val\_mae: 24.3208 - 6s/epoch - 6ms/step  
Epoch 42/100  
1099/1099 - 6s - loss: 834.6976 - mse: 834.6976 - mae: 21.6569 - val\_loss: 1014.4595 - val\_mse: 1014.4595 - val\_mae: 27.0005 - 6s/epoch - 6ms/step  
Epoch 43/100  
1099/1099 - 6s - loss: 831.9370 - mse: 831.9370 - mae: 21.5855 - val\_loss: 971.4543 - val\_mse: 971.4543 - val\_mae: 26.1990 - 6s/epoch - 6ms/step  
Epoch 44/100  
1099/1099 - 7s - loss: 834.3298 - mse: 834.3298 - mae: 21.6601 - val\_loss: 1015.9818 - val\_mse: 1015.9818 - val\_mae: 27.2290 - 7s/epoch - 7ms/step  
Epoch 45/100  
1099/1099 - 6s - loss: 828.3297 - mse: 828.3297 - mae: 21.4770 - val\_loss: 987.4369 - val\_mse: 987.4369 - val\_mae: 26.4562 - 6s/epoch - 5ms/step  
Epoch 46/100  
1099/1099 - 6s - loss: 832.3073 - mse: 832.3073 - mae: 21.5583 - val\_loss: 954.5560 - val\_mse: 954.5560 - val\_mae: 25.9113 - 6s/epoch - 6ms/step  
Epoch 47/100  
1099/1099 - 6s - loss: 829.1141 - mse: 829.1141 - mae: 21.4831 - val\_loss: 1007.4603 - val\_mse: 1007.4603 - val\_mae: 26.8880 - 6s/epoch - 6ms/step  
Epoch 48/100  
1099/1099 - 6s - loss: 827.4802 - mse: 827.4802 - mae: 21.4408 - val\_loss: 1044.4388 - val\_mse: 1044.4388 - val\_mae: 27.6558 - 6s/epoch - 6ms/step  
Epoch 49/100  
1099/1099 - 6s - loss: 829.3449 - mse: 829.3449 - mae: 21.4961 - val\_loss: 975.7231 - val\_mse: 975.7231 - val\_mae: 26.3347 - 6s/epoch - 6ms/step  
Epoch 50/100  
1099/1099 - 7s - loss: 829.1282 - mse: 829.1282 - mae: 21.4973 - val\_loss: 887.6825 - val\_mse: 887.6825 - val\_mae: 23.8855 - 7s/epoch - 7ms/step  
Epoch 51/100  
1099/1099 - 6s - loss: 825.1048 - mse: 825.1048 - mae: 21.3619 - val\_loss: 1000.1084 - val\_mse: 1000.1084 - val\_mae: 26.9502 - 6s/epoch - 6ms/step  
Epoch 52/100  
1099/1099 - 6s - loss: 827.0781 - mse: 827.0781 - mae: 21.4194 - val\_loss: 892.9966 - val\_mse: 892.9966 - val\_mae: 24.1649 - 6s/epoch - 6ms/step  
Epoch 53/100  
1099/1099 - 6s - loss: 825.1522 - mse: 825.1522 - mae: 21.3374 - val\_loss: 1018.4515 - val\_mse: 1018.4515 - val\_mae: 27.1628 - 6s/epoch - 6ms/step  
Epoch 54/100  
1099/1099 - 6s - loss: 828.1694 - mse: 828.1694 - mae: 21.4839 - val\_loss: 887.5793 - val\_mse: 887.5793 - val\_mae: 23.7374 - 6s/epoch - 6ms/step  
Epoch 55/100  
1099/1099 - 6s - loss: 823.4644 - mse: 823.4644 - mae: 21.3255 - val\_loss: 981.0608 - val\_mse: 981.0608 - val\_mae: 26.2095 - 6s/epoch - 6ms/step  
Epoch 56/100  
1099/1099 - 6s - loss: 825.6766 - mse: 825.6766 - mae: 21.4323 - val\_loss: 910.5843 - val\_mse: 910.5843 - val\_mae: 24.0649 - 6s/epoch - 6ms/step  
Epoch 57/100  
1099/1099 - 6s - loss: 828.0320 - mse: 828.0320 - mae: 21.4993 - val\_loss: 981.6595 - val\_mse: 981.6595 - val\_mae: 26.1670 - 6s/epoch - 6ms/step  
Epoch 58/100  
1099/1099 - 6s - loss: 825.9957 - mse: 825.9957 - mae: 21.4299 - val\_loss: 887.8928 - val\_mse: 887.8928 - val\_mae: 23.9181 - 6s/epoch - 5ms/step  
Epoch 59/100  
1099/1099 - 6s - loss: 821.7504 - mse: 821.7504 - mae: 21.2495 - val\_loss: 933.5782 - val\_mse: 933.5782 - val\_mae: 25.1809 - 6s/epoch - 6ms/step  
Epoch 60/100  
1099/1099 - 6s - loss: 825.7421 - mse: 825.7421 - mae: 21.4689 - val\_loss: 920.7244 - val\_mse: 920.7244 - val\_mae: 24.6342 - 6s/epoch - 6ms/step  
Epoch 61/100  
1099/1099 - 6s - loss: 825.4214 - mse: 825.4214 - mae: 21.4020 - val\_loss:

973.1340 - val\_mse: 973.1340 - val\_mae: 25.8471 - 6s/epoch - 6ms/step  
Epoch 62/100  
1099/1099 - 6s - loss: 823.8640 - mse: 823.8640 - mae: 21.3425 - val\_loss:  
994.8273 - val\_mse: 994.8273 - val\_mae: 26.8518 - 6s/epoch - 6ms/step  
Epoch 63/100  
1099/1099 - 6s - loss: 821.8875 - mse: 821.8875 - mae: 21.2884 - val\_loss:  
961.1295 - val\_mse: 961.1295 - val\_mae: 25.7012 - 6s/epoch - 6ms/step  
Epoch 64/100  
1099/1099 - 6s - loss: 822.3743 - mse: 822.3743 - mae: 21.3059 - val\_loss:  
963.3755 - val\_mse: 963.3755 - val\_mae: 25.9735 - 6s/epoch - 6ms/step  
Epoch 65/100  
1099/1099 - 6s - loss: 823.1197 - mse: 823.1197 - mae: 21.2894 - val\_loss:  
1076.0620 - val\_mse: 1076.0620 - val\_mae: 28.2659 - 6s/epoch - 6ms/step  
Epoch 66/100  
1099/1099 - 6s - loss: 823.2582 - mse: 823.2582 - mae: 21.3467 - val\_loss:  
924.6721 - val\_mse: 924.6721 - val\_mae: 25.2733 - 6s/epoch - 6ms/step  
Epoch 67/100  
1099/1099 - 7s - loss: 819.0307 - mse: 819.0307 - mae: 21.2006 - val\_loss:  
1038.4603 - val\_mse: 1038.4603 - val\_mae: 27.6934 - 7s/epoch - 7ms/step  
Epoch 68/100  
1099/1099 - 6s - loss: 821.0760 - mse: 821.0760 - mae: 21.2722 - val\_loss:  
957.9235 - val\_mse: 957.9235 - val\_mae: 25.8656 - 6s/epoch - 6ms/step  
Epoch 69/100  
1099/1099 - 6s - loss: 819.2399 - mse: 819.2399 - mae: 21.2049 - val\_loss:  
1012.6394 - val\_mse: 1012.6394 - val\_mae: 27.0028 - 6s/epoch - 6ms/step  
Epoch 70/100  
1099/1099 - 6s - loss: 821.4293 - mse: 821.4293 - mae: 21.3082 - val\_loss:  
953.3994 - val\_mse: 953.3994 - val\_mae: 25.9336 - 6s/epoch - 6ms/step  
Epoch 71/100  
1099/1099 - 6s - loss: 818.0891 - mse: 818.0891 - mae: 21.1422 - val\_loss:  
990.7744 - val\_mse: 990.7744 - val\_mae: 26.5428 - 6s/epoch - 5ms/step  
Epoch 72/100  
1099/1099 - 6s - loss: 819.9103 - mse: 819.9103 - mae: 21.2322 - val\_loss:  
970.6887 - val\_mse: 970.6887 - val\_mae: 26.1720 - 6s/epoch - 6ms/step  
Epoch 73/100  
1099/1099 - 6s - loss: 821.0626 - mse: 821.0626 - mae: 21.2708 - val\_loss:  
902.1854 - val\_mse: 902.1854 - val\_mae: 24.2350 - 6s/epoch - 6ms/step  
Epoch 74/100  
1099/1099 - 6s - loss: 820.0794 - mse: 820.0794 - mae: 21.2683 - val\_loss:  
1049.1769 - val\_mse: 1049.1769 - val\_mae: 27.9341 - 6s/epoch - 6ms/step  
Epoch 75/100  
1099/1099 - 6s - loss: 819.6113 - mse: 819.6113 - mae: 21.2348 - val\_loss:  
991.4899 - val\_mse: 991.4899 - val\_mae: 26.5289 - 6s/epoch - 6ms/step  
Epoch 76/100  
1099/1099 - 6s - loss: 821.8063 - mse: 821.8063 - mae: 21.3477 - val\_loss:  
947.4858 - val\_mse: 947.4858 - val\_mae: 25.4427 - 6s/epoch - 6ms/step  
Epoch 77/100  
1099/1099 - 6s - loss: 818.5608 - mse: 818.5608 - mae: 21.2030 - val\_loss:  
1007.5850 - val\_mse: 1007.5850 - val\_mae: 27.0520 - 6s/epoch - 6ms/step  
Epoch 78/100  
1099/1099 - 6s - loss: 821.1790 - mse: 821.1790 - mae: 21.2650 - val\_loss:  
991.5563 - val\_mse: 991.5563 - val\_mae: 26.6328 - 6s/epoch - 6ms/step  
Epoch 79/100  
1099/1099 - 6s - loss: 818.3260 - mse: 818.3260 - mae: 21.1611 - val\_loss:  
913.4271 - val\_mse: 913.4271 - val\_mae: 24.5380 - 6s/epoch - 6ms/step  
Epoch 80/100  
1099/1099 - 6s - loss: 820.8469 - mse: 820.8469 - mae: 21.2970 - val\_loss:  
934.7679 - val\_mse: 934.7679 - val\_mae: 25.3277 - 6s/epoch - 6ms/step  
Epoch 81/100  
1099/1099 - 6s - loss: 816.0352 - mse: 816.0352 - mae: 21.0942 - val\_loss:  
970.8801 - val\_mse: 970.8801 - val\_mae: 26.1254 - 6s/epoch - 6ms/step

Epoch 82/100

1099/1099 - 6s - loss: 816.1267 - mse: 816.1267 - mae: 21.1407 - val\_loss:  
1035.9791 - val\_mse: 1035.9791 - val\_mae: 27.5966 - 6s/epoch - 6ms/step

Epoch 83/100

1099/1099 - 6s - loss: 821.0897 - mse: 821.0897 - mae: 21.3090 - val\_loss:  
1070.9496 - val\_mse: 1070.9496 - val\_mae: 28.2598 - 6s/epoch - 6ms/step

Epoch 84/100

1099/1099 - 6s - loss: 817.3135 - mse: 817.3135 - mae: 21.1630 - val\_loss:  
949.0818 - val\_mse: 949.0818 - val\_mae: 25.7700 - 6s/epoch - 6ms/step

Epoch 85/100

1099/1099 - 6s - loss: 817.8994 - mse: 817.8994 - mae: 21.1881 - val\_loss:  
1013.4827 - val\_mse: 1013.4827 - val\_mae: 27.1379 - 6s/epoch - 6ms/step

Epoch 86/100

1099/1099 - 6s - loss: 817.3448 - mse: 817.3448 - mae: 21.1482 - val\_loss:  
988.7957 - val\_mse: 988.7957 - val\_mae: 26.5657 - 6s/epoch - 6ms/step

Epoch 87/100

1099/1099 - 6s - loss: 817.2839 - mse: 817.2839 - mae: 21.1503 - val\_loss:  
1009.3849 - val\_mse: 1009.3849 - val\_mae: 27.1494 - 6s/epoch - 6ms/step

Epoch 88/100

1099/1099 - 6s - loss: 815.7974 - mse: 815.7974 - mae: 21.0990 - val\_loss:  
1032.8468 - val\_mse: 1032.8468 - val\_mae: 27.3752 - 6s/epoch - 6ms/step

Epoch 89/100

1099/1099 - 7s - loss: 818.4869 - mse: 818.4869 - mae: 21.2144 - val\_loss:  
1086.7516 - val\_mse: 1086.7516 - val\_mae: 28.5238 - 7s/epoch - 7ms/step

Epoch 90/100

1099/1099 - 6s - loss: 818.3413 - mse: 818.3413 - mae: 21.1691 - val\_loss:  
1019.2678 - val\_mse: 1019.2678 - val\_mae: 27.2985 - 6s/epoch - 6ms/step

Epoch 91/100

1099/1099 - 6s - loss: 817.2847 - mse: 817.2847 - mae: 21.1618 - val\_loss:  
1105.4916 - val\_mse: 1105.4916 - val\_mae: 28.9366 - 6s/epoch - 6ms/step

Epoch 92/100

1099/1099 - 6s - loss: 861.6264 - mse: 861.6264 - mae: 22.2756 - val\_loss:  
939.6790 - val\_mse: 939.6790 - val\_mae: 25.6983 - 6s/epoch - 6ms/step

Epoch 93/100

1099/1099 - 6s - loss: 854.3825 - mse: 854.3825 - mae: 22.0392 - val\_loss:  
1060.2773 - val\_mse: 1060.2773 - val\_mae: 28.0078 - 6s/epoch - 6ms/step

Epoch 94/100

1099/1099 - 6s - loss: 853.1929 - mse: 853.1929 - mae: 22.0329 - val\_loss:  
955.7607 - val\_mse: 955.7607 - val\_mae: 25.8691 - 6s/epoch - 6ms/step

Epoch 95/100

1099/1099 - 6s - loss: 851.3802 - mse: 851.3802 - mae: 21.9998 - val\_loss:  
981.9319 - val\_mse: 981.9319 - val\_mae: 26.5908 - 6s/epoch - 6ms/step

Epoch 96/100

1099/1099 - 6s - loss: 847.2726 - mse: 847.2726 - mae: 21.8679 - val\_loss:  
1003.0464 - val\_mse: 1003.0464 - val\_mae: 27.0066 - 6s/epoch - 6ms/step

Epoch 97/100

1099/1099 - 6s - loss: 848.1429 - mse: 848.1429 - mae: 21.8826 - val\_loss:  
948.3785 - val\_mse: 948.3785 - val\_mae: 25.6810 - 6s/epoch - 6ms/step

Epoch 98/100

1099/1099 - 7s - loss: 848.6848 - mse: 848.6848 - mae: 21.9154 - val\_loss:  
960.7416 - val\_mse: 960.7416 - val\_mae: 26.1054 - 7s/epoch - 7ms/step

Epoch 99/100

1099/1099 - 6s - loss: 846.0694 - mse: 846.0694 - mae: 21.8110 - val\_loss:  
1095.2157 - val\_mse: 1095.2157 - val\_mae: 28.8653 - 6s/epoch - 6ms/step

Epoch 100/100

1099/1099 - 6s - loss: 843.0551 - mse: 843.0551 - mae: 21.7486 - val\_loss:  
1122.6912 - val\_mse: 1122.6912 - val\_mae: 29.3969 - 6s/epoch - 6ms/step

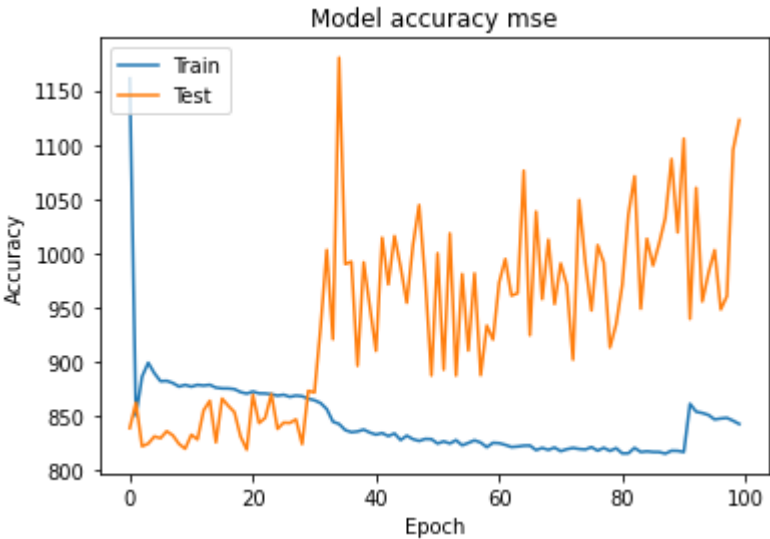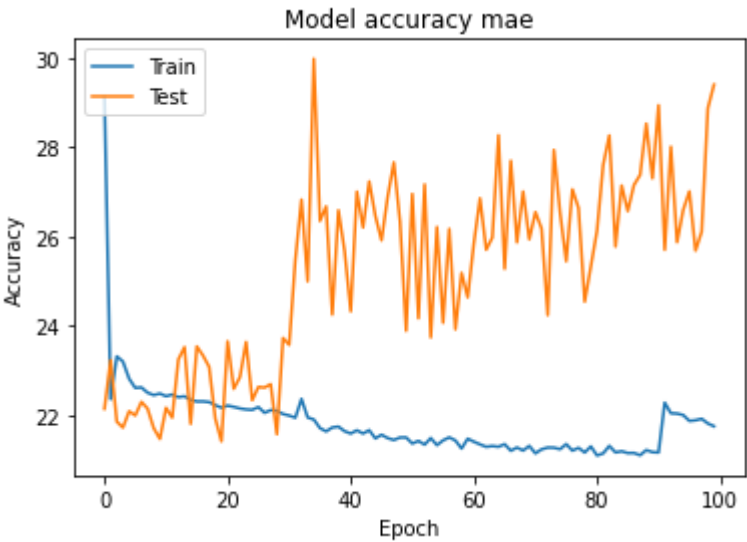

In [ ]:

```
print("Combined phase and magnitude 1D CNN")

shape=(400,1)
filters=(64,64)
layers=(100,)
epochs = 25

phase = create_1d_cnn(shape, False, filters, layers, 'relu')
magnitude = create_1d_cnn(shape, False, filters, layers, 'relu')

model = combine_models(phase, magnitude, (100,))
model.compile(loss='mean_squared_error', optimizer=opt, metrics=['mse', 'mae'])

history = model.fit(
x=[x_train_magnitude, x_train_phase], y=y_train,
  validation_data=(x_test_magnitude, x_test_phase), y_test),
  epochs=epochs, batch_size=32, verbose=2
)

display_graphs(history)
```



## Combined phase and magnitude 1D CNN

Epoch 1/25

2197/2197 - 80s - loss: 1220.6002 - mse: 1220.6002 - mae: 30.2637 - val\_loss: 1219.1748 - val\_mse: 1219.1748 - val\_mae: 30.2259 - 80s/epoch - 36ms/step

Epoch 2/25

2197/2197 - 79s - loss: 1157.1746 - mse: 1157.1746 - mae: 29.0005 - val\_loss: 872.7557 - val\_mse: 872.7557 - val\_mae: 23.1333 - 79s/epoch - 36ms/step

Epoch 3/25

2197/2197 - 79s - loss: 892.3754 - mse: 892.3754 - mae: 23.4623 - val\_loss: 841.6179 - val\_mse: 841.6179 - val\_mae: 22.3831 - 79s/epoch - 36ms/step

Epoch 4/25

2197/2197 - 80s - loss: 859.7294 - mse: 859.7294 - mae: 22.6779 - val\_loss: 816.6395 - val\_mse: 816.6395 - val\_mae: 21.5457 - 80s/epoch - 37ms/step

Epoch 5/25

2197/2197 - 79s - loss: 847.0652 - mse: 847.0652 - mae: 22.3496 - val\_loss: 817.9431 - val\_mse: 817.9431 - val\_mae: 21.5676 - 79s/epoch - 36ms/step

Epoch 6/25

2197/2197 - 79s - loss: 840.1111 - mse: 840.1111 - mae: 22.1464 - val\_loss: 805.5706 - val\_mse: 805.5706 - val\_mae: 21.0332 - 79s/epoch - 36ms/step

Epoch 7/25

2197/2197 - 79s - loss: 837.1849 - mse: 837.1849 - mae: 22.0298 - val\_loss: 803.6928 - val\_mse: 803.6928 - val\_mae: 20.9130 - 79s/epoch - 36ms/step

Epoch 8/25

2197/2197 - 79s - loss: 833.8599 - mse: 833.8599 - mae: 21.9441 - val\_loss: 804.5002 - val\_mse: 804.5002 - val\_mae: 21.0440 - 79s/epoch - 36ms/step

Epoch 9/25

2197/2197 - 79s - loss: 831.5854 - mse: 831.5854 - mae: 21.8482 - val\_loss: 799.5566 - val\_mse: 799.5566 - val\_mae: 20.7610 - 79s/epoch - 36ms/step

Epoch 10/25

2197/2197 - 79s - loss: 828.8486 - mse: 828.8486 - mae: 21.7598 - val\_loss: 797.6318 - val\_mse: 797.6318 - val\_mae: 20.6770 - 79s/epoch - 36ms/step

Epoch 11/25

2197/2197 - 79s - loss: 826.9105 - mse: 826.9105 - mae: 21.7105 - val\_loss: 800.8671 - val\_mse: 800.8671 - val\_mae: 20.8350 - 79s/epoch - 36ms/step

Epoch 12/25

2197/2197 - 79s - loss: 824.7219 - mse: 824.7219 - mae: 21.6550 - val\_loss: 798.1375 - val\_mse: 798.1375 - val\_mae: 20.7393 - 79s/epoch - 36ms/step

Epoch 13/25

2197/2197 - 81s - loss: 824.5361 - mse: 824.5361 - mae: 21.6288 - val\_loss: 798.0524 - val\_mse: 798.0524 - val\_mae: 20.7259 - 81s/epoch - 37ms/step

Epoch 14/25

2197/2197 - 80s - loss: 821.8154 - mse: 821.8154 - mae: 21.5439 - val\_loss: 798.1330 - val\_mse: 798.1330 - val\_mae: 20.8334 - 80s/epoch - 36ms/step

Epoch 15/25

2197/2197 - 80s - loss: 819.6967 - mse: 819.6967 - mae: 21.4776 - val\_loss: 791.4188 - val\_mse: 791.4188 - val\_mae: 20.3518 - 80s/epoch - 36ms/step

Epoch 16/25

2197/2197 - 79s - loss: 816.9409 - mse: 816.9409 - mae: 21.4119 - val\_loss: 793.8566 - val\_mse: 793.8566 - val\_mae: 20.5989 - 79s/epoch - 36ms/step

Epoch 17/25

2197/2197 - 80s - loss: 815.9241 - mse: 815.9241 - mae: 21.3939 - val\_loss: 793.5234 - val\_mse: 793.5234 - val\_mae: 20.6120 - 80s/epoch - 36ms/step

Epoch 18/25

2197/2197 - 79s - loss: 813.7479 - mse: 813.7479 - mae: 21.3479 - val\_loss: 790.1821 - val\_mse: 790.1821 - val\_mae: 20.4374 - 79s/epoch - 36ms/step

Epoch 19/25

2197/2197 - 79s - loss: 812.9620 - mse: 812.9620 - mae: 21.3346 - val\_loss: 790.8671 - val\_mse: 790.8671 - val\_mae: 20.4274 - 79s/epoch - 36ms/step

Epoch 20/25

2197/2197 - 79s - loss: 810.6888 - mse: 810.6888 - mae: 21.2966 - val\_loss: 799.6179 - val\_mse: 799.6179 - val\_mae: 21.0651 - 79s/epoch - 36ms/step  
Epoch 21/25  
2197/2197 - 79s - loss: 810.4232 - mse: 810.4232 - mae: 21.2821 - val\_loss: 785.7637 - val\_mse: 785.7637 - val\_mae: 20.3084 - 79s/epoch - 36ms/step  
Epoch 22/25  
2197/2197 - 79s - loss: 806.1116 - mse: 806.1116 - mae: 21.2032 - val\_loss: 785.1890 - val\_mse: 785.1890 - val\_mae: 20.3372 - 79s/epoch - 36ms/step  
Epoch 23/25  
2197/2197 - 79s - loss: 804.5637 - mse: 804.5637 - mae: 21.1610 - val\_loss: 792.9572 - val\_mse: 792.9572 - val\_mae: 20.5797 - 79s/epoch - 36ms/step  
Epoch 24/25  
2197/2197 - 80s - loss: 804.6298 - mse: 804.6298 - mae: 21.1738 - val\_loss: 780.7781 - val\_mse: 780.7781 - val\_mae: 20.1061 - 80s/epoch - 36ms/step  
Epoch 25/25  
2197/2197 - 79s - loss: 803.6085 - mse: 803.6085 - mae: 21.1545 - val\_loss: 786.3569 - val\_mse: 786.3569 - val\_mae: 20.2600 - 79s/epoch - 36ms/step

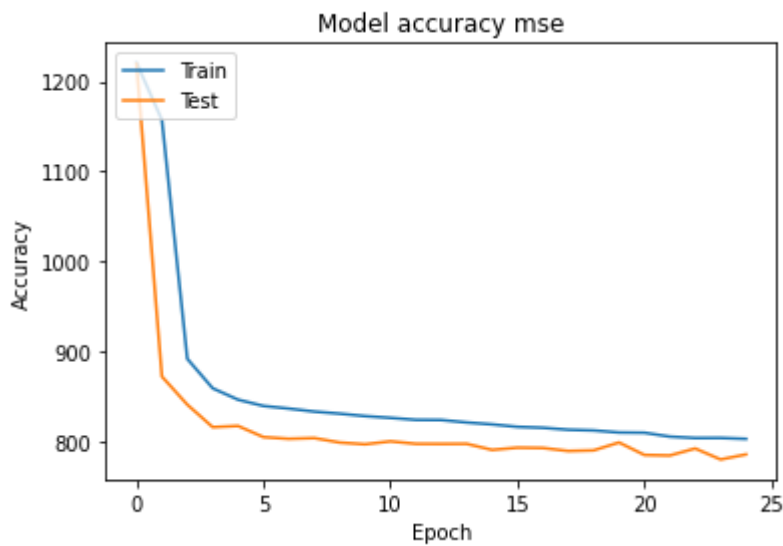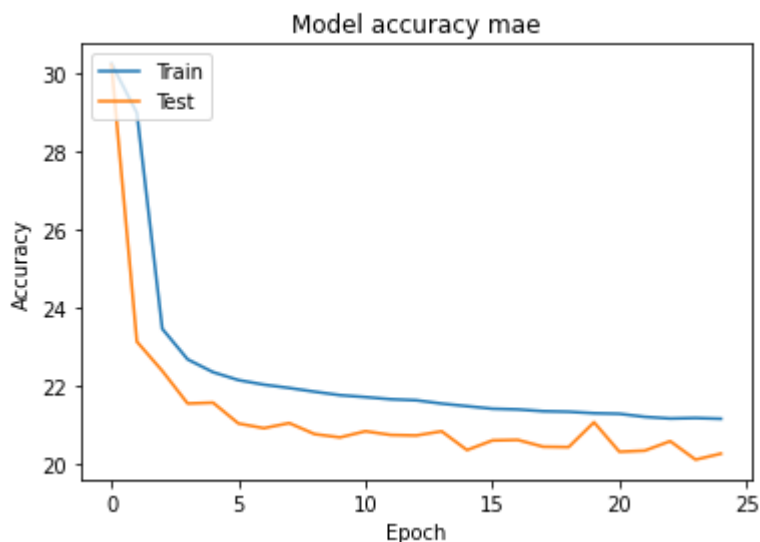

In [ ]:

```
print("Individual phase MLP")

layers = (400,200,)
shape = (400,)
model = create_mlp(shape, layers, True, "relu")
model.compile(loss='mean_squared_error', optimizer=opt, metrics=['mse', 'mae'])
epochs = 100

history = model.fit(
    x= x_train_phase, y=y_train,
    validation_data=(x_test_phase, y_test),
    epochs=epochs, batch_size=64, verbose=2
)

display_graphs(history)
```

## Individual phase MLP

Epoch 1/100

1099/1099 - 5s - loss: 1178.8048 - mse: 1178.8048 - mae: 29.5413 - val\_loss: 904.4475 - val\_mse: 904.4475 - val\_mae: 24.3537 - 5s/epoch - 4ms/step

Epoch 2/100

1099/1099 - 4s - loss: 899.7714 - mse: 899.7714 - mae: 23.4799 - val\_loss: 819.3149 - val\_mse: 819.3149 - val\_mae: 21.3965 - 4s/epoch - 4ms/step

Epoch 3/100

1099/1099 - 4s - loss: 877.3381 - mse: 877.3381 - mae: 22.8032 - val\_loss: 816.1785 - val\_mse: 816.1785 - val\_mae: 21.1964 - 4s/epoch - 4ms/step

Epoch 4/100

1099/1099 - 4s - loss: 869.4628 - mse: 869.4628 - mae: 22.5679 - val\_loss: 814.9371 - val\_mse: 814.9371 - val\_mae: 21.2084 - 4s/epoch - 4ms/step

Epoch 5/100

1099/1099 - 4s - loss: 861.9856 - mse: 861.9856 - mae: 22.3377 - val\_loss: 813.5656 - val\_mse: 813.5656 - val\_mae: 21.0804 - 4s/epoch - 4ms/step

Epoch 6/100

1099/1099 - 4s - loss: 858.8546 - mse: 858.8546 - mae: 22.1942 - val\_loss: 806.8504 - val\_mse: 806.8504 - val\_mae: 20.7616 - 4s/epoch - 4ms/step

Epoch 7/100

1099/1099 - 4s - loss: 856.7785 - mse: 856.7785 - mae: 22.0963 - val\_loss: 810.7910 - val\_mse: 810.7910 - val\_mae: 21.0390 - 4s/epoch - 4ms/step

Epoch 8/100

1099/1099 - 4s - loss: 855.7548 - mse: 855.7548 - mae: 22.0587 - val\_loss: 806.7463 - val\_mse: 806.7463 - val\_mae: 20.8784 - 4s/epoch - 4ms/step

Epoch 9/100

1099/1099 - 4s - loss: 855.4448 - mse: 855.4448 - mae: 22.0438 - val\_loss: 819.9221 - val\_mse: 819.9221 - val\_mae: 21.5502 - 4s/epoch - 4ms/step

Epoch 10/100

1099/1099 - 4s - loss: 870.4656 - mse: 870.4656 - mae: 22.3710 - val\_loss: 828.5594 - val\_mse: 828.5594 - val\_mae: 21.8186 - 4s/epoch - 4ms/step

Epoch 11/100

1099/1099 - 4s - loss: 869.5441 - mse: 869.5441 - mae: 22.3604 - val\_loss: 821.2865 - val\_mse: 821.2865 - val\_mae: 21.4147 - 4s/epoch - 4ms/step

Epoch 12/100

1099/1099 - 4s - loss: 869.9234 - mse: 869.9234 - mae: 22.3428 - val\_loss: 803.5031 - val\_mse: 803.5031 - val\_mae: 20.7240 - 4s/epoch - 4ms/step

Epoch 13/100

1099/1099 - 4s - loss: 869.9924 - mse: 869.9924 - mae: 22.3595 - val\_loss: 818.5774 - val\_mse: 818.5774 - val\_mae: 21.3416 - 4s/epoch - 4ms/step

Epoch 14/100

1099/1099 - 4s - loss: 884.3769 - mse: 884.3769 - mae: 22.6770 - val\_loss: 837.0696 - val\_mse: 837.0696 - val\_mae: 22.3369 - 4s/epoch - 4ms/step

Epoch 15/100

1099/1099 - 4s - loss: 883.5400 - mse: 883.5400 - mae: 22.6156 - val\_loss: 827.1506 - val\_mse: 827.1506 - val\_mae: 21.8325 - 4s/epoch - 4ms/step

Epoch 16/100

1099/1099 - 4s - loss: 882.4920 - mse: 882.4920 - mae: 22.5831 - val\_loss: 843.0494 - val\_mse: 843.0494 - val\_mae: 22.5551 - 4s/epoch - 4ms/step

Epoch 17/100

1099/1099 - 4s - loss: 881.4160 - mse: 881.4160 - mae: 22.5335 - val\_loss: 854.4424 - val\_mse: 854.4424 - val\_mae: 23.1077 - 4s/epoch - 4ms/step

Epoch 18/100

1099/1099 - 4s - loss: 882.5658 - mse: 882.5658 - mae: 22.5591 - val\_loss: 846.2364 - val\_mse: 846.2364 - val\_mae: 22.7384 - 4s/epoch - 4ms/step

Epoch 19/100

1099/1099 - 4s - loss: 881.0998 - mse: 881.0998 - mae: 22.5273 - val\_loss: 821.5408 - val\_mse: 821.5408 - val\_mae: 21.5656 - 4s/epoch - 4ms/step

Epoch 20/100

1099/1099 - 4s - loss: 881.0446 - mse: 881.0446 - mae: 22.4978 - val\_loss: 827.4987 - val\_mse: 827.4987 - val\_mae: 21.8045 - 4s/epoch - 4ms/step

Epoch 21/100

1099/1099 - 4s - loss: 881.6171 - mse: 881.6171 - mae: 22.5175 - val\_loss: 829.2147 - val\_mse: 829.2147 - val\_mae: 21.9539 - 4s/epoch - 4ms/step

Epoch 22/100

1099/1099 - 4s - loss: 878.2720 - mse: 878.2720 - mae: 22.4585 - val\_loss: 833.0135 - val\_mse: 833.0135 - val\_mae: 22.1200 - 4s/epoch - 4ms/step

Epoch 23/100

1099/1099 - 4s - loss: 880.4625 - mse: 880.4625 - mae: 22.5022 - val\_loss: 856.4400 - val\_mse: 856.4400 - val\_mae: 23.2336 - 4s/epoch - 4ms/step

Epoch 24/100

1099/1099 - 4s - loss: 880.4173 - mse: 880.4173 - mae: 22.5089 - val\_loss: 844.7530 - val\_mse: 844.7530 - val\_mae: 22.7164 - 4s/epoch - 4ms/step

Epoch 25/100

1099/1099 - 4s - loss: 880.8441 - mse: 880.8441 - mae: 22.5120 - val\_loss: 839.4336 - val\_mse: 839.4336 - val\_mae: 22.4485 - 4s/epoch - 4ms/step

Epoch 26/100

1099/1099 - 4s - loss: 878.6341 - mse: 878.6341 - mae: 22.4731 - val\_loss: 844.5924 - val\_mse: 844.5924 - val\_mae: 22.6805 - 4s/epoch - 4ms/step

Epoch 27/100

1099/1099 - 4s - loss: 880.3096 - mse: 880.3096 - mae: 22.4943 - val\_loss: 821.0124 - val\_mse: 821.0124 - val\_mae: 21.6089 - 4s/epoch - 4ms/step

Epoch 28/100

1099/1099 - 4s - loss: 879.2229 - mse: 879.2229 - mae: 22.4753 - val\_loss: 827.2873 - val\_mse: 827.2873 - val\_mae: 21.8376 - 4s/epoch - 4ms/step

Epoch 29/100

1099/1099 - 4s - loss: 877.5983 - mse: 877.5983 - mae: 22.4277 - val\_loss: 823.5847 - val\_mse: 823.5847 - val\_mae: 21.6525 - 4s/epoch - 4ms/step

Epoch 30/100

1099/1099 - 4s - loss: 881.9590 - mse: 881.9590 - mae: 22.5140 - val\_loss: 836.6258 - val\_mse: 836.6258 - val\_mae: 22.2890 - 4s/epoch - 4ms/step

Epoch 31/100

1099/1099 - 4s - loss: 880.3392 - mse: 880.3392 - mae: 22.4773 - val\_loss: 825.2965 - val\_mse: 825.2965 - val\_mae: 21.7188 - 4s/epoch - 4ms/step

Epoch 32/100

1099/1099 - 4s - loss: 881.0264 - mse: 881.0264 - mae: 22.4972 - val\_loss: 829.7279 - val\_mse: 829.7279 - val\_mae: 21.9066 - 4s/epoch - 4ms/step

Epoch 33/100

1099/1099 - 4s - loss: 880.6066 - mse: 880.6066 - mae: 22.4781 - val\_loss: 838.5851 - val\_mse: 838.5851 - val\_mae: 22.4061 - 4s/epoch - 4ms/step

Epoch 34/100

1099/1099 - 4s - loss: 878.0634 - mse: 878.0634 - mae: 22.4318 - val\_loss: 846.1062 - val\_mse: 846.1062 - val\_mae: 22.7566 - 4s/epoch - 4ms/step

Epoch 35/100

1099/1099 - 4s - loss: 880.7267 - mse: 880.7267 - mae: 22.4947 - val\_loss: 827.2817 - val\_mse: 827.2817 - val\_mae: 21.8625 - 4s/epoch - 4ms/step

Epoch 36/100

1099/1099 - 4s - loss: 880.2900 - mse: 880.2900 - mae: 22.4836 - val\_loss: 828.8666 - val\_mse: 828.8666 - val\_mae: 21.9059 - 4s/epoch - 4ms/step

Epoch 37/100

1099/1099 - 4s - loss: 882.3223 - mse: 882.3223 - mae: 22.5170 - val\_loss: 831.2516 - val\_mse: 831.2516 - val\_mae: 22.0258 - 4s/epoch - 4ms/step

Epoch 38/100

1099/1099 - 4s - loss: 878.8930 - mse: 878.8930 - mae: 22.4521 - val\_loss: 838.0955 - val\_mse: 838.0955 - val\_mae: 22.3926 - 4s/epoch - 4ms/step

Epoch 39/100

1099/1099 - 4s - loss: 880.7906 - mse: 880.7906 - mae: 22.4835 - val\_loss: 832.8340 - val\_mse: 832.8340 - val\_mae: 22.1230 - 4s/epoch - 4ms/step

Epoch 40/100

1099/1099 - 4s - loss: 881.0157 - mse: 881.0157 - mae: 22.4950 - val\_loss: 827.2386 - val\_mse: 827.2386 - val\_mae: 21.7964 - 4s/epoch - 4ms/step

Epoch 41/100

1099/1099 - 4s - loss: 879.6343 - mse: 879.6343 - mae: 22.4598 - val\_loss: 858.5533 - val\_mse: 858.5533 - val\_mae: 23.2702 - 4s/epoch - 4ms/step  
Epoch 42/100  
1099/1099 - 4s - loss: 879.3191 - mse: 879.3191 - mae: 22.4506 - val\_loss: 830.7242 - val\_mse: 830.7242 - val\_mae: 21.9869 - 4s/epoch - 4ms/step  
Epoch 43/100  
1099/1099 - 4s - loss: 880.8995 - mse: 880.8995 - mae: 22.4809 - val\_loss: 828.3899 - val\_mse: 828.3899 - val\_mae: 21.8816 - 4s/epoch - 4ms/step  
Epoch 44/100  
1099/1099 - 4s - loss: 880.8865 - mse: 880.8865 - mae: 22.4826 - val\_loss: 838.2971 - val\_mse: 838.2971 - val\_mae: 22.4052 - 4s/epoch - 4ms/step  
Epoch 45/100  
1099/1099 - 4s - loss: 879.2414 - mse: 879.2414 - mae: 22.4517 - val\_loss: 843.7450 - val\_mse: 843.7450 - val\_mae: 22.6395 - 4s/epoch - 4ms/step  
Epoch 46/100  
1099/1099 - 4s - loss: 880.6681 - mse: 880.6681 - mae: 22.4893 - val\_loss: 833.7660 - val\_mse: 833.7660 - val\_mae: 22.1947 - 4s/epoch - 4ms/step  
Epoch 47/100  
1099/1099 - 4s - loss: 882.9199 - mse: 882.9199 - mae: 22.5235 - val\_loss: 838.9565 - val\_mse: 838.9565 - val\_mae: 22.4163 - 4s/epoch - 4ms/step  
Epoch 48/100  
1099/1099 - 4s - loss: 880.2247 - mse: 880.2247 - mae: 22.4808 - val\_loss: 828.3627 - val\_mse: 828.3627 - val\_mae: 21.9053 - 4s/epoch - 4ms/step  
Epoch 49/100  
1099/1099 - 4s - loss: 882.0357 - mse: 882.0357 - mae: 22.5275 - val\_loss: 824.9416 - val\_mse: 824.9416 - val\_mae: 21.6962 - 4s/epoch - 4ms/step  
Epoch 50/100  
1099/1099 - 4s - loss: 878.8900 - mse: 878.8900 - mae: 22.4503 - val\_loss: 836.9022 - val\_mse: 836.9022 - val\_mae: 22.3382 - 4s/epoch - 4ms/step  
Epoch 51/100  
1099/1099 - 4s - loss: 879.7255 - mse: 879.7255 - mae: 22.4629 - val\_loss: 835.1640 - val\_mse: 835.1640 - val\_mae: 22.2699 - 4s/epoch - 4ms/step  
Epoch 52/100  
1099/1099 - 4s - loss: 877.6379 - mse: 877.6379 - mae: 22.4305 - val\_loss: 829.0507 - val\_mse: 829.0507 - val\_mae: 21.9642 - 4s/epoch - 4ms/step  
Epoch 53/100  
1099/1099 - 4s - loss: 880.6501 - mse: 880.6501 - mae: 22.4764 - val\_loss: 842.7697 - val\_mse: 842.7697 - val\_mae: 22.6122 - 4s/epoch - 4ms/step  
Epoch 54/100  
1099/1099 - 4s - loss: 881.2848 - mse: 881.2848 - mae: 22.4982 - val\_loss: 832.7761 - val\_mse: 832.7761 - val\_mae: 22.1298 - 4s/epoch - 4ms/step  
Epoch 55/100  
1099/1099 - 4s - loss: 879.0673 - mse: 879.0673 - mae: 22.4304 - val\_loss: 836.5302 - val\_mse: 836.5302 - val\_mae: 22.3081 - 4s/epoch - 4ms/step  
Epoch 56/100  
1099/1099 - 4s - loss: 879.0767 - mse: 879.0767 - mae: 22.4427 - val\_loss: 853.4482 - val\_mse: 853.4482 - val\_mae: 23.1327 - 4s/epoch - 4ms/step  
Epoch 57/100  
1099/1099 - 4s - loss: 880.5706 - mse: 880.5706 - mae: 22.4641 - val\_loss: 837.8795 - val\_mse: 837.8795 - val\_mae: 22.3676 - 4s/epoch - 4ms/step  
Epoch 58/100  
1099/1099 - 4s - loss: 880.8407 - mse: 880.8407 - mae: 22.4656 - val\_loss: 852.7392 - val\_mse: 852.7392 - val\_mae: 23.0645 - 4s/epoch - 4ms/step  
Epoch 59/100  
1099/1099 - 4s - loss: 880.1904 - mse: 880.1904 - mae: 22.4709 - val\_loss: 823.5907 - val\_mse: 823.5907 - val\_mae: 21.6428 - 4s/epoch - 4ms/step  
Epoch 60/100  
1099/1099 - 4s - loss: 880.9982 - mse: 880.9982 - mae: 22.4805 - val\_loss: 822.9285 - val\_mse: 822.9285 - val\_mae: 21.6193 - 4s/epoch - 4ms/step  
Epoch 61/100  
1099/1099 - 4s - loss: 880.8495 - mse: 880.8495 - mae: 22.4806 - val\_loss:

824.8497 - val\_mse: 824.8497 - val\_mae: 21.7019 - 4s/epoch - 4ms/step  
Epoch 62/100  
1099/1099 - 4s - loss: 878.2570 - mse: 878.2570 - mae: 22.4142 - val\_loss:  
830.9634 - val\_mse: 830.9634 - val\_mae: 22.0250 - 4s/epoch - 4ms/step  
Epoch 63/100  
1099/1099 - 4s - loss: 881.4324 - mse: 881.4324 - mae: 22.4871 - val\_loss:  
830.7517 - val\_mse: 830.7517 - val\_mae: 22.0347 - 4s/epoch - 4ms/step  
Epoch 64/100  
1099/1099 - 4s - loss: 880.1216 - mse: 880.1216 - mae: 22.4575 - val\_loss:  
849.9717 - val\_mse: 849.9717 - val\_mae: 22.9562 - 4s/epoch - 4ms/step  
Epoch 65/100  
1099/1099 - 4s - loss: 881.6135 - mse: 881.6135 - mae: 22.4920 - val\_loss:  
826.5235 - val\_mse: 826.5235 - val\_mae: 21.7921 - 4s/epoch - 4ms/step  
Epoch 66/100  
1099/1099 - 4s - loss: 879.6982 - mse: 879.6982 - mae: 22.4497 - val\_loss:  
830.3492 - val\_mse: 830.3492 - val\_mae: 21.9742 - 4s/epoch - 4ms/step  
Epoch 67/100  
1099/1099 - 4s - loss: 880.8947 - mse: 880.8947 - mae: 22.4778 - val\_loss:  
842.4539 - val\_mse: 842.4539 - val\_mae: 22.5978 - 4s/epoch - 4ms/step  
Epoch 68/100  
1099/1099 - 4s - loss: 881.3528 - mse: 881.3528 - mae: 22.4795 - val\_loss:  
841.3829 - val\_mse: 841.3829 - val\_mae: 22.5380 - 4s/epoch - 4ms/step  
Epoch 69/100  
1099/1099 - 4s - loss: 880.6152 - mse: 880.6152 - mae: 22.4847 - val\_loss:  
846.2258 - val\_mse: 846.2258 - val\_mae: 22.7775 - 4s/epoch - 4ms/step  
Epoch 70/100  
1099/1099 - 4s - loss: 880.5629 - mse: 880.5629 - mae: 22.4735 - val\_loss:  
829.1835 - val\_mse: 829.1835 - val\_mae: 21.9555 - 4s/epoch - 4ms/step  
Epoch 71/100  
1099/1099 - 4s - loss: 881.9399 - mse: 881.9399 - mae: 22.4781 - val\_loss:  
839.4707 - val\_mse: 839.4707 - val\_mae: 22.4263 - 4s/epoch - 4ms/step  
Epoch 72/100  
1099/1099 - 4s - loss: 878.0186 - mse: 878.0186 - mae: 22.4253 - val\_loss:  
830.9000 - val\_mse: 830.9000 - val\_mae: 22.0058 - 4s/epoch - 4ms/step  
Epoch 73/100  
1099/1099 - 4s - loss: 879.4535 - mse: 879.4535 - mae: 22.4430 - val\_loss:  
823.3269 - val\_mse: 823.3269 - val\_mae: 21.6363 - 4s/epoch - 4ms/step  
Epoch 74/100  
1099/1099 - 4s - loss: 878.3035 - mse: 878.3035 - mae: 22.4391 - val\_loss:  
847.6500 - val\_mse: 847.6500 - val\_mae: 22.8609 - 4s/epoch - 4ms/step  
Epoch 75/100  
1099/1099 - 5s - loss: 880.6989 - mse: 880.6989 - mae: 22.4596 - val\_loss:  
855.7896 - val\_mse: 855.7896 - val\_mae: 23.2300 - 5s/epoch - 4ms/step  
Epoch 76/100  
1099/1099 - 4s - loss: 878.9680 - mse: 878.9680 - mae: 22.4400 - val\_loss:  
833.0983 - val\_mse: 833.0983 - val\_mae: 22.1061 - 4s/epoch - 4ms/step  
Epoch 77/100  
1099/1099 - 4s - loss: 878.1439 - mse: 878.1439 - mae: 22.4103 - val\_loss:  
834.0148 - val\_mse: 834.0148 - val\_mae: 22.1716 - 4s/epoch - 4ms/step  
Epoch 78/100  
1099/1099 - 4s - loss: 878.9178 - mse: 878.9178 - mae: 22.4459 - val\_loss:  
840.4341 - val\_mse: 840.4341 - val\_mae: 22.4708 - 4s/epoch - 4ms/step  
Epoch 79/100  
1099/1099 - 4s - loss: 881.6538 - mse: 881.6538 - mae: 22.4938 - val\_loss:  
840.0453 - val\_mse: 840.0453 - val\_mae: 22.5002 - 4s/epoch - 4ms/step  
Epoch 80/100  
1099/1099 - 4s - loss: 877.8248 - mse: 877.8248 - mae: 22.3968 - val\_loss:  
834.0001 - val\_mse: 834.0001 - val\_mae: 22.1644 - 4s/epoch - 4ms/step  
Epoch 81/100  
1099/1099 - 4s - loss: 878.9767 - mse: 878.9767 - mae: 22.4150 - val\_loss:  
868.8397 - val\_mse: 868.8397 - val\_mae: 23.7490 - 4s/epoch - 4ms/step

Epoch 82/100

1099/1099 - 4s - loss: 880.4111 - mse: 880.4111 - mae: 22.4667 - val\_loss: 822.6824 - val\_mse: 822.6824 - val\_mae: 21.6050 - 4s/epoch - 4ms/step

Epoch 83/100

1099/1099 - 4s - loss: 879.4510 - mse: 879.4510 - mae: 22.4250 - val\_loss: 829.1599 - val\_mse: 829.1599 - val\_mae: 21.9442 - 4s/epoch - 4ms/step

Epoch 84/100

1099/1099 - 5s - loss: 878.5419 - mse: 878.5419 - mae: 22.4210 - val\_loss: 821.5220 - val\_mse: 821.5220 - val\_mae: 21.5652 - 5s/epoch - 4ms/step

Epoch 85/100

1099/1099 - 4s - loss: 878.0949 - mse: 878.0949 - mae: 22.4140 - val\_loss: 824.6714 - val\_mse: 824.6714 - val\_mae: 21.7010 - 4s/epoch - 4ms/step

Epoch 86/100

1099/1099 - 4s - loss: 879.2643 - mse: 879.2643 - mae: 22.4404 - val\_loss: 849.6341 - val\_mse: 849.6341 - val\_mae: 22.9205 - 4s/epoch - 4ms/step

Epoch 87/100

1099/1099 - 4s - loss: 881.6255 - mse: 881.6255 - mae: 22.4766 - val\_loss: 830.2352 - val\_mse: 830.2352 - val\_mae: 22.0048 - 4s/epoch - 4ms/step

Epoch 88/100

1099/1099 - 4s - loss: 879.6305 - mse: 879.6305 - mae: 22.4488 - val\_loss: 836.6354 - val\_mse: 836.6354 - val\_mae: 22.3263 - 4s/epoch - 4ms/step

Epoch 89/100

1099/1099 - 4s - loss: 877.6473 - mse: 877.6473 - mae: 22.3902 - val\_loss: 826.0939 - val\_mse: 826.0939 - val\_mae: 21.7755 - 4s/epoch - 4ms/step

Epoch 90/100

1099/1099 - 4s - loss: 878.8193 - mse: 878.8193 - mae: 22.4223 - val\_loss: 833.4097 - val\_mse: 833.4097 - val\_mae: 22.1936 - 4s/epoch - 4ms/step

Epoch 91/100

1099/1099 - 4s - loss: 881.9794 - mse: 881.9794 - mae: 22.4726 - val\_loss: 833.2241 - val\_mse: 833.2241 - val\_mae: 22.0776 - 4s/epoch - 4ms/step

Epoch 92/100

1099/1099 - 4s - loss: 878.5569 - mse: 878.5569 - mae: 22.4111 - val\_loss: 836.9597 - val\_mse: 836.9597 - val\_mae: 22.3393 - 4s/epoch - 4ms/step

Epoch 93/100

1099/1099 - 4s - loss: 880.2474 - mse: 880.2474 - mae: 22.4516 - val\_loss: 832.2734 - val\_mse: 832.2734 - val\_mae: 22.0982 - 4s/epoch - 4ms/step

Epoch 94/100

1099/1099 - 4s - loss: 879.4999 - mse: 879.4999 - mae: 22.4420 - val\_loss: 845.8476 - val\_mse: 845.8476 - val\_mae: 22.7722 - 4s/epoch - 4ms/step

Epoch 95/100

1099/1099 - 4s - loss: 879.0608 - mse: 879.0608 - mae: 22.4334 - val\_loss: 832.1371 - val\_mse: 832.1371 - val\_mae: 22.0705 - 4s/epoch - 4ms/step

Epoch 96/100

1099/1099 - 4s - loss: 878.5618 - mse: 878.5618 - mae: 22.4200 - val\_loss: 824.5312 - val\_mse: 824.5312 - val\_mae: 21.6768 - 4s/epoch - 4ms/step

Epoch 97/100

1099/1099 - 4s - loss: 879.6179 - mse: 879.6179 - mae: 22.4145 - val\_loss: 829.0139 - val\_mse: 829.0139 - val\_mae: 21.8888 - 4s/epoch - 4ms/step

Epoch 98/100

1099/1099 - 4s - loss: 880.7151 - mse: 880.7151 - mae: 22.4454 - val\_loss: 847.8813 - val\_mse: 847.8813 - val\_mae: 22.8244 - 4s/epoch - 4ms/step

Epoch 99/100

1099/1099 - 4s - loss: 880.1879 - mse: 880.1879 - mae: 22.4441 - val\_loss: 830.3206 - val\_mse: 830.3206 - val\_mae: 21.9879 - 4s/epoch - 4ms/step

Epoch 100/100

1099/1099 - 4s - loss: 878.7191 - mse: 878.7191 - mae: 22.4301 - val\_loss: 835.7827 - val\_mse: 835.7827 - val\_mae: 22.2809 - 4s/epoch - 4ms/step



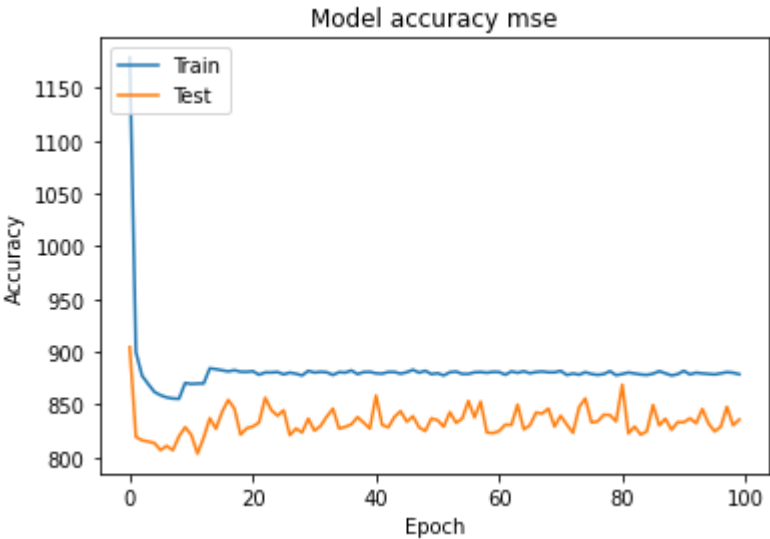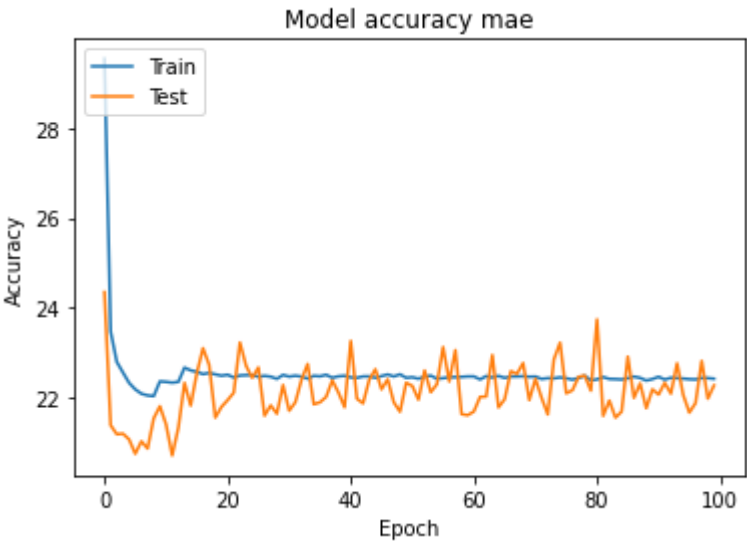

In [ ]:

```
print("Individual magnitude MLP")

layers = (400,200)
shape = (400,)
epochs = 100
model = create_mlp(shape, layers, True, "relu")
model.compile(loss='mean_squared_error', optimizer=opt, metrics=['mse', 'mae'])

history = model.fit(
    x= x_train_magnitude, y=y_train,
    validation_data=(x_test_magnitude, y_test),
    epochs=epochs, batch_size=32, verbose=2
)

display_graphs(history)
```

## Individual magnitude MLP

Epoch 1/100

2197/2197 - 7s - loss: 1220.6373 - mse: 1220.6373 - mae: 30.2625 - val\_loss: 1218.9465 - val\_mse: 1218.9465 - val\_mae: 30.2187 - 7s/epoch - 3ms/step

Epoch 2/100

2197/2197 - 7s - loss: 1216.0085 - mse: 1216.0085 - mae: 30.1885 - val\_loss: 1196.8971 - val\_mse: 1196.8971 - val\_mae: 29.8936 - 7s/epoch - 3ms/step

Epoch 3/100

2197/2197 - 7s - loss: 1152.6525 - mse: 1152.6525 - mae: 28.9940 - val\_loss: 1061.1669 - val\_mse: 1061.1669 - val\_mae: 27.3245 - 7s/epoch - 3ms/step

Epoch 4/100

2197/2197 - 7s - loss: 1068.0116 - mse: 1068.0116 - mae: 27.1898 - val\_loss: 978.9713 - val\_mse: 978.9713 - val\_mae: 25.6129 - 7s/epoch - 3ms/step

Epoch 5/100

2197/2197 - 7s - loss: 1030.2446 - mse: 1030.2446 - mae: 26.3127 - val\_loss: 986.0037 - val\_mse: 986.0037 - val\_mae: 25.6497 - 7s/epoch - 3ms/step

Epoch 6/100

2197/2197 - 7s - loss: 1010.0133 - mse: 1010.0133 - mae: 25.8316 - val\_loss: 980.3610 - val\_mse: 980.3610 - val\_mae: 25.4937 - 7s/epoch - 3ms/step

Epoch 7/100

2197/2197 - 7s - loss: 997.6404 - mse: 997.6404 - mae: 25.5606 - val\_loss: 935.4526 - val\_mse: 935.4526 - val\_mae: 24.6247 - 7s/epoch - 3ms/step

Epoch 8/100

2197/2197 - 13s - loss: 986.4278 - mse: 986.4278 - mae: 25.2992 - val\_loss: 925.9784 - val\_mse: 925.9784 - val\_mae: 24.4183 - 13s/epoch - 6ms/step

Epoch 9/100

2197/2197 - 9s - loss: 983.1481 - mse: 983.1481 - mae: 25.2403 - val\_loss: 904.5879 - val\_mse: 904.5879 - val\_mae: 23.9426 - 9s/epoch - 4ms/step

Epoch 10/100

2197/2197 - 7s - loss: 982.7324 - mse: 982.7324 - mae: 25.1803 - val\_loss: 912.0182 - val\_mse: 912.0182 - val\_mae: 24.1593 - 7s/epoch - 3ms/step

Epoch 11/100

2197/2197 - 7s - loss: 968.7799 - mse: 968.7799 - mae: 24.9324 - val\_loss: 900.6084 - val\_mse: 900.6084 - val\_mae: 23.8722 - 7s/epoch - 3ms/step

Epoch 12/100

2197/2197 - 7s - loss: 978.7709 - mse: 978.7709 - mae: 25.1101 - val\_loss: 934.4828 - val\_mse: 934.4828 - val\_mae: 24.6406 - 7s/epoch - 3ms/step

Epoch 13/100

2197/2197 - 7s - loss: 986.9827 - mse: 986.9827 - mae: 25.2653 - val\_loss: 902.5202 - val\_mse: 902.5202 - val\_mae: 23.9546 - 7s/epoch - 3ms/step

Epoch 14/100

2197/2197 - 7s - loss: 982.3340 - mse: 982.3340 - mae: 25.1776 - val\_loss: 938.5814 - val\_mse: 938.5814 - val\_mae: 24.7988 - 7s/epoch - 3ms/step

Epoch 15/100

2197/2197 - 7s - loss: 979.5126 - mse: 979.5126 - mae: 25.1234 - val\_loss: 897.5992 - val\_mse: 897.5992 - val\_mae: 23.8458 - 7s/epoch - 3ms/step

Epoch 16/100

2197/2197 - 7s - loss: 976.1513 - mse: 976.1513 - mae: 25.0438 - val\_loss: 891.4758 - val\_mse: 891.4758 - val\_mae: 23.7217 - 7s/epoch - 3ms/step

Epoch 17/100

2197/2197 - 7s - loss: 971.7663 - mse: 971.7663 - mae: 24.9445 - val\_loss: 920.3301 - val\_mse: 920.3301 - val\_mae: 24.3840 - 7s/epoch - 3ms/step

Epoch 18/100

2197/2197 - 7s - loss: 973.3300 - mse: 973.3300 - mae: 24.9805 - val\_loss: 898.9843 - val\_mse: 898.9843 - val\_mae: 23.9370 - 7s/epoch - 3ms/step

Epoch 19/100

2197/2197 - 7s - loss: 973.2189 - mse: 973.2189 - mae: 24.9990 - val\_loss: 905.6558 - val\_mse: 905.6558 - val\_mae: 23.9975 - 7s/epoch - 3ms/step

Epoch 20/100

2197/2197 - 7s - loss: 999.5718 - mse: 999.5718 - mae: 25.4761 - val\_loss: 985.5706 - val\_mse: 985.5706 - val\_mae: 25.7538 - 7s/epoch - 3ms/step

Epoch 21/100

2197/2197 - 7s - loss: 1023.7968 - mse: 1023.7968 - mae: 25.9482 - val\_loss: 983.4241 - val\_mse: 983.4241 - val\_mae: 25.6173 - 7s/epoch - 3ms/step

Epoch 22/100

2197/2197 - 7s - loss: 1017.2964 - mse: 1017.2964 - mae: 25.8141 - val\_loss: 927.4474 - val\_mse: 927.4474 - val\_mae: 24.5125 - 7s/epoch - 3ms/step

Epoch 23/100

2197/2197 - 7s - loss: 1016.0715 - mse: 1016.0715 - mae: 25.8071 - val\_loss: 934.1328 - val\_mse: 934.1328 - val\_mae: 24.7084 - 7s/epoch - 3ms/step

Epoch 24/100

2197/2197 - 7s - loss: 1012.7689 - mse: 1012.7689 - mae: 25.7165 - val\_loss: 918.1512 - val\_mse: 918.1512 - val\_mae: 24.3369 - 7s/epoch - 3ms/step

Epoch 25/100

2197/2197 - 7s - loss: 1011.0839 - mse: 1011.0839 - mae: 25.6804 - val\_loss: 918.0723 - val\_mse: 918.0723 - val\_mae: 24.3217 - 7s/epoch - 3ms/step

Epoch 26/100

2197/2197 - 7s - loss: 1012.3545 - mse: 1012.3545 - mae: 25.6886 - val\_loss: 917.8530 - val\_mse: 917.8530 - val\_mae: 24.2931 - 7s/epoch - 3ms/step

Epoch 27/100

2197/2197 - 7s - loss: 1009.7581 - mse: 1009.7581 - mae: 25.6412 - val\_loss: 910.4302 - val\_mse: 910.4302 - val\_mae: 24.1614 - 7s/epoch - 3ms/step

Epoch 28/100

2197/2197 - 7s - loss: 1012.8262 - mse: 1012.8262 - mae: 25.6997 - val\_loss: 932.7977 - val\_mse: 932.7977 - val\_mae: 24.7190 - 7s/epoch - 3ms/step

Epoch 29/100

2197/2197 - 7s - loss: 1010.5347 - mse: 1010.5347 - mae: 25.6573 - val\_loss: 932.4010 - val\_mse: 932.4010 - val\_mae: 24.7335 - 7s/epoch - 3ms/step

Epoch 30/100

2197/2197 - 7s - loss: 1010.1802 - mse: 1010.1802 - mae: 25.6424 - val\_loss: 928.6591 - val\_mse: 928.6591 - val\_mae: 24.5529 - 7s/epoch - 3ms/step

Epoch 31/100

2197/2197 - 7s - loss: 1007.7312 - mse: 1007.7312 - mae: 25.5945 - val\_loss: 944.3008 - val\_mse: 944.3008 - val\_mae: 24.9346 - 7s/epoch - 3ms/step

Epoch 32/100

2197/2197 - 8s - loss: 1008.8345 - mse: 1008.8345 - mae: 25.6261 - val\_loss: 930.0101 - val\_mse: 930.0101 - val\_mae: 24.7042 - 8s/epoch - 4ms/step

Epoch 33/100

2197/2197 - 7s - loss: 1011.8918 - mse: 1011.8918 - mae: 25.6846 - val\_loss: 912.3687 - val\_mse: 912.3687 - val\_mae: 24.1873 - 7s/epoch - 3ms/step

Epoch 34/100

2197/2197 - 8s - loss: 1004.7523 - mse: 1004.7523 - mae: 25.5321 - val\_loss: 923.6444 - val\_mse: 923.6444 - val\_mae: 24.4796 - 8s/epoch - 4ms/step

Epoch 35/100

2197/2197 - 7s - loss: 1007.9792 - mse: 1007.9792 - mae: 25.6274 - val\_loss: 914.7320 - val\_mse: 914.7320 - val\_mae: 24.2348 - 7s/epoch - 3ms/step

Epoch 36/100

2197/2197 - 7s - loss: 1006.1732 - mse: 1006.1732 - mae: 25.5567 - val\_loss: 940.6894 - val\_mse: 940.6894 - val\_mae: 24.8150 - 7s/epoch - 3ms/step

Epoch 37/100

2197/2197 - 7s - loss: 1006.4597 - mse: 1006.4597 - mae: 25.5609 - val\_loss: 918.2501 - val\_mse: 918.2501 - val\_mae: 24.3595 - 7s/epoch - 3ms/step

Epoch 38/100

2197/2197 - 8s - loss: 1003.6777 - mse: 1003.6777 - mae: 25.5143 - val\_loss: 912.5076 - val\_mse: 912.5076 - val\_mae: 24.1769 - 8s/epoch - 4ms/step

Epoch 39/100

2197/2197 - 7s - loss: 999.5818 - mse: 999.5818 - mae: 25.4275 - val\_loss: 907.7710 - val\_mse: 907.7710 - val\_mae: 24.0997 - 7s/epoch - 3ms/step

Epoch 40/100

2197/2197 - 7s - loss: 1003.1425 - mse: 1003.1425 - mae: 25.5002 - val\_loss: 905.2870 - val\_mse: 905.2870 - val\_mae: 24.0700 - 7s/epoch - 3ms/step

Epoch 41/100

2197/2197 - 7s - loss: 998.3092 - mse: 998.3092 - mae: 25.3973 - val\_loss: 926.6282 - val\_mse: 926.6282 - val\_mae: 24.5964 - 7s/epoch - 3ms/step  
Epoch 42/100  
2197/2197 - 7s - loss: 998.8284 - mse: 998.8284 - mae: 25.4055 - val\_loss: 923.0574 - val\_mse: 923.0574 - val\_mae: 24.4977 - 7s/epoch - 3ms/step  
Epoch 43/100  
2197/2197 - 7s - loss: 1000.2788 - mse: 1000.2788 - mae: 25.4519 - val\_loss: 913.4707 - val\_mse: 913.4707 - val\_mae: 24.2206 - 7s/epoch - 3ms/step  
Epoch 44/100  
2197/2197 - 8s - loss: 998.4695 - mse: 998.4695 - mae: 25.3746 - val\_loss: 910.7852 - val\_mse: 910.7852 - val\_mae: 24.1917 - 8s/epoch - 4ms/step  
Epoch 45/100  
2197/2197 - 7s - loss: 997.5363 - mse: 997.5363 - mae: 25.3973 - val\_loss: 907.7659 - val\_mse: 907.7659 - val\_mae: 24.1285 - 7s/epoch - 3ms/step  
Epoch 46/100  
2197/2197 - 7s - loss: 998.1850 - mse: 998.1850 - mae: 25.4033 - val\_loss: 918.6212 - val\_mse: 918.6212 - val\_mae: 24.3200 - 7s/epoch - 3ms/step  
Epoch 47/100  
2197/2197 - 7s - loss: 997.6413 - mse: 997.6413 - mae: 25.3979 - val\_loss: 941.8212 - val\_mse: 941.8212 - val\_mae: 24.9737 - 7s/epoch - 3ms/step  
Epoch 48/100  
2197/2197 - 7s - loss: 998.3562 - mse: 998.3562 - mae: 25.4156 - val\_loss: 910.5247 - val\_mse: 910.5247 - val\_mae: 24.1592 - 7s/epoch - 3ms/step  
Epoch 49/100  
2197/2197 - 8s - loss: 996.7648 - mse: 996.7648 - mae: 25.3557 - val\_loss: 917.5327 - val\_mse: 917.5327 - val\_mae: 24.3404 - 8s/epoch - 4ms/step  
Epoch 50/100  
2197/2197 - 7s - loss: 998.1552 - mse: 998.1552 - mae: 25.3861 - val\_loss: 919.1124 - val\_mse: 919.1124 - val\_mae: 24.3251 - 7s/epoch - 3ms/step  
Epoch 51/100  
2197/2197 - 7s - loss: 997.5471 - mse: 997.5471 - mae: 25.3974 - val\_loss: 928.0488 - val\_mse: 928.0488 - val\_mae: 24.4974 - 7s/epoch - 3ms/step  
Epoch 52/100  
2197/2197 - 7s - loss: 994.9979 - mse: 994.9979 - mae: 25.3442 - val\_loss: 913.8755 - val\_mse: 913.8755 - val\_mae: 24.1962 - 7s/epoch - 3ms/step  
Epoch 53/100  
2197/2197 - 7s - loss: 992.8383 - mse: 992.8383 - mae: 25.2706 - val\_loss: 918.1154 - val\_mse: 918.1154 - val\_mae: 24.3917 - 7s/epoch - 3ms/step  
Epoch 54/100  
2197/2197 - 7s - loss: 997.7430 - mse: 997.7430 - mae: 25.3737 - val\_loss: 901.3516 - val\_mse: 901.3516 - val\_mae: 23.9545 - 7s/epoch - 3ms/step  
Epoch 55/100  
2197/2197 - 8s - loss: 996.2393 - mse: 996.2393 - mae: 25.3292 - val\_loss: 935.8342 - val\_mse: 935.8342 - val\_mae: 24.7422 - 8s/epoch - 3ms/step  
Epoch 56/100  
2197/2197 - 7s - loss: 995.9583 - mse: 995.9583 - mae: 25.3528 - val\_loss: 908.8882 - val\_mse: 908.8882 - val\_mae: 24.1031 - 7s/epoch - 3ms/step  
Epoch 57/100  
2197/2197 - 7s - loss: 993.4190 - mse: 993.4190 - mae: 25.3040 - val\_loss: 909.2479 - val\_mse: 909.2479 - val\_mae: 24.1897 - 7s/epoch - 3ms/step  
Epoch 58/100  
2197/2197 - 7s - loss: 993.5285 - mse: 993.5285 - mae: 25.3242 - val\_loss: 912.6870 - val\_mse: 912.6870 - val\_mae: 24.1854 - 7s/epoch - 3ms/step  
Epoch 59/100  
2197/2197 - 7s - loss: 988.5712 - mse: 988.5712 - mae: 25.1983 - val\_loss: 907.7223 - val\_mse: 907.7223 - val\_mae: 24.0959 - 7s/epoch - 3ms/step  
Epoch 60/100  
2197/2197 - 8s - loss: 995.9176 - mse: 995.9176 - mae: 25.3601 - val\_loss: 918.9099 - val\_mse: 918.9099 - val\_mae: 24.3979 - 8s/epoch - 4ms/step  
Epoch 61/100  
2197/2197 - 7s - loss: 993.8567 - mse: 993.8567 - mae: 25.3058 - val\_loss:

910.0279 - val\_mse: 910.0279 - val\_mae: 24.0959 - 7s/epoch - 3ms/step  
Epoch 62/100  
2197/2197 - 8s - loss: 996.1813 - mse: 996.1813 - mae: 25.3472 - val\_loss:  
900.9333 - val\_mse: 900.9333 - val\_mae: 23.9662 - 8s/epoch - 4ms/step  
Epoch 63/100  
2197/2197 - 7s - loss: 991.1199 - mse: 991.1199 - mae: 25.2395 - val\_loss:  
903.6221 - val\_mse: 903.6221 - val\_mae: 24.0100 - 7s/epoch - 3ms/step  
Epoch 64/100  
2197/2197 - 8s - loss: 993.1451 - mse: 993.1451 - mae: 25.2704 - val\_loss:  
903.5701 - val\_mse: 903.5701 - val\_mae: 24.0437 - 8s/epoch - 3ms/step  
Epoch 65/100  
2197/2197 - 7s - loss: 993.4503 - mse: 993.4503 - mae: 25.2875 - val\_loss:  
919.0563 - val\_mse: 919.0563 - val\_mae: 24.3922 - 7s/epoch - 3ms/step  
Epoch 66/100  
2197/2197 - 7s - loss: 990.9920 - mse: 990.9920 - mae: 25.2494 - val\_loss:  
898.5410 - val\_mse: 898.5410 - val\_mae: 23.9278 - 7s/epoch - 3ms/step  
Epoch 67/100  
2197/2197 - 7s - loss: 992.4626 - mse: 992.4626 - mae: 25.2742 - val\_loss:  
897.3444 - val\_mse: 897.3444 - val\_mae: 23.8890 - 7s/epoch - 3ms/step  
Epoch 68/100  
2197/2197 - 7s - loss: 990.6195 - mse: 990.6195 - mae: 25.2285 - val\_loss:  
897.4887 - val\_mse: 897.4887 - val\_mae: 23.9209 - 7s/epoch - 3ms/step  
Epoch 69/100  
2197/2197 - 8s - loss: 991.0278 - mse: 991.0278 - mae: 25.2434 - val\_loss:  
902.6273 - val\_mse: 902.6273 - val\_mae: 24.0299 - 8s/epoch - 3ms/step  
Epoch 70/100  
2197/2197 - 7s - loss: 993.1011 - mse: 993.1011 - mae: 25.2949 - val\_loss:  
901.1216 - val\_mse: 901.1216 - val\_mae: 23.9260 - 7s/epoch - 3ms/step  
Epoch 71/100  
2197/2197 - 7s - loss: 987.8505 - mse: 987.8505 - mae: 25.1947 - val\_loss:  
892.8495 - val\_mse: 892.8495 - val\_mae: 23.7832 - 7s/epoch - 3ms/step  
Epoch 72/100  
2197/2197 - 7s - loss: 992.2344 - mse: 992.2344 - mae: 25.2663 - val\_loss:  
918.7436 - val\_mse: 918.7436 - val\_mae: 24.3624 - 7s/epoch - 3ms/step  
Epoch 73/100  
2197/2197 - 7s - loss: 992.0766 - mse: 992.0766 - mae: 25.2521 - val\_loss:  
901.6283 - val\_mse: 901.6283 - val\_mae: 23.9314 - 7s/epoch - 3ms/step  
Epoch 74/100  
2197/2197 - 7s - loss: 989.8717 - mse: 989.8717 - mae: 25.2114 - val\_loss:  
896.5222 - val\_mse: 896.5222 - val\_mae: 23.8403 - 7s/epoch - 3ms/step  
Epoch 75/100  
2197/2197 - 8s - loss: 989.3483 - mse: 989.3483 - mae: 25.2273 - val\_loss:  
908.3932 - val\_mse: 908.3932 - val\_mae: 24.1717 - 8s/epoch - 3ms/step  
Epoch 76/100  
2197/2197 - 7s - loss: 985.2496 - mse: 985.2496 - mae: 25.1423 - val\_loss:  
894.1533 - val\_mse: 894.1533 - val\_mae: 23.7985 - 7s/epoch - 3ms/step  
Epoch 77/100  
2197/2197 - 8s - loss: 986.7079 - mse: 986.7079 - mae: 25.1607 - val\_loss:  
889.3544 - val\_mse: 889.3544 - val\_mae: 23.6768 - 8s/epoch - 4ms/step  
Epoch 78/100  
2197/2197 - 8s - loss: 989.0031 - mse: 989.0031 - mae: 25.1850 - val\_loss:  
896.3224 - val\_mse: 896.3224 - val\_mae: 23.8319 - 8s/epoch - 3ms/step  
Epoch 79/100  
2197/2197 - 7s - loss: 986.9152 - mse: 986.9152 - mae: 25.1548 - val\_loss:  
926.1289 - val\_mse: 926.1289 - val\_mae: 24.5838 - 7s/epoch - 3ms/step  
Epoch 80/100  
2197/2197 - 7s - loss: 989.3970 - mse: 989.3970 - mae: 25.2002 - val\_loss:  
907.2451 - val\_mse: 907.2451 - val\_mae: 24.1412 - 7s/epoch - 3ms/step  
Epoch 81/100  
2197/2197 - 7s - loss: 985.9930 - mse: 985.9930 - mae: 25.1709 - val\_loss:  
896.3280 - val\_mse: 896.3280 - val\_mae: 23.8586 - 7s/epoch - 3ms/step

Epoch 82/100

2197/2197 - 7s - loss: 986.7072 - mse: 986.7072 - mae: 25.1688 - val\_loss: 904.1029 - val\_mse: 904.1029 - val\_mae: 24.0237 - 7s/epoch - 3ms/step

Epoch 83/100

2197/2197 - 7s - loss: 987.1023 - mse: 987.1023 - mae: 25.1662 - val\_loss: 894.9587 - val\_mse: 894.9587 - val\_mae: 23.8078 - 7s/epoch - 3ms/step

Epoch 84/100

2197/2197 - 7s - loss: 987.5228 - mse: 987.5228 - mae: 25.1787 - val\_loss: 902.3145 - val\_mse: 902.3145 - val\_mae: 23.9887 - 7s/epoch - 3ms/step

Epoch 85/100

2197/2197 - 7s - loss: 985.5182 - mse: 985.5182 - mae: 25.1416 - val\_loss: 904.7166 - val\_mse: 904.7166 - val\_mae: 24.0728 - 7s/epoch - 3ms/step

Epoch 86/100

2197/2197 - 7s - loss: 987.4702 - mse: 987.4702 - mae: 25.1889 - val\_loss: 927.7195 - val\_mse: 927.7195 - val\_mae: 24.6566 - 7s/epoch - 3ms/step

Epoch 87/100

2197/2197 - 7s - loss: 988.5541 - mse: 988.5541 - mae: 25.1987 - val\_loss: 909.8726 - val\_mse: 909.8726 - val\_mae: 24.2435 - 7s/epoch - 3ms/step

Epoch 88/100

2197/2197 - 7s - loss: 987.1520 - mse: 987.1520 - mae: 25.1684 - val\_loss: 901.6262 - val\_mse: 901.6262 - val\_mae: 23.9352 - 7s/epoch - 3ms/step

Epoch 89/100

2197/2197 - 7s - loss: 985.6617 - mse: 985.6617 - mae: 25.1493 - val\_loss: 911.7567 - val\_mse: 911.7567 - val\_mae: 24.1525 - 7s/epoch - 3ms/step

Epoch 90/100

2197/2197 - 8s - loss: 983.7745 - mse: 983.7745 - mae: 25.0981 - val\_loss: 929.5363 - val\_mse: 929.5363 - val\_mae: 24.6085 - 8s/epoch - 4ms/step

Epoch 91/100

2197/2197 - 7s - loss: 989.4543 - mse: 989.4543 - mae: 25.2180 - val\_loss: 907.2532 - val\_mse: 907.2532 - val\_mae: 24.1001 - 7s/epoch - 3ms/step

Epoch 92/100

2197/2197 - 8s - loss: 985.8809 - mse: 985.8809 - mae: 25.1339 - val\_loss: 892.8086 - val\_mse: 892.8086 - val\_mae: 23.8079 - 8s/epoch - 4ms/step

Epoch 93/100

2197/2197 - 7s - loss: 986.0638 - mse: 986.0638 - mae: 25.1559 - val\_loss: 899.8484 - val\_mse: 899.8484 - val\_mae: 23.9512 - 7s/epoch - 3ms/step

Epoch 94/100

2197/2197 - 7s - loss: 987.6514 - mse: 987.6514 - mae: 25.1792 - val\_loss: 893.2443 - val\_mse: 893.2443 - val\_mae: 23.7405 - 7s/epoch - 3ms/step

Epoch 95/100

2197/2197 - 7s - loss: 982.4953 - mse: 982.4953 - mae: 25.0893 - val\_loss: 895.9167 - val\_mse: 895.9167 - val\_mae: 23.8608 - 7s/epoch - 3ms/step

Epoch 96/100

2197/2197 - 8s - loss: 985.5306 - mse: 985.5306 - mae: 25.1299 - val\_loss: 905.2233 - val\_mse: 905.2233 - val\_mae: 24.0854 - 8s/epoch - 4ms/step

Epoch 97/100

2197/2197 - 8s - loss: 981.7521 - mse: 981.7521 - mae: 25.0513 - val\_loss: 887.9090 - val\_mse: 887.9090 - val\_mae: 23.6487 - 8s/epoch - 4ms/step

Epoch 98/100

2197/2197 - 7s - loss: 981.4842 - mse: 981.4842 - mae: 25.0603 - val\_loss: 916.4025 - val\_mse: 916.4025 - val\_mae: 24.3456 - 7s/epoch - 3ms/step

Epoch 99/100

2197/2197 - 7s - loss: 979.0071 - mse: 979.0071 - mae: 25.0200 - val\_loss: 905.7991 - val\_mse: 905.7991 - val\_mae: 24.0860 - 7s/epoch - 3ms/step

Epoch 100/100

2197/2197 - 7s - loss: 983.0318 - mse: 983.0318 - mae: 25.0796 - val\_loss: 897.9091 - val\_mse: 897.9091 - val\_mae: 23.9299 - 7s/epoch - 3ms/step

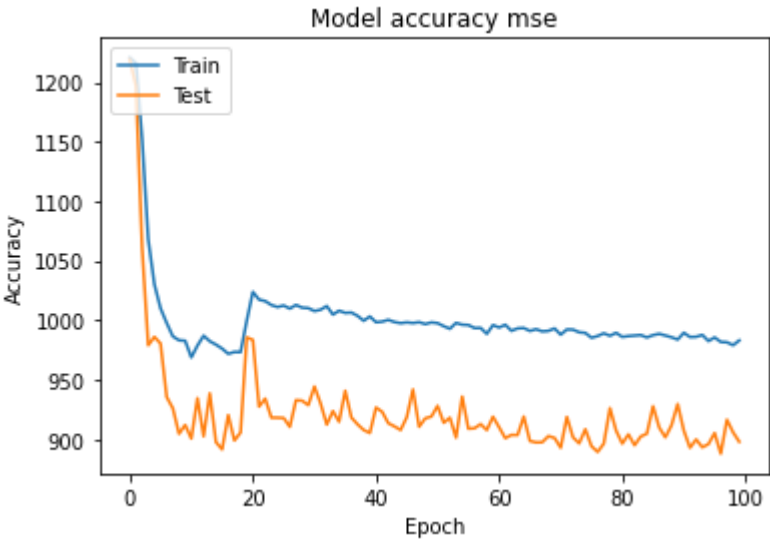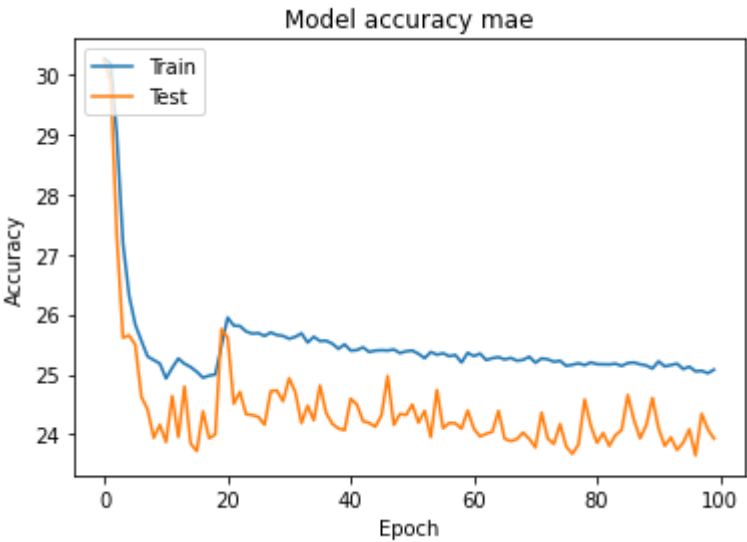



In [ ]:

```
print("Individual phase 1D CNN")

shape=(400,1)
filters=(16,16)
layers=(100,)
epochs = 25
model = create_1d_cnn(shape, True, filters, layers, 'relu')
model.compile(loss='mean_squared_error', optimizer=opt, metrics=['mse','mae'])

history = model.fit(
    x= x_train_phase, y=y_train,
    validation_data=(x_test_phase, y_test),
    epochs=epochs, batch_size=32, verbose=2
)

display_graphs(history)
```

## Individual phase 1D CNN

Epoch 1/25

2197/2197 - 21s - loss: 1220.6075 - mse: 1220.6075 - mae: 30.2637 - val\_loss: 1219.1757 - val\_mse: 1219.1757 - val\_mae: 30.2259 - 21s/epoch - 10ms/step

Epoch 2/25

2197/2197 - 21s - loss: 1220.5579 - mse: 1220.5579 - mae: 30.2631 - val\_loss: 1219.1754 - val\_mse: 1219.1754 - val\_mae: 30.2260 - 21s/epoch - 10ms/step

Epoch 3/25

2197/2197 - 21s - loss: 1220.5598 - mse: 1220.5598 - mae: 30.2630 - val\_loss: 1219.1742 - val\_mse: 1219.1742 - val\_mae: 30.2258 - 21s/epoch - 10ms/step

Epoch 4/25

2197/2197 - 21s - loss: 1220.5596 - mse: 1220.5596 - mae: 30.2631 - val\_loss: 1219.1736 - val\_mse: 1219.1736 - val\_mae: 30.2258 - 21s/epoch - 10ms/step

Epoch 5/25

2197/2197 - 21s - loss: 1220.5566 - mse: 1220.5566 - mae: 30.2630 - val\_loss: 1219.1742 - val\_mse: 1219.1742 - val\_mae: 30.2258 - 21s/epoch - 10ms/step

Epoch 6/25

2197/2197 - 22s - loss: 1220.5583 - mse: 1220.5583 - mae: 30.2629 - val\_loss: 1219.1753 - val\_mse: 1219.1753 - val\_mae: 30.2259 - 22s/epoch - 10ms/step

Epoch 7/25

2197/2197 - 22s - loss: 1220.5588 - mse: 1220.5588 - mae: 30.2629 - val\_loss: 1219.1743 - val\_mse: 1219.1743 - val\_mae: 30.2258 - 22s/epoch - 10ms/step

Epoch 8/25

2197/2197 - 22s - loss: 1220.5564 - mse: 1220.5564 - mae: 30.2630 - val\_loss: 1219.1757 - val\_mse: 1219.1757 - val\_mae: 30.2258 - 22s/epoch - 10ms/step

Epoch 9/25

2197/2197 - 23s - loss: 1220.5559 - mse: 1220.5559 - mae: 30.2629 - val\_loss: 1219.1746 - val\_mse: 1219.1746 - val\_mae: 30.2258 - 23s/epoch - 11ms/step

Epoch 10/25

2197/2197 - 22s - loss: 1220.5565 - mse: 1220.5565 - mae: 30.2629 - val\_loss: 1219.1757 - val\_mse: 1219.1757 - val\_mae: 30.2258 - 22s/epoch - 10ms/step

Epoch 11/25

2197/2197 - 22s - loss: 1220.5562 - mse: 1220.5562 - mae: 30.2629 - val\_loss: 1219.1742 - val\_mse: 1219.1742 - val\_mae: 30.2258 - 22s/epoch - 10ms/step

Epoch 12/25

2197/2197 - 23s - loss: 1220.5569 - mse: 1220.5569 - mae: 30.2628 - val\_loss: 1219.1744 - val\_mse: 1219.1744 - val\_mae: 30.2258 - 23s/epoch - 10ms/step

Epoch 13/25

2197/2197 - 23s - loss: 1220.5562 - mse: 1220.5562 - mae: 30.2629 - val\_loss: 1219.1737 - val\_mse: 1219.1737 - val\_mae: 30.2258 - 23s/epoch - 10ms/step

Epoch 14/25

2197/2197 - 23s - loss: 1220.5546 - mse: 1220.5546 - mae: 30.2630 - val\_loss: 1219.1730 - val\_mse: 1219.1730 - val\_mae: 30.2258 - 23s/epoch - 10ms/step

Epoch 15/25

2197/2197 - 22s - loss: 1220.5568 - mse: 1220.5568 - mae: 30.2629 - val\_loss: 1219.1731 - val\_mse: 1219.1731 - val\_mae: 30.2258 - 22s/epoch - 10ms/step

Epoch 16/25

2197/2197 - 22s - loss: 1220.5562 - mse: 1220.5562 - mae: 30.2629 - val\_loss: 1219.1746 - val\_mse: 1219.1746 - val\_mae: 30.2259 - 22s/epoch - 10ms/step

Epoch 17/25

2197/2197 - 22s - loss: 1220.5551 - mse: 1220.5551 - mae: 30.2629 - val\_loss: 1219.1757 - val\_mse: 1219.1757 - val\_mae: 30.2259 - 22s/epoch - 10ms/step

Epoch 18/25

2197/2197 - 23s - loss: 1220.5573 - mse: 1220.5573 - mae: 30.2630 - val\_loss: 1219.1754 - val\_mse: 1219.1754 - val\_mae: 30.2258 - 23s/epoch - 11ms/step

Epoch 19/25

2197/2197 - 22s - loss: 1220.5560 - mse: 1220.5560 - mae: 30.2630 - val\_loss: 1219.1753 - val\_mse: 1219.1753 - val\_mae: 30.2258 - 22s/epoch - 10ms/step

Epoch 20/25

2197/2197 - 22s - loss: 1220.5544 - mse: 1220.5544 - mae: 30.2629 - val\_loss: 1219.1731 - val\_mse: 1219.1731 - val\_mae: 30.2258 - 22s/epoch - 10ms/step

Epoch 21/25

2197/2197 - 21s - loss: 1220.5579 - mse: 1220.5579 - mae: 30.2629 - val\_loss: 1219.1744 - val\_mse: 1219.1744 - val\_mae: 30.2258 - 21s/epoch - 10ms/step

Epoch 22/25

2197/2197 - 22s - loss: 1220.5577 - mse: 1220.5577 - mae: 30.2629 - val\_loss: 1219.1746 - val\_mse: 1219.1746 - val\_mae: 30.2258 - 22s/epoch - 10ms/step

Epoch 23/25

2197/2197 - 22s - loss: 1220.5570 - mse: 1220.5570 - mae: 30.2629 - val\_loss: 1219.1742 - val\_mse: 1219.1742 - val\_mae: 30.2258 - 22s/epoch - 10ms/step

Epoch 24/25

2197/2197 - 23s - loss: 1220.5570 - mse: 1220.5570 - mae: 30.2629 - val\_loss: 1219.1744 - val\_mse: 1219.1744 - val\_mae: 30.2258 - 23s/epoch - 10ms/step

Epoch 25/25

2197/2197 - 22s - loss: 1220.5569 - mse: 1220.5569 - mae: 30.2629 - val\_loss: 1219.1744 - val\_mse: 1219.1744 - val\_mae: 30.2259 - 22s/epoch - 10ms/step

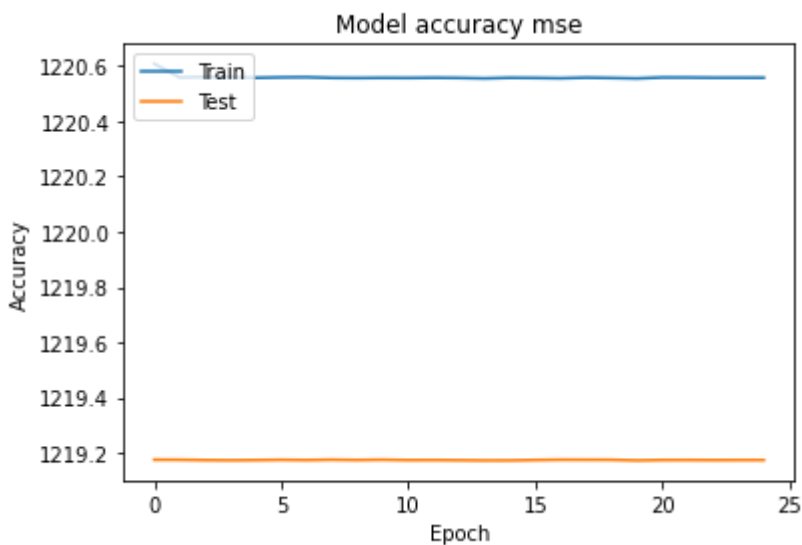

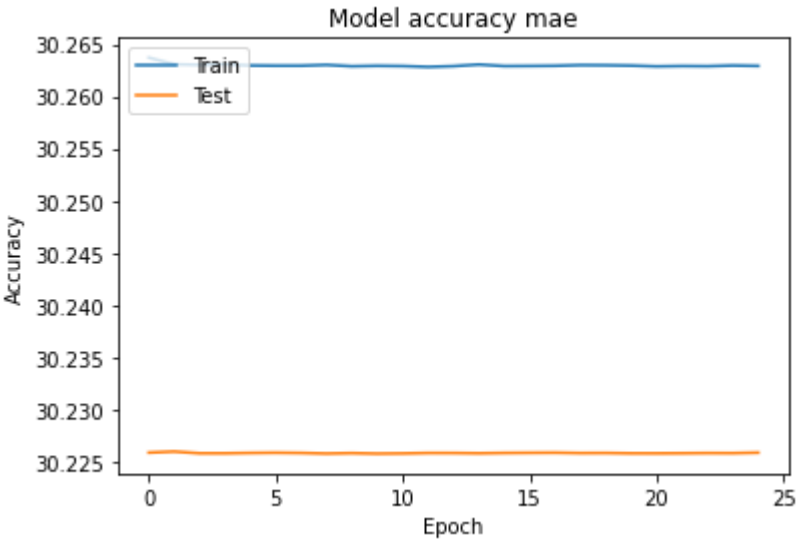

In [ ]:

```
print("Individual magnitude 1D CNN")
shape=(400,1)
filters=(64,64)
layers=(100,)
epochs = 25
model = create_1d_cnn(shape, True, filters, layers, 'relu')
model.compile(loss='mean_squared_error', optimizer=opt, metrics=['mse','mae'])

history = model.fit(
    x= x_train_magnitude, y=y_train,
    validation_data=(x_test_magnitude, y_test),
    epochs=epochs, batch_size=32, verbose=2
)

display_graphs(history)
```

## Individual magnitude 1D CNN

Epoch 1/25

2197/2197 - 51s - loss: 1120.1287 - mse: 1120.1287 - mae: 28.2986 - val\_loss: 913.3382 - val\_mse: 913.3382 - val\_mae: 24.1304 - 51s/epoch - 23ms/step

Epoch 2/25

2197/2197 - 50s - loss: 932.9537 - mse: 932.9537 - mae: 24.4868 - val\_loss: 862.9015 - val\_mse: 862.9015 - val\_mae: 22.8238 - 50s/epoch - 23ms/step

Epoch 3/25

2197/2197 - 50s - loss: 895.5186 - mse: 895.5186 - mae: 23.5713 - val\_loss: 834.2013 - val\_mse: 834.2013 - val\_mae: 21.9902 - 50s/epoch - 23ms/step

Epoch 4/25

2197/2197 - 51s - loss: 874.1041 - mse: 874.1041 - mae: 23.0520 - val\_loss: 820.6949 - val\_mse: 820.6949 - val\_mae: 21.4930 - 51s/epoch - 23ms/step

Epoch 5/25

2197/2197 - 53s - loss: 866.4921 - mse: 866.4921 - mae: 22.8113 - val\_loss: 813.8534 - val\_mse: 813.8534 - val\_mae: 21.2469 - 53s/epoch - 24ms/step

Epoch 6/25

2197/2197 - 50s - loss: 856.9814 - mse: 856.9814 - mae: 22.5688 - val\_loss: 808.2625 - val\_mse: 808.2625 - val\_mae: 21.0133 - 50s/epoch - 23ms/step

Epoch 7/25

2197/2197 - 51s - loss: 851.4037 - mse: 851.4037 - mae: 22.4022 - val\_loss: 805.3831 - val\_mse: 805.3831 - val\_mae: 20.9573 - 51s/epoch - 23ms/step

Epoch 8/25

2197/2197 - 51s - loss: 840.9355 - mse: 840.9355 - mae: 22.1333 - val\_loss: 801.5881 - val\_mse: 801.5881 - val\_mae: 20.8105 - 51s/epoch - 23ms/step

Epoch 9/25

2197/2197 - 51s - loss: 838.3653 - mse: 838.3653 - mae: 22.0384 - val\_loss: 800.7048 - val\_mse: 800.7048 - val\_mae: 20.7677 - 51s/epoch - 23ms/step

Epoch 10/25

2197/2197 - 51s - loss: 834.2053 - mse: 834.2053 - mae: 21.9143 - val\_loss: 801.0242 - val\_mse: 801.0242 - val\_mae: 20.8528 - 51s/epoch - 23ms/step

Epoch 11/25

2197/2197 - 50s - loss: 830.5430 - mse: 830.5430 - mae: 21.8417 - val\_loss: 796.0657 - val\_mse: 796.0657 - val\_mae: 20.5832 - 50s/epoch - 23ms/step

Epoch 12/25

2197/2197 - 51s - loss: 829.5330 - mse: 829.5330 - mae: 21.7844 - val\_loss: 797.8635 - val\_mse: 797.8635 - val\_mae: 20.7466 - 51s/epoch - 23ms/step

Epoch 13/25

2197/2197 - 50s - loss: 826.0372 - mse: 826.0372 - mae: 21.6993 - val\_loss: 795.3427 - val\_mse: 795.3427 - val\_mae: 20.6273 - 50s/epoch - 23ms/step

Epoch 14/25

2197/2197 - 51s - loss: 826.6191 - mse: 826.6191 - mae: 21.6913 - val\_loss: 799.6348 - val\_mse: 799.6348 - val\_mae: 20.8334 - 51s/epoch - 23ms/step

Epoch 15/25

2197/2197 - 51s - loss: 825.0281 - mse: 825.0281 - mae: 21.6495 - val\_loss: 801.2826 - val\_mse: 801.2826 - val\_mae: 21.0084 - 51s/epoch - 23ms/step

Epoch 16/25

2197/2197 - 50s - loss: 822.9753 - mse: 822.9753 - mae: 21.6143 - val\_loss: 795.8555 - val\_mse: 795.8555 - val\_mae: 20.6550 - 50s/epoch - 23ms/step

Epoch 17/25

2197/2197 - 51s - loss: 821.3815 - mse: 821.3815 - mae: 21.5776 - val\_loss: 800.6804 - val\_mse: 800.6804 - val\_mae: 20.9395 - 51s/epoch - 23ms/step

Epoch 18/25

2197/2197 - 50s - loss: 821.6725 - mse: 821.6725 - mae: 21.5829 - val\_loss: 796.1881 - val\_mse: 796.1881 - val\_mae: 20.7546 - 50s/epoch - 23ms/step

Epoch 19/25

2197/2197 - 51s - loss: 821.3787 - mse: 821.3787 - mae: 21.5713 - val\_loss: 802.3741 - val\_mse: 802.3741 - val\_mae: 21.0305 - 51s/epoch - 23ms/step

Epoch 20/25

2197/2197 - 51s - loss: 819.6779 - mse: 819.6779 - mae: 21.5514 - val\_loss:

s: 793.5825 - val\_mse: 793.5825 - val\_mae: 20.6188 - 51s/epoch - 23ms/step  
 Epoch 21/25  
 2197/2197 - 50s - loss: 817.4601 - mse: 817.4601 - mae: 21.5138 - val\_loss: 792.6459 - val\_mse: 792.6459 - val\_mae: 20.6114 - 50s/epoch - 23ms/step  
 Epoch 22/25  
 2197/2197 - 50s - loss: 818.3578 - mse: 818.3578 - mae: 21.5005 - val\_loss: 790.5941 - val\_mse: 790.5941 - val\_mae: 20.4639 - 50s/epoch - 23ms/step  
 Epoch 23/25  
 2197/2197 - 50s - loss: 816.2393 - mse: 816.2393 - mae: 21.4695 - val\_loss: 793.6315 - val\_mse: 793.6315 - val\_mae: 20.6838 - 50s/epoch - 23ms/step  
 Epoch 24/25  
 2197/2197 - 52s - loss: 817.1477 - mse: 817.1477 - mae: 21.4697 - val\_loss: 798.6484 - val\_mse: 798.6484 - val\_mae: 20.9894 - 52s/epoch - 24ms/step  
 Epoch 25/25  
 2197/2197 - 51s - loss: 815.9229 - mse: 815.9229 - mae: 21.4668 - val\_loss: 790.3333 - val\_mse: 790.3333 - val\_mae: 20.5262 - 51s/epoch - 23ms/step

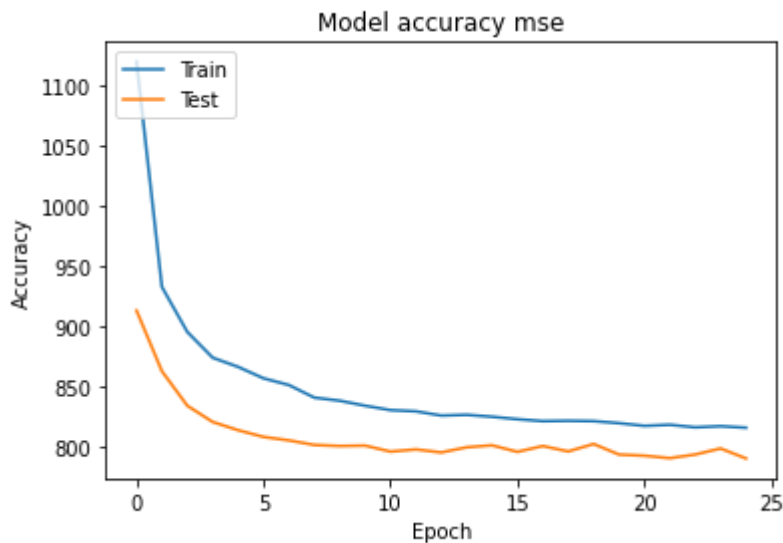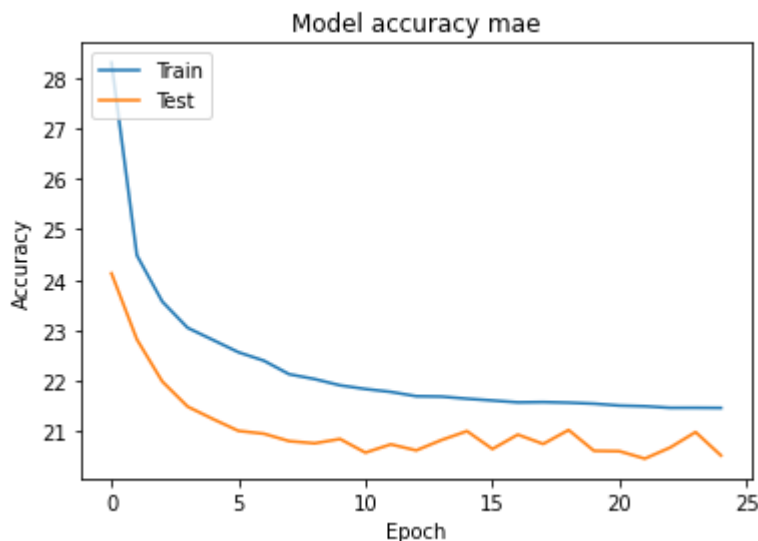

## 2D CNN

The 2D CNN will only be performed against the data from the 2-by-2 antenna without PCA. Dimensionality reduction conflicts with the 2D CNN.

In [ ]:

```
antenna_num = 2

magnitude = pd.read_csv('/content/drive/MyDrive/train_magnitude.csv', header=None).to_numpy()
output_data = pd.read_csv('/content/drive/MyDrive/train_outputs.csv', header=None).to_numpy()
phase = pd.read_csv('/content/drive/MyDrive/train_phase.csv', header=None).to_numpy()

data = load_data_cnn(phase, magnitude, output_data, antenna_num)
phase_data = data[0]
magnitude_data = data[1]
output_data = data[2]

data_split = split_test_train(phase_data, magnitude_data, output_data, 0.4)
x_train_magnitude = data_split[0]
x_test_magnitude = data_split[1]
x_train_phase = data_split[2]
x_test_phase = data_split[3]
y_train = data_split[4][:,0:2]
y_test = data_split[5][:,0:2]
```



In [ ]:

```
epochs = 25
filters=(64,32,16)
lr = 0.001
opt = Adam(learning_rate=lr)
regress=False

phase = create_2d_cnn(100, 4, 1, filters, regress, "relu")
magnitude = create_2d_cnn(100, 4, 1, filters, regress, "relu")

model = combine_models(phase, magnitude, (10,))
model.compile(loss='mean_squared_error', optimizer=opt, metrics=['mse', 'mae'])

history = model.fit(
x=[x_train_magnitude, x_train_phase], y=y_train,
  validation_data=(x_test_magnitude, x_test_phase), y_test),
  epochs=epochs, batch_size=64, verbose=2
)

display_graphs(history)
```

Epoch 1/25

1099/1099 - 162s - loss: 870.2733 - mse: 870.2733 - mae: 22.5217 - val\_loss: 797.9747 - val\_mse: 797.9747 - val\_mae: 20.3381 - 162s/epoch - 148ms/step

Epoch 2/25

1099/1099 - 162s - loss: 786.3965 - mse: 786.3965 - mae: 20.5208 - val\_loss: 733.0698 - val\_mse: 733.0698 - val\_mae: 18.4851 - 162s/epoch - 147ms/step

Epoch 3/25

1099/1099 - 161s - loss: 750.9487 - mse: 750.9487 - mae: 19.8003 - val\_loss: 705.0529 - val\_mse: 705.0529 - val\_mae: 17.7261 - 161s/epoch - 147ms/step

Epoch 4/25

1099/1099 - 162s - loss: 725.7965 - mse: 725.7965 - mae: 19.3114 - val\_loss: 742.4571 - val\_mse: 742.4571 - val\_mae: 17.8547 - 162s/epoch - 147ms/step

Epoch 5/25

1099/1099 - 162s - loss: 713.2769 - mse: 713.2769 - mae: 19.0653 - val\_loss: 652.0582 - val\_mse: 652.0582 - val\_mae: 16.9853 - 162s/epoch - 147ms/step

Epoch 6/25

1099/1099 - 161s - loss: 695.9887 - mse: 695.9887 - mae: 18.6012 - val\_loss: 636.5539 - val\_mse: 636.5539 - val\_mae: 16.4625 - 161s/epoch - 147ms/step

Epoch 7/25

1099/1099 - 160s - loss: 666.6690 - mse: 666.6690 - mae: 17.9857 - val\_loss: 674.7387 - val\_mse: 674.7387 - val\_mae: 15.7624 - 160s/epoch - 146ms/step

Epoch 8/25

1099/1099 - 166s - loss: 642.1755 - mse: 642.1755 - mae: 17.4326 - val\_loss: 574.9975 - val\_mse: 574.9975 - val\_mae: 15.3500 - 166s/epoch - 151ms/step

Epoch 9/25

1099/1099 - 169s - loss: 624.6741 - mse: 624.6741 - mae: 17.0023 - val\_loss: 676.9548 - val\_mse: 676.9548 - val\_mae: 16.0798 - 169s/epoch - 154ms/step

Epoch 10/25

1099/1099 - 162s - loss: 608.9497 - mse: 608.9497 - mae: 16.6586 - val\_loss: 559.1422 - val\_mse: 559.1422 - val\_mae: 16.2003 - 162s/epoch - 147ms/step

Epoch 11/25

1099/1099 - 159s - loss: 594.8096 - mse: 594.8096 - mae: 16.3499 - val\_loss: 530.0433 - val\_mse: 530.0433 - val\_mae: 13.8758 - 159s/epoch - 145ms/step

Epoch 12/25

1099/1099 - 172s - loss: 583.2604 - mse: 583.2604 - mae: 16.0808 - val\_loss: 568.7039 - val\_mse: 568.7039 - val\_mae: 14.2374 - 172s/epoch - 156ms/step

Epoch 13/25

1099/1099 - 161s - loss: 569.9501 - mse: 569.9501 - mae: 15.8216 - val\_loss: 559.3549 - val\_mse: 559.3549 - val\_mae: 14.1040 - 161s/epoch - 147ms/step

Epoch 14/25

1099/1099 - 163s - loss: 560.2957 - mse: 560.2957 - mae: 15.5810 - val\_loss: 496.3221 - val\_mse: 496.3221 - val\_mae: 13.1305 - 163s/epoch - 148ms/step

Epoch 15/25

1099/1099 - 160s - loss: 541.7988 - mse: 541.7988 - mae: 15.2525 - val\_loss: 455.3860 - val\_mse: 455.3860 - val\_mae: 12.6816 - 160s/epoch - 146ms/step

Epoch 16/25

1099/1099 - 161s - loss: 525.4434 - mse: 525.4434 - mae: 14.9711 - val\_loss: 433.7357 - val\_mse: 433.7357 - val\_mae: 12.3270 - 161s/epoch - 146ms/step  
 Epoch 17/25  
 1099/1099 - 161s - loss: 506.6176 - mse: 506.6176 - mae: 14.5604 - val\_loss: 499.0404 - val\_mse: 499.0404 - val\_mae: 13.6676 - 161s/epoch - 147ms/step  
 Epoch 18/25  
 1099/1099 - 164s - loss: 489.4137 - mse: 489.4137 - mae: 14.2042 - val\_loss: 361.6404 - val\_mse: 361.6404 - val\_mae: 10.8939 - 164s/epoch - 149ms/step  
 Epoch 19/25  
 1099/1099 - 161s - loss: 475.5882 - mse: 475.5882 - mae: 13.8938 - val\_loss: 375.7463 - val\_mse: 375.7463 - val\_mae: 11.6199 - 161s/epoch - 147ms/step  
 Epoch 20/25  
 1099/1099 - 162s - loss: 462.8652 - mse: 462.8652 - mae: 13.6296 - val\_loss: 373.2402 - val\_mse: 373.2402 - val\_mae: 11.1745 - 162s/epoch - 147ms/step  
 Epoch 21/25  
 1099/1099 - 163s - loss: 454.0345 - mse: 454.0345 - mae: 13.4640 - val\_loss: 423.5359 - val\_mse: 423.5359 - val\_mae: 12.4048 - 163s/epoch - 148ms/step  
 Epoch 22/25  
 1099/1099 - 162s - loss: 453.3568 - mse: 453.3568 - mae: 13.3697 - val\_loss: 380.0341 - val\_mse: 380.0341 - val\_mae: 10.5552 - 162s/epoch - 147ms/step  
 Epoch 23/25  
 1099/1099 - 161s - loss: 442.4781 - mse: 442.4781 - mae: 13.2035 - val\_loss: 367.8569 - val\_mse: 367.8569 - val\_mae: 10.7696 - 161s/epoch - 147ms/step  
 Epoch 24/25  
 1099/1099 - 161s - loss: 436.4580 - mse: 436.4580 - mae: 13.0884 - val\_loss: 445.0382 - val\_mse: 445.0382 - val\_mae: 11.7053 - 161s/epoch - 146ms/step  
 Epoch 25/25  
 1099/1099 - 162s - loss: 429.0586 - mse: 429.0586 - mae: 12.9287 - val\_loss: 376.2139 - val\_mse: 376.2139 - val\_mae: 10.3018 - 162s/epoch - 148ms/step

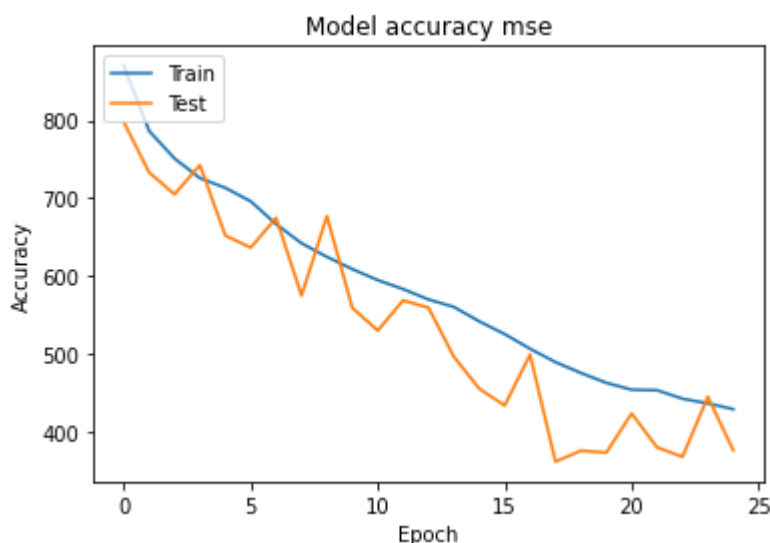

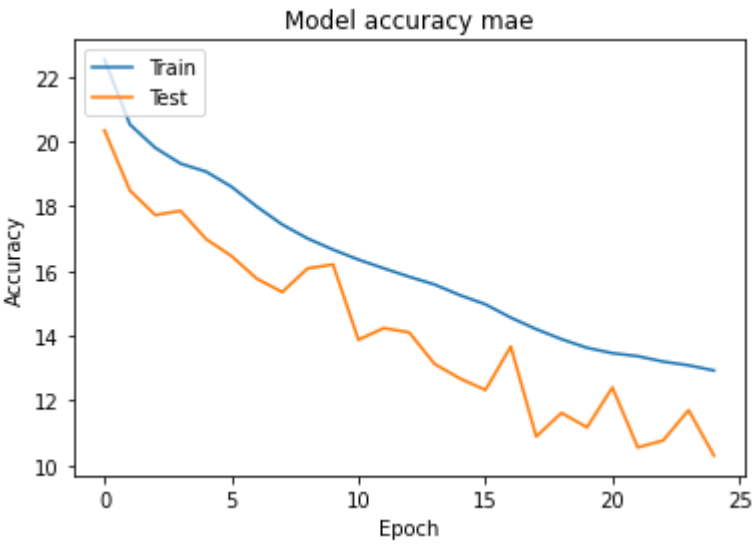

In [ ]:

```
antenna_num = 2
epochs = 25
filters=(64,32,16)
lr = 0.001
opt = Adam(learning_rate=lr)
regress=True

model = create_2d_cnn(100, 4, 1, filters, regress, "relu")
model.compile(loss='mean_squared_error', optimizer=opt, metrics=['mse', 'mae'])

history = model.fit(
    x=x_train_phase, y=y_train,
    validation_data=( x_test_phase, y_test),
    epochs=epochs, batch_size=64, verbose=2
)

display_graphs(history)
```

Epoch 1/25

1099/1099 - 102s - loss: 1011.1041 - mse: 1011.1041 - mae: 25.8062 - val\_loss: 792.1529 - val\_mse: 792.1529 - val\_mae: 19.7709 - 102s/epoch - 93ms/step

Epoch 2/25

1099/1099 - 99s - loss: 811.7446 - mse: 811.7446 - mae: 20.9664 - val\_loss: 792.1965 - val\_mse: 792.1965 - val\_mae: 19.8763 - 99s/epoch - 90ms/step

Epoch 3/25

1099/1099 - 99s - loss: 788.4951 - mse: 788.4951 - mae: 20.5958 - val\_loss: 735.8916 - val\_mse: 735.8916 - val\_mae: 18.5863 - 99s/epoch - 90ms/step

Epoch 4/25

1099/1099 - 100s - loss: 773.4467 - mse: 773.4467 - mae: 20.2689 - val\_loss: 727.9021 - val\_mse: 727.9021 - val\_mae: 18.3658 - 100s/epoch - 91ms/step

Epoch 5/25

1099/1099 - 99s - loss: 760.7055 - mse: 760.7055 - mae: 20.0006 - val\_loss: 717.4006 - val\_mse: 717.4006 - val\_mae: 18.3424 - 99s/epoch - 90ms/step

Epoch 6/25

1099/1099 - 99s - loss: 757.0266 - mse: 757.0266 - mae: 19.8885 - val\_loss: 712.7858 - val\_mse: 712.7858 - val\_mae: 18.3599 - 99s/epoch - 90ms/step

Epoch 7/25

1099/1099 - 99s - loss: 755.1722 - mse: 755.1722 - mae: 19.8868 - val\_loss: 762.8583 - val\_mse: 762.8583 - val\_mae: 18.8659 - 99s/epoch - 91ms/step

Epoch 8/25

1099/1099 - 100s - loss: 751.6990 - mse: 751.6990 - mae: 19.7892 - val\_loss: 707.0729 - val\_mse: 707.0729 - val\_mae: 18.2075 - 100s/epoch - 91ms/step

Epoch 9/25

1099/1099 - 99s - loss: 744.2941 - mse: 744.2941 - mae: 19.6084 - val\_loss: 743.4955 - val\_mse: 743.4955 - val\_mae: 18.1103 - 99s/epoch - 90ms/step

Epoch 10/25

1099/1099 - 100s - loss: 742.4045 - mse: 742.4045 - mae: 19.5879 - val\_loss: 734.0561 - val\_mse: 734.0561 - val\_mae: 18.4975 - 100s/epoch - 91ms/step

Epoch 11/25

1099/1099 - 99s - loss: 740.3631 - mse: 740.3631 - mae: 19.5445 - val\_loss: 706.3829 - val\_mse: 706.3829 - val\_mae: 17.6604 - 99s/epoch - 90ms/step

Epoch 12/25

1099/1099 - 99s - loss: 739.2933 - mse: 739.2933 - mae: 19.5020 - val\_loss: 721.6161 - val\_mse: 721.6161 - val\_mae: 18.0193 - 99s/epoch - 90ms/step

Epoch 13/25

1099/1099 - 99s - loss: 752.1691 - mse: 752.1691 - mae: 19.7024 - val\_loss: 718.0164 - val\_mse: 718.0164 - val\_mae: 19.2835 - 99s/epoch - 90ms/step

Epoch 14/25

1099/1099 - 100s - loss: 739.1594 - mse: 739.1594 - mae: 19.4765 - val\_loss: 745.6871 - val\_mse: 745.6871 - val\_mae: 18.9125 - 100s/epoch - 91ms/step

Epoch 15/25

1099/1099 - 99s - loss: 735.6421 - mse: 735.6421 - mae: 19.4284 - val\_loss: 719.6741 - val\_mse: 719.6741 - val\_mae: 18.6305 - 99s/epoch - 90ms/step

Epoch 16/25

1099/1099 - 98s - loss: 734.7121 - mse: 734.7121 - mae: 19.4134 - val\_loss: 776.7823 - val\_mse: 776.7823 - val\_mae: 19.2667 - 98s/epoch - 89ms/step

Epoch 17/25

1099/1099 - 99s - loss: 752.7654 - mse: 752.7654 - mae: 19.6912 - val\_loss: 714.2552 - val\_mse: 714.2552 - val\_mae: 17.7103 - 99s/epoch - 90ms/step

Epoch 18/25

1099/1099 - 99s - loss: 737.4454 - mse: 737.4454 - mae: 19.4469 - val\_loss: 690.2399 - val\_mse: 690.2399 - val\_mae: 18.2438 - 99s/epoch - 90ms/step

Epoch 19/25

1099/1099 - 99s - loss: 732.4239 - mse: 732.4239 - mae: 19.3561 - val\_loss:

s: 701.1613 - val\_mse: 701.1613 - val\_mae: 18.0453 - 99s/epoch - 90ms/step  
Epoch 20/25  
1099/1099 - 100s - loss: 732.5556 - mse: 732.5556 - mae: 19.3604 - val\_loss: 688.2559 - val\_mse: 688.2559 - val\_mae: 17.9503 - 100s/epoch - 91ms/step  
Epoch 21/25  
1099/1099 - 100s - loss: 728.3617 - mse: 728.3617 - mae: 19.2606 - val\_loss: 693.5634 - val\_mse: 693.5634 - val\_mae: 17.5144 - 100s/epoch - 91ms/step  
Epoch 22/25  
1099/1099 - 99s - loss: 727.0125 - mse: 727.0125 - mae: 19.2576 - val\_loss: 798.3551 - val\_mse: 798.3551 - val\_mae: 18.7867 - 99s/epoch - 90ms/step  
Epoch 23/25  
1099/1099 - 100s - loss: 731.7050 - mse: 731.7050 - mae: 19.3123 - val\_loss: 694.5927 - val\_mse: 694.5927 - val\_mae: 17.8125 - 100s/epoch - 91ms/step  
Epoch 24/25  
1099/1099 - 100s - loss: 729.3707 - mse: 729.3707 - mae: 19.2601 - val\_loss: 721.3913 - val\_mse: 721.3913 - val\_mae: 18.6778 - 100s/epoch - 91ms/step  
Epoch 25/25  
1099/1099 - 100s - loss: 724.1766 - mse: 724.1766 - mae: 19.1912 - val\_loss: 701.1145 - val\_mse: 701.1145 - val\_mae: 17.4670 - 100s/epoch - 91ms/step

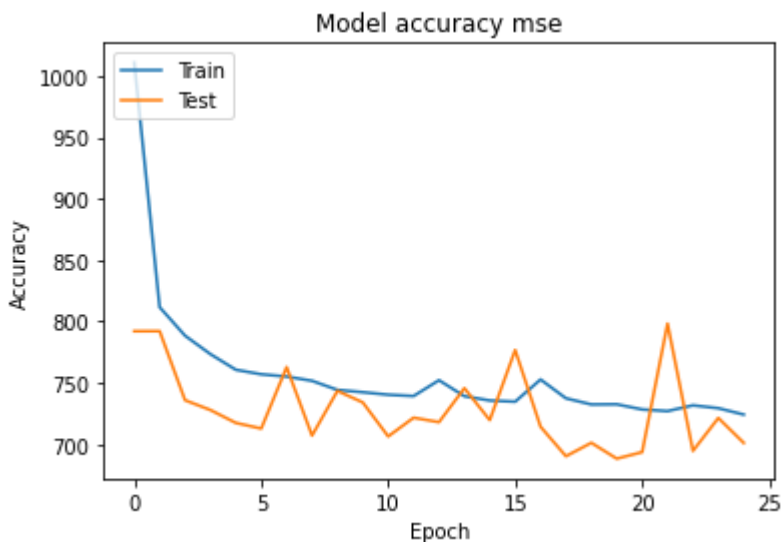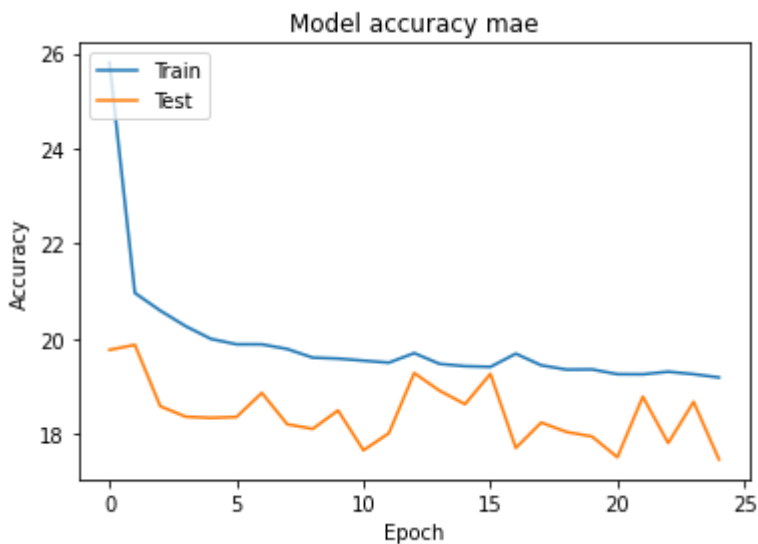

In [ ]:

```
antenna_num = 2
epochs = 25
filters=(64,32,16)
lr = 0.001
opt = Adam(learning_rate=lr)
regress=True

model = create_2d_cnn(100, 4, 1, filters, regress, "relu")

model.compile(loss='mean_squared_error', optimizer=opt, metrics=['mse', 'mae'])

history = model.fit(
    x=x_train_magnitude, y=y_train,
    validation_data=(x_test_magnitude, y_test),
    epochs=epochs, batch_size=64, verbose=2
)

display_graphs(history)
```



Epoch 1/25

1099/1099 - 101s - loss: 892.0627 - mse: 892.0627 - mae: 23.2480 - val\_loss: 806.5480 - val\_mse: 806.5480 - val\_mae: 21.0223 - 101s/epoch - 92ms/step

Epoch 2/25

1099/1099 - 102s - loss: 817.5516 - mse: 817.5516 - mae: 21.4317 - val\_loss: 795.7069 - val\_mse: 795.7069 - val\_mae: 20.9200 - 102s/epoch - 93ms/step

Epoch 3/25

1099/1099 - 102s - loss: 801.6130 - mse: 801.6130 - mae: 21.1763 - val\_loss: 755.3731 - val\_mse: 755.3731 - val\_mae: 20.0149 - 102s/epoch - 93ms/step

Epoch 4/25

1099/1099 - 101s - loss: 779.4277 - mse: 779.4277 - mae: 20.7689 - val\_loss: 717.4008 - val\_mse: 717.4008 - val\_mae: 18.5678 - 101s/epoch - 92ms/step

Epoch 5/25

1099/1099 - 100s - loss: 762.0817 - mse: 762.0817 - mae: 20.3970 - val\_loss: 705.8080 - val\_mse: 705.8080 - val\_mae: 18.6564 - 100s/epoch - 91ms/step

Epoch 6/25

1099/1099 - 99s - loss: 748.8035 - mse: 748.8035 - mae: 20.1588 - val\_loss: 693.0465 - val\_mse: 693.0465 - val\_mae: 18.0041 - 99s/epoch - 91ms/step

Epoch 7/25

1099/1099 - 100s - loss: 739.8503 - mse: 739.8503 - mae: 19.9384 - val\_loss: 680.6411 - val\_mse: 680.6411 - val\_mae: 18.0983 - 100s/epoch - 91ms/step

Epoch 8/25

1099/1099 - 101s - loss: 733.2516 - mse: 733.2516 - mae: 19.7782 - val\_loss: 664.0025 - val\_mse: 664.0025 - val\_mae: 17.6752 - 101s/epoch - 91ms/step

Epoch 9/25

1099/1099 - 102s - loss: 719.1041 - mse: 719.1041 - mae: 19.4737 - val\_loss: 646.8347 - val\_mse: 646.8347 - val\_mae: 17.2760 - 102s/epoch - 93ms/step

Epoch 10/25

1099/1099 - 102s - loss: 709.9136 - mse: 709.9136 - mae: 19.3226 - val\_loss: 642.0100 - val\_mse: 642.0100 - val\_mae: 17.2213 - 102s/epoch - 93ms/step

Epoch 11/25

1099/1099 - 103s - loss: 697.1243 - mse: 697.1243 - mae: 19.0828 - val\_loss: 620.6154 - val\_mse: 620.6154 - val\_mae: 16.4995 - 103s/epoch - 94ms/step

Epoch 12/25

1099/1099 - 103s - loss: 683.6797 - mse: 683.6797 - mae: 18.8338 - val\_loss: 600.2341 - val\_mse: 600.2341 - val\_mae: 16.1111 - 103s/epoch - 94ms/step

Epoch 13/25

1099/1099 - 102s - loss: 691.8763 - mse: 691.8763 - mae: 18.9342 - val\_loss: 614.6382 - val\_mse: 614.6382 - val\_mae: 16.3807 - 102s/epoch - 92ms/step

Epoch 14/25

1099/1099 - 100s - loss: 657.1886 - mse: 657.1886 - mae: 18.2805 - val\_loss: 588.7519 - val\_mse: 588.7519 - val\_mae: 15.8530 - 100s/epoch - 91ms/step

Epoch 15/25

1099/1099 - 100s - loss: 638.5999 - mse: 638.5999 - mae: 17.9119 - val\_loss: 533.5676 - val\_mse: 533.5676 - val\_mae: 14.9377 - 100s/epoch - 91ms/step

Epoch 16/25

1099/1099 - 100s - loss: 620.2070 - mse: 620.2070 - mae: 17.5356 - val\_loss:

s: 494.1069 - val\_mse: 494.1069 - val\_mae: 14.3448 - 100s/epoch - 91ms/step  
Epoch 17/25  
1099/1099 - 100s - loss: 603.5022 - mse: 603.5022 - mae: 17.1649 - val\_loss: 529.9139 - val\_mse: 529.9139 - val\_mae: 14.5983 - 100s/epoch - 91ms/step  
Epoch 18/25  
1099/1099 - 100s - loss: 586.4215 - mse: 586.4215 - mae: 16.8535 - val\_loss: 464.1360 - val\_mse: 464.1360 - val\_mae: 13.4438 - 100s/epoch - 91ms/step  
Epoch 19/25  
1099/1099 - 100s - loss: 573.7258 - mse: 573.7258 - mae: 16.5905 - val\_loss: 454.0565 - val\_mse: 454.0565 - val\_mae: 13.1131 - 100s/epoch - 91ms/step  
Epoch 20/25  
1099/1099 - 99s - loss: 556.9063 - mse: 556.9063 - mae: 16.3151 - val\_loss: 433.5365 - val\_mse: 433.5365 - val\_mae: 12.6708 - 99s/epoch - 90ms/step  
Epoch 21/25  
1099/1099 - 100s - loss: 546.7626 - mse: 546.7626 - mae: 16.1347 - val\_loss: 431.4627 - val\_mse: 431.4627 - val\_mae: 12.3216 - 100s/epoch - 91ms/step  
Epoch 22/25  
1099/1099 - 100s - loss: 530.4498 - mse: 530.4498 - mae: 15.7736 - val\_loss: 396.1434 - val\_mse: 396.1434 - val\_mae: 12.1695 - 100s/epoch - 91ms/step  
Epoch 23/25  
1099/1099 - 99s - loss: 518.8772 - mse: 518.8772 - mae: 15.5517 - val\_loss: 368.9839 - val\_mse: 368.9839 - val\_mae: 11.3575 - 99s/epoch - 90ms/step  
Epoch 24/25  
1099/1099 - 100s - loss: 511.6860 - mse: 511.6860 - mae: 15.4138 - val\_loss: 376.8333 - val\_mse: 376.8333 - val\_mae: 11.8295 - 100s/epoch - 91ms/step  
Epoch 25/25  
1099/1099 - 100s - loss: 499.6666 - mse: 499.6666 - mae: 15.1645 - val\_loss: 362.7004 - val\_mse: 362.7004 - val\_mae: 11.3777 - 100s/epoch - 91ms/step

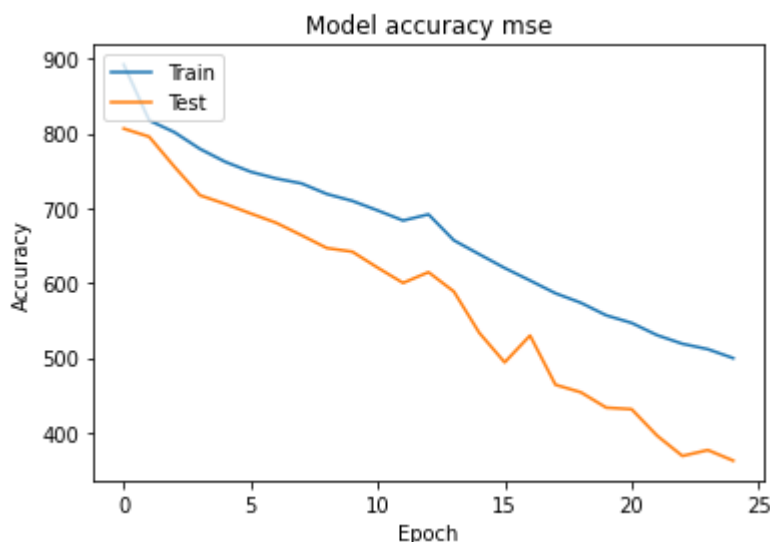

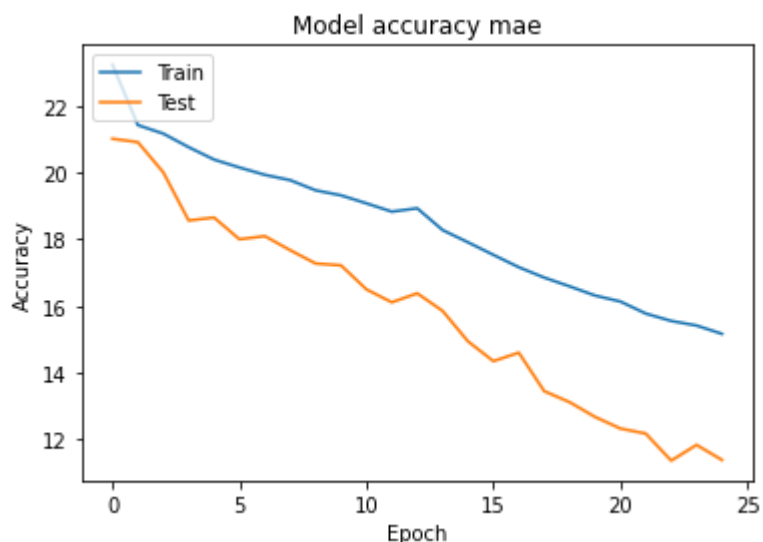

## 2-by-2 antenna array with PCA

In [ ]:

```
magnitude = pd.read_csv('/content/drive/MyDrive/train_magnitude.csv', header=None).to_numpy()
output_data = pd.read_csv('/content/drive/MyDrive/train_outputs.csv', header=None).to_numpy()
phase = pd.read_csv('/content/drive/MyDrive/train_phase.csv', header=None).to_numpy()

data = load_data(phase, magnitude, output_data, antenna_num)

phase_data = data[0]
magnitude_data = data[1]
output_data = data[2]

reduced_data = perform_dimensionality_reduction(phase_data, magnitude_data)
phase_data = reduced_data[0]
magnitude_data = reduced_data[1]

data_split = split_test_train(phase_data, magnitude_data, output_data, 0.4)
x_train_magnitude = data_split[0]
x_test_magnitude = data_split[1]
x_train_phase = data_split[2]
x_test_phase = data_split[3]
y_train = data_split[4][:,0:2]
y_test = data_split[5][:,0:2]

lr = 0.001
epochs = 100
opt = Adam(learning_rate=lr)
```

In [ ]:

```
print("Combined phase and magnitude MLP")

layers = (40,10)
shape = (40,)
magnitude = create_mlp(shape, layers, False, "relu")
phase = create_mlp(shape, layers, False, "relu")

model = combine_models(phase, magnitude, (10,))
model.compile(loss='mean_squared_error', optimizer=opt, metrics=['mse', 'mae'])

history = model.fit(
    x=[x_train_magnitude, x_train_phase], y=y_train,
    validation_data=(x_test_magnitude, x_test_phase), y_test),
    epochs=epochs, batch_size=64, verbose=2
)

display_graphs(history)
```

## Combined phase and magnitude MLP

Epoch 1/100

1099/1099 - 3s - loss: 1220.4243 - mse: 1220.4243 - mae: 30.2614 - val\_loss: 1218.6901 - val\_mse: 1218.6901 - val\_mae: 30.2204 - 3s/epoch - 3ms/step

Epoch 2/100

1099/1099 - 2s - loss: 1219.5498 - mse: 1219.5498 - mae: 30.2485 - val\_loss: 1217.5602 - val\_mse: 1217.5602 - val\_mae: 30.2034 - 2s/epoch - 2ms/step

Epoch 3/100

1099/1099 - 2s - loss: 1218.3538 - mse: 1218.3538 - mae: 30.2312 - val\_loss: 1216.1229 - val\_mse: 1216.1229 - val\_mae: 30.1812 - 2s/epoch - 2ms/step

Epoch 4/100

1099/1099 - 2s - loss: 1216.3759 - mse: 1216.3759 - mae: 30.1987 - val\_loss: 1212.0793 - val\_mse: 1212.0793 - val\_mae: 30.1212 - 2s/epoch - 2ms/step

Epoch 5/100

1099/1099 - 3s - loss: 1211.3856 - mse: 1211.3856 - mae: 30.1137 - val\_loss: 1201.4552 - val\_mse: 1201.4552 - val\_mae: 29.9640 - 3s/epoch - 2ms/step

Epoch 6/100

1099/1099 - 2s - loss: 1203.0907 - mse: 1203.0907 - mae: 29.9589 - val\_loss: 1180.0905 - val\_mse: 1180.0905 - val\_mae: 29.6470 - 2s/epoch - 2ms/step

Epoch 7/100

1099/1099 - 2s - loss: 1183.0438 - mse: 1183.0438 - mae: 29.5954 - val\_loss: 1133.9657 - val\_mse: 1133.9657 - val\_mae: 28.9063 - 2s/epoch - 2ms/step

Epoch 8/100

1099/1099 - 2s - loss: 1150.2987 - mse: 1150.2987 - mae: 28.9725 - val\_loss: 1074.4005 - val\_mse: 1074.4005 - val\_mae: 27.7981 - 2s/epoch - 2ms/step

Epoch 9/100

1099/1099 - 2s - loss: 1105.2329 - mse: 1105.2329 - mae: 28.0446 - val\_loss: 1007.2913 - val\_mse: 1007.2913 - val\_mae: 26.4001 - 2s/epoch - 2ms/step

Epoch 10/100

1099/1099 - 3s - loss: 1059.8762 - mse: 1059.8762 - mae: 27.1014 - val\_loss: 960.5413 - val\_mse: 960.5413 - val\_mae: 25.3143 - 3s/epoch - 2ms/step

Epoch 11/100

1099/1099 - 2s - loss: 1024.9821 - mse: 1024.9821 - mae: 26.3294 - val\_loss: 939.5178 - val\_mse: 939.5178 - val\_mae: 24.7647 - 2s/epoch - 2ms/step

Epoch 12/100

1099/1099 - 2s - loss: 997.1172 - mse: 997.1172 - mae: 25.7504 - val\_loss: 921.7731 - val\_mse: 921.7731 - val\_mae: 24.3200 - 2s/epoch - 2ms/step

Epoch 13/100

1099/1099 - 2s - loss: 978.6317 - mse: 978.6317 - mae: 25.3546 - val\_loss: 901.4366 - val\_mse: 901.4366 - val\_mae: 23.7911 - 2s/epoch - 2ms/step

Epoch 14/100

1099/1099 - 2s - loss: 966.4019 - mse: 966.4019 - mae: 25.0437 - val\_loss: 900.4521 - val\_mse: 900.4521 - val\_mae: 23.8084 - 2s/epoch - 2ms/step

Epoch 15/100

1099/1099 - 2s - loss: 956.9122 - mse: 956.9122 - mae: 24.8655 - val\_loss: 892.4971 - val\_mse: 892.4971 - val\_mae: 23.5818 - 2s/epoch - 2ms/step

Epoch 16/100

1099/1099 - 2s - loss: 947.3326 - mse: 947.3326 - mae: 24.6638 - val\_loss: 883.2513 - val\_mse: 883.2513 - val\_mae: 23.3570 - 2s/epoch - 2ms/step

Epoch 17/100

1099/1099 - 2s - loss: 940.8312 - mse: 940.8312 - mae: 24.5149 - val\_loss: 879.7424 - val\_mse: 879.7424 - val\_mae: 23.2371 - 2s/epoch - 2ms/step

Epoch 18/100

1099/1099 - 2s - loss: 937.8395 - mse: 937.8395 - mae: 24.4475 - val\_loss: 876.2108 - val\_mse: 876.2108 - val\_mae: 23.1702 - 2s/epoch - 2ms/step

Epoch 19/100

1099/1099 - 2s - loss: 930.8911 - mse: 930.8911 - mae: 24.3379 - val\_loss: 874.3079 - val\_mse: 874.3079 - val\_mae: 23.1674 - 2s/epoch - 2ms/step

Epoch 20/100

1099/1099 - 2s - loss: 932.2515 - mse: 932.2515 - mae: 24.3381 - val\_loss: 872.4382 - val\_mse: 872.4382 - val\_mae: 23.0685 - 2s/epoch - 2ms/step

Epoch 21/100

1099/1099 - 2s - loss: 927.5084 - mse: 927.5084 - mae: 24.2336 - val\_loss: 872.6052 - val\_mse: 872.6052 - val\_mae: 23.0673 - 2s/epoch - 2ms/step

Epoch 22/100

1099/1099 - 2s - loss: 923.7978 - mse: 923.7978 - mae: 24.1604 - val\_loss: 870.8288 - val\_mse: 870.8288 - val\_mae: 23.0246 - 2s/epoch - 2ms/step

Epoch 23/100

1099/1099 - 2s - loss: 924.0066 - mse: 924.0066 - mae: 24.1657 - val\_loss: 864.4640 - val\_mse: 864.4640 - val\_mae: 22.8287 - 2s/epoch - 2ms/step

Epoch 24/100

1099/1099 - 2s - loss: 920.3025 - mse: 920.3025 - mae: 24.0708 - val\_loss: 862.0488 - val\_mse: 862.0488 - val\_mae: 22.7913 - 2s/epoch - 2ms/step

Epoch 25/100

1099/1099 - 2s - loss: 919.6486 - mse: 919.6486 - mae: 24.0679 - val\_loss: 861.4903 - val\_mse: 861.4903 - val\_mae: 22.8415 - 2s/epoch - 2ms/step

Epoch 26/100

1099/1099 - 2s - loss: 915.4541 - mse: 915.4541 - mae: 23.9860 - val\_loss: 862.7271 - val\_mse: 862.7271 - val\_mae: 22.8562 - 2s/epoch - 2ms/step

Epoch 27/100

1099/1099 - 2s - loss: 915.5226 - mse: 915.5226 - mae: 23.9846 - val\_loss: 860.4774 - val\_mse: 860.4774 - val\_mae: 22.7838 - 2s/epoch - 2ms/step

Epoch 28/100

1099/1099 - 2s - loss: 912.9908 - mse: 912.9908 - mae: 23.9373 - val\_loss: 861.1306 - val\_mse: 861.1306 - val\_mae: 22.8036 - 2s/epoch - 2ms/step

Epoch 29/100

1099/1099 - 2s - loss: 911.9661 - mse: 911.9661 - mae: 23.9119 - val\_loss: 857.4001 - val\_mse: 857.4001 - val\_mae: 22.7199 - 2s/epoch - 2ms/step

Epoch 30/100

1099/1099 - 2s - loss: 911.2148 - mse: 911.2148 - mae: 23.9167 - val\_loss: 866.4727 - val\_mse: 866.4727 - val\_mae: 22.9567 - 2s/epoch - 2ms/step

Epoch 31/100

1099/1099 - 2s - loss: 910.2256 - mse: 910.2256 - mae: 23.8653 - val\_loss: 854.3936 - val\_mse: 854.3936 - val\_mae: 22.6536 - 2s/epoch - 2ms/step

Epoch 32/100

1099/1099 - 2s - loss: 905.3555 - mse: 905.3555 - mae: 23.7926 - val\_loss: 855.5649 - val\_mse: 855.5649 - val\_mae: 22.6952 - 2s/epoch - 2ms/step

Epoch 33/100

1099/1099 - 2s - loss: 905.7891 - mse: 905.7891 - mae: 23.7930 - val\_loss: 852.2278 - val\_mse: 852.2278 - val\_mae: 22.6071 - 2s/epoch - 2ms/step

Epoch 34/100

1099/1099 - 2s - loss: 905.3749 - mse: 905.3749 - mae: 23.7856 - val\_loss: 854.0458 - val\_mse: 854.0458 - val\_mae: 22.6639 - 2s/epoch - 2ms/step

Epoch 35/100

1099/1099 - 2s - loss: 906.0281 - mse: 906.0281 - mae: 23.7922 - val\_loss: 852.1747 - val\_mse: 852.1747 - val\_mae: 22.5698 - 2s/epoch - 2ms/step

Epoch 36/100

1099/1099 - 2s - loss: 902.2498 - mse: 902.2498 - mae: 23.7175 - val\_loss: 852.4038 - val\_mse: 852.4038 - val\_mae: 22.5681 - 2s/epoch - 2ms/step

Epoch 37/100

1099/1099 - 2s - loss: 903.5773 - mse: 903.5773 - mae: 23.7266 - val\_loss: 855.9458 - val\_mse: 855.9458 - val\_mae: 22.6986 - 2s/epoch - 2ms/step

Epoch 38/100

1099/1099 - 2s - loss: 903.1401 - mse: 903.1401 - mae: 23.7211 - val\_loss: 851.9169 - val\_mse: 851.9169 - val\_mae: 22.5664 - 2s/epoch - 2ms/step

Epoch 39/100

1099/1099 - 2s - loss: 900.2139 - mse: 900.2139 - mae: 23.6814 - val\_loss: 853.5440 - val\_mse: 853.5440 - val\_mae: 22.6150 - 2s/epoch - 2ms/step

Epoch 40/100

1099/1099 - 2s - loss: 898.5853 - mse: 898.5853 - mae: 23.6178 - val\_loss: 850.5106 - val\_mse: 850.5106 - val\_mae: 22.5759 - 2s/epoch - 2ms/step

Epoch 41/100

1099/1099 - 2s - loss: 899.5221 - mse: 899.5221 - mae: 23.6666 - val\_loss: 855.4748 - val\_mse: 855.4748 - val\_mae: 22.7116 - 2s/epoch - 2ms/step  
Epoch 42/100  
1099/1099 - 2s - loss: 896.8516 - mse: 896.8516 - mae: 23.6132 - val\_loss: 849.3291 - val\_mse: 849.3291 - val\_mae: 22.5120 - 2s/epoch - 2ms/step  
Epoch 43/100  
1099/1099 - 2s - loss: 895.6896 - mse: 895.6896 - mae: 23.5973 - val\_loss: 846.8271 - val\_mse: 846.8271 - val\_mae: 22.4439 - 2s/epoch - 2ms/step  
Epoch 44/100  
1099/1099 - 2s - loss: 896.1092 - mse: 896.1092 - mae: 23.5604 - val\_loss: 847.9788 - val\_mse: 847.9788 - val\_mae: 22.5058 - 2s/epoch - 2ms/step  
Epoch 45/100  
1099/1099 - 2s - loss: 894.6590 - mse: 894.6590 - mae: 23.5552 - val\_loss: 845.5579 - val\_mse: 845.5579 - val\_mae: 22.4232 - 2s/epoch - 2ms/step  
Epoch 46/100  
1099/1099 - 2s - loss: 893.5120 - mse: 893.5120 - mae: 23.5379 - val\_loss: 850.1948 - val\_mse: 850.1948 - val\_mae: 22.5067 - 2s/epoch - 2ms/step  
Epoch 47/100  
1099/1099 - 2s - loss: 893.0414 - mse: 893.0414 - mae: 23.5206 - val\_loss: 843.8821 - val\_mse: 843.8821 - val\_mae: 22.3679 - 2s/epoch - 2ms/step  
Epoch 48/100  
1099/1099 - 2s - loss: 893.4833 - mse: 893.4833 - mae: 23.5180 - val\_loss: 842.3267 - val\_mse: 842.3267 - val\_mae: 22.3304 - 2s/epoch - 2ms/step  
Epoch 49/100  
1099/1099 - 2s - loss: 891.8444 - mse: 891.8444 - mae: 23.5035 - val\_loss: 844.8317 - val\_mse: 844.8317 - val\_mae: 22.4216 - 2s/epoch - 2ms/step  
Epoch 50/100  
1099/1099 - 2s - loss: 890.5070 - mse: 890.5070 - mae: 23.4600 - val\_loss: 842.1860 - val\_mse: 842.1860 - val\_mae: 22.3496 - 2s/epoch - 2ms/step  
Epoch 51/100  
1099/1099 - 2s - loss: 889.8328 - mse: 889.8328 - mae: 23.4482 - val\_loss: 842.8445 - val\_mse: 842.8445 - val\_mae: 22.3218 - 2s/epoch - 2ms/step  
Epoch 52/100  
1099/1099 - 2s - loss: 888.8114 - mse: 888.8114 - mae: 23.4077 - val\_loss: 843.7339 - val\_mse: 843.7339 - val\_mae: 22.3414 - 2s/epoch - 2ms/step  
Epoch 53/100  
1099/1099 - 2s - loss: 891.3886 - mse: 891.3886 - mae: 23.4567 - val\_loss: 847.4427 - val\_mse: 847.4427 - val\_mae: 22.5003 - 2s/epoch - 2ms/step  
Epoch 54/100  
1099/1099 - 2s - loss: 890.2655 - mse: 890.2655 - mae: 23.4408 - val\_loss: 845.6577 - val\_mse: 845.6577 - val\_mae: 22.4478 - 2s/epoch - 2ms/step  
Epoch 55/100  
1099/1099 - 2s - loss: 887.1660 - mse: 887.1660 - mae: 23.3672 - val\_loss: 840.6286 - val\_mse: 840.6286 - val\_mae: 22.2745 - 2s/epoch - 2ms/step  
Epoch 56/100  
1099/1099 - 2s - loss: 886.5303 - mse: 886.5303 - mae: 23.3771 - val\_loss: 843.8921 - val\_mse: 843.8921 - val\_mae: 22.3486 - 2s/epoch - 2ms/step  
Epoch 57/100  
1099/1099 - 2s - loss: 887.1223 - mse: 887.1223 - mae: 23.3766 - val\_loss: 840.6371 - val\_mse: 840.6371 - val\_mae: 22.2726 - 2s/epoch - 2ms/step  
Epoch 58/100  
1099/1099 - 2s - loss: 885.0471 - mse: 885.0471 - mae: 23.3438 - val\_loss: 841.6624 - val\_mse: 841.6624 - val\_mae: 22.3377 - 2s/epoch - 2ms/step  
Epoch 59/100  
1099/1099 - 2s - loss: 885.6667 - mse: 885.6667 - mae: 23.3452 - val\_loss: 845.5714 - val\_mse: 845.5714 - val\_mae: 22.4549 - 2s/epoch - 2ms/step  
Epoch 60/100  
1099/1099 - 2s - loss: 885.0555 - mse: 885.0555 - mae: 23.3441 - val\_loss: 841.5771 - val\_mse: 841.5771 - val\_mae: 22.3359 - 2s/epoch - 2ms/step  
Epoch 61/100  
1099/1099 - 2s - loss: 883.2724 - mse: 883.2724 - mae: 23.2866 - val\_loss:

840.4389 - val\_mse: 840.4389 - val\_mae: 22.2838 - 2s/epoch - 2ms/step  
Epoch 62/100  
1099/1099 - 2s - loss: 883.2661 - mse: 883.2661 - mae: 23.2910 - val\_loss:  
837.9756 - val\_mse: 837.9756 - val\_mae: 22.2197 - 2s/epoch - 2ms/step  
Epoch 63/100  
1099/1099 - 2s - loss: 883.1022 - mse: 883.1022 - mae: 23.3027 - val\_loss:  
839.0566 - val\_mse: 839.0566 - val\_mae: 22.2411 - 2s/epoch - 2ms/step  
Epoch 64/100  
1099/1099 - 2s - loss: 881.7102 - mse: 881.7102 - mae: 23.2509 - val\_loss:  
836.3455 - val\_mse: 836.3455 - val\_mae: 22.1963 - 2s/epoch - 2ms/step  
Epoch 65/100  
1099/1099 - 2s - loss: 882.2518 - mse: 882.2518 - mae: 23.2624 - val\_loss:  
838.2920 - val\_mse: 838.2920 - val\_mae: 22.2337 - 2s/epoch - 2ms/step  
Epoch 66/100  
1099/1099 - 2s - loss: 881.8683 - mse: 881.8683 - mae: 23.2494 - val\_loss:  
836.5823 - val\_mse: 836.5823 - val\_mae: 22.1236 - 2s/epoch - 2ms/step  
Epoch 67/100  
1099/1099 - 2s - loss: 880.7504 - mse: 880.7504 - mae: 23.2284 - val\_loss:  
837.4302 - val\_mse: 837.4302 - val\_mae: 22.1998 - 2s/epoch - 2ms/step  
Epoch 68/100  
1099/1099 - 2s - loss: 881.2985 - mse: 881.2985 - mae: 23.2383 - val\_loss:  
837.5684 - val\_mse: 837.5684 - val\_mae: 22.2026 - 2s/epoch - 2ms/step  
Epoch 69/100  
1099/1099 - 3s - loss: 882.4903 - mse: 882.4903 - mae: 23.2651 - val\_loss:  
842.4023 - val\_mse: 842.4023 - val\_mae: 22.3132 - 3s/epoch - 2ms/step  
Epoch 70/100  
1099/1099 - 3s - loss: 880.5797 - mse: 880.5797 - mae: 23.2179 - val\_loss:  
835.1270 - val\_mse: 835.1270 - val\_mae: 22.0779 - 3s/epoch - 2ms/step  
Epoch 71/100  
1099/1099 - 2s - loss: 880.0410 - mse: 880.0410 - mae: 23.1882 - val\_loss:  
837.8970 - val\_mse: 837.8970 - val\_mae: 22.1988 - 2s/epoch - 2ms/step  
Epoch 72/100  
1099/1099 - 2s - loss: 881.9332 - mse: 881.9332 - mae: 23.2406 - val\_loss:  
838.7895 - val\_mse: 838.7895 - val\_mae: 22.2512 - 2s/epoch - 2ms/step  
Epoch 73/100  
1099/1099 - 2s - loss: 878.3668 - mse: 878.3668 - mae: 23.1644 - val\_loss:  
838.5954 - val\_mse: 838.5954 - val\_mae: 22.1999 - 2s/epoch - 2ms/step  
Epoch 74/100  
1099/1099 - 3s - loss: 880.8215 - mse: 880.8215 - mae: 23.2086 - val\_loss:  
838.5256 - val\_mse: 838.5256 - val\_mae: 22.1712 - 3s/epoch - 2ms/step  
Epoch 75/100  
1099/1099 - 2s - loss: 877.3016 - mse: 877.3016 - mae: 23.1456 - val\_loss:  
836.8365 - val\_mse: 836.8365 - val\_mae: 22.1742 - 2s/epoch - 2ms/step  
Epoch 76/100  
1099/1099 - 2s - loss: 877.9227 - mse: 877.9227 - mae: 23.1597 - val\_loss:  
836.3517 - val\_mse: 836.3517 - val\_mae: 22.1001 - 2s/epoch - 2ms/step  
Epoch 77/100  
1099/1099 - 2s - loss: 876.7645 - mse: 876.7645 - mae: 23.1168 - val\_loss:  
835.5219 - val\_mse: 835.5219 - val\_mae: 22.1315 - 2s/epoch - 2ms/step  
Epoch 78/100  
1099/1099 - 2s - loss: 876.7520 - mse: 876.7520 - mae: 23.1204 - val\_loss:  
836.9891 - val\_mse: 836.9891 - val\_mae: 22.1611 - 2s/epoch - 2ms/step  
Epoch 79/100  
1099/1099 - 2s - loss: 876.9647 - mse: 876.9647 - mae: 23.1389 - val\_loss:  
835.7537 - val\_mse: 835.7537 - val\_mae: 22.1550 - 2s/epoch - 2ms/step  
Epoch 80/100  
1099/1099 - 2s - loss: 875.7762 - mse: 875.7762 - mae: 23.1200 - val\_loss:  
835.1599 - val\_mse: 835.1599 - val\_mae: 22.0801 - 2s/epoch - 2ms/step  
Epoch 81/100  
1099/1099 - 2s - loss: 875.2734 - mse: 875.2734 - mae: 23.0676 - val\_loss:  
833.1453 - val\_mse: 833.1453 - val\_mae: 22.0478 - 2s/epoch - 2ms/step



Epoch 82/100

1099/1099 - 2s - loss: 875.1000 - mse: 875.1000 - mae: 23.0520 - val\_loss: 834.2982 - val\_mse: 834.2982 - val\_mae: 22.0610 - 2s/epoch - 2ms/step

Epoch 83/100

1099/1099 - 2s - loss: 874.3994 - mse: 874.3994 - mae: 23.0536 - val\_loss: 834.6977 - val\_mse: 834.6977 - val\_mae: 22.0408 - 2s/epoch - 2ms/step

Epoch 84/100

1099/1099 - 2s - loss: 873.3902 - mse: 873.3902 - mae: 23.0270 - val\_loss: 830.2946 - val\_mse: 830.2946 - val\_mae: 21.9512 - 2s/epoch - 2ms/step

Epoch 85/100

1099/1099 - 2s - loss: 870.6918 - mse: 870.6918 - mae: 22.9854 - val\_loss: 836.4169 - val\_mse: 836.4169 - val\_mae: 22.1163 - 2s/epoch - 2ms/step

Epoch 86/100

1099/1099 - 2s - loss: 872.7094 - mse: 872.7094 - mae: 23.0029 - val\_loss: 833.0557 - val\_mse: 833.0557 - val\_mae: 22.0717 - 2s/epoch - 2ms/step

Epoch 87/100

1099/1099 - 3s - loss: 872.6668 - mse: 872.6668 - mae: 23.0032 - val\_loss: 833.4969 - val\_mse: 833.4969 - val\_mae: 22.0262 - 3s/epoch - 2ms/step

Epoch 88/100

1099/1099 - 2s - loss: 870.3195 - mse: 870.3195 - mae: 22.9484 - val\_loss: 831.5313 - val\_mse: 831.5313 - val\_mae: 21.9756 - 2s/epoch - 2ms/step

Epoch 89/100

1099/1099 - 2s - loss: 871.1688 - mse: 871.1688 - mae: 22.9819 - val\_loss: 829.1918 - val\_mse: 829.1918 - val\_mae: 21.8905 - 2s/epoch - 2ms/step

Epoch 90/100

1099/1099 - 2s - loss: 870.4416 - mse: 870.4416 - mae: 22.9646 - val\_loss: 832.3525 - val\_mse: 832.3525 - val\_mae: 22.0076 - 2s/epoch - 2ms/step

Epoch 91/100

1099/1099 - 2s - loss: 870.8822 - mse: 870.8822 - mae: 22.9612 - val\_loss: 832.3726 - val\_mse: 832.3726 - val\_mae: 22.0124 - 2s/epoch - 2ms/step

Epoch 92/100

1099/1099 - 2s - loss: 870.1180 - mse: 870.1180 - mae: 22.9412 - val\_loss: 834.2374 - val\_mse: 834.2374 - val\_mae: 22.0694 - 2s/epoch - 2ms/step

Epoch 93/100

1099/1099 - 2s - loss: 868.0063 - mse: 868.0063 - mae: 22.9041 - val\_loss: 831.7313 - val\_mse: 831.7313 - val\_mae: 22.0004 - 2s/epoch - 2ms/step

Epoch 94/100

1099/1099 - 2s - loss: 870.9419 - mse: 870.9419 - mae: 22.9698 - val\_loss: 832.8166 - val\_mse: 832.8166 - val\_mae: 21.9983 - 2s/epoch - 2ms/step

Epoch 95/100

1099/1099 - 2s - loss: 868.4117 - mse: 868.4117 - mae: 22.8738 - val\_loss: 832.8957 - val\_mse: 832.8957 - val\_mae: 21.9811 - 2s/epoch - 2ms/step

Epoch 96/100

1099/1099 - 2s - loss: 867.2708 - mse: 867.2708 - mae: 22.8768 - val\_loss: 829.9014 - val\_mse: 829.9014 - val\_mae: 21.9338 - 2s/epoch - 2ms/step

Epoch 97/100

1099/1099 - 2s - loss: 867.5429 - mse: 867.5429 - mae: 22.8736 - val\_loss: 828.8050 - val\_mse: 828.8050 - val\_mae: 21.8792 - 2s/epoch - 2ms/step

Epoch 98/100

1099/1099 - 2s - loss: 868.5859 - mse: 868.5859 - mae: 22.9093 - val\_loss: 832.5293 - val\_mse: 832.5293 - val\_mae: 21.9857 - 2s/epoch - 2ms/step

Epoch 99/100

1099/1099 - 2s - loss: 866.9859 - mse: 866.9859 - mae: 22.8657 - val\_loss: 829.6936 - val\_mse: 829.6936 - val\_mae: 21.9082 - 2s/epoch - 2ms/step

Epoch 100/100

1099/1099 - 2s - loss: 864.8521 - mse: 864.8521 - mae: 22.8326 - val\_loss: 830.9366 - val\_mse: 830.9366 - val\_mae: 21.9682 - 2s/epoch - 2ms/step

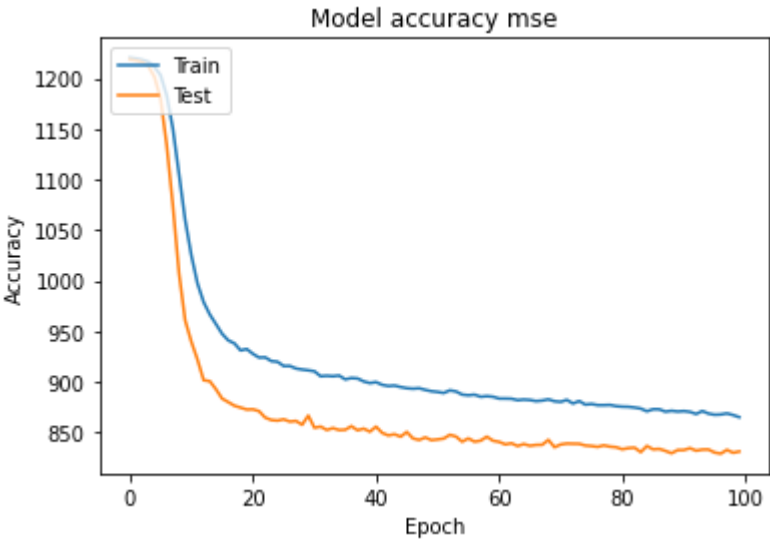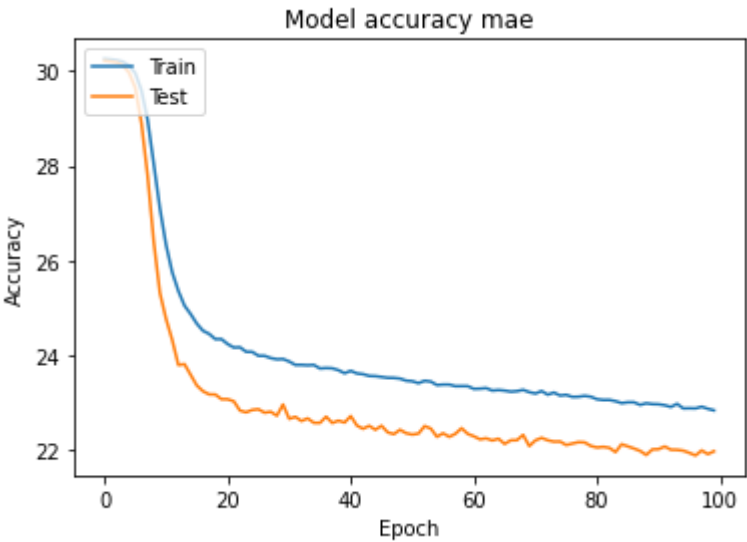

In [ ]:

```
print("Combined phase and magnitude 1D CNN")

shape=(40,1)
filters=(8,8)
layers=(10,)
epochs = 25

phase = create_1d_cnn(shape, False, filters, layers, 'relu')
magnitude = create_1d_cnn(shape, False, filters, layers, 'relu')

model = combine_models(phase, magnitude, (10,))
model.compile(loss='mean_squared_error', optimizer=opt, metrics=['mse', 'mae'])

history = model.fit(
    x=[x_train_magnitude, x_train_phase], y=y_train,
    validation_data=(x_test_magnitude, x_test_phase),
    epochs=epochs, batch_size=64, verbose=2
)

display_graphs(history)
```

## Combined phase and magnitude 1D CNN

Epoch 1/25

1099/1099 - 6s - loss: 1203.1497 - mse: 1203.1497 - mae: 29.9634 - val\_loss: 1140.8578 - val\_mse: 1140.8578 - val\_mae: 29.0058 - 6s/epoch - 5ms/step

Epoch 2/25

1099/1099 - 5s - loss: 1114.0518 - mse: 1114.0518 - mae: 28.2260 - val\_loss: 1067.7360 - val\_mse: 1067.7360 - val\_mae: 27.6349 - 5s/epoch - 4ms/step

Epoch 3/25

1099/1099 - 5s - loss: 1062.9465 - mse: 1062.9465 - mae: 27.1729 - val\_loss: 1014.1903 - val\_mse: 1014.1903 - val\_mae: 26.6158 - 5s/epoch - 4ms/step

Epoch 4/25

1099/1099 - 5s - loss: 1026.8593 - mse: 1026.8593 - mae: 26.4198 - val\_loss: 977.5419 - val\_mse: 977.5419 - val\_mae: 25.8245 - 5s/epoch - 4ms/step

Epoch 5/25

1099/1099 - 5s - loss: 993.2539 - mse: 993.2539 - mae: 25.7164 - val\_loss: 937.0168 - val\_mse: 937.0168 - val\_mae: 24.9360 - 5s/epoch - 4ms/step

Epoch 6/25

1099/1099 - 5s - loss: 969.1327 - mse: 969.1327 - mae: 25.2381 - val\_loss: 936.3973 - val\_mse: 936.3973 - val\_mae: 24.9285 - 5s/epoch - 4ms/step

Epoch 7/25

1099/1099 - 5s - loss: 954.7456 - mse: 954.7456 - mae: 24.9321 - val\_loss: 950.3644 - val\_mse: 950.3644 - val\_mae: 25.2039 - 5s/epoch - 4ms/step

Epoch 8/25

1099/1099 - 5s - loss: 940.0179 - mse: 940.0179 - mae: 24.6252 - val\_loss: 909.6603 - val\_mse: 909.6603 - val\_mae: 24.2852 - 5s/epoch - 4ms/step

Epoch 9/25

1099/1099 - 5s - loss: 932.3753 - mse: 932.3753 - mae: 24.4534 - val\_loss: 897.2141 - val\_mse: 897.2141 - val\_mae: 23.9303 - 5s/epoch - 4ms/step

Epoch 10/25

1099/1099 - 5s - loss: 927.3021 - mse: 927.3021 - mae: 24.3397 - val\_loss: 922.2180 - val\_mse: 922.2180 - val\_mae: 24.5623 - 5s/epoch - 4ms/step

Epoch 11/25

1099/1099 - 5s - loss: 920.0767 - mse: 920.0767 - mae: 24.1808 - val\_loss: 939.2950 - val\_mse: 939.2950 - val\_mae: 24.9760 - 5s/epoch - 4ms/step

Epoch 12/25

1099/1099 - 5s - loss: 916.2521 - mse: 916.2521 - mae: 24.1042 - val\_loss: 917.4622 - val\_mse: 917.4622 - val\_mae: 24.4643 - 5s/epoch - 4ms/step

Epoch 13/25

1099/1099 - 5s - loss: 912.7730 - mse: 912.7730 - mae: 24.0294 - val\_loss: 922.3727 - val\_mse: 922.3727 - val\_mae: 24.5615 - 5s/epoch - 4ms/step

Epoch 14/25

1099/1099 - 5s - loss: 909.9955 - mse: 909.9955 - mae: 23.9493 - val\_loss: 888.0841 - val\_mse: 888.0841 - val\_mae: 23.6994 - 5s/epoch - 4ms/step

Epoch 15/25

1099/1099 - 5s - loss: 906.5883 - mse: 906.5883 - mae: 23.8907 - val\_loss: 870.2573 - val\_mse: 870.2573 - val\_mae: 23.1885 - 5s/epoch - 4ms/step

Epoch 16/25

1099/1099 - 5s - loss: 905.9901 - mse: 905.9901 - mae: 23.8674 - val\_loss: 889.2960 - val\_mse: 889.2960 - val\_mae: 23.6967 - 5s/epoch - 4ms/step

Epoch 17/25

1099/1099 - 5s - loss: 903.4323 - mse: 903.4323 - mae: 23.8325 - val\_loss: 881.3953 - val\_mse: 881.3953 - val\_mae: 23.5138 - 5s/epoch - 4ms/step

Epoch 18/25

1099/1099 - 5s - loss: 902.5614 - mse: 902.5614 - mae: 23.7865 - val\_loss: 857.6465 - val\_mse: 857.6465 - val\_mae: 22.8319 - 5s/epoch - 5ms/step

Epoch 19/25

1099/1099 - 5s - loss: 900.6430 - mse: 900.6430 - mae: 23.7681 - val\_loss: 902.0676 - val\_mse: 902.0676 - val\_mae: 24.0826 - 5s/epoch - 4ms/step

Epoch 20/25

1099/1099 - 5s - loss: 900.9426 - mse: 900.9426 - mae: 23.7547 - val\_loss: 866.8986 - val\_mse: 866.8986 - val\_mae: 23.0591 - 5s/epoch - 4ms/step

Epoch 21/25

1099/1099 - 5s - loss: 898.8696 - mse: 898.8696 - mae: 23.7199 - val\_loss: 860.7170 - val\_mse: 860.7170 - val\_mae: 22.9097 - 5s/epoch - 4ms/step

Epoch 22/25

1099/1099 - 5s - loss: 897.2820 - mse: 897.2820 - mae: 23.7051 - val\_loss: 844.9313 - val\_mse: 844.9313 - val\_mae: 22.4540 - 5s/epoch - 4ms/step

Epoch 23/25

1099/1099 - 5s - loss: 895.9755 - mse: 895.9755 - mae: 23.6674 - val\_loss: 848.7571 - val\_mse: 848.7571 - val\_mae: 22.5267 - 5s/epoch - 4ms/step

Epoch 24/25

1099/1099 - 5s - loss: 896.2991 - mse: 896.2991 - mae: 23.6496 - val\_loss: 847.1276 - val\_mse: 847.1276 - val\_mae: 22.5064 - 5s/epoch - 4ms/step

Epoch 25/25

1099/1099 - 5s - loss: 894.8743 - mse: 894.8743 - mae: 23.6353 - val\_loss: 863.4489 - val\_mse: 863.4489 - val\_mae: 22.9938 - 5s/epoch - 4ms/step

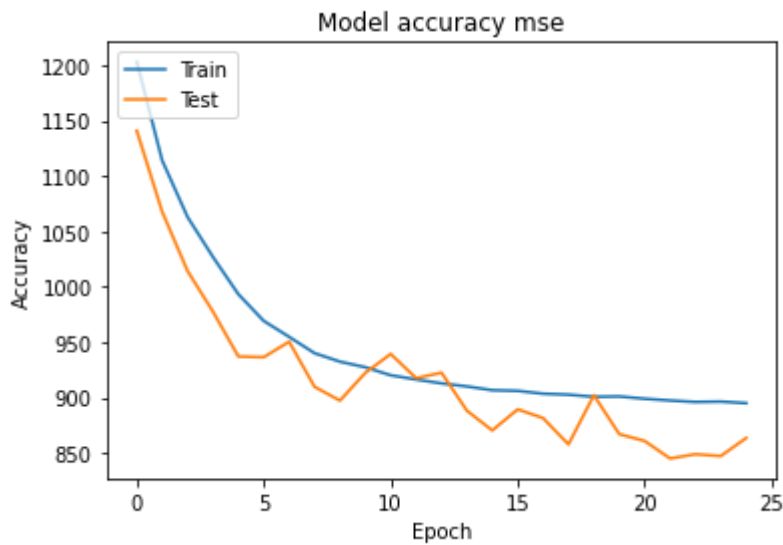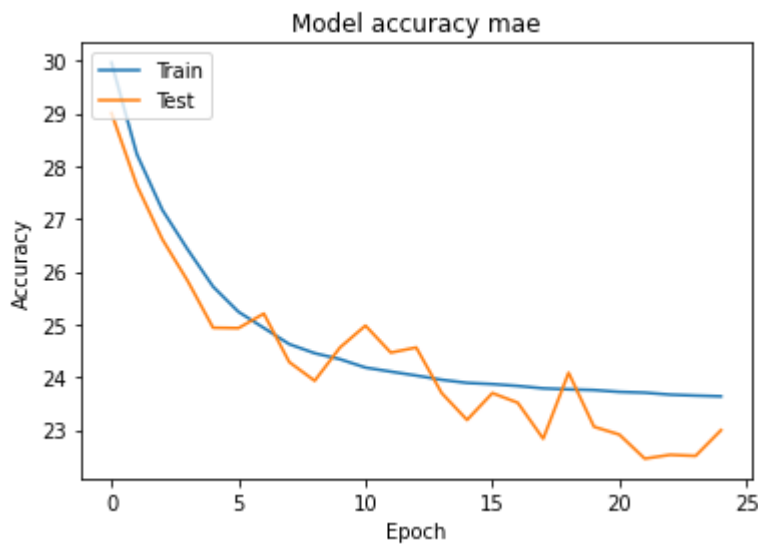

In [ ]:

```
print("Individual phase MLP")

layers = (40,10)
shape = (40,)
epochs = 100

model = create_mlp(shape, layers, True, "relu")
model.compile(loss='mean_squared_error', optimizer=opt, metrics=['mse', 'mae'])

history = model.fit(
    x= x_train_phase, y=y_train,
    validation_data=(x_test_phase, y_test),
    epochs=epochs, batch_size=64, verbose=2
)

display_graphs(history)
```

## Individual phase MLP

Epoch 1/100

1099/1099 - 2s - loss: 1220.7994 - mse: 1220.7994 - mae: 30.2646 - val\_loss: 1219.0101 - val\_mse: 1219.0101 - val\_mae: 30.2238 - 2s/epoch - 2ms/step

Epoch 2/100

1099/1099 - 2s - loss: 1220.1207 - mse: 1220.1207 - mae: 30.2566 - val\_loss: 1218.6829 - val\_mse: 1218.6829 - val\_mae: 30.2189 - 2s/epoch - 2ms/step

Epoch 3/100

1099/1099 - 2s - loss: 1219.4867 - mse: 1219.4867 - mae: 30.2477 - val\_loss: 1218.0746 - val\_mse: 1218.0746 - val\_mae: 30.2099 - 2s/epoch - 2ms/step

Epoch 4/100

1099/1099 - 2s - loss: 1218.8517 - mse: 1218.8517 - mae: 30.2390 - val\_loss: 1216.9022 - val\_mse: 1216.9022 - val\_mae: 30.1943 - 2s/epoch - 2ms/step

Epoch 5/100

1099/1099 - 2s - loss: 1217.2185 - mse: 1217.2185 - mae: 30.2120 - val\_loss: 1214.0962 - val\_mse: 1214.0962 - val\_mae: 30.1548 - 2s/epoch - 2ms/step

Epoch 6/100

1099/1099 - 2s - loss: 1214.6284 - mse: 1214.6284 - mae: 30.1688 - val\_loss: 1208.9874 - val\_mse: 1208.9874 - val\_mae: 30.0822 - 2s/epoch - 2ms/step

Epoch 7/100

1099/1099 - 2s - loss: 1210.0157 - mse: 1210.0157 - mae: 30.0976 - val\_loss: 1200.1415 - val\_mse: 1200.1415 - val\_mae: 29.9553 - 2s/epoch - 2ms/step

Epoch 8/100

1099/1099 - 2s - loss: 1201.8690 - mse: 1201.8690 - mae: 29.9602 - val\_loss: 1185.4940 - val\_mse: 1185.4940 - val\_mae: 29.7449 - 2s/epoch - 2ms/step

Epoch 9/100

1099/1099 - 2s - loss: 1191.2990 - mse: 1191.2990 - mae: 29.7913 - val\_loss: 1165.0873 - val\_mse: 1165.0873 - val\_mae: 29.4413 - 2s/epoch - 2ms/step

Epoch 10/100

1099/1099 - 2s - loss: 1175.6743 - mse: 1175.6743 - mae: 29.5177 - val\_loss: 1140.2939 - val\_mse: 1140.2939 - val\_mae: 29.0461 - 2s/epoch - 2ms/step

Epoch 11/100

1099/1099 - 2s - loss: 1158.3508 - mse: 1158.3508 - mae: 29.1980 - val\_loss: 1112.2144 - val\_mse: 1112.2144 - val\_mae: 28.5713 - 2s/epoch - 2ms/step

Epoch 12/100

1099/1099 - 2s - loss: 1138.4724 - mse: 1138.4724 - mae: 28.8123 - val\_loss: 1081.6156 - val\_mse: 1081.6156 - val\_mae: 28.0133 - 2s/epoch - 2ms/step

Epoch 13/100

1099/1099 - 2s - loss: 1120.9288 - mse: 1120.9288 - mae: 28.4275 - val\_loss: 1056.0359 - val\_mse: 1056.0359 - val\_mae: 27.5060 - 2s/epoch - 2ms/step

Epoch 14/100

1099/1099 - 2s - loss: 1101.6400 - mse: 1101.6400 - mae: 28.0541 - val\_loss: 1033.6732 - val\_mse: 1033.6732 - val\_mae: 27.0362 - 2s/epoch - 2ms/step

Epoch 15/100

1099/1099 - 2s - loss: 1085.2581 - mse: 1085.2581 - mae: 27.6882 - val\_loss: 1012.8392 - val\_mse: 1012.8392 - val\_mae: 26.5663 - 2s/epoch - 2ms/step

Epoch 16/100

1099/1099 - 2s - loss: 1070.3907 - mse: 1070.3907 - mae: 27.3776 - val\_loss: 996.7193 - val\_mse: 996.7193 - val\_mae: 26.2244 - 2s/epoch - 2ms/step

Epoch 17/100

1099/1099 - 2s - loss: 1060.3223 - mse: 1060.3223 - mae: 27.1376 - val\_loss: 982.4687 - val\_mse: 982.4687 - val\_mae: 25.8766 - 2s/epoch - 2ms/step

Epoch 18/100

1099/1099 - 2s - loss: 1050.6375 - mse: 1050.6375 - mae: 26.8975 - val\_loss: 970.7778 - val\_mse: 970.7778 - val\_mae: 25.6015 - 2s/epoch - 2ms/step

Epoch 19/100

1099/1099 - 2s - loss: 1038.8285 - mse: 1038.8285 - mae: 26.6628 - val\_loss: 959.8481 - val\_mse: 959.8481 - val\_mae: 25.3213 - 2s/epoch - 2ms/step

Epoch 20/100

1099/1099 - 2s - loss: 1032.2521 - mse: 1032.2521 - mae: 26.5072 - val\_loss: 954.7056 - val\_mse: 954.7056 - val\_mae: 25.1884 - 2s/epoch - 2ms/step

Epoch 21/100

1099/1099 - 2s - loss: 1026.1938 - mse: 1026.1938 - mae: 26.3651 - val\_loss: 947.3969 - val\_mse: 947.3969 - val\_mae: 25.0248 - 2s/epoch - 2ms/step

Epoch 22/100

1099/1099 - 2s - loss: 1019.5846 - mse: 1019.5846 - mae: 26.2230 - val\_loss: 942.9078 - val\_mse: 942.9078 - val\_mae: 24.9202 - 2s/epoch - 2ms/step

Epoch 23/100

1099/1099 - 2s - loss: 1014.6760 - mse: 1014.6760 - mae: 26.1266 - val\_loss: 931.1618 - val\_mse: 931.1618 - val\_mae: 24.5814 - 2s/epoch - 2ms/step

Epoch 24/100

1099/1099 - 2s - loss: 1012.2065 - mse: 1012.2065 - mae: 26.0079 - val\_loss: 927.3939 - val\_mse: 927.3939 - val\_mae: 24.5084 - 2s/epoch - 2ms/step

Epoch 25/100

1099/1099 - 2s - loss: 1007.4680 - mse: 1007.4680 - mae: 25.9142 - val\_loss: 927.9357 - val\_mse: 927.9357 - val\_mae: 24.5367 - 2s/epoch - 2ms/step

Epoch 26/100

1099/1099 - 2s - loss: 1001.3428 - mse: 1001.3428 - mae: 25.7978 - val\_loss: 918.6844 - val\_mse: 918.6844 - val\_mae: 24.2545 - 2s/epoch - 2ms/step

Epoch 27/100

1099/1099 - 2s - loss: 999.0605 - mse: 999.0605 - mae: 25.7626 - val\_loss: 915.8298 - val\_mse: 915.8298 - val\_mae: 24.1903 - 2s/epoch - 2ms/step

Epoch 28/100

1099/1099 - 2s - loss: 997.3719 - mse: 997.3719 - mae: 25.6927 - val\_loss: 916.0436 - val\_mse: 916.0436 - val\_mae: 24.2153 - 2s/epoch - 2ms/step

Epoch 29/100

1099/1099 - 2s - loss: 994.4683 - mse: 994.4683 - mae: 25.6185 - val\_loss: 915.2094 - val\_mse: 915.2094 - val\_mae: 24.2212 - 2s/epoch - 2ms/step

Epoch 30/100

1099/1099 - 2s - loss: 989.9358 - mse: 989.9358 - mae: 25.5440 - val\_loss: 911.7891 - val\_mse: 911.7891 - val\_mae: 24.0786 - 2s/epoch - 2ms/step

Epoch 31/100

1099/1099 - 2s - loss: 989.4338 - mse: 989.4338 - mae: 25.5108 - val\_loss: 911.5358 - val\_mse: 911.5358 - val\_mae: 24.1085 - 2s/epoch - 2ms/step

Epoch 32/100

1099/1099 - 2s - loss: 985.0543 - mse: 985.0543 - mae: 25.4161 - val\_loss: 905.3457 - val\_mse: 905.3457 - val\_mae: 23.9087 - 2s/epoch - 2ms/step

Epoch 33/100

1099/1099 - 2s - loss: 983.9442 - mse: 983.9442 - mae: 25.3890 - val\_loss: 906.1287 - val\_mse: 906.1287 - val\_mae: 23.9242 - 2s/epoch - 2ms/step

Epoch 34/100

1099/1099 - 2s - loss: 982.0063 - mse: 982.0063 - mae: 25.3572 - val\_loss: 903.2968 - val\_mse: 903.2968 - val\_mae: 23.8769 - 2s/epoch - 2ms/step

Epoch 35/100

1099/1099 - 2s - loss: 979.6460 - mse: 979.6460 - mae: 25.3098 - val\_loss: 902.8743 - val\_mse: 902.8743 - val\_mae: 23.8526 - 2s/epoch - 2ms/step

Epoch 36/100

1099/1099 - 2s - loss: 978.0568 - mse: 978.0568 - mae: 25.2750 - val\_loss: 898.6016 - val\_mse: 898.6016 - val\_mae: 23.7561 - 2s/epoch - 2ms/step

Epoch 37/100

1099/1099 - 2s - loss: 978.8148 - mse: 978.8148 - mae: 25.2869 - val\_loss: 900.2835 - val\_mse: 900.2835 - val\_mae: 23.7798 - 2s/epoch - 2ms/step

Epoch 38/100

1099/1099 - 2s - loss: 978.5563 - mse: 978.5563 - mae: 25.2631 - val\_loss: 901.2811 - val\_mse: 901.2811 - val\_mae: 23.8062 - 2s/epoch - 2ms/step

Epoch 39/100

1099/1099 - 2s - loss: 977.3940 - mse: 977.3940 - mae: 25.2432 - val\_loss: 897.2619 - val\_mse: 897.2619 - val\_mae: 23.6963 - 2s/epoch - 2ms/step

Epoch 40/100

1099/1099 - 2s - loss: 975.4884 - mse: 975.4884 - mae: 25.2216 - val\_loss: 901.4560 - val\_mse: 901.4560 - val\_mae: 23.7931 - 2s/epoch - 2ms/step

Epoch 41/100



1099/1099 - 2s - loss: 974.0361 - mse: 974.0361 - mae: 25.1718 - val\_loss: 891.1047 - val\_mse: 891.1047 - val\_mae: 23.5057 - 2s/epoch - 2ms/step  
Epoch 42/100  
1099/1099 - 2s - loss: 971.5655 - mse: 971.5655 - mae: 25.1343 - val\_loss: 893.9786 - val\_mse: 893.9786 - val\_mae: 23.6172 - 2s/epoch - 2ms/step  
Epoch 43/100  
1099/1099 - 2s - loss: 971.9574 - mse: 971.9574 - mae: 25.1415 - val\_loss: 891.4066 - val\_mse: 891.4066 - val\_mae: 23.5089 - 2s/epoch - 2ms/step  
Epoch 44/100  
1099/1099 - 2s - loss: 973.5356 - mse: 973.5356 - mae: 25.1523 - val\_loss: 894.1364 - val\_mse: 894.1364 - val\_mae: 23.6528 - 2s/epoch - 2ms/step  
Epoch 45/100  
1099/1099 - 2s - loss: 974.3461 - mse: 974.3461 - mae: 25.1631 - val\_loss: 889.3727 - val\_mse: 889.3727 - val\_mae: 23.4578 - 2s/epoch - 2ms/step  
Epoch 46/100  
1099/1099 - 2s - loss: 972.1186 - mse: 972.1186 - mae: 25.1329 - val\_loss: 890.2012 - val\_mse: 890.2012 - val\_mae: 23.5012 - 2s/epoch - 2ms/step  
Epoch 47/100  
1099/1099 - 2s - loss: 970.1096 - mse: 970.1096 - mae: 25.1059 - val\_loss: 892.5995 - val\_mse: 892.5995 - val\_mae: 23.5938 - 2s/epoch - 2ms/step  
Epoch 48/100  
1099/1099 - 2s - loss: 969.5078 - mse: 969.5078 - mae: 25.0995 - val\_loss: 889.3579 - val\_mse: 889.3579 - val\_mae: 23.4875 - 2s/epoch - 2ms/step  
Epoch 49/100  
1099/1099 - 2s - loss: 970.2609 - mse: 970.2609 - mae: 25.0915 - val\_loss: 898.5076 - val\_mse: 898.5076 - val\_mae: 23.6990 - 2s/epoch - 2ms/step  
Epoch 50/100  
1099/1099 - 2s - loss: 970.0972 - mse: 970.0972 - mae: 25.0952 - val\_loss: 891.5193 - val\_mse: 891.5193 - val\_mae: 23.5126 - 2s/epoch - 2ms/step  
Epoch 51/100  
1099/1099 - 2s - loss: 972.0975 - mse: 972.0975 - mae: 25.1100 - val\_loss: 891.6940 - val\_mse: 891.6940 - val\_mae: 23.5225 - 2s/epoch - 2ms/step  
Epoch 52/100  
1099/1099 - 2s - loss: 971.8251 - mse: 971.8251 - mae: 25.1294 - val\_loss: 894.1135 - val\_mse: 894.1135 - val\_mae: 23.5998 - 2s/epoch - 2ms/step  
Epoch 53/100  
1099/1099 - 2s - loss: 969.5180 - mse: 969.5180 - mae: 25.1008 - val\_loss: 892.4149 - val\_mse: 892.4149 - val\_mae: 23.5788 - 2s/epoch - 2ms/step  
Epoch 54/100  
1099/1099 - 2s - loss: 970.0803 - mse: 970.0803 - mae: 25.0857 - val\_loss: 892.9203 - val\_mse: 892.9203 - val\_mae: 23.6022 - 2s/epoch - 2ms/step  
Epoch 55/100  
1099/1099 - 2s - loss: 968.4579 - mse: 968.4579 - mae: 25.0629 - val\_loss: 891.8474 - val\_mse: 891.8474 - val\_mae: 23.5584 - 2s/epoch - 2ms/step  
Epoch 56/100  
1099/1099 - 2s - loss: 969.3886 - mse: 969.3886 - mae: 25.0783 - val\_loss: 890.6089 - val\_mse: 890.6089 - val\_mae: 23.5039 - 2s/epoch - 2ms/step  
Epoch 57/100  
1099/1099 - 2s - loss: 966.5508 - mse: 966.5508 - mae: 25.0212 - val\_loss: 889.3111 - val\_mse: 889.3111 - val\_mae: 23.4881 - 2s/epoch - 2ms/step  
Epoch 58/100  
1099/1099 - 2s - loss: 968.2852 - mse: 968.2852 - mae: 25.0514 - val\_loss: 891.6725 - val\_mse: 891.6725 - val\_mae: 23.5135 - 2s/epoch - 2ms/step  
Epoch 59/100  
1099/1099 - 2s - loss: 966.8228 - mse: 966.8228 - mae: 25.0260 - val\_loss: 893.2197 - val\_mse: 893.2197 - val\_mae: 23.6044 - 2s/epoch - 2ms/step  
Epoch 60/100  
1099/1099 - 2s - loss: 968.1570 - mse: 968.1570 - mae: 25.0512 - val\_loss: 888.5425 - val\_mse: 888.5425 - val\_mae: 23.4525 - 2s/epoch - 2ms/step  
Epoch 61/100  
1099/1099 - 2s - loss: 969.4621 - mse: 969.4621 - mae: 25.0721 - val\_loss:

892.6307 - val\_mse: 892.6307 - val\_mae: 23.5911 - 2s/epoch - 2ms/step  
Epoch 62/100  
1099/1099 - 2s - loss: 967.4570 - mse: 967.4570 - mae: 25.0462 - val\_loss:  
890.0200 - val\_mse: 890.0200 - val\_mae: 23.5247 - 2s/epoch - 2ms/step  
Epoch 63/100  
1099/1099 - 2s - loss: 966.7222 - mse: 966.7222 - mae: 25.0336 - val\_loss:  
889.0497 - val\_mse: 889.0497 - val\_mae: 23.5106 - 2s/epoch - 2ms/step  
Epoch 64/100  
1099/1099 - 2s - loss: 966.8611 - mse: 966.8611 - mae: 25.0302 - val\_loss:  
888.8545 - val\_mse: 888.8545 - val\_mae: 23.4829 - 2s/epoch - 2ms/step  
Epoch 65/100  
1099/1099 - 2s - loss: 965.4315 - mse: 965.4315 - mae: 24.9790 - val\_loss:  
884.7938 - val\_mse: 884.7938 - val\_mae: 23.3705 - 2s/epoch - 2ms/step  
Epoch 66/100  
1099/1099 - 2s - loss: 966.5607 - mse: 966.5607 - mae: 25.0472 - val\_loss:  
890.1377 - val\_mse: 890.1377 - val\_mae: 23.5305 - 2s/epoch - 2ms/step  
Epoch 67/100  
1099/1099 - 2s - loss: 966.4540 - mse: 966.4540 - mae: 25.0158 - val\_loss:  
890.7574 - val\_mse: 890.7574 - val\_mae: 23.5270 - 2s/epoch - 2ms/step  
Epoch 68/100  
1099/1099 - 2s - loss: 965.4521 - mse: 965.4521 - mae: 24.9906 - val\_loss:  
890.6625 - val\_mse: 890.6625 - val\_mae: 23.5405 - 2s/epoch - 2ms/step  
Epoch 69/100  
1099/1099 - 2s - loss: 964.5867 - mse: 964.5867 - mae: 24.9867 - val\_loss:  
886.2676 - val\_mse: 886.2676 - val\_mae: 23.4058 - 2s/epoch - 2ms/step  
Epoch 70/100  
1099/1099 - 2s - loss: 967.7299 - mse: 967.7299 - mae: 25.0356 - val\_loss:  
883.0703 - val\_mse: 883.0703 - val\_mae: 23.2999 - 2s/epoch - 2ms/step  
Epoch 71/100  
1099/1099 - 2s - loss: 964.2249 - mse: 964.2249 - mae: 24.9812 - val\_loss:  
885.4985 - val\_mse: 885.4985 - val\_mae: 23.4100 - 2s/epoch - 2ms/step  
Epoch 72/100  
1099/1099 - 2s - loss: 961.5230 - mse: 961.5230 - mae: 24.9224 - val\_loss:  
885.4434 - val\_mse: 885.4434 - val\_mae: 23.3898 - 2s/epoch - 2ms/step  
Epoch 73/100  
1099/1099 - 2s - loss: 964.3578 - mse: 964.3578 - mae: 24.9719 - val\_loss:  
885.1948 - val\_mse: 885.1948 - val\_mae: 23.3661 - 2s/epoch - 2ms/step  
Epoch 74/100  
1099/1099 - 2s - loss: 964.3696 - mse: 964.3696 - mae: 24.9778 - val\_loss:  
889.7591 - val\_mse: 889.7591 - val\_mae: 23.5112 - 2s/epoch - 2ms/step  
Epoch 75/100  
1099/1099 - 2s - loss: 964.2675 - mse: 964.2675 - mae: 24.9677 - val\_loss:  
887.6771 - val\_mse: 887.6771 - val\_mae: 23.4663 - 2s/epoch - 2ms/step  
Epoch 76/100  
1099/1099 - 2s - loss: 963.1295 - mse: 963.1295 - mae: 24.9544 - val\_loss:  
886.9170 - val\_mse: 886.9170 - val\_mae: 23.4347 - 2s/epoch - 2ms/step  
Epoch 77/100  
1099/1099 - 2s - loss: 962.4908 - mse: 962.4908 - mae: 24.9363 - val\_loss:  
885.7575 - val\_mse: 885.7575 - val\_mae: 23.3658 - 2s/epoch - 2ms/step  
Epoch 78/100  
1099/1099 - 2s - loss: 963.7051 - mse: 963.7051 - mae: 24.9414 - val\_loss:  
885.3516 - val\_mse: 885.3516 - val\_mae: 23.3650 - 2s/epoch - 2ms/step  
Epoch 79/100  
1099/1099 - 2s - loss: 961.4488 - mse: 961.4488 - mae: 24.9145 - val\_loss:  
887.3421 - val\_mse: 887.3421 - val\_mae: 23.4510 - 2s/epoch - 2ms/step  
Epoch 80/100  
1099/1099 - 2s - loss: 963.2063 - mse: 963.2063 - mae: 24.9364 - val\_loss:  
890.1075 - val\_mse: 890.1075 - val\_mae: 23.5206 - 2s/epoch - 2ms/step  
Epoch 81/100  
1099/1099 - 2s - loss: 962.6424 - mse: 962.6424 - mae: 24.9203 - val\_loss:  
885.6673 - val\_mse: 885.6673 - val\_mae: 23.4404 - 2s/epoch - 2ms/step

Epoch 82/100

1099/1099 - 2s - loss: 960.9761 - mse: 960.9761 - mae: 24.9036 - val\_loss: 884.7856 - val\_mse: 884.7856 - val\_mae: 23.3886 - 2s/epoch - 2ms/step

Epoch 83/100

1099/1099 - 2s - loss: 961.6438 - mse: 961.6438 - mae: 24.9090 - val\_loss: 881.3885 - val\_mse: 881.3885 - val\_mae: 23.2523 - 2s/epoch - 2ms/step

Epoch 84/100

1099/1099 - 2s - loss: 961.5080 - mse: 961.5080 - mae: 24.9022 - val\_loss: 885.8851 - val\_mse: 885.8851 - val\_mae: 23.4222 - 2s/epoch - 2ms/step

Epoch 85/100

1099/1099 - 2s - loss: 960.5123 - mse: 960.5123 - mae: 24.8758 - val\_loss: 880.8307 - val\_mse: 880.8307 - val\_mae: 23.2547 - 2s/epoch - 2ms/step

Epoch 86/100

1099/1099 - 2s - loss: 959.0917 - mse: 959.0917 - mae: 24.8750 - val\_loss: 883.4612 - val\_mse: 883.4612 - val\_mae: 23.3731 - 2s/epoch - 2ms/step

Epoch 87/100

1099/1099 - 2s - loss: 958.5144 - mse: 958.5144 - mae: 24.8507 - val\_loss: 881.5181 - val\_mse: 881.5181 - val\_mae: 23.2980 - 2s/epoch - 2ms/step

Epoch 88/100

1099/1099 - 2s - loss: 961.8716 - mse: 961.8716 - mae: 24.9148 - val\_loss: 883.5326 - val\_mse: 883.5326 - val\_mae: 23.3896 - 2s/epoch - 2ms/step

Epoch 89/100

1099/1099 - 2s - loss: 960.0946 - mse: 960.0946 - mae: 24.8905 - val\_loss: 883.6638 - val\_mse: 883.6638 - val\_mae: 23.3681 - 2s/epoch - 2ms/step

Epoch 90/100

1099/1099 - 2s - loss: 961.1993 - mse: 961.1993 - mae: 24.8960 - val\_loss: 881.8096 - val\_mse: 881.8096 - val\_mae: 23.2864 - 2s/epoch - 2ms/step

Epoch 91/100

1099/1099 - 2s - loss: 960.0361 - mse: 960.0361 - mae: 24.8691 - val\_loss: 885.7777 - val\_mse: 885.7777 - val\_mae: 23.4533 - 2s/epoch - 2ms/step

Epoch 92/100

1099/1099 - 2s - loss: 959.9489 - mse: 959.9489 - mae: 24.8713 - val\_loss: 884.4258 - val\_mse: 884.4258 - val\_mae: 23.3803 - 2s/epoch - 2ms/step

Epoch 93/100

1099/1099 - 2s - loss: 960.7307 - mse: 960.7307 - mae: 24.9116 - val\_loss: 883.9259 - val\_mse: 883.9259 - val\_mae: 23.3614 - 2s/epoch - 2ms/step

Epoch 94/100

1099/1099 - 2s - loss: 958.0213 - mse: 958.0213 - mae: 24.8655 - val\_loss: 880.6465 - val\_mse: 880.6465 - val\_mae: 23.2300 - 2s/epoch - 2ms/step

Epoch 95/100

1099/1099 - 2s - loss: 958.5931 - mse: 958.5931 - mae: 24.8594 - val\_loss: 882.8694 - val\_mse: 882.8694 - val\_mae: 23.3346 - 2s/epoch - 2ms/step

Epoch 96/100

1099/1099 - 2s - loss: 958.3566 - mse: 958.3566 - mae: 24.8703 - val\_loss: 886.8538 - val\_mse: 886.8538 - val\_mae: 23.4518 - 2s/epoch - 2ms/step

Epoch 97/100

1099/1099 - 2s - loss: 959.7771 - mse: 959.7771 - mae: 24.8805 - val\_loss: 884.8133 - val\_mse: 884.8133 - val\_mae: 23.3573 - 2s/epoch - 2ms/step

Epoch 98/100

1099/1099 - 2s - loss: 958.7736 - mse: 958.7736 - mae: 24.8466 - val\_loss: 884.6906 - val\_mse: 884.6906 - val\_mae: 23.3938 - 2s/epoch - 2ms/step

Epoch 99/100

1099/1099 - 2s - loss: 958.8351 - mse: 958.8351 - mae: 24.8700 - val\_loss: 883.6988 - val\_mse: 883.6988 - val\_mae: 23.3576 - 2s/epoch - 2ms/step

Epoch 100/100

1099/1099 - 2s - loss: 959.3964 - mse: 959.3964 - mae: 24.8648 - val\_loss: 885.9979 - val\_mse: 885.9979 - val\_mae: 23.4285 - 2s/epoch - 2ms/step

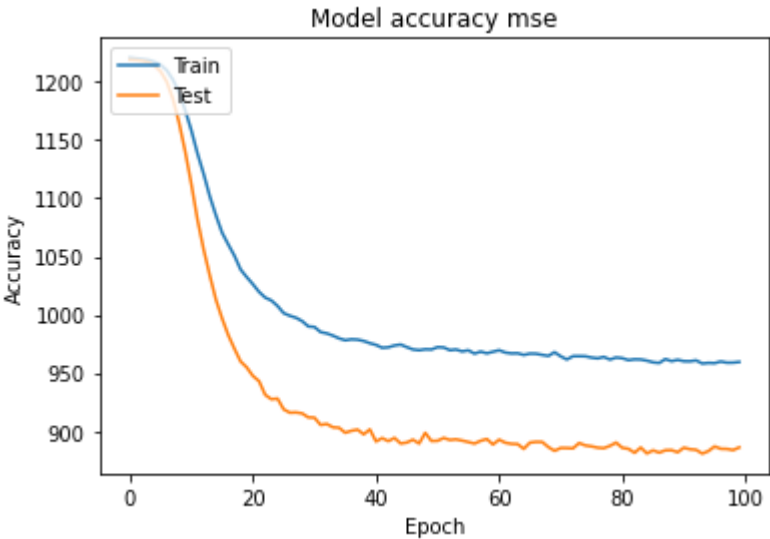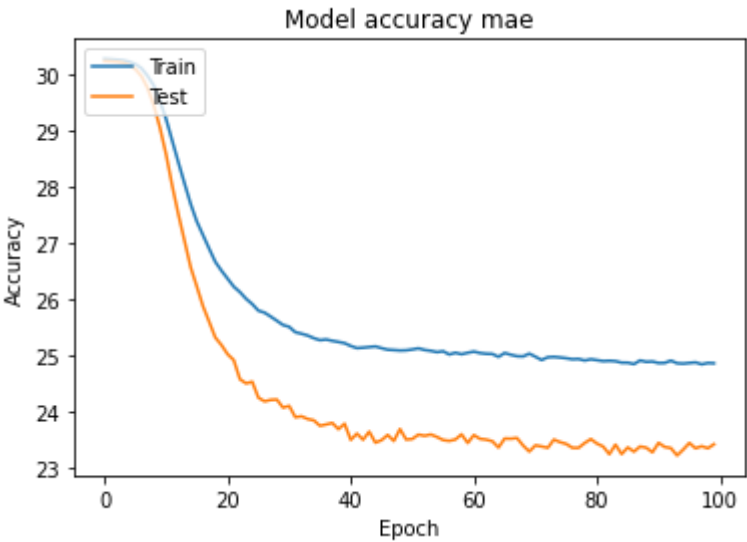

In [ ]:

```
print("Individual magnitude MLP")

layers = (40,10)
shape = (40,)
epochs = 100
model = create_mlp(shape, layers, True, "relu")
model.compile(loss='mean_squared_error', optimizer=opt, metrics=['mse', 'mae'])

history = model.fit(
    x= x_train_magnitude, y=y_train,
    validation_data=(x_test_magnitude, y_test),
    epochs=epochs, batch_size=64, verbose=2
)

display_graphs(history)
```

## Individual magnitude MLP

Epoch 1/100

1099/1099 - 3s - loss: 1220.2557 - mse: 1220.2557 - mae: 30.2592 - val\_loss: 1218.2856 - val\_mse: 1218.2856 - val\_mae: 30.2149 - 3s/epoch - 2ms/step

Epoch 2/100

1099/1099 - 2s - loss: 1219.3306 - mse: 1219.3306 - mae: 30.2459 - val\_loss: 1217.6312 - val\_mse: 1217.6312 - val\_mae: 30.2051 - 2s/epoch - 2ms/step

Epoch 3/100

1099/1099 - 2s - loss: 1218.5815 - mse: 1218.5815 - mae: 30.2347 - val\_loss: 1216.7948 - val\_mse: 1216.7948 - val\_mae: 30.1923 - 2s/epoch - 2ms/step

Epoch 4/100

1099/1099 - 2s - loss: 1217.4507 - mse: 1217.4507 - mae: 30.2172 - val\_loss: 1215.3491 - val\_mse: 1215.3491 - val\_mae: 30.1700 - 2s/epoch - 2ms/step

Epoch 5/100

1099/1099 - 2s - loss: 1215.6976 - mse: 1215.6976 - mae: 30.1881 - val\_loss: 1212.8698 - val\_mse: 1212.8698 - val\_mae: 30.1329 - 2s/epoch - 2ms/step

Epoch 6/100

1099/1099 - 2s - loss: 1213.4624 - mse: 1213.4624 - mae: 30.1493 - val\_loss: 1207.9664 - val\_mse: 1207.9664 - val\_mae: 30.0620 - 2s/epoch - 2ms/step

Epoch 7/100

1099/1099 - 2s - loss: 1208.3265 - mse: 1208.3265 - mae: 30.0630 - val\_loss: 1198.7013 - val\_mse: 1198.7013 - val\_mae: 29.9214 - 2s/epoch - 2ms/step

Epoch 8/100

1099/1099 - 2s - loss: 1200.3424 - mse: 1200.3424 - mae: 29.9280 - val\_loss: 1185.4648 - val\_mse: 1185.4648 - val\_mae: 29.7259 - 2s/epoch - 2ms/step

Epoch 9/100

1099/1099 - 2s - loss: 1188.2352 - mse: 1188.2352 - mae: 29.7177 - val\_loss: 1163.8896 - val\_mse: 1163.8896 - val\_mae: 29.3856 - 2s/epoch - 2ms/step

Epoch 10/100

1099/1099 - 2s - loss: 1170.2524 - mse: 1170.2524 - mae: 29.4052 - val\_loss: 1135.7555 - val\_mse: 1135.7555 - val\_mae: 28.9127 - 2s/epoch - 2ms/step

Epoch 11/100

1099/1099 - 2s - loss: 1146.0847 - mse: 1146.0847 - mae: 28.9334 - val\_loss: 1100.5253 - val\_mse: 1100.5253 - val\_mae: 28.2706 - 2s/epoch - 2ms/step

Epoch 12/100

1099/1099 - 2s - loss: 1120.6426 - mse: 1120.6426 - mae: 28.4319 - val\_loss: 1065.0449 - val\_mse: 1065.0449 - val\_mae: 27.5648 - 2s/epoch - 2ms/step

Epoch 13/100

1099/1099 - 2s - loss: 1093.5935 - mse: 1093.5935 - mae: 27.8481 - val\_loss: 1032.1112 - val\_mse: 1032.1112 - val\_mae: 26.8258 - 2s/epoch - 2ms/step

Epoch 14/100

1099/1099 - 2s - loss: 1067.4276 - mse: 1067.4276 - mae: 27.2741 - val\_loss: 1014.0146 - val\_mse: 1014.0146 - val\_mae: 26.4349 - 2s/epoch - 2ms/step

Epoch 15/100

1099/1099 - 2s - loss: 1047.6633 - mse: 1047.6633 - mae: 26.8232 - val\_loss: 987.7766 - val\_mse: 987.7766 - val\_mae: 25.7904 - 2s/epoch - 2ms/step

Epoch 16/100

1099/1099 - 2s - loss: 1034.3948 - mse: 1034.3948 - mae: 26.5189 - val\_loss: 970.4828 - val\_mse: 970.4828 - val\_mae: 25.3757 - 2s/epoch - 2ms/step

Epoch 17/100

1099/1099 - 2s - loss: 1023.3001 - mse: 1023.3001 - mae: 26.2418 - val\_loss: 960.2880 - val\_mse: 960.2880 - val\_mae: 25.1080 - 2s/epoch - 2ms/step

Epoch 18/100

1099/1099 - 2s - loss: 1015.7160 - mse: 1015.7160 - mae: 26.0718 - val\_loss: 952.1559 - val\_mse: 952.1559 - val\_mae: 24.9322 - 2s/epoch - 2ms/step

Epoch 19/100

1099/1099 - 2s - loss: 1007.2747 - mse: 1007.2747 - mae: 25.8845 - val\_loss: 943.1976 - val\_mse: 943.1976 - val\_mae: 24.7083 - 2s/epoch - 2ms/step

Epoch 20/100

1099/1099 - 2s - loss: 999.9457 - mse: 999.9457 - mae: 25.7493 - val\_loss: 939.4337 - val\_mse: 939.4337 - val\_mae: 24.5636 - 2s/epoch - 2ms/step

Epoch 21/100

1099/1099 - 2s - loss: 995.2439 - mse: 995.2439 - mae: 25.6316 - val\_loss: 931.9474 - val\_mse: 931.9474 - val\_mae: 24.3956 - 2s/epoch - 2ms/step

Epoch 22/100

1099/1099 - 2s - loss: 990.1621 - mse: 990.1621 - mae: 25.5175 - val\_loss: 931.9622 - val\_mse: 931.9622 - val\_mae: 24.3584 - 2s/epoch - 2ms/step

Epoch 23/100

1099/1099 - 2s - loss: 986.3395 - mse: 986.3395 - mae: 25.4524 - val\_loss: 923.3311 - val\_mse: 923.3311 - val\_mae: 24.1685 - 2s/epoch - 2ms/step

Epoch 24/100

1099/1099 - 2s - loss: 985.0370 - mse: 985.0370 - mae: 25.4221 - val\_loss: 921.6813 - val\_mse: 921.6813 - val\_mae: 24.1278 - 2s/epoch - 2ms/step

Epoch 25/100

1099/1099 - 2s - loss: 982.9198 - mse: 982.9198 - mae: 25.3454 - val\_loss: 923.5245 - val\_mse: 923.5245 - val\_mae: 24.1849 - 2s/epoch - 2ms/step

Epoch 26/100

1099/1099 - 2s - loss: 978.4804 - mse: 978.4804 - mae: 25.2673 - val\_loss: 920.8469 - val\_mse: 920.8469 - val\_mae: 24.0939 - 2s/epoch - 2ms/step

Epoch 27/100

1099/1099 - 2s - loss: 976.8064 - mse: 976.8064 - mae: 25.2325 - val\_loss: 917.7762 - val\_mse: 917.7762 - val\_mae: 24.0547 - 2s/epoch - 2ms/step

Epoch 28/100

1099/1099 - 2s - loss: 974.7880 - mse: 974.7880 - mae: 25.1920 - val\_loss: 908.2974 - val\_mse: 908.2974 - val\_mae: 23.8070 - 2s/epoch - 2ms/step

Epoch 29/100

1099/1099 - 2s - loss: 972.5767 - mse: 972.5767 - mae: 25.1424 - val\_loss: 911.6095 - val\_mse: 911.6095 - val\_mae: 23.9607 - 2s/epoch - 2ms/step

Epoch 30/100

1099/1099 - 2s - loss: 972.4830 - mse: 972.4830 - mae: 25.1342 - val\_loss: 911.1509 - val\_mse: 911.1509 - val\_mae: 23.9334 - 2s/epoch - 2ms/step

Epoch 31/100

1099/1099 - 2s - loss: 967.6675 - mse: 967.6675 - mae: 25.0527 - val\_loss: 905.3203 - val\_mse: 905.3203 - val\_mae: 23.7792 - 2s/epoch - 2ms/step

Epoch 32/100

1099/1099 - 2s - loss: 967.5992 - mse: 967.5992 - mae: 25.0402 - val\_loss: 908.3079 - val\_mse: 908.3079 - val\_mae: 23.8312 - 2s/epoch - 2ms/step

Epoch 33/100

1099/1099 - 2s - loss: 964.8047 - mse: 964.8047 - mae: 24.9931 - val\_loss: 903.5099 - val\_mse: 903.5099 - val\_mae: 23.7421 - 2s/epoch - 2ms/step

Epoch 34/100

1099/1099 - 2s - loss: 964.9670 - mse: 964.9670 - mae: 24.9831 - val\_loss: 905.6059 - val\_mse: 905.6059 - val\_mae: 23.8168 - 2s/epoch - 2ms/step

Epoch 35/100

1099/1099 - 2s - loss: 964.0454 - mse: 964.0454 - mae: 24.9971 - val\_loss: 896.8386 - val\_mse: 896.8386 - val\_mae: 23.5352 - 2s/epoch - 2ms/step

Epoch 36/100

1099/1099 - 2s - loss: 961.4042 - mse: 961.4042 - mae: 24.9212 - val\_loss: 896.6725 - val\_mse: 896.6725 - val\_mae: 23.5395 - 2s/epoch - 2ms/step

Epoch 37/100

1099/1099 - 2s - loss: 961.5294 - mse: 961.5294 - mae: 24.9275 - val\_loss: 899.2841 - val\_mse: 899.2841 - val\_mae: 23.6008 - 2s/epoch - 2ms/step

Epoch 38/100

1099/1099 - 2s - loss: 958.0375 - mse: 958.0375 - mae: 24.8333 - val\_loss: 895.1096 - val\_mse: 895.1096 - val\_mae: 23.5114 - 2s/epoch - 2ms/step

Epoch 39/100

1099/1099 - 2s - loss: 959.5217 - mse: 959.5217 - mae: 24.8629 - val\_loss: 899.4780 - val\_mse: 899.4780 - val\_mae: 23.6326 - 2s/epoch - 2ms/step

Epoch 40/100

1099/1099 - 2s - loss: 957.7942 - mse: 957.7942 - mae: 24.8461 - val\_loss: 894.9993 - val\_mse: 894.9993 - val\_mae: 23.5276 - 2s/epoch - 2ms/step

Epoch 41/100

1099/1099 - 2s - loss: 958.5789 - mse: 958.5789 - mae: 24.8562 - val\_loss: 895.1379 - val\_mse: 895.1379 - val\_mae: 23.5499 - 2s/epoch - 2ms/step  
Epoch 42/100  
1099/1099 - 2s - loss: 954.5648 - mse: 954.5648 - mae: 24.7958 - val\_loss: 890.9953 - val\_mse: 890.9953 - val\_mae: 23.4350 - 2s/epoch - 2ms/step  
Epoch 43/100  
1099/1099 - 2s - loss: 954.8863 - mse: 954.8863 - mae: 24.7893 - val\_loss: 894.0546 - val\_mse: 894.0546 - val\_mae: 23.5062 - 2s/epoch - 2ms/step  
Epoch 44/100  
1099/1099 - 2s - loss: 954.4087 - mse: 954.4087 - mae: 24.7745 - val\_loss: 891.4577 - val\_mse: 891.4577 - val\_mae: 23.4812 - 2s/epoch - 2ms/step  
Epoch 45/100  
1099/1099 - 2s - loss: 953.3613 - mse: 953.3613 - mae: 24.7946 - val\_loss: 889.6320 - val\_mse: 889.6320 - val\_mae: 23.3639 - 2s/epoch - 2ms/step  
Epoch 46/100  
1099/1099 - 2s - loss: 954.9649 - mse: 954.9649 - mae: 24.7896 - val\_loss: 892.5333 - val\_mse: 892.5333 - val\_mae: 23.4746 - 2s/epoch - 2ms/step  
Epoch 47/100  
1099/1099 - 2s - loss: 953.5874 - mse: 953.5874 - mae: 24.7586 - val\_loss: 889.2858 - val\_mse: 889.2858 - val\_mae: 23.3989 - 2s/epoch - 2ms/step  
Epoch 48/100  
1099/1099 - 2s - loss: 952.6707 - mse: 952.6707 - mae: 24.7429 - val\_loss: 892.0638 - val\_mse: 892.0638 - val\_mae: 23.4307 - 2s/epoch - 2ms/step  
Epoch 49/100  
1099/1099 - 2s - loss: 951.7842 - mse: 951.7842 - mae: 24.7297 - val\_loss: 890.6095 - val\_mse: 890.6095 - val\_mae: 23.4229 - 2s/epoch - 2ms/step  
Epoch 50/100  
1099/1099 - 2s - loss: 948.7783 - mse: 948.7783 - mae: 24.6667 - val\_loss: 886.4965 - val\_mse: 886.4965 - val\_mae: 23.3330 - 2s/epoch - 2ms/step  
Epoch 51/100  
1099/1099 - 2s - loss: 952.1193 - mse: 952.1193 - mae: 24.7293 - val\_loss: 888.7664 - val\_mse: 888.7664 - val\_mae: 23.3293 - 2s/epoch - 2ms/step  
Epoch 52/100  
1099/1099 - 2s - loss: 950.1282 - mse: 950.1282 - mae: 24.7053 - val\_loss: 887.4489 - val\_mse: 887.4489 - val\_mae: 23.3569 - 2s/epoch - 2ms/step  
Epoch 53/100  
1099/1099 - 2s - loss: 951.1987 - mse: 951.1987 - mae: 24.6988 - val\_loss: 890.6138 - val\_mse: 890.6138 - val\_mae: 23.4464 - 2s/epoch - 2ms/step  
Epoch 54/100  
1099/1099 - 2s - loss: 950.5886 - mse: 950.5886 - mae: 24.6892 - val\_loss: 888.7913 - val\_mse: 888.7913 - val\_mae: 23.4049 - 2s/epoch - 2ms/step  
Epoch 55/100  
1099/1099 - 2s - loss: 949.2623 - mse: 949.2623 - mae: 24.6894 - val\_loss: 884.3528 - val\_mse: 884.3528 - val\_mae: 23.2614 - 2s/epoch - 2ms/step  
Epoch 56/100  
1099/1099 - 2s - loss: 950.9664 - mse: 950.9664 - mae: 24.6925 - val\_loss: 882.9481 - val\_mse: 882.9481 - val\_mae: 23.1884 - 2s/epoch - 2ms/step  
Epoch 57/100  
1099/1099 - 2s - loss: 949.0569 - mse: 949.0569 - mae: 24.6633 - val\_loss: 885.0074 - val\_mse: 885.0074 - val\_mae: 23.2932 - 2s/epoch - 2ms/step  
Epoch 58/100  
1099/1099 - 2s - loss: 947.9716 - mse: 947.9716 - mae: 24.6648 - val\_loss: 885.3736 - val\_mse: 885.3736 - val\_mae: 23.3160 - 2s/epoch - 2ms/step  
Epoch 59/100  
1099/1099 - 2s - loss: 948.3924 - mse: 948.3924 - mae: 24.6706 - val\_loss: 884.7206 - val\_mse: 884.7206 - val\_mae: 23.2717 - 2s/epoch - 2ms/step  
Epoch 60/100  
1099/1099 - 2s - loss: 949.7991 - mse: 949.7991 - mae: 24.6678 - val\_loss: 887.0705 - val\_mse: 887.0705 - val\_mae: 23.3330 - 2s/epoch - 2ms/step  
Epoch 61/100  
1099/1099 - 2s - loss: 947.2445 - mse: 947.2445 - mae: 24.6365 - val\_loss:



884.7155 - val\_mse: 884.7155 - val\_mae: 23.3074 - 2s/epoch - 2ms/step  
Epoch 62/100  
1099/1099 - 2s - loss: 947.1879 - mse: 947.1879 - mae: 24.6420 - val\_loss:  
881.6384 - val\_mse: 881.6384 - val\_mae: 23.2374 - 2s/epoch - 2ms/step  
Epoch 63/100  
1099/1099 - 2s - loss: 947.6479 - mse: 947.6479 - mae: 24.6352 - val\_loss:  
882.3479 - val\_mse: 882.3479 - val\_mae: 23.2013 - 2s/epoch - 2ms/step  
Epoch 64/100  
1099/1099 - 2s - loss: 946.1750 - mse: 946.1750 - mae: 24.6163 - val\_loss:  
881.3081 - val\_mse: 881.3081 - val\_mae: 23.2356 - 2s/epoch - 2ms/step  
Epoch 65/100  
1099/1099 - 2s - loss: 946.4178 - mse: 946.4178 - mae: 24.6042 - val\_loss:  
880.5952 - val\_mse: 880.5952 - val\_mae: 23.1753 - 2s/epoch - 2ms/step  
Epoch 66/100  
1099/1099 - 2s - loss: 946.8653 - mse: 946.8653 - mae: 24.6192 - val\_loss:  
880.2178 - val\_mse: 880.2178 - val\_mae: 23.1703 - 2s/epoch - 2ms/step  
Epoch 67/100  
1099/1099 - 2s - loss: 944.3074 - mse: 944.3074 - mae: 24.5858 - val\_loss:  
879.6168 - val\_mse: 879.6168 - val\_mae: 23.1732 - 2s/epoch - 2ms/step  
Epoch 68/100  
1099/1099 - 2s - loss: 946.1509 - mse: 946.1509 - mae: 24.5977 - val\_loss:  
879.8741 - val\_mse: 879.8741 - val\_mae: 23.1681 - 2s/epoch - 2ms/step  
Epoch 69/100  
1099/1099 - 2s - loss: 945.4121 - mse: 945.4121 - mae: 24.6047 - val\_loss:  
880.7360 - val\_mse: 880.7360 - val\_mae: 23.1821 - 2s/epoch - 2ms/step  
Epoch 70/100  
1099/1099 - 2s - loss: 946.1823 - mse: 946.1823 - mae: 24.6035 - val\_loss:  
880.7427 - val\_mse: 880.7427 - val\_mae: 23.2038 - 2s/epoch - 2ms/step  
Epoch 71/100  
1099/1099 - 2s - loss: 946.4646 - mse: 946.4646 - mae: 24.6111 - val\_loss:  
882.5370 - val\_mse: 882.5370 - val\_mae: 23.3179 - 2s/epoch - 2ms/step  
Epoch 72/100  
1099/1099 - 2s - loss: 942.2028 - mse: 942.2028 - mae: 24.5477 - val\_loss:  
879.2086 - val\_mse: 879.2086 - val\_mae: 23.1718 - 2s/epoch - 2ms/step  
Epoch 73/100  
1099/1099 - 2s - loss: 944.8148 - mse: 944.8148 - mae: 24.5687 - val\_loss:  
876.7322 - val\_mse: 876.7322 - val\_mae: 23.1387 - 2s/epoch - 2ms/step  
Epoch 74/100  
1099/1099 - 2s - loss: 945.7991 - mse: 945.7991 - mae: 24.6065 - val\_loss:  
878.8499 - val\_mse: 878.8499 - val\_mae: 23.1376 - 2s/epoch - 2ms/step  
Epoch 75/100  
1099/1099 - 2s - loss: 944.0353 - mse: 944.0353 - mae: 24.5748 - val\_loss:  
880.8234 - val\_mse: 880.8234 - val\_mae: 23.1810 - 2s/epoch - 2ms/step  
Epoch 76/100  
1099/1099 - 2s - loss: 944.0222 - mse: 944.0222 - mae: 24.5653 - val\_loss:  
878.8048 - val\_mse: 878.8048 - val\_mae: 23.1392 - 2s/epoch - 2ms/step  
Epoch 77/100  
1099/1099 - 2s - loss: 943.0704 - mse: 943.0704 - mae: 24.5515 - val\_loss:  
876.2884 - val\_mse: 876.2884 - val\_mae: 23.0766 - 2s/epoch - 2ms/step  
Epoch 78/100  
1099/1099 - 2s - loss: 941.3682 - mse: 941.3682 - mae: 24.5126 - val\_loss:  
876.2550 - val\_mse: 876.2550 - val\_mae: 23.0912 - 2s/epoch - 2ms/step  
Epoch 79/100  
1099/1099 - 2s - loss: 945.4991 - mse: 945.4991 - mae: 24.5790 - val\_loss:  
880.7974 - val\_mse: 880.7974 - val\_mae: 23.2276 - 2s/epoch - 2ms/step  
Epoch 80/100  
1099/1099 - 2s - loss: 941.1826 - mse: 941.1826 - mae: 24.5191 - val\_loss:  
877.2415 - val\_mse: 877.2415 - val\_mae: 23.1184 - 2s/epoch - 2ms/step  
Epoch 81/100  
1099/1099 - 2s - loss: 940.7935 - mse: 940.7935 - mae: 24.5013 - val\_loss:  
876.9792 - val\_mse: 876.9792 - val\_mae: 23.0946 - 2s/epoch - 2ms/step

Epoch 82/100

1099/1099 - 2s - loss: 943.4091 - mse: 943.4091 - mae: 24.5510 - val\_loss: 877.1227 - val\_mse: 877.1227 - val\_mae: 23.0840 - 2s/epoch - 2ms/step

Epoch 83/100

1099/1099 - 2s - loss: 943.4232 - mse: 943.4232 - mae: 24.5506 - val\_loss: 875.5141 - val\_mse: 875.5141 - val\_mae: 23.0515 - 2s/epoch - 2ms/step

Epoch 84/100

1099/1099 - 2s - loss: 942.4769 - mse: 942.4769 - mae: 24.5253 - val\_loss: 875.8915 - val\_mse: 875.8915 - val\_mae: 23.0716 - 2s/epoch - 2ms/step

Epoch 85/100

1099/1099 - 2s - loss: 941.9694 - mse: 941.9694 - mae: 24.5418 - val\_loss: 877.7257 - val\_mse: 877.7257 - val\_mae: 23.0860 - 2s/epoch - 2ms/step

Epoch 86/100

1099/1099 - 2s - loss: 943.0664 - mse: 943.0664 - mae: 24.5434 - val\_loss: 875.6288 - val\_mse: 875.6288 - val\_mae: 23.0809 - 2s/epoch - 2ms/step

Epoch 87/100

1099/1099 - 2s - loss: 941.6983 - mse: 941.6983 - mae: 24.5114 - val\_loss: 878.7219 - val\_mse: 878.7219 - val\_mae: 23.1577 - 2s/epoch - 2ms/step

Epoch 88/100

1099/1099 - 2s - loss: 942.2097 - mse: 942.2097 - mae: 24.5384 - val\_loss: 875.9622 - val\_mse: 875.9622 - val\_mae: 23.0805 - 2s/epoch - 2ms/step

Epoch 89/100

1099/1099 - 2s - loss: 939.5485 - mse: 939.5485 - mae: 24.4854 - val\_loss: 874.3881 - val\_mse: 874.3881 - val\_mae: 23.0132 - 2s/epoch - 2ms/step

Epoch 90/100

1099/1099 - 2s - loss: 940.7151 - mse: 940.7151 - mae: 24.5221 - val\_loss: 873.6753 - val\_mse: 873.6753 - val\_mae: 23.0367 - 2s/epoch - 2ms/step

Epoch 91/100

1099/1099 - 2s - loss: 941.7370 - mse: 941.7370 - mae: 24.5219 - val\_loss: 879.1335 - val\_mse: 879.1335 - val\_mae: 23.1962 - 2s/epoch - 2ms/step

Epoch 92/100

1099/1099 - 2s - loss: 939.4038 - mse: 939.4038 - mae: 24.5107 - val\_loss: 874.9245 - val\_mse: 874.9245 - val\_mae: 23.0703 - 2s/epoch - 2ms/step

Epoch 93/100

1099/1099 - 2s - loss: 941.5411 - mse: 941.5411 - mae: 24.5208 - val\_loss: 877.8152 - val\_mse: 877.8152 - val\_mae: 23.1063 - 2s/epoch - 2ms/step

Epoch 94/100

1099/1099 - 2s - loss: 941.8752 - mse: 941.8752 - mae: 24.5290 - val\_loss: 872.8925 - val\_mse: 872.8925 - val\_mae: 22.9749 - 2s/epoch - 2ms/step

Epoch 95/100

1099/1099 - 2s - loss: 939.4891 - mse: 939.4891 - mae: 24.4901 - val\_loss: 873.4078 - val\_mse: 873.4078 - val\_mae: 23.0350 - 2s/epoch - 2ms/step

Epoch 96/100

1099/1099 - 2s - loss: 940.4275 - mse: 940.4275 - mae: 24.4988 - val\_loss: 877.2036 - val\_mse: 877.2036 - val\_mae: 23.1426 - 2s/epoch - 2ms/step

Epoch 97/100

1099/1099 - 2s - loss: 939.2797 - mse: 939.2797 - mae: 24.4690 - val\_loss: 875.8850 - val\_mse: 875.8850 - val\_mae: 23.0995 - 2s/epoch - 2ms/step

Epoch 98/100

1099/1099 - 2s - loss: 941.7657 - mse: 941.7657 - mae: 24.5137 - val\_loss: 876.6512 - val\_mse: 876.6512 - val\_mae: 23.1333 - 2s/epoch - 2ms/step

Epoch 99/100

1099/1099 - 2s - loss: 938.3690 - mse: 938.3690 - mae: 24.4617 - val\_loss: 879.0812 - val\_mse: 879.0812 - val\_mae: 23.1354 - 2s/epoch - 2ms/step

Epoch 100/100

1099/1099 - 2s - loss: 938.7350 - mse: 938.7350 - mae: 24.4584 - val\_loss: 877.1339 - val\_mse: 877.1339 - val\_mae: 23.1341 - 2s/epoch - 2ms/step

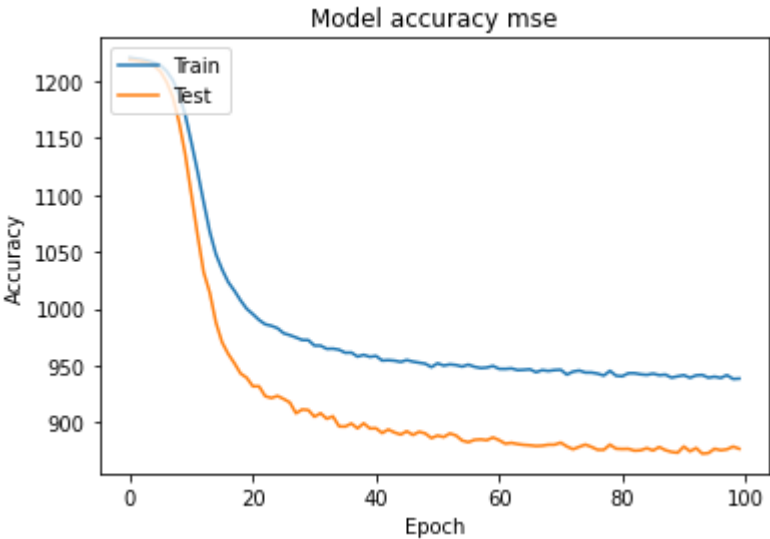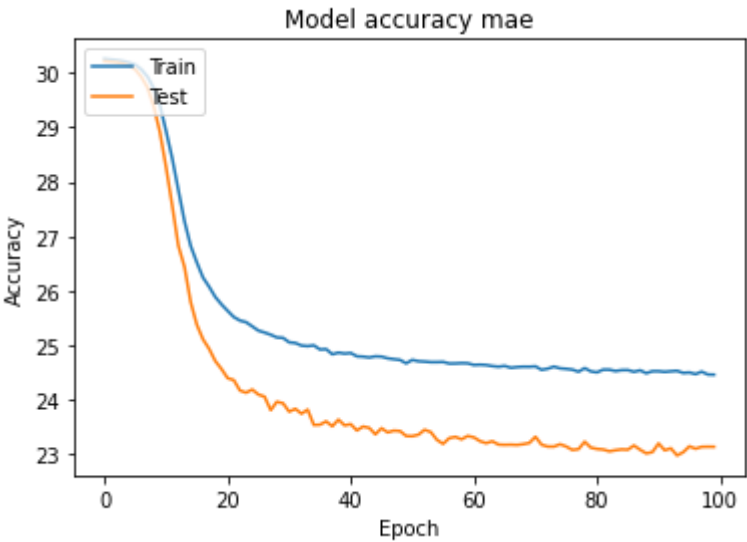

In [ ]:

```
print("Individual phase 1D CNN")

shape=(40,1)
filters=(8,8)
layers=(10,)
epochs = 25
model = create_1d_cnn(shape, True, filters, layers, 'relu')
model.compile(loss='mean_squared_error', optimizer=opt, metrics=['mse','mae'])

history = model.fit(
    x= x_train_phase, y=y_train,
    validation_data=(x_test_phase, y_test),
    epochs=epochs, batch_size=64, verbose=2
)

display_graphs(history)
```

## Individual phase 1D CNN

Epoch 1/25

1099/1099 - 4s - loss: 1216.2977 - mse: 1216.2977 - mae: 30.1952 - val\_loss: 1206.2151 - val\_mse: 1206.2151 - val\_mae: 30.0357 - 4s/epoch - 4ms/step

Epoch 2/25

1099/1099 - 4s - loss: 1195.4308 - mse: 1195.4308 - mae: 29.8417 - val\_loss: 1179.8248 - val\_mse: 1179.8248 - val\_mae: 29.6378 - 4s/epoch - 3ms/step

Epoch 3/25

1099/1099 - 4s - loss: 1175.6683 - mse: 1175.6683 - mae: 29.4775 - val\_loss: 1160.3367 - val\_mse: 1160.3367 - val\_mae: 29.3408 - 4s/epoch - 3ms/step

Epoch 4/25

1099/1099 - 4s - loss: 1158.2605 - mse: 1158.2605 - mae: 29.1569 - val\_loss: 1140.7474 - val\_mse: 1140.7474 - val\_mae: 29.0244 - 4s/epoch - 3ms/step

Epoch 5/25

1099/1099 - 4s - loss: 1140.7532 - mse: 1140.7532 - mae: 28.8310 - val\_loss: 1119.7234 - val\_mse: 1119.7234 - val\_mae: 28.6858 - 4s/epoch - 3ms/step

Epoch 6/25

1099/1099 - 4s - loss: 1128.0399 - mse: 1128.0399 - mae: 28.5702 - val\_loss: 1100.9545 - val\_mse: 1100.9545 - val\_mae: 28.3654 - 4s/epoch - 3ms/step

Epoch 7/25

1099/1099 - 4s - loss: 1119.0387 - mse: 1119.0387 - mae: 28.3869 - val\_loss: 1089.7173 - val\_mse: 1089.7173 - val\_mae: 28.1668 - 4s/epoch - 3ms/step

Epoch 8/25

1099/1099 - 4s - loss: 1111.0245 - mse: 1111.0245 - mae: 28.2309 - val\_loss: 1076.2145 - val\_mse: 1076.2145 - val\_mae: 27.9422 - 4s/epoch - 3ms/step

Epoch 9/25

1099/1099 - 4s - loss: 1103.7123 - mse: 1103.7123 - mae: 28.0824 - val\_loss: 1067.7040 - val\_mse: 1067.7040 - val\_mae: 27.7685 - 4s/epoch - 3ms/step

Epoch 10/25

1099/1099 - 4s - loss: 1097.7877 - mse: 1097.7877 - mae: 27.9700 - val\_loss: 1063.9521 - val\_mse: 1063.9521 - val\_mae: 27.7054 - 4s/epoch - 3ms/step

Epoch 11/25

1099/1099 - 4s - loss: 1093.1858 - mse: 1093.1858 - mae: 27.8788 - val\_loss: 1054.5491 - val\_mse: 1054.5491 - val\_mae: 27.5408 - 4s/epoch - 3ms/step

Epoch 12/25

1099/1099 - 4s - loss: 1088.0768 - mse: 1088.0768 - mae: 27.7827 - val\_loss: 1048.9882 - val\_mse: 1048.9882 - val\_mae: 27.4138 - 4s/epoch - 3ms/step

Epoch 13/25

1099/1099 - 4s - loss: 1084.5558 - mse: 1084.5558 - mae: 27.7066 - val\_loss: 1047.9973 - val\_mse: 1047.9973 - val\_mae: 27.3853 - 4s/epoch - 3ms/step

Epoch 14/25

1099/1099 - 4s - loss: 1078.5624 - mse: 1078.5624 - mae: 27.5979 - val\_loss: 1045.1881 - val\_mse: 1045.1881 - val\_mae: 27.3135 - 4s/epoch - 3ms/step

Epoch 15/25

1099/1099 - 3s - loss: 1074.0557 - mse: 1074.0557 - mae: 27.4944 - val\_loss: 1034.2518 - val\_mse: 1034.2518 - val\_mae: 27.1242 - 3s/epoch - 3ms/step

Epoch 16/25

1099/1099 - 4s - loss: 1068.6398 - mse: 1068.6398 - mae: 27.3880 - val\_loss: 1030.0646 - val\_mse: 1030.0646 - val\_mae: 27.0366 - 4s/epoch - 3ms/step

Epoch 17/25

1099/1099 - 4s - loss: 1067.2417 - mse: 1067.2417 - mae: 27.3484 - val\_loss: 1020.5089 - val\_mse: 1020.5089 - val\_mae: 26.8578 - 4s/epoch - 3ms/step

Epoch 18/25

1099/1099 - 4s - loss: 1062.6487 - mse: 1062.6487 - mae: 27.2556 - val\_loss: 1020.8123 - val\_mse: 1020.8123 - val\_mae: 26.8413 - 4s/epoch - 3ms/step

Epoch 19/25

1099/1099 - 4s - loss: 1058.0948 - mse: 1058.0948 - mae: 27.1657 - val\_loss: 1033.8792 - val\_mse: 1033.8792 - val\_mae: 27.0302 - 4s/epoch - 3ms/step

Epoch 20/25

1099/1099 - 4s - loss: 1055.1331 - mse: 1055.1331 - mae: 27.1073 - val\_loss: 1016.1931 - val\_mse: 1016.1931 - val\_mae: 26.7217 - 4s/epoch - 4ms/step

Epoch 21/25

1099/1099 - 4s - loss: 1051.9086 - mse: 1051.9086 - mae: 27.0402 - val\_loss: 1002.9152 - val\_mse: 1002.9152 - val\_mae: 26.4843 - 4s/epoch - 3ms/step

Epoch 22/25

1099/1099 - 4s - loss: 1049.3337 - mse: 1049.3337 - mae: 26.9942 - val\_loss: 999.9301 - val\_mse: 999.9301 - val\_mae: 26.4343 - 4s/epoch - 4ms/step

Epoch 23/25

1099/1099 - 4s - loss: 1047.8474 - mse: 1047.8474 - mae: 26.9435 - val\_loss: 996.9659 - val\_mse: 996.9659 - val\_mae: 26.3472 - 4s/epoch - 3ms/step

Epoch 24/25

1099/1099 - 4s - loss: 1043.6991 - mse: 1043.6991 - mae: 26.8629 - val\_loss: 998.9954 - val\_mse: 998.9954 - val\_mae: 26.3775 - 4s/epoch - 3ms/step

Epoch 25/25

1099/1099 - 4s - loss: 1041.8630 - mse: 1041.8630 - mae: 26.8163 - val\_loss: 993.3495 - val\_mse: 993.3495 - val\_mae: 26.2762 - 4s/epoch - 4ms/step

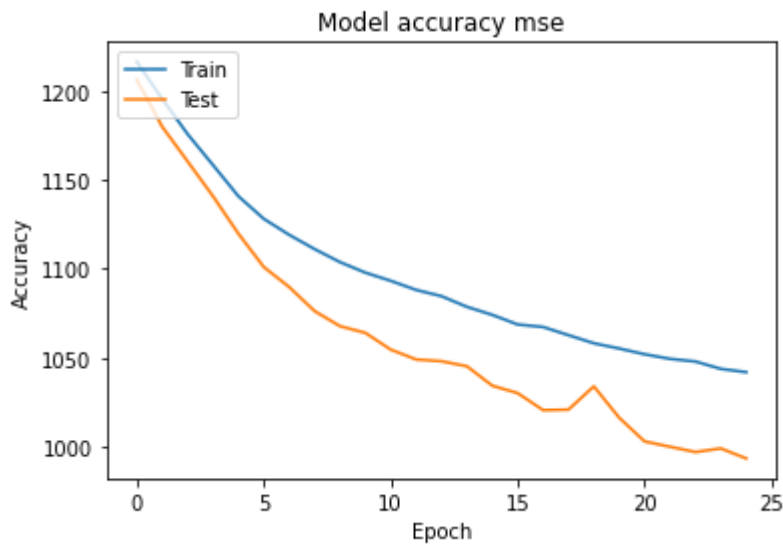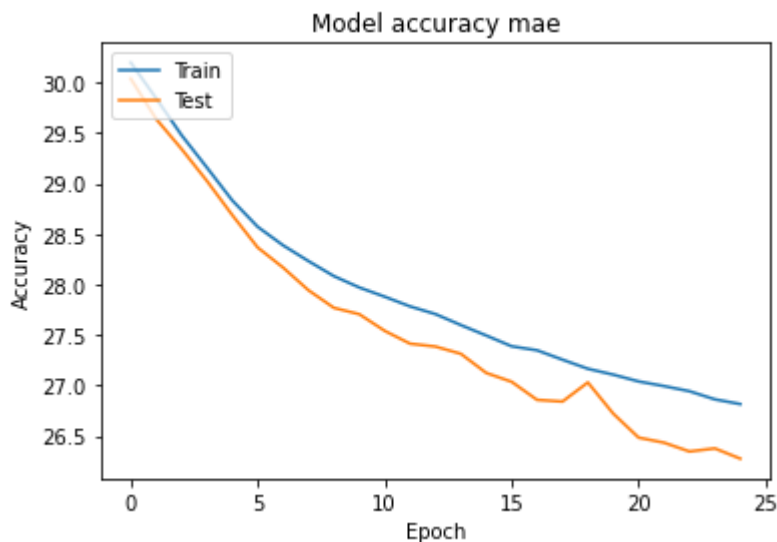

In [ ]:

```
print("Individual magnitude 1D CNN")

shape=(40,1)
filters=(8,8)
layers=(10,)
epochs = 25
model = create_1d_cnn(shape, True, filters, layers, 'relu')
model.compile(loss='mean_squared_error', optimizer=opt, metrics=['mse','mae'])

history = model.fit(
    x= x_train_magnitude, y=y_train,
    validation_data=(x_test_magnitude, y_test),
    epochs=epochs, batch_size=64, verbose=2
)

display_graphs(history)
```

## Individual magnitude 1D CNN

Epoch 1/25

1099/1099 - 4s - loss: 1210.7852 - mse: 1210.7852 - mae: 30.1071 - val\_loss: 1186.9510 - val\_mse: 1186.9510 - val\_mae: 29.7400 - 4s/epoch - 4ms/step

Epoch 2/25

1099/1099 - 4s - loss: 1166.4862 - mse: 1166.4862 - mae: 29.3029 - val\_loss: 1138.8655 - val\_mse: 1138.8655 - val\_mae: 28.9471 - 4s/epoch - 3ms/step

Epoch 3/25

1099/1099 - 4s - loss: 1135.9924 - mse: 1135.9924 - mae: 28.6577 - val\_loss: 1110.5892 - val\_mse: 1110.5892 - val\_mae: 28.4203 - 4s/epoch - 3ms/step

Epoch 4/25

1099/1099 - 4s - loss: 1112.9933 - mse: 1112.9933 - mae: 28.1892 - val\_loss: 1084.3248 - val\_mse: 1084.3248 - val\_mae: 27.9004 - 4s/epoch - 3ms/step

Epoch 5/25

1099/1099 - 4s - loss: 1098.9187 - mse: 1098.9187 - mae: 27.8932 - val\_loss: 1072.3401 - val\_mse: 1072.3401 - val\_mae: 27.6830 - 4s/epoch - 3ms/step

Epoch 6/25

1099/1099 - 4s - loss: 1084.9713 - mse: 1084.9713 - mae: 27.6437 - val\_loss: 1054.3083 - val\_mse: 1054.3083 - val\_mae: 27.3105 - 4s/epoch - 3ms/step

Epoch 7/25

1099/1099 - 4s - loss: 1075.4646 - mse: 1075.4646 - mae: 27.4469 - val\_loss: 1044.3292 - val\_mse: 1044.3292 - val\_mae: 27.1176 - 4s/epoch - 3ms/step

Epoch 8/25

1099/1099 - 4s - loss: 1064.3057 - mse: 1064.3057 - mae: 27.2430 - val\_loss: 1034.9330 - val\_mse: 1034.9330 - val\_mae: 26.9303 - 4s/epoch - 3ms/step

Epoch 9/25

1099/1099 - 4s - loss: 1059.8121 - mse: 1059.8121 - mae: 27.1309 - val\_loss: 1028.7366 - val\_mse: 1028.7366 - val\_mae: 26.8135 - 4s/epoch - 3ms/step

Epoch 10/25

1099/1099 - 4s - loss: 1051.7070 - mse: 1051.7070 - mae: 26.9629 - val\_loss: 1023.9185 - val\_mse: 1023.9185 - val\_mae: 26.7106 - 4s/epoch - 4ms/step

Epoch 11/25

1099/1099 - 4s - loss: 1047.8878 - mse: 1047.8878 - mae: 26.8787 - val\_loss: 1015.1675 - val\_mse: 1015.1675 - val\_mae: 26.5345 - 4s/epoch - 3ms/step

Epoch 12/25

1099/1099 - 4s - loss: 1042.8966 - mse: 1042.8966 - mae: 26.7659 - val\_loss: 1010.2661 - val\_mse: 1010.2661 - val\_mae: 26.4071 - 4s/epoch - 3ms/step

Epoch 13/25

1099/1099 - 4s - loss: 1040.6500 - mse: 1040.6500 - mae: 26.7304 - val\_loss: 1007.9673 - val\_mse: 1007.9673 - val\_mae: 26.3766 - 4s/epoch - 3ms/step

Epoch 14/25

1099/1099 - 4s - loss: 1036.2032 - mse: 1036.2032 - mae: 26.6237 - val\_loss: 1006.1835 - val\_mse: 1006.1835 - val\_mae: 26.3567 - 4s/epoch - 3ms/step

Epoch 15/25

1099/1099 - 4s - loss: 1033.1619 - mse: 1033.1619 - mae: 26.5636 - val\_loss: 995.7186 - val\_mse: 995.7186 - val\_mae: 26.1314 - 4s/epoch - 3ms/step

Epoch 16/25

1099/1099 - 4s - loss: 1032.3114 - mse: 1032.3114 - mae: 26.5370 - val\_loss: 996.2831 - val\_mse: 996.2831 - val\_mae: 26.1594 - 4s/epoch - 4ms/step

Epoch 17/25

1099/1099 - 3s - loss: 1026.7379 - mse: 1026.7379 - mae: 26.4449 - val\_loss: 989.8954 - val\_mse: 989.8954 - val\_mae: 26.0118 - 3s/epoch - 3ms/step

Epoch 18/25

1099/1099 - 4s - loss: 1024.9189 - mse: 1024.9189 - mae: 26.4031 - val\_loss: 990.7425 - val\_mse: 990.7425 - val\_mae: 26.0179 - 4s/epoch - 3ms/step

Epoch 19/25

1099/1099 - 4s - loss: 1023.7684 - mse: 1023.7684 - mae: 26.3779 - val\_loss: 984.1331 - val\_mse: 984.1331 - val\_mae: 25.8778 - 4s/epoch - 3ms/step

Epoch 20/25

1099/1099 - 4s - loss: 1022.0311 - mse: 1022.0311 - mae: 26.3348 - val\_loss: 981.1514 - val\_mse: 981.1514 - val\_mae: 25.8071 - 4s/epoch - 3ms/step



Epoch 21/25

1099/1099 - 4s - loss: 1020.1183 - mse: 1020.1183 - mae: 26.3000 - val\_loss: 977.3129 - val\_mse: 977.3129 - val\_mae: 25.7120 - 4s/epoch - 3ms/step

Epoch 22/25

1099/1099 - 4s - loss: 1017.6421 - mse: 1017.6421 - mae: 26.2481 - val\_loss: 976.5087 - val\_mse: 976.5087 - val\_mae: 25.7597 - 4s/epoch - 3ms/step

Epoch 23/25

1099/1099 - 4s - loss: 1016.1067 - mse: 1016.1067 - mae: 26.2262 - val\_loss: 973.2524 - val\_mse: 973.2524 - val\_mae: 25.6055 - 4s/epoch - 4ms/step

Epoch 24/25

1099/1099 - 3s - loss: 1016.5273 - mse: 1016.5273 - mae: 26.2300 - val\_loss: 969.2855 - val\_mse: 969.2855 - val\_mae: 25.5477 - 3s/epoch - 3ms/step

Epoch 25/25

1099/1099 - 3s - loss: 1014.7859 - mse: 1014.7859 - mae: 26.1751 - val\_loss: 973.3564 - val\_mse: 973.3564 - val\_mae: 25.6573 - 3s/epoch - 3ms/step

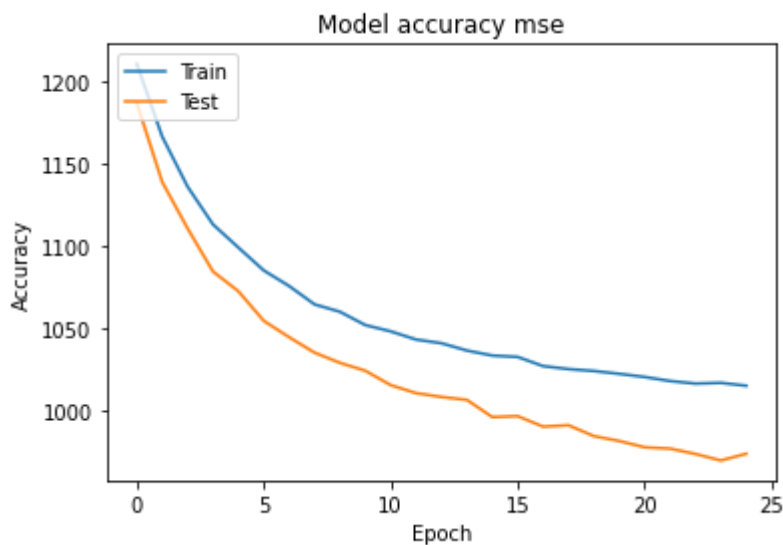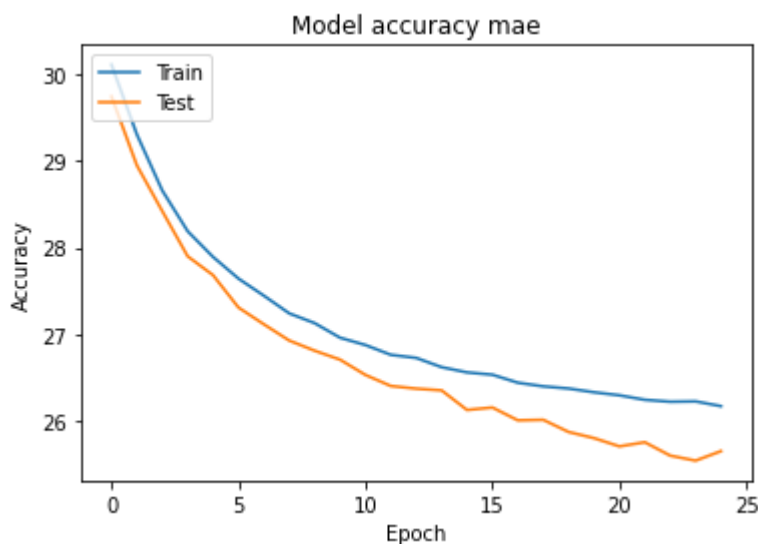

## 8-by-8 antenna array with PCA

In [ ]:

```
antenna_num = 8

magnitude = pd.read_csv('/content/drive/MyDrive/train_magnitude_8.csv', header=None).to_numpy()
output_data = pd.read_csv('/content/drive/MyDrive/train_outputs_8.csv', header=None).to_numpy()
phase = pd.read_csv('/content/drive/MyDrive/train_phase_8.csv', header=None).to_numpy()

data = load_data(phase, magnitude, output_data, antenna_num)

phase_data = data[0]
magnitude_data = data[1]
output_data = data[2]

reduced_data = perform_dimensionality_reduction(phase_data, magnitude_data)
phase_data = reduced_data[0]
magnitude_data = reduced_data[1]

data_split = split_test_train(phase_data, magnitude_data, output_data, 0.4)
x_train_magnitude = data_split[0]
x_test_magnitude = data_split[1]
x_train_phase = data_split[2]
x_test_phase = data_split[3]
y_train = data_split[4][:,0:2]
y_test = data_split[5][:,0:2]

lr = 0.001
epochs = 100
opt = Adam(learning_rate=lr)
```

In [ ]:

```
print("Combined phase and magnitude MLP")

layers = (640,200,10)
shape = (640,)
magnitude = create_mlp(shape, layers, False, "relu")
phase = create_mlp(shape, layers, False, "relu")

model = combine_models(phase, magnitude, (10,))
model.compile(loss='mean_squared_error', optimizer=opt, metrics=['mse', 'mae'])

history = model.fit(
    x=[x_train_magnitude, x_train_phase], y=y_train,
    validation_data=([x_test_magnitude, x_test_phase], y_test),
    epochs=epochs, batch_size=64, verbose=2
)

display_graphs(history)
```

Combined phase and magnitude MLP

Epoch 1/100

1099/1099 - 8s - loss: 1025.8845 - mse: 1025.8845 - mae: 26.3647 - val\_loss: 860.5344 - val\_mse: 860.5344 - val\_mae: 23.0070 - 8s/epoch - 7ms/step

Epoch 2/100

1099/1099 - 8s - loss: 876.2734 - mse: 876.2734 - mae: 23.1473 - val\_loss: 852.1421 - val\_mse: 852.1421 - val\_mae: 22.8335 - 8s/epoch - 7ms/step

Epoch 3/100

1099/1099 - 7s - loss: 846.9422 - mse: 846.9422 - mae: 22.3413 - val\_loss: 843.7009 - val\_mse: 843.7009 - val\_mae: 22.6507 - 7s/epoch - 6ms/step

Epoch 4/100

1099/1099 - 7s - loss: 835.0092 - mse: 835.0092 - mae: 22.0495 - val\_loss: 849.3528 - val\_mse: 849.3528 - val\_mae: 22.9229 - 7s/epoch - 6ms/step

Epoch 5/100

1099/1099 - 7s - loss: 826.4042 - mse: 826.4042 - mae: 21.8098 - val\_loss: 834.4601 - val\_mse: 834.4601 - val\_mae: 22.4222 - 7s/epoch - 6ms/step

Epoch 6/100

1099/1099 - 7s - loss: 821.1435 - mse: 821.1435 - mae: 21.6660 - val\_loss: 829.2800 - val\_mse: 829.2800 - val\_mae: 22.2604 - 7s/epoch - 6ms/step

Epoch 7/100

1099/1099 - 7s - loss: 816.1537 - mse: 816.1537 - mae: 21.5031 - val\_loss: 838.6365 - val\_mse: 838.6365 - val\_mae: 22.6330 - 7s/epoch - 6ms/step

Epoch 8/100

1099/1099 - 7s - loss: 812.0576 - mse: 812.0576 - mae: 21.3973 - val\_loss: 827.7070 - val\_mse: 827.7070 - val\_mae: 22.2604 - 7s/epoch - 6ms/step

Epoch 9/100

1099/1099 - 7s - loss: 808.9550 - mse: 808.9550 - mae: 21.2999 - val\_loss: 831.9583 - val\_mse: 831.9583 - val\_mae: 22.4271 - 7s/epoch - 6ms/step

Epoch 10/100

1099/1099 - 7s - loss: 805.8104 - mse: 805.8104 - mae: 21.1862 - val\_loss: 829.0346 - val\_mse: 829.0346 - val\_mae: 22.3559 - 7s/epoch - 6ms/step

Epoch 11/100

1099/1099 - 7s - loss: 800.9422 - mse: 800.9422 - mae: 21.0747 - val\_loss: 822.9945 - val\_mse: 822.9945 - val\_mae: 22.1550 - 7s/epoch - 6ms/step

Epoch 12/100

1099/1099 - 7s - loss: 797.2952 - mse: 797.2952 - mae: 20.9703 - val\_loss: 833.0017 - val\_mse: 833.0017 - val\_mae: 22.5561 - 7s/epoch - 6ms/step

Epoch 13/100

1099/1099 - 7s - loss: 794.8323 - mse: 794.8323 - mae: 20.8793 - val\_loss: 817.4523 - val\_mse: 817.4523 - val\_mae: 21.9515 - 7s/epoch - 6ms/step

Epoch 14/100

1099/1099 - 8s - loss: 791.3970 - mse: 791.3970 - mae: 20.8151 - val\_loss: 824.9724 - val\_mse: 824.9724 - val\_mae: 22.2820 - 8s/epoch - 7ms/step

Epoch 15/100

1099/1099 - 7s - loss: 789.8209 - mse: 789.8209 - mae: 20.7675 - val\_loss: 818.7377 - val\_mse: 818.7377 - val\_mae: 22.0845 - 7s/epoch - 6ms/step

Epoch 16/100

1099/1099 - 7s - loss: 786.3016 - mse: 786.3016 - mae: 20.6647 - val\_loss: 815.8808 - val\_mse: 815.8808 - val\_mae: 21.9899 - 7s/epoch - 6ms/step

Epoch 17/100

1099/1099 - 7s - loss: 785.7094 - mse: 785.7094 - mae: 20.6233 - val\_loss: 814.8354 - val\_mse: 814.8354 - val\_mae: 21.8395 - 7s/epoch - 6ms/step

Epoch 18/100

1099/1099 - 7s - loss: 785.0958 - mse: 785.0958 - mae: 20.6353 - val\_loss: 818.5073 - val\_mse: 818.5073 - val\_mae: 21.9378 - 7s/epoch - 6ms/step

Epoch 19/100

1099/1099 - 7s - loss: 782.7697 - mse: 782.7697 - mae: 20.5703 - val\_loss: 818.0953 - val\_mse: 818.0953 - val\_mae: 22.1051 - 7s/epoch - 6ms/step

Epoch 20/100

1099/1099 - 7s - loss: 781.5471 - mse: 781.5471 - mae: 20.5462 - val\_loss: 813.0663 - val\_mse: 813.0663 - val\_mae: 21.7856 - 7s/epoch - 6ms/step

Epoch 21/100

1099/1099 - 7s - loss: 779.5115 - mse: 779.5115 - mae: 20.4960 - val\_loss: 810.7053 - val\_mse: 810.7053 - val\_mae: 21.8801 - 7s/epoch - 6ms/step

Epoch 22/100

1099/1099 - 7s - loss: 777.1675 - mse: 777.1675 - mae: 20.4703 - val\_loss: 809.2792 - val\_mse: 809.2792 - val\_mae: 21.6429 - 7s/epoch - 6ms/step

Epoch 23/100

1099/1099 - 7s - loss: 775.6639 - mse: 775.6639 - mae: 20.4203 - val\_loss: 811.5444 - val\_mse: 811.5444 - val\_mae: 21.9053 - 7s/epoch - 6ms/step

Epoch 24/100

1099/1099 - 7s - loss: 773.3489 - mse: 773.3489 - mae: 20.3590 - val\_loss: 803.9655 - val\_mse: 803.9655 - val\_mae: 21.5631 - 7s/epoch - 6ms/step

Epoch 25/100

1099/1099 - 7s - loss: 771.5883 - mse: 771.5883 - mae: 20.3278 - val\_loss: 799.1712 - val\_mse: 799.1712 - val\_mae: 21.4016 - 7s/epoch - 6ms/step

Epoch 26/100

1099/1099 - 7s - loss: 770.9563 - mse: 770.9563 - mae: 20.3062 - val\_loss: 802.9072 - val\_mse: 802.9072 - val\_mae: 21.5045 - 7s/epoch - 6ms/step

Epoch 27/100

1099/1099 - 7s - loss: 769.6609 - mse: 769.6609 - mae: 20.2887 - val\_loss: 816.1434 - val\_mse: 816.1434 - val\_mae: 21.9764 - 7s/epoch - 6ms/step

Epoch 28/100

1099/1099 - 7s - loss: 768.1417 - mse: 768.1417 - mae: 20.2516 - val\_loss: 810.2683 - val\_mse: 810.2683 - val\_mae: 21.8122 - 7s/epoch - 6ms/step

Epoch 29/100

1099/1099 - 7s - loss: 765.9244 - mse: 765.9244 - mae: 20.2090 - val\_loss: 813.8525 - val\_mse: 813.8525 - val\_mae: 21.9424 - 7s/epoch - 6ms/step

Epoch 30/100

1099/1099 - 7s - loss: 764.7441 - mse: 764.7441 - mae: 20.2096 - val\_loss: 809.5757 - val\_mse: 809.5757 - val\_mae: 21.8061 - 7s/epoch - 6ms/step

Epoch 31/100

1099/1099 - 8s - loss: 761.4522 - mse: 761.4522 - mae: 20.1323 - val\_loss: 801.2807 - val\_mse: 801.2807 - val\_mae: 21.5547 - 8s/epoch - 7ms/step

Epoch 32/100

1099/1099 - 7s - loss: 758.6748 - mse: 758.6748 - mae: 20.1156 - val\_loss: 796.3807 - val\_mse: 796.3807 - val\_mae: 21.3459 - 7s/epoch - 6ms/step

Epoch 33/100

1099/1099 - 7s - loss: 760.3474 - mse: 760.3474 - mae: 20.1208 - val\_loss: 800.5594 - val\_mse: 800.5594 - val\_mae: 21.6158 - 7s/epoch - 6ms/step

Epoch 34/100

1099/1099 - 7s - loss: 755.6483 - mse: 755.6483 - mae: 20.0590 - val\_loss: 812.1188 - val\_mse: 812.1188 - val\_mae: 21.9890 - 7s/epoch - 6ms/step

Epoch 35/100

1099/1099 - 7s - loss: 753.1369 - mse: 753.1369 - mae: 20.0372 - val\_loss: 804.3508 - val\_mse: 804.3508 - val\_mae: 21.8064 - 7s/epoch - 6ms/step

Epoch 36/100

1099/1099 - 8s - loss: 750.9350 - mse: 750.9350 - mae: 20.0091 - val\_loss: 797.6609 - val\_mse: 797.6609 - val\_mae: 21.5277 - 8s/epoch - 7ms/step

Epoch 37/100

1099/1099 - 7s - loss: 746.4983 - mse: 746.4983 - mae: 19.9119 - val\_loss: 793.3553 - val\_mse: 793.3553 - val\_mae: 21.4291 - 7s/epoch - 6ms/step

Epoch 38/100

1099/1099 - 9s - loss: 743.8789 - mse: 743.8789 - mae: 19.8145 - val\_loss: 772.0070 - val\_mse: 772.0070 - val\_mae: 20.5377 - 9s/epoch - 8ms/step

Epoch 39/100

1099/1099 - 9s - loss: 738.4293 - mse: 738.4293 - mae: 19.7274 - val\_loss: 790.0647 - val\_mse: 790.0647 - val\_mae: 21.3691 - 9s/epoch - 9ms/step

Epoch 40/100

1099/1099 - 8s - loss: 739.4080 - mse: 739.4080 - mae: 19.7258 - val\_loss: 783.8575 - val\_mse: 783.8575 - val\_mae: 21.2579 - 8s/epoch - 7ms/step

Epoch 41/100

1099/1099 - 7s - loss: 730.7934 - mse: 730.7934 - mae: 19.5820 - val\_loss: 775.6956 - val\_mse: 775.6956 - val\_mae: 20.7860 - 7s/epoch - 6ms/step  
Epoch 42/100  
1099/1099 - 7s - loss: 727.9866 - mse: 727.9866 - mae: 19.4986 - val\_loss: 779.9856 - val\_mse: 779.9856 - val\_mae: 21.0884 - 7s/epoch - 6ms/step  
Epoch 43/100  
1099/1099 - 8s - loss: 721.3734 - mse: 721.3734 - mae: 19.3878 - val\_loss: 767.3196 - val\_mse: 767.3196 - val\_mae: 20.6042 - 8s/epoch - 7ms/step  
Epoch 44/100  
1099/1099 - 7s - loss: 715.1903 - mse: 715.1903 - mae: 19.2783 - val\_loss: 775.8339 - val\_mse: 775.8339 - val\_mae: 21.0571 - 7s/epoch - 6ms/step  
Epoch 45/100  
1099/1099 - 7s - loss: 709.3163 - mse: 709.3163 - mae: 19.1585 - val\_loss: 772.2623 - val\_mse: 772.2623 - val\_mae: 20.9427 - 7s/epoch - 6ms/step  
Epoch 46/100  
1099/1099 - 7s - loss: 707.0966 - mse: 707.0966 - mae: 19.1493 - val\_loss: 766.2667 - val\_mse: 766.2667 - val\_mae: 20.7929 - 7s/epoch - 6ms/step  
Epoch 47/100  
1099/1099 - 8s - loss: 698.6447 - mse: 698.6447 - mae: 18.9832 - val\_loss: 742.4350 - val\_mse: 742.4350 - val\_mae: 19.8385 - 8s/epoch - 7ms/step  
Epoch 48/100  
1099/1099 - 7s - loss: 693.6639 - mse: 693.6639 - mae: 18.8814 - val\_loss: 750.3629 - val\_mse: 750.3629 - val\_mae: 20.3550 - 7s/epoch - 6ms/step  
Epoch 49/100  
1099/1099 - 7s - loss: 693.3871 - mse: 693.3871 - mae: 18.8614 - val\_loss: 742.9944 - val\_mse: 742.9944 - val\_mae: 20.2032 - 7s/epoch - 6ms/step  
Epoch 50/100  
1099/1099 - 7s - loss: 684.1479 - mse: 684.1479 - mae: 18.6613 - val\_loss: 735.1847 - val\_mse: 735.1847 - val\_mae: 19.7983 - 7s/epoch - 6ms/step  
Epoch 51/100  
1099/1099 - 7s - loss: 679.1394 - mse: 679.1394 - mae: 18.5591 - val\_loss: 737.7299 - val\_mse: 737.7299 - val\_mae: 20.1205 - 7s/epoch - 6ms/step  
Epoch 52/100  
1099/1099 - 7s - loss: 665.3412 - mse: 665.3412 - mae: 18.2989 - val\_loss: 731.2357 - val\_mse: 731.2357 - val\_mae: 19.8962 - 7s/epoch - 6ms/step  
Epoch 53/100  
1099/1099 - 7s - loss: 661.4922 - mse: 661.4922 - mae: 18.1774 - val\_loss: 720.5526 - val\_mse: 720.5526 - val\_mae: 19.4875 - 7s/epoch - 6ms/step  
Epoch 54/100  
1099/1099 - 8s - loss: 652.5436 - mse: 652.5436 - mae: 18.0079 - val\_loss: 715.1393 - val\_mse: 715.1393 - val\_mae: 19.3686 - 8s/epoch - 7ms/step  
Epoch 55/100  
1099/1099 - 8s - loss: 646.8547 - mse: 646.8547 - mae: 17.8778 - val\_loss: 710.4789 - val\_mse: 710.4789 - val\_mae: 19.5264 - 8s/epoch - 7ms/step  
Epoch 56/100  
1099/1099 - 7s - loss: 641.8643 - mse: 641.8643 - mae: 17.7833 - val\_loss: 707.0818 - val\_mse: 707.0818 - val\_mae: 19.3535 - 7s/epoch - 6ms/step  
Epoch 57/100  
1099/1099 - 7s - loss: 634.0418 - mse: 634.0418 - mae: 17.6418 - val\_loss: 699.3821 - val\_mse: 699.3821 - val\_mae: 19.1127 - 7s/epoch - 6ms/step  
Epoch 58/100  
1099/1099 - 7s - loss: 629.0936 - mse: 629.0936 - mae: 17.5523 - val\_loss: 698.7074 - val\_mse: 698.7074 - val\_mae: 19.0814 - 7s/epoch - 7ms/step  
Epoch 59/100  
1099/1099 - 7s - loss: 622.4538 - mse: 622.4538 - mae: 17.4499 - val\_loss: 691.8526 - val\_mse: 691.8526 - val\_mae: 19.0826 - 7s/epoch - 7ms/step  
Epoch 60/100  
1099/1099 - 7s - loss: 614.0702 - mse: 614.0702 - mae: 17.2856 - val\_loss: 688.8848 - val\_mse: 688.8848 - val\_mae: 18.7554 - 7s/epoch - 7ms/step  
Epoch 61/100  
1099/1099 - 7s - loss: 607.9694 - mse: 607.9694 - mae: 17.1596 - val\_loss:

681.8370 - val\_mse: 681.8370 - val\_mae: 18.5252 - 7s/epoch - 7ms/step  
Epoch 62/100  
1099/1099 - 8s - loss: 604.3333 - mse: 604.3333 - mae: 17.0881 - val\_loss:  
674.3210 - val\_mse: 674.3210 - val\_mae: 18.3855 - 8s/epoch - 7ms/step  
Epoch 63/100  
1099/1099 - 7s - loss: 599.9025 - mse: 599.9025 - mae: 16.9817 - val\_loss:  
681.8011 - val\_mse: 681.8011 - val\_mae: 18.6426 - 7s/epoch - 6ms/step  
Epoch 64/100  
1099/1099 - 7s - loss: 593.6049 - mse: 593.6049 - mae: 16.8532 - val\_loss:  
676.9088 - val\_mse: 676.9088 - val\_mae: 18.2682 - 7s/epoch - 6ms/step  
Epoch 65/100  
1099/1099 - 7s - loss: 587.5930 - mse: 587.5930 - mae: 16.7037 - val\_loss:  
674.3119 - val\_mse: 674.3119 - val\_mae: 18.4509 - 7s/epoch - 6ms/step  
Epoch 66/100  
1099/1099 - 7s - loss: 579.5403 - mse: 579.5403 - mae: 16.5531 - val\_loss:  
675.2411 - val\_mse: 675.2411 - val\_mae: 18.4297 - 7s/epoch - 6ms/step  
Epoch 67/100  
1099/1099 - 7s - loss: 577.8235 - mse: 577.8235 - mae: 16.5071 - val\_loss:  
658.2297 - val\_mse: 658.2297 - val\_mae: 18.0256 - 7s/epoch - 7ms/step  
Epoch 68/100  
1099/1099 - 8s - loss: 565.4691 - mse: 565.4691 - mae: 16.2761 - val\_loss:  
670.2971 - val\_mse: 670.2971 - val\_mae: 18.0281 - 8s/epoch - 8ms/step  
Epoch 69/100  
1099/1099 - 7s - loss: 559.6612 - mse: 559.6612 - mae: 16.1864 - val\_loss:  
662.2804 - val\_mse: 662.2804 - val\_mae: 17.9449 - 7s/epoch - 6ms/step  
Epoch 70/100  
1099/1099 - 7s - loss: 555.9463 - mse: 555.9463 - mae: 16.0977 - val\_loss:  
655.6631 - val\_mse: 655.6631 - val\_mae: 17.9574 - 7s/epoch - 6ms/step  
Epoch 71/100  
1099/1099 - 7s - loss: 549.6251 - mse: 549.6251 - mae: 15.9824 - val\_loss:  
645.2451 - val\_mse: 645.2451 - val\_mae: 17.7132 - 7s/epoch - 6ms/step  
Epoch 72/100  
1099/1099 - 7s - loss: 540.8966 - mse: 540.8966 - mae: 15.8072 - val\_loss:  
645.5848 - val\_mse: 645.5848 - val\_mae: 17.5527 - 7s/epoch - 6ms/step  
Epoch 73/100  
1099/1099 - 7s - loss: 538.8939 - mse: 538.8939 - mae: 15.7254 - val\_loss:  
644.4399 - val\_mse: 644.4399 - val\_mae: 17.4912 - 7s/epoch - 6ms/step  
Epoch 74/100  
1099/1099 - 7s - loss: 537.7961 - mse: 537.7961 - mae: 15.7179 - val\_loss:  
639.7035 - val\_mse: 639.7035 - val\_mae: 17.3849 - 7s/epoch - 6ms/step  
Epoch 75/100  
1099/1099 - 7s - loss: 527.5705 - mse: 527.5705 - mae: 15.5244 - val\_loss:  
640.3400 - val\_mse: 640.3400 - val\_mae: 17.4052 - 7s/epoch - 6ms/step  
Epoch 76/100  
1099/1099 - 7s - loss: 524.6198 - mse: 524.6198 - mae: 15.4274 - val\_loss:  
636.0308 - val\_mse: 636.0308 - val\_mae: 17.4467 - 7s/epoch - 6ms/step  
Epoch 77/100  
1099/1099 - 7s - loss: 516.3234 - mse: 516.3234 - mae: 15.3235 - val\_loss:  
621.3825 - val\_mse: 621.3825 - val\_mae: 16.8602 - 7s/epoch - 6ms/step  
Epoch 78/100  
1099/1099 - 7s - loss: 516.1130 - mse: 516.1130 - mae: 15.3269 - val\_loss:  
623.4585 - val\_mse: 623.4585 - val\_mae: 16.9583 - 7s/epoch - 6ms/step  
Epoch 79/100  
1099/1099 - 7s - loss: 508.2280 - mse: 508.2280 - mae: 15.1895 - val\_loss:  
622.9363 - val\_mse: 622.9363 - val\_mae: 16.8364 - 7s/epoch - 6ms/step  
Epoch 80/100  
1099/1099 - 7s - loss: 505.7239 - mse: 505.7239 - mae: 15.0829 - val\_loss:  
620.4648 - val\_mse: 620.4648 - val\_mae: 16.5446 - 7s/epoch - 6ms/step  
Epoch 81/100  
1099/1099 - 7s - loss: 505.6805 - mse: 505.6805 - mae: 15.0828 - val\_loss:  
628.0810 - val\_mse: 628.0810 - val\_mae: 16.8947 - 7s/epoch - 6ms/step

Epoch 82/100

1099/1099 - 7s - loss: 493.7125 - mse: 493.7125 - mae: 14.8747 - val\_loss: 617.0193 - val\_mse: 617.0193 - val\_mae: 16.4233 - 7s/epoch - 6ms/step

Epoch 83/100

1099/1099 - 7s - loss: 487.7771 - mse: 487.7771 - mae: 14.7290 - val\_loss: 612.0808 - val\_mse: 612.0808 - val\_mae: 16.6565 - 7s/epoch - 6ms/step

Epoch 84/100

1099/1099 - 8s - loss: 480.7944 - mse: 480.7944 - mae: 14.5593 - val\_loss: 612.4272 - val\_mse: 612.4272 - val\_mae: 16.4068 - 8s/epoch - 7ms/step

Epoch 85/100

1099/1099 - 7s - loss: 477.5635 - mse: 477.5635 - mae: 14.4933 - val\_loss: 599.7974 - val\_mse: 599.7974 - val\_mae: 16.0885 - 7s/epoch - 6ms/step

Epoch 86/100

1099/1099 - 7s - loss: 478.6944 - mse: 478.6944 - mae: 14.4738 - val\_loss: 613.9608 - val\_mse: 613.9608 - val\_mae: 16.3818 - 7s/epoch - 6ms/step

Epoch 87/100

1099/1099 - 7s - loss: 475.4787 - mse: 475.4787 - mae: 14.3997 - val\_loss: 605.7756 - val\_mse: 605.7756 - val\_mae: 16.2429 - 7s/epoch - 6ms/step

Epoch 88/100

1099/1099 - 7s - loss: 467.0253 - mse: 467.0253 - mae: 14.2570 - val\_loss: 596.3347 - val\_mse: 596.3347 - val\_mae: 16.0862 - 7s/epoch - 6ms/step

Epoch 89/100

1099/1099 - 7s - loss: 465.9453 - mse: 465.9453 - mae: 14.2001 - val\_loss: 606.7302 - val\_mse: 606.7302 - val\_mae: 16.3293 - 7s/epoch - 6ms/step

Epoch 90/100

1099/1099 - 8s - loss: 460.3357 - mse: 460.3357 - mae: 14.1082 - val\_loss: 597.4281 - val\_mse: 597.4281 - val\_mae: 16.1328 - 8s/epoch - 8ms/step

Epoch 91/100

1099/1099 - 7s - loss: 461.3975 - mse: 461.3975 - mae: 14.0730 - val\_loss: 602.4291 - val\_mse: 602.4291 - val\_mae: 16.3999 - 7s/epoch - 6ms/step

Epoch 92/100

1099/1099 - 8s - loss: 456.0500 - mse: 456.0500 - mae: 14.0032 - val\_loss: 594.4326 - val\_mse: 594.4326 - val\_mae: 15.9086 - 8s/epoch - 8ms/step

Epoch 93/100

1099/1099 - 7s - loss: 456.7992 - mse: 456.7992 - mae: 14.0348 - val\_loss: 595.3022 - val\_mse: 595.3022 - val\_mae: 15.9599 - 7s/epoch - 7ms/step

Epoch 94/100

1099/1099 - 7s - loss: 445.1946 - mse: 445.1946 - mae: 13.8001 - val\_loss: 588.9848 - val\_mse: 588.9848 - val\_mae: 15.5374 - 7s/epoch - 6ms/step

Epoch 95/100

1099/1099 - 7s - loss: 445.5470 - mse: 445.5470 - mae: 13.7812 - val\_loss: 588.5779 - val\_mse: 588.5779 - val\_mae: 15.6708 - 7s/epoch - 6ms/step

Epoch 96/100

1099/1099 - 7s - loss: 444.6913 - mse: 444.6913 - mae: 13.7648 - val\_loss: 602.9775 - val\_mse: 602.9775 - val\_mae: 16.1747 - 7s/epoch - 6ms/step

Epoch 97/100

1099/1099 - 7s - loss: 439.9096 - mse: 439.9096 - mae: 13.6939 - val\_loss: 579.3364 - val\_mse: 579.3364 - val\_mae: 15.5185 - 7s/epoch - 6ms/step

Epoch 98/100

1099/1099 - 7s - loss: 437.5908 - mse: 437.5908 - mae: 13.5929 - val\_loss: 596.8997 - val\_mse: 596.8997 - val\_mae: 15.7673 - 7s/epoch - 6ms/step

Epoch 99/100

1099/1099 - 7s - loss: 437.3941 - mse: 437.3941 - mae: 13.6288 - val\_loss: 594.4510 - val\_mse: 594.4510 - val\_mae: 15.9597 - 7s/epoch - 6ms/step

Epoch 100/100

1099/1099 - 8s - loss: 441.1494 - mse: 441.1494 - mae: 13.6724 - val\_loss: 586.9399 - val\_mse: 586.9399 - val\_mae: 15.7181 - 8s/epoch - 7ms/step



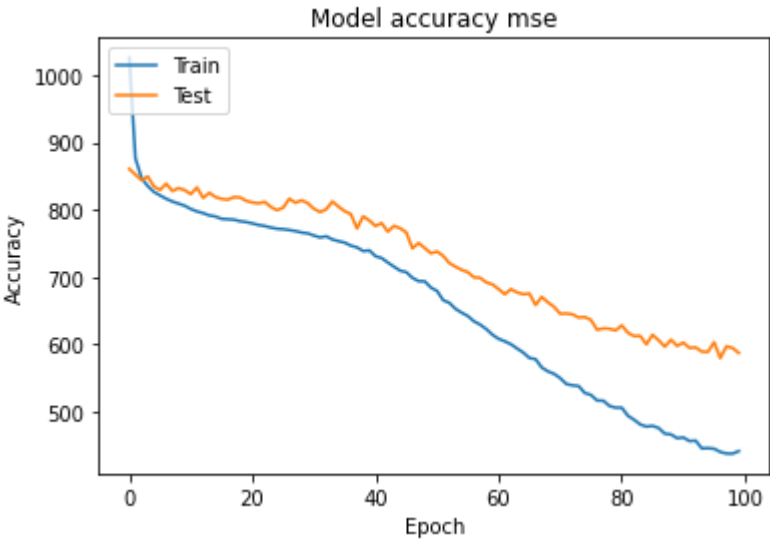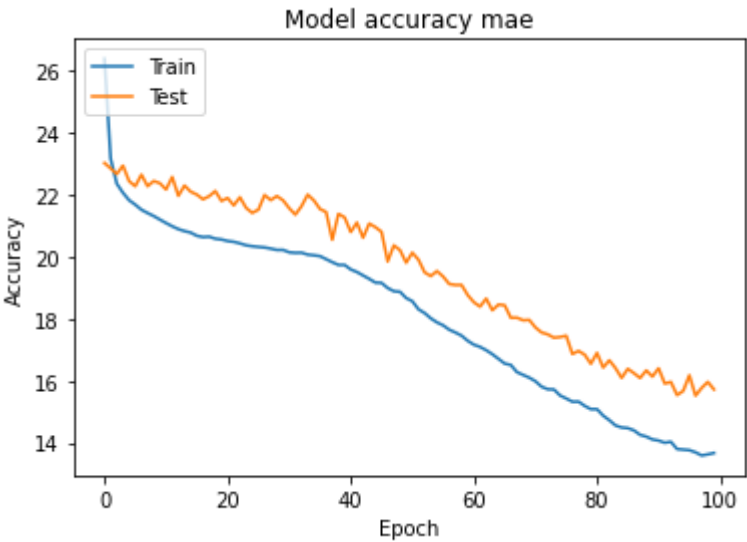

In [ ]:

```
print("Combined phase and magnitude 1D CNN")

shape=(640,1)
filters=(64,64)
layers=(100, )
epochs = 25

phase = create_1d_cnn(shape, False, filters, layers, 'relu')
magnitude = create_1d_cnn(shape, False, filters, layers, 'relu')

model = combine_models(phase, magnitude, (10,))
model.compile(loss='mean_squared_error', optimizer=opt, metrics=['mse', 'mae'])

history = model.fit(
    x=[x_train_magnitude, x_train_phase], y=y_train,
    validation_data=(x_test_magnitude, x_test_phase),
    epochs=epochs, batch_size=64, verbose=2
)

display_graphs(history)
```

Combined phase and magnitude 1D CNN

Epoch 1/25

1099/1099 - 101s - loss: 1140.8313 - mse: 1140.8313 - mae: 28.7379 - val\_loss: 1029.0382 - val\_mse: 1029.0382 - val\_mae: 26.8404 - 101s/epoch - 92ms/step

Epoch 2/25

1099/1099 - 100s - loss: 1040.9501 - mse: 1040.9501 - mae: 26.7759 - val\_loss: 946.0192 - val\_mse: 946.0192 - val\_mae: 25.1969 - 100s/epoch - 91ms/step

Epoch 3/25

1099/1099 - 100s - loss: 951.7106 - mse: 951.7106 - mae: 25.0102 - val\_loss: 874.0647 - val\_mse: 874.0647 - val\_mae: 23.5939 - 100s/epoch - 91ms/step

Epoch 4/25

1099/1099 - 100s - loss: 896.8414 - mse: 896.8414 - mae: 23.8580 - val\_loss: 842.1841 - val\_mse: 842.1841 - val\_mae: 22.8146 - 100s/epoch - 91ms/step

Epoch 5/25

1099/1099 - 99s - loss: 864.7304 - mse: 864.7304 - mae: 23.1422 - val\_loss: 814.4605 - val\_mse: 814.4605 - val\_mae: 22.0407 - 99s/epoch - 90ms/step

Epoch 6/25

1099/1099 - 99s - loss: 841.9850 - mse: 841.9850 - mae: 22.6367 - val\_loss: 802.0651 - val\_mse: 802.0651 - val\_mae: 21.7525 - 99s/epoch - 90ms/step

Epoch 7/25

1099/1099 - 99s - loss: 826.4097 - mse: 826.4097 - mae: 22.2937 - val\_loss: 790.7220 - val\_mse: 790.7220 - val\_mae: 21.3193 - 99s/epoch - 90ms/step

Epoch 8/25

1099/1099 - 99s - loss: 812.1224 - mse: 812.1224 - mae: 21.9984 - val\_loss: 792.5168 - val\_mse: 792.5168 - val\_mae: 21.6252 - 99s/epoch - 90ms/step

Epoch 9/25

1099/1099 - 99s - loss: 799.2000 - mse: 799.2000 - mae: 21.7189 - val\_loss: 776.4348 - val\_mse: 776.4348 - val\_mae: 21.1915 - 99s/epoch - 90ms/step

Epoch 10/25

1099/1099 - 99s - loss: 788.4193 - mse: 788.4193 - mae: 21.5036 - val\_loss: 769.4113 - val\_mse: 769.4113 - val\_mae: 20.9969 - 99s/epoch - 90ms/step

Epoch 11/25

1099/1099 - 103s - loss: 772.0497 - mse: 772.0497 - mae: 21.1913 - val\_loss: 747.4145 - val\_mse: 747.4145 - val\_mae: 20.2334 - 103s/epoch - 94ms/step

p

Epoch 12/25

1099/1099 - 99s - loss: 762.5204 - mse: 762.5204 - mae: 21.0002 - val\_loss: 749.5748 - val\_mse: 749.5748 - val\_mae: 20.6292 - 99s/epoch - 90ms/step

Epoch 13/25

1099/1099 - 99s - loss: 748.0908 - mse: 748.0908 - mae: 20.7188 - val\_loss: 736.5612 - val\_mse: 736.5612 - val\_mae: 20.2216 - 99s/epoch - 90ms/step

Epoch 14/25

1099/1099 - 100s - loss: 736.5002 - mse: 736.5002 - mae: 20.4428 - val\_loss: 725.8771 - val\_mse: 725.8771 - val\_mae: 20.0315 - 100s/epoch - 91ms/step

p

Epoch 15/25

1099/1099 - 99s - loss: 724.8705 - mse: 724.8705 - mae: 20.2323 - val\_loss: 713.2191 - val\_mse: 713.2191 - val\_mae: 19.6466 - 99s/epoch - 90ms/step

Epoch 16/25

1099/1099 - 99s - loss: 713.7825 - mse: 713.7825 - mae: 20.0277 - val\_loss: 706.2437 - val\_mse: 706.2437 - val\_mae: 19.5829 - 99s/epoch - 90ms/step

Epoch 17/25

1099/1099 - 99s - loss: 703.5368 - mse: 703.5368 - mae: 19.8485 - val\_loss: 711.0486 - val\_mse: 711.0486 - val\_mae: 19.7333 - 99s/epoch - 90ms/step

Epoch 18/25

1099/1099 - 100s - loss: 695.2574 - mse: 695.2574 - mae: 19.6429 - val\_loss: 697.5905 - val\_mse: 697.5905 - val\_mae: 19.3943 - 100s/epoch - 91ms/step

p

Epoch 19/25

1099/1099 - 100s - loss: 681.7281 - mse: 681.7281 - mae: 19.3965 - val\_loss: 684.9005 - val\_mse: 684.9005 - val\_mae: 19.2478 - 100s/epoch - 91ms/step

p

Epoch 20/25

1099/1099 - 101s - loss: 667.4342 - mse: 667.4342 - mae: 19.1176 - val\_loss: 671.1520 - val\_mse: 671.1520 - val\_mae: 18.8645 - 101s/epoch - 92ms/step

p

Epoch 21/25

1099/1099 - 99s - loss: 656.0596 - mse: 656.0596 - mae: 18.8956 - val\_loss: 670.5555 - val\_mse: 670.5555 - val\_mae: 18.9461 - 99s/epoch - 90ms/step

Epoch 22/25

1099/1099 - 100s - loss: 646.7770 - mse: 646.7770 - mae: 18.7036 - val\_loss: 661.8258 - val\_mse: 661.8258 - val\_mae: 18.7640 - 100s/epoch - 91ms/step

p

Epoch 23/25

1099/1099 - 101s - loss: 637.2195 - mse: 637.2195 - mae: 18.5072 - val\_loss: 651.2854 - val\_mse: 651.2854 - val\_mae: 18.3906 - 101s/epoch - 91ms/step

p

Epoch 24/25

1099/1099 - 100s - loss: 627.9684 - mse: 627.9684 - mae: 18.3386 - val\_loss: 647.2165 - val\_mse: 647.2165 - val\_mae: 18.3084 - 100s/epoch - 91ms/step

p

Epoch 25/25

1099/1099 - 100s - loss: 618.4814 - mse: 618.4814 - mae: 18.1330 - val\_loss: 644.1506 - val\_mse: 644.1506 - val\_mae: 18.2739 - 100s/epoch - 91ms/step

p

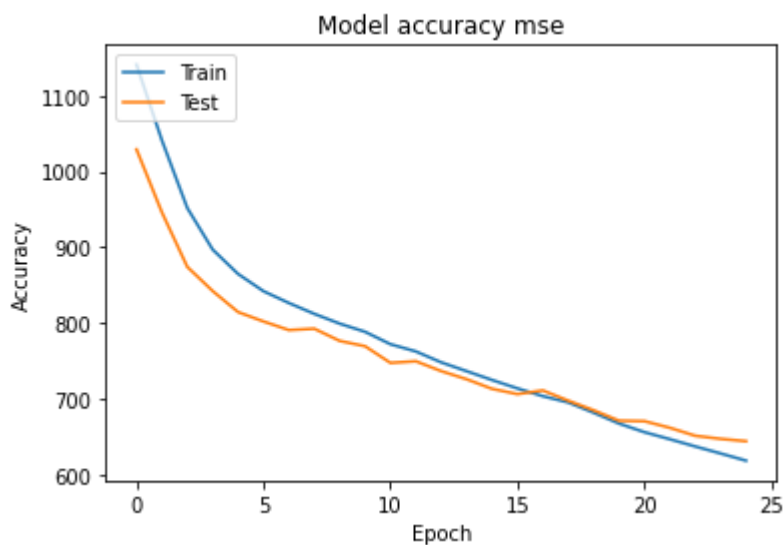

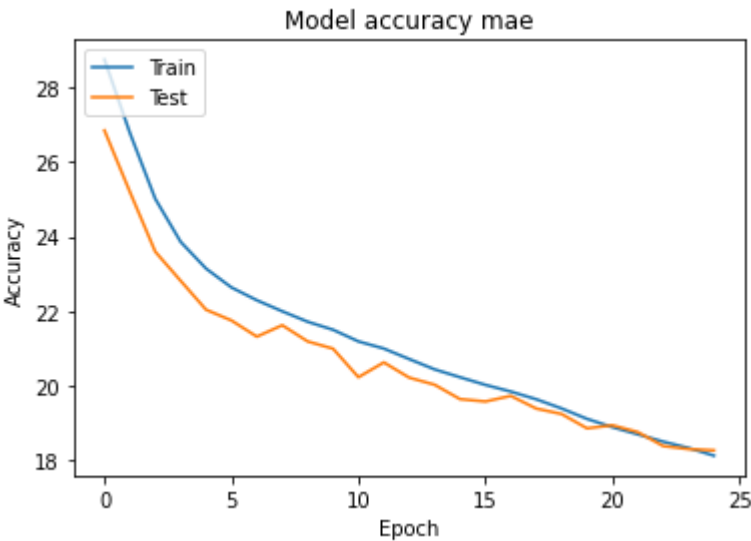

In [ ]:

```
print("Individual phase MLP")

layers = (640,200,10)
shape = (640,)
model = create_mlp(shape, layers, True, "relu")
model.compile(loss='mean_squared_error', optimizer=opt, metrics=['mse', 'mae'])
epochs = 100

history = model.fit(
    x= x_train_phase, y=y_train,
    validation_data=(x_test_phase, y_test),
    epochs=epochs, batch_size=64, verbose=2
)

display_graphs(history)
```

## Individual phase MLP

Epoch 1/100

1099/1099 - 6s - loss: 1220.7804 - mse: 1220.7804 - mae: 30.2662 - val\_loss: 1219.1750 - val\_mse: 1219.1750 - val\_mae: 30.2259 - 6s/epoch - 5ms/step

Epoch 2/100

1099/1099 - 5s - loss: 1220.5554 - mse: 1220.5554 - mae: 30.2629 - val\_loss: 1219.1750 - val\_mse: 1219.1750 - val\_mae: 30.2259 - 5s/epoch - 5ms/step

Epoch 3/100

1099/1099 - 5s - loss: 1220.5768 - mse: 1220.5768 - mae: 30.2630 - val\_loss: 1219.1569 - val\_mse: 1219.1569 - val\_mae: 30.2256 - 5s/epoch - 5ms/step

Epoch 4/100

1099/1099 - 5s - loss: 1135.8419 - mse: 1135.8419 - mae: 28.5509 - val\_loss: 884.9274 - val\_mse: 884.9274 - val\_mae: 23.7844 - 5s/epoch - 5ms/step

Epoch 5/100

1099/1099 - 5s - loss: 956.9708 - mse: 956.9708 - mae: 24.7044 - val\_loss: 852.0176 - val\_mse: 852.0176 - val\_mae: 22.7201 - 5s/epoch - 5ms/step

Epoch 6/100

1099/1099 - 5s - loss: 927.8604 - mse: 927.8604 - mae: 24.0661 - val\_loss: 842.0391 - val\_mse: 842.0391 - val\_mae: 22.5749 - 5s/epoch - 5ms/step

Epoch 7/100

1099/1099 - 5s - loss: 900.5242 - mse: 900.5242 - mae: 23.6530 - val\_loss: 821.3241 - val\_mse: 821.3241 - val\_mae: 21.8421 - 5s/epoch - 5ms/step

Epoch 8/100

1099/1099 - 5s - loss: 886.8402 - mse: 886.8402 - mae: 23.4463 - val\_loss: 823.6099 - val\_mse: 823.6099 - val\_mae: 21.9904 - 5s/epoch - 5ms/step

Epoch 9/100

1099/1099 - 5s - loss: 882.1669 - mse: 882.1669 - mae: 23.3484 - val\_loss: 815.8503 - val\_mse: 815.8503 - val\_mae: 21.6952 - 5s/epoch - 5ms/step

Epoch 10/100

1099/1099 - 5s - loss: 879.0270 - mse: 879.0270 - mae: 23.2725 - val\_loss: 816.4920 - val\_mse: 816.4920 - val\_mae: 21.7678 - 5s/epoch - 5ms/step

Epoch 11/100

1099/1099 - 5s - loss: 878.3541 - mse: 878.3541 - mae: 23.2591 - val\_loss: 807.5890 - val\_mse: 807.5890 - val\_mae: 21.3598 - 5s/epoch - 5ms/step

Epoch 12/100

1099/1099 - 5s - loss: 874.0274 - mse: 874.0274 - mae: 23.1566 - val\_loss: 820.7165 - val\_mse: 820.7165 - val\_mae: 22.0406 - 5s/epoch - 5ms/step

Epoch 13/100

1099/1099 - 5s - loss: 872.4546 - mse: 872.4546 - mae: 23.1306 - val\_loss: 803.1486 - val\_mse: 803.1486 - val\_mae: 21.1797 - 5s/epoch - 5ms/step

Epoch 14/100

1099/1099 - 5s - loss: 870.4610 - mse: 870.4610 - mae: 23.0819 - val\_loss: 810.7018 - val\_mse: 810.7018 - val\_mae: 21.5932 - 5s/epoch - 5ms/step

Epoch 15/100

1099/1099 - 5s - loss: 869.4938 - mse: 869.4938 - mae: 23.0663 - val\_loss: 807.8889 - val\_mse: 807.8889 - val\_mae: 21.5288 - 5s/epoch - 5ms/step

Epoch 16/100

1099/1099 - 5s - loss: 866.0026 - mse: 866.0026 - mae: 22.9905 - val\_loss: 807.7624 - val\_mse: 807.7624 - val\_mae: 21.5468 - 5s/epoch - 5ms/step

Epoch 17/100

1099/1099 - 5s - loss: 864.8858 - mse: 864.8858 - mae: 22.9487 - val\_loss: 809.2556 - val\_mse: 809.2556 - val\_mae: 21.5672 - 5s/epoch - 5ms/step

Epoch 18/100

1099/1099 - 5s - loss: 866.3463 - mse: 866.3463 - mae: 22.9674 - val\_loss: 794.6512 - val\_mse: 794.6512 - val\_mae: 20.8499 - 5s/epoch - 5ms/step

Epoch 19/100

1099/1099 - 5s - loss: 863.2581 - mse: 863.2581 - mae: 22.9083 - val\_loss: 808.6322 - val\_mse: 808.6322 - val\_mae: 21.5732 - 5s/epoch - 5ms/step

Epoch 20/100

1099/1099 - 6s - loss: 860.8761 - mse: 860.8761 - mae: 22.8511 - val\_loss: 802.2999 - val\_mse: 802.2999 - val\_mae: 21.3095 - 6s/epoch - 5ms/step

Epoch 21/100

1099/1099 - 5s - loss: 859.4429 - mse: 859.4429 - mae: 22.8356 - val\_loss: 799.8854 - val\_mse: 799.8854 - val\_mae: 21.2584 - 5s/epoch - 5ms/step

Epoch 22/100

1099/1099 - 5s - loss: 857.9396 - mse: 857.9396 - mae: 22.7988 - val\_loss: 793.8793 - val\_mse: 793.8793 - val\_mae: 20.9540 - 5s/epoch - 5ms/step

Epoch 23/100

1099/1099 - 5s - loss: 857.2796 - mse: 857.2796 - mae: 22.7933 - val\_loss: 798.5159 - val\_mse: 798.5159 - val\_mae: 21.1872 - 5s/epoch - 5ms/step

Epoch 24/100

1099/1099 - 5s - loss: 856.5798 - mse: 856.5798 - mae: 22.7726 - val\_loss: 799.2105 - val\_mse: 799.2105 - val\_mae: 21.2319 - 5s/epoch - 5ms/step

Epoch 25/100

1099/1099 - 5s - loss: 856.6250 - mse: 856.6250 - mae: 22.7826 - val\_loss: 789.3838 - val\_mse: 789.3838 - val\_mae: 20.8428 - 5s/epoch - 5ms/step

Epoch 26/100

1099/1099 - 5s - loss: 856.0882 - mse: 856.0882 - mae: 22.7501 - val\_loss: 788.3663 - val\_mse: 788.3663 - val\_mae: 20.8431 - 5s/epoch - 5ms/step

Epoch 27/100

1099/1099 - 5s - loss: 853.0167 - mse: 853.0167 - mae: 22.7014 - val\_loss: 791.9929 - val\_mse: 791.9929 - val\_mae: 20.8838 - 5s/epoch - 5ms/step

Epoch 28/100

1099/1099 - 5s - loss: 850.5938 - mse: 850.5938 - mae: 22.6742 - val\_loss: 793.0940 - val\_mse: 793.0940 - val\_mae: 21.0624 - 5s/epoch - 5ms/step

Epoch 29/100

1099/1099 - 5s - loss: 852.0378 - mse: 852.0378 - mae: 22.6693 - val\_loss: 792.9065 - val\_mse: 792.9065 - val\_mae: 20.9861 - 5s/epoch - 5ms/step

Epoch 30/100

1099/1099 - 5s - loss: 851.2075 - mse: 851.2075 - mae: 22.6760 - val\_loss: 790.7479 - val\_mse: 790.7479 - val\_mae: 20.9189 - 5s/epoch - 5ms/step

Epoch 31/100

1099/1099 - 5s - loss: 850.1954 - mse: 850.1954 - mae: 22.6553 - val\_loss: 794.7260 - val\_mse: 794.7260 - val\_mae: 21.1272 - 5s/epoch - 5ms/step

Epoch 32/100

1099/1099 - 5s - loss: 847.4686 - mse: 847.4686 - mae: 22.6193 - val\_loss: 785.9088 - val\_mse: 785.9088 - val\_mae: 20.6781 - 5s/epoch - 5ms/step

Epoch 33/100

1099/1099 - 5s - loss: 847.0256 - mse: 847.0256 - mae: 22.5841 - val\_loss: 796.6046 - val\_mse: 796.6046 - val\_mae: 21.2550 - 5s/epoch - 5ms/step

Epoch 34/100

1099/1099 - 5s - loss: 845.9634 - mse: 845.9634 - mae: 22.5704 - val\_loss: 788.6296 - val\_mse: 788.6296 - val\_mae: 20.7392 - 5s/epoch - 5ms/step

Epoch 35/100

1099/1099 - 5s - loss: 846.9263 - mse: 846.9263 - mae: 22.6084 - val\_loss: 786.8594 - val\_mse: 786.8594 - val\_mae: 20.7809 - 5s/epoch - 5ms/step

Epoch 36/100

1099/1099 - 5s - loss: 843.8759 - mse: 843.8759 - mae: 22.5328 - val\_loss: 785.4296 - val\_mse: 785.4296 - val\_mae: 20.7531 - 5s/epoch - 5ms/step

Epoch 37/100

1099/1099 - 5s - loss: 844.3782 - mse: 844.3782 - mae: 22.5569 - val\_loss: 786.6532 - val\_mse: 786.6532 - val\_mae: 20.7867 - 5s/epoch - 5ms/step

Epoch 38/100

1099/1099 - 5s - loss: 842.2573 - mse: 842.2573 - mae: 22.5481 - val\_loss: 785.8930 - val\_mse: 785.8930 - val\_mae: 20.7005 - 5s/epoch - 5ms/step

Epoch 39/100

1099/1099 - 5s - loss: 841.0223 - mse: 841.0223 - mae: 22.5036 - val\_loss: 785.2270 - val\_mse: 785.2270 - val\_mae: 20.7568 - 5s/epoch - 5ms/step

Epoch 40/100

1099/1099 - 5s - loss: 839.7415 - mse: 839.7415 - mae: 22.4802 - val\_loss: 780.6349 - val\_mse: 780.6349 - val\_mae: 20.6000 - 5s/epoch - 5ms/step

Epoch 41/100



1099/1099 - 5s - loss: 837.7990 - mse: 837.7990 - mae: 22.4555 - val\_loss: 782.0506 - val\_mse: 782.0506 - val\_mae: 20.5618 - 5s/epoch - 5ms/step  
Epoch 42/100  
1099/1099 - 5s - loss: 839.1710 - mse: 839.1710 - mae: 22.4608 - val\_loss: 783.9051 - val\_mse: 783.9051 - val\_mae: 20.7357 - 5s/epoch - 5ms/step  
Epoch 43/100  
1099/1099 - 5s - loss: 839.1569 - mse: 839.1569 - mae: 22.4801 - val\_loss: 785.6073 - val\_mse: 785.6073 - val\_mae: 20.7970 - 5s/epoch - 5ms/step  
Epoch 44/100  
1099/1099 - 5s - loss: 837.6735 - mse: 837.6735 - mae: 22.4488 - val\_loss: 781.6941 - val\_mse: 781.6941 - val\_mae: 20.6585 - 5s/epoch - 5ms/step  
Epoch 45/100  
1099/1099 - 5s - loss: 836.3270 - mse: 836.3270 - mae: 22.4388 - val\_loss: 785.6003 - val\_mse: 785.6003 - val\_mae: 20.8543 - 5s/epoch - 5ms/step  
Epoch 46/100  
1099/1099 - 5s - loss: 833.8857 - mse: 833.8857 - mae: 22.3855 - val\_loss: 783.4772 - val\_mse: 783.4772 - val\_mae: 20.6841 - 5s/epoch - 5ms/step  
Epoch 47/100  
1099/1099 - 5s - loss: 833.4081 - mse: 833.4081 - mae: 22.4019 - val\_loss: 777.1863 - val\_mse: 777.1863 - val\_mae: 20.3415 - 5s/epoch - 5ms/step  
Epoch 48/100  
1099/1099 - 5s - loss: 831.5150 - mse: 831.5150 - mae: 22.3701 - val\_loss: 780.5181 - val\_mse: 780.5181 - val\_mae: 20.5654 - 5s/epoch - 5ms/step  
Epoch 49/100  
1099/1099 - 5s - loss: 831.5939 - mse: 831.5939 - mae: 22.3649 - val\_loss: 780.1572 - val\_mse: 780.1572 - val\_mae: 20.5903 - 5s/epoch - 5ms/step  
Epoch 50/100  
1099/1099 - 5s - loss: 831.4705 - mse: 831.4705 - mae: 22.3192 - val\_loss: 778.2678 - val\_mse: 778.2678 - val\_mae: 20.5391 - 5s/epoch - 5ms/step  
Epoch 51/100  
1099/1099 - 5s - loss: 831.9643 - mse: 831.9643 - mae: 22.3660 - val\_loss: 782.8247 - val\_mse: 782.8247 - val\_mae: 20.8061 - 5s/epoch - 5ms/step  
Epoch 52/100  
1099/1099 - 5s - loss: 830.5891 - mse: 830.5891 - mae: 22.3440 - val\_loss: 780.9832 - val\_mse: 780.9832 - val\_mae: 20.6971 - 5s/epoch - 5ms/step  
Epoch 53/100  
1099/1099 - 5s - loss: 828.9745 - mse: 828.9745 - mae: 22.3191 - val\_loss: 777.6215 - val\_mse: 777.6215 - val\_mae: 20.4114 - 5s/epoch - 5ms/step  
Epoch 54/100  
1099/1099 - 5s - loss: 827.5967 - mse: 827.5967 - mae: 22.2769 - val\_loss: 772.5603 - val\_mse: 772.5603 - val\_mae: 20.2266 - 5s/epoch - 5ms/step  
Epoch 55/100  
1099/1099 - 5s - loss: 825.4598 - mse: 825.4598 - mae: 22.2607 - val\_loss: 770.7588 - val\_mse: 770.7588 - val\_mae: 20.1677 - 5s/epoch - 5ms/step  
Epoch 56/100  
1099/1099 - 5s - loss: 826.4714 - mse: 826.4714 - mae: 22.2790 - val\_loss: 774.5474 - val\_mse: 774.5474 - val\_mae: 20.3329 - 5s/epoch - 5ms/step  
Epoch 57/100  
1099/1099 - 5s - loss: 823.4481 - mse: 823.4481 - mae: 22.2202 - val\_loss: 777.5106 - val\_mse: 777.5106 - val\_mae: 20.5660 - 5s/epoch - 5ms/step  
Epoch 58/100  
1099/1099 - 5s - loss: 821.6387 - mse: 821.6387 - mae: 22.1786 - val\_loss: 779.1291 - val\_mse: 779.1291 - val\_mae: 20.4938 - 5s/epoch - 5ms/step  
Epoch 59/100  
1099/1099 - 5s - loss: 823.6133 - mse: 823.6133 - mae: 22.2343 - val\_loss: 779.6213 - val\_mse: 779.6213 - val\_mae: 20.5337 - 5s/epoch - 5ms/step  
Epoch 60/100  
1099/1099 - 5s - loss: 822.3649 - mse: 822.3649 - mae: 22.1970 - val\_loss: 776.4822 - val\_mse: 776.4822 - val\_mae: 20.5203 - 5s/epoch - 5ms/step  
Epoch 61/100  
1099/1099 - 5s - loss: 822.7499 - mse: 822.7499 - mae: 22.2089 - val\_loss:

773.5281 - val\_mse: 773.5281 - val\_mae: 20.1520 - 5s/epoch - 5ms/step  
Epoch 62/100  
1099/1099 - 5s - loss: 820.4150 - mse: 820.4150 - mae: 22.1828 - val\_loss:  
772.2716 - val\_mse: 772.2716 - val\_mae: 20.1413 - 5s/epoch - 5ms/step  
Epoch 63/100  
1099/1099 - 5s - loss: 819.6357 - mse: 819.6357 - mae: 22.1702 - val\_loss:  
778.8867 - val\_mse: 778.8867 - val\_mae: 20.6567 - 5s/epoch - 5ms/step  
Epoch 64/100  
1099/1099 - 5s - loss: 819.9949 - mse: 819.9949 - mae: 22.1569 - val\_loss:  
774.2969 - val\_mse: 774.2969 - val\_mae: 20.3342 - 5s/epoch - 5ms/step  
Epoch 65/100  
1099/1099 - 5s - loss: 815.2855 - mse: 815.2855 - mae: 22.0908 - val\_loss:  
778.5449 - val\_mse: 778.5449 - val\_mae: 20.4114 - 5s/epoch - 5ms/step  
Epoch 66/100  
1099/1099 - 5s - loss: 818.2998 - mse: 818.2998 - mae: 22.1390 - val\_loss:  
776.1032 - val\_mse: 776.1032 - val\_mae: 20.1775 - 5s/epoch - 5ms/step  
Epoch 67/100  
1099/1099 - 5s - loss: 812.8698 - mse: 812.8698 - mae: 22.0474 - val\_loss:  
776.0057 - val\_mse: 776.0057 - val\_mae: 20.4508 - 5s/epoch - 5ms/step  
Epoch 68/100  
1099/1099 - 5s - loss: 815.2606 - mse: 815.2606 - mae: 22.0853 - val\_loss:  
771.1051 - val\_mse: 771.1051 - val\_mae: 20.2274 - 5s/epoch - 5ms/step  
Epoch 69/100  
1099/1099 - 5s - loss: 814.7626 - mse: 814.7626 - mae: 22.0813 - val\_loss:  
780.0782 - val\_mse: 780.0782 - val\_mae: 20.4985 - 5s/epoch - 5ms/step  
Epoch 70/100  
1099/1099 - 5s - loss: 812.7853 - mse: 812.7853 - mae: 22.0271 - val\_loss:  
774.8277 - val\_mse: 774.8277 - val\_mae: 20.4737 - 5s/epoch - 5ms/step  
Epoch 71/100  
1099/1099 - 5s - loss: 813.4115 - mse: 813.4115 - mae: 22.0466 - val\_loss:  
771.2755 - val\_mse: 771.2755 - val\_mae: 20.3005 - 5s/epoch - 5ms/step  
Epoch 72/100  
1099/1099 - 5s - loss: 813.2828 - mse: 813.2828 - mae: 22.0404 - val\_loss:  
780.2922 - val\_mse: 780.2922 - val\_mae: 20.6368 - 5s/epoch - 5ms/step  
Epoch 73/100  
1099/1099 - 5s - loss: 813.0535 - mse: 813.0535 - mae: 22.0122 - val\_loss:  
776.8722 - val\_mse: 776.8722 - val\_mae: 20.5459 - 5s/epoch - 5ms/step  
Epoch 74/100  
1099/1099 - 5s - loss: 809.4827 - mse: 809.4827 - mae: 21.9705 - val\_loss:  
772.9112 - val\_mse: 772.9112 - val\_mae: 20.2453 - 5s/epoch - 5ms/step  
Epoch 75/100  
1099/1099 - 5s - loss: 809.6846 - mse: 809.6846 - mae: 21.9821 - val\_loss:  
768.9003 - val\_mse: 768.9003 - val\_mae: 20.0855 - 5s/epoch - 5ms/step  
Epoch 76/100  
1099/1099 - 5s - loss: 810.8671 - mse: 810.8671 - mae: 22.0016 - val\_loss:  
775.6877 - val\_mse: 775.6877 - val\_mae: 20.4716 - 5s/epoch - 5ms/step  
Epoch 77/100  
1099/1099 - 5s - loss: 808.5057 - mse: 808.5057 - mae: 21.9475 - val\_loss:  
766.6765 - val\_mse: 766.6765 - val\_mae: 19.9913 - 5s/epoch - 5ms/step  
Epoch 78/100  
1099/1099 - 5s - loss: 807.2335 - mse: 807.2335 - mae: 21.9427 - val\_loss:  
774.2081 - val\_mse: 774.2081 - val\_mae: 20.5033 - 5s/epoch - 5ms/step  
Epoch 79/100  
1099/1099 - 5s - loss: 809.0178 - mse: 809.0178 - mae: 21.9694 - val\_loss:  
770.7395 - val\_mse: 770.7395 - val\_mae: 20.1981 - 5s/epoch - 5ms/step  
Epoch 80/100  
1099/1099 - 5s - loss: 807.7751 - mse: 807.7751 - mae: 21.9388 - val\_loss:  
772.1353 - val\_mse: 772.1353 - val\_mae: 20.3547 - 5s/epoch - 5ms/step  
Epoch 81/100  
1099/1099 - 5s - loss: 807.6684 - mse: 807.6684 - mae: 21.9620 - val\_loss:  
781.0735 - val\_mse: 781.0735 - val\_mae: 20.7862 - 5s/epoch - 5ms/step

Epoch 82/100

1099/1099 - 5s - loss: 805.5861 - mse: 805.5861 - mae: 21.9140 - val\_loss: 768.0352 - val\_mse: 768.0352 - val\_mae: 20.0247 - 5s/epoch - 5ms/step

Epoch 83/100

1099/1099 - 5s - loss: 806.6795 - mse: 806.6795 - mae: 21.9410 - val\_loss: 767.5325 - val\_mse: 767.5325 - val\_mae: 20.1535 - 5s/epoch - 5ms/step

Epoch 84/100

1099/1099 - 7s - loss: 805.6031 - mse: 805.6031 - mae: 21.9408 - val\_loss: 777.2476 - val\_mse: 777.2476 - val\_mae: 20.5310 - 7s/epoch - 6ms/step

Epoch 85/100

1099/1099 - 5s - loss: 806.6995 - mse: 806.6995 - mae: 21.9089 - val\_loss: 766.9566 - val\_mse: 766.9566 - val\_mae: 20.0425 - 5s/epoch - 5ms/step

Epoch 86/100

1099/1099 - 5s - loss: 803.3943 - mse: 803.3943 - mae: 21.8779 - val\_loss: 773.6127 - val\_mse: 773.6127 - val\_mae: 20.4312 - 5s/epoch - 5ms/step

Epoch 87/100

1099/1099 - 5s - loss: 801.6089 - mse: 801.6089 - mae: 21.8649 - val\_loss: 768.2010 - val\_mse: 768.2010 - val\_mae: 20.0408 - 5s/epoch - 5ms/step

Epoch 88/100

1099/1099 - 5s - loss: 801.9258 - mse: 801.9258 - mae: 21.8406 - val\_loss: 770.4070 - val\_mse: 770.4070 - val\_mae: 20.3055 - 5s/epoch - 5ms/step

Epoch 89/100

1099/1099 - 5s - loss: 803.2374 - mse: 803.2374 - mae: 21.8641 - val\_loss: 768.3971 - val\_mse: 768.3971 - val\_mae: 20.1146 - 5s/epoch - 5ms/step

Epoch 90/100

1099/1099 - 5s - loss: 802.7388 - mse: 802.7388 - mae: 21.8634 - val\_loss: 768.3560 - val\_mse: 768.3560 - val\_mae: 20.0704 - 5s/epoch - 5ms/step

Epoch 91/100

1099/1099 - 5s - loss: 802.4577 - mse: 802.4577 - mae: 21.8509 - val\_loss: 775.9255 - val\_mse: 775.9255 - val\_mae: 20.3974 - 5s/epoch - 5ms/step

Epoch 92/100

1099/1099 - 5s - loss: 800.1537 - mse: 800.1537 - mae: 21.8196 - val\_loss: 779.7817 - val\_mse: 779.7817 - val\_mae: 20.5087 - 5s/epoch - 5ms/step

Epoch 93/100

1099/1099 - 5s - loss: 795.1120 - mse: 795.1120 - mae: 21.7030 - val\_loss: 767.5934 - val\_mse: 767.5934 - val\_mae: 20.0760 - 5s/epoch - 5ms/step

Epoch 94/100

1099/1099 - 5s - loss: 787.8761 - mse: 787.8761 - mae: 21.5206 - val\_loss: 765.6669 - val\_mse: 765.6669 - val\_mae: 19.7639 - 5s/epoch - 5ms/step

Epoch 95/100

1099/1099 - 5s - loss: 786.9590 - mse: 786.9590 - mae: 21.5071 - val\_loss: 764.9678 - val\_mse: 764.9678 - val\_mae: 19.8851 - 5s/epoch - 5ms/step

Epoch 96/100

1099/1099 - 5s - loss: 785.5941 - mse: 785.5941 - mae: 21.4770 - val\_loss: 769.7947 - val\_mse: 769.7947 - val\_mae: 20.1003 - 5s/epoch - 5ms/step

Epoch 97/100

1099/1099 - 5s - loss: 785.4553 - mse: 785.4553 - mae: 21.4629 - val\_loss: 763.0295 - val\_mse: 763.0295 - val\_mae: 19.6182 - 5s/epoch - 5ms/step

Epoch 98/100

1099/1099 - 5s - loss: 772.7496 - mse: 772.7496 - mae: 21.1741 - val\_loss: 765.6617 - val\_mse: 765.6617 - val\_mae: 19.6940 - 5s/epoch - 5ms/step

Epoch 99/100

1099/1099 - 5s - loss: 771.0470 - mse: 771.0470 - mae: 21.1355 - val\_loss: 757.6784 - val\_mse: 757.6784 - val\_mae: 19.4562 - 5s/epoch - 5ms/step

Epoch 100/100

1099/1099 - 5s - loss: 769.9562 - mse: 769.9562 - mae: 21.1266 - val\_loss: 762.3674 - val\_mse: 762.3674 - val\_mae: 19.7230 - 5s/epoch - 5ms/step

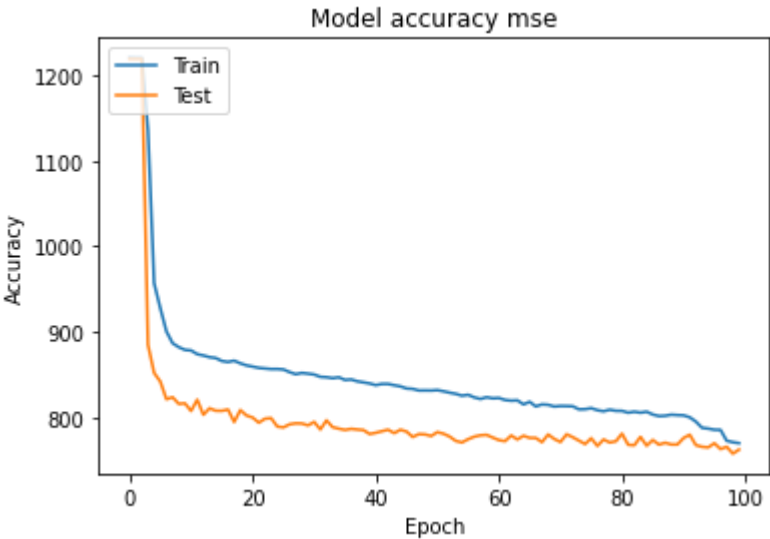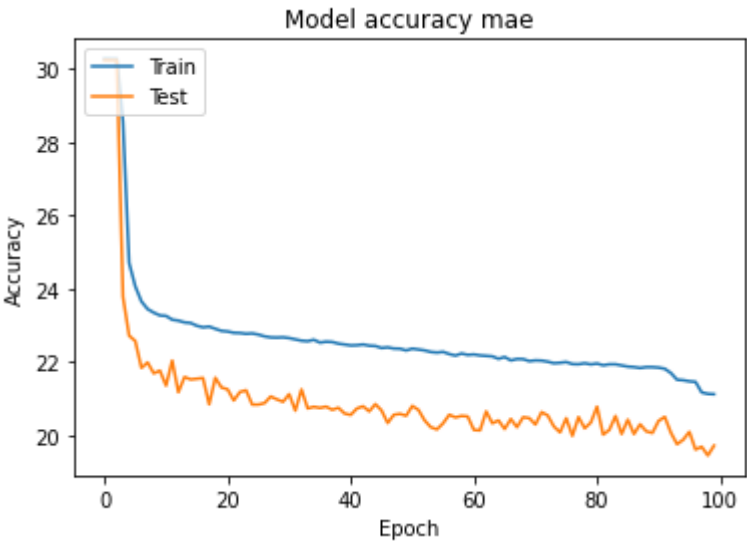

In [ ]:

```
print("Individual magnitude MLP")

layers = (640,200,10)
shape = (640,)
model = create_mlp(shape, layers, True, "relu")
model.compile(loss='mean_squared_error', optimizer=opt, metrics=['mse', 'mae'])

history = model.fit(
    x= x_train_magnitude, y=y_train,
    validation_data=(x_test_magnitude, y_test),
    epochs=epochs, batch_size=64, verbose=2
)

display_graphs(history)
```

## Individual magnitude MLP

Epoch 1/100

1099/1099 - 6s - loss: 1220.7839 - mse: 1220.7839 - mae: 30.2649 - val\_loss: 1219.1744 - val\_mse: 1219.1744 - val\_mae: 30.2258 - 6s/epoch - 6ms/step

Epoch 2/100

1099/1099 - 5s - loss: 1220.5559 - mse: 1220.5559 - mae: 30.2629 - val\_loss: 1219.1754 - val\_mse: 1219.1754 - val\_mae: 30.2258 - 5s/epoch - 4ms/step

Epoch 3/100

1099/1099 - 5s - loss: 1220.5574 - mse: 1220.5574 - mae: 30.2628 - val\_loss: 1219.1744 - val\_mse: 1219.1744 - val\_mae: 30.2258 - 5s/epoch - 5ms/step

Epoch 4/100

1099/1099 - 5s - loss: 1220.5544 - mse: 1220.5544 - mae: 30.2629 - val\_loss: 1219.1750 - val\_mse: 1219.1750 - val\_mae: 30.2258 - 5s/epoch - 5ms/step

Epoch 5/100

1099/1099 - 5s - loss: 1220.5537 - mse: 1220.5537 - mae: 30.2628 - val\_loss: 1219.1752 - val\_mse: 1219.1752 - val\_mae: 30.2258 - 5s/epoch - 5ms/step

Epoch 6/100

1099/1099 - 5s - loss: 1220.6068 - mse: 1220.6068 - mae: 30.2638 - val\_loss: 1219.1748 - val\_mse: 1219.1748 - val\_mae: 30.2258 - 5s/epoch - 5ms/step

Epoch 7/100

1099/1099 - 5s - loss: 1220.7002 - mse: 1220.7002 - mae: 30.2641 - val\_loss: 1219.2277 - val\_mse: 1219.2277 - val\_mae: 30.2265 - 5s/epoch - 5ms/step

Epoch 8/100

1099/1099 - 5s - loss: 1220.5594 - mse: 1220.5594 - mae: 30.2630 - val\_loss: 1219.1746 - val\_mse: 1219.1746 - val\_mae: 30.2258 - 5s/epoch - 5ms/step

Epoch 9/100

1099/1099 - 5s - loss: 1220.5563 - mse: 1220.5563 - mae: 30.2629 - val\_loss: 1219.1747 - val\_mse: 1219.1747 - val\_mae: 30.2258 - 5s/epoch - 5ms/step

Epoch 10/100

1099/1099 - 5s - loss: 1220.5544 - mse: 1220.5544 - mae: 30.2629 - val\_loss: 1219.1746 - val\_mse: 1219.1746 - val\_mae: 30.2258 - 5s/epoch - 4ms/step

Epoch 11/100

1099/1099 - 5s - loss: 1220.5571 - mse: 1220.5571 - mae: 30.2629 - val\_loss: 1219.1750 - val\_mse: 1219.1750 - val\_mae: 30.2259 - 5s/epoch - 5ms/step

Epoch 12/100

1099/1099 - 5s - loss: 1220.5548 - mse: 1220.5548 - mae: 30.2628 - val\_loss: 1219.1746 - val\_mse: 1219.1746 - val\_mae: 30.2259 - 5s/epoch - 5ms/step

Epoch 13/100

1099/1099 - 5s - loss: 1220.5542 - mse: 1220.5542 - mae: 30.2629 - val\_loss: 1219.1741 - val\_mse: 1219.1741 - val\_mae: 30.2259 - 5s/epoch - 5ms/step

Epoch 14/100

1099/1099 - 5s - loss: 1220.5530 - mse: 1220.5530 - mae: 30.2630 - val\_loss: 1219.1742 - val\_mse: 1219.1742 - val\_mae: 30.2258 - 5s/epoch - 5ms/step

Epoch 15/100

1099/1099 - 5s - loss: 1220.5533 - mse: 1220.5533 - mae: 30.2629 - val\_loss: 1219.1754 - val\_mse: 1219.1754 - val\_mae: 30.2258 - 5s/epoch - 5ms/step

Epoch 16/100

1099/1099 - 5s - loss: 1220.5538 - mse: 1220.5538 - mae: 30.2629 - val\_loss: 1219.1748 - val\_mse: 1219.1748 - val\_mae: 30.2259 - 5s/epoch - 5ms/step

Epoch 17/100

1099/1099 - 5s - loss: 1220.5543 - mse: 1220.5543 - mae: 30.2629 - val\_loss: 1219.1748 - val\_mse: 1219.1748 - val\_mae: 30.2259 - 5s/epoch - 5ms/step

Epoch 18/100

1099/1099 - 5s - loss: 1220.5555 - mse: 1220.5555 - mae: 30.2629 - val\_loss: 1219.1753 - val\_mse: 1219.1753 - val\_mae: 30.2259 - 5s/epoch - 4ms/step

Epoch 19/100

1099/1099 - 5s - loss: 1220.6040 - mse: 1220.6040 - mae: 30.2631 - val\_loss: 1219.1750 - val\_mse: 1219.1750 - val\_mae: 30.2259 - 5s/epoch - 5ms/step

Epoch 20/100

1099/1099 - 5s - loss: 1220.5562 - mse: 1220.5562 - mae: 30.2629 - val\_loss: 1219.1748 - val\_mse: 1219.1748 - val\_mae: 30.2259 - 5s/epoch - 5ms/step

Epoch 21/100

1099/1099 - 5s - loss: 1220.5554 - mse: 1220.5554 - mae: 30.2629 - val\_loss: 1219.1752 - val\_mse: 1219.1752 - val\_mae: 30.2259 - 5s/epoch - 5ms/step

Epoch 22/100

1099/1099 - 5s - loss: 1220.5546 - mse: 1220.5546 - mae: 30.2629 - val\_loss: 1219.1743 - val\_mse: 1219.1743 - val\_mae: 30.2258 - 5s/epoch - 5ms/step

Epoch 23/100

1099/1099 - 5s - loss: 1220.5546 - mse: 1220.5546 - mae: 30.2629 - val\_loss: 1219.1746 - val\_mse: 1219.1746 - val\_mae: 30.2259 - 5s/epoch - 5ms/step

Epoch 24/100

1099/1099 - 5s - loss: 1220.5544 - mse: 1220.5544 - mae: 30.2629 - val\_loss: 1219.1747 - val\_mse: 1219.1747 - val\_mae: 30.2259 - 5s/epoch - 5ms/step

Epoch 25/100

1099/1099 - 5s - loss: 1220.5554 - mse: 1220.5554 - mae: 30.2628 - val\_loss: 1219.1742 - val\_mse: 1219.1742 - val\_mae: 30.2258 - 5s/epoch - 5ms/step

Epoch 26/100

1099/1099 - 5s - loss: 1220.6368 - mse: 1220.6368 - mae: 30.2628 - val\_loss: 1219.1752 - val\_mse: 1219.1752 - val\_mae: 30.2259 - 5s/epoch - 5ms/step

Epoch 27/100

1099/1099 - 5s - loss: 1220.5586 - mse: 1220.5586 - mae: 30.2630 - val\_loss: 1219.3418 - val\_mse: 1219.3418 - val\_mae: 30.2274 - 5s/epoch - 5ms/step

Epoch 28/100

1099/1099 - 5s - loss: 1220.5573 - mse: 1220.5573 - mae: 30.2626 - val\_loss: 1219.1754 - val\_mse: 1219.1754 - val\_mae: 30.2259 - 5s/epoch - 4ms/step

Epoch 29/100

1099/1099 - 5s - loss: 1220.5592 - mse: 1220.5592 - mae: 30.2629 - val\_loss: 1219.1747 - val\_mse: 1219.1747 - val\_mae: 30.2258 - 5s/epoch - 5ms/step

Epoch 30/100

1099/1099 - 5s - loss: 1220.5536 - mse: 1220.5536 - mae: 30.2628 - val\_loss: 1219.1754 - val\_mse: 1219.1754 - val\_mae: 30.2258 - 5s/epoch - 5ms/step

Epoch 31/100

1099/1099 - 6s - loss: 1220.5540 - mse: 1220.5540 - mae: 30.2628 - val\_loss: 1219.1749 - val\_mse: 1219.1749 - val\_mae: 30.2258 - 6s/epoch - 6ms/step

Epoch 32/100

1099/1099 - 5s - loss: 1220.5548 - mse: 1220.5548 - mae: 30.2629 - val\_loss: 1219.1749 - val\_mse: 1219.1749 - val\_mae: 30.2258 - 5s/epoch - 5ms/step

Epoch 33/100

1099/1099 - 5s - loss: 1220.5562 - mse: 1220.5562 - mae: 30.2629 - val\_loss: 1219.1744 - val\_mse: 1219.1744 - val\_mae: 30.2258 - 5s/epoch - 4ms/step

Epoch 34/100

1099/1099 - 5s - loss: 1220.5544 - mse: 1220.5544 - mae: 30.2629 - val\_loss: 1219.1746 - val\_mse: 1219.1746 - val\_mae: 30.2258 - 5s/epoch - 4ms/step

Epoch 35/100

1099/1099 - 5s - loss: 1220.5543 - mse: 1220.5543 - mae: 30.2629 - val\_loss: 1219.1749 - val\_mse: 1219.1749 - val\_mae: 30.2258 - 5s/epoch - 5ms/step

Epoch 36/100

1099/1099 - 5s - loss: 1220.5548 - mse: 1220.5548 - mae: 30.2628 - val\_loss: 1219.1754 - val\_mse: 1219.1754 - val\_mae: 30.2258 - 5s/epoch - 5ms/step

Epoch 37/100

1099/1099 - 5s - loss: 1220.5558 - mse: 1220.5558 - mae: 30.2628 - val\_loss: 1219.1749 - val\_mse: 1219.1749 - val\_mae: 30.2258 - 5s/epoch - 5ms/step

Epoch 38/100

1099/1099 - 5s - loss: 1220.5536 - mse: 1220.5536 - mae: 30.2628 - val\_loss: 1219.1746 - val\_mse: 1219.1746 - val\_mae: 30.2258 - 5s/epoch - 5ms/step

Epoch 39/100

1099/1099 - 5s - loss: 1220.6136 - mse: 1220.6136 - mae: 30.2636 - val\_loss: 1219.1750 - val\_mse: 1219.1750 - val\_mae: 30.2258 - 5s/epoch - 5ms/step

Epoch 40/100

1099/1099 - 5s - loss: 1220.5538 - mse: 1220.5538 - mae: 30.2629 - val\_loss: 1219.1749 - val\_mse: 1219.1749 - val\_mae: 30.2258 - 5s/epoch - 5ms/step

Epoch 41/100

1099/1099 - 5s - loss: 1220.6646 - mse: 1220.6646 - mae: 30.2636 - val\_loss: 1219.1748 - val\_mse: 1219.1748 - val\_mae: 30.2258 - 5s/epoch - 5ms/step  
Epoch 42/100  
1099/1099 - 5s - loss: 1220.5562 - mse: 1220.5562 - mae: 30.2628 - val\_loss: 1219.1748 - val\_mse: 1219.1748 - val\_mae: 30.2259 - 5s/epoch - 5ms/step  
Epoch 43/100  
1099/1099 - 5s - loss: 1220.5581 - mse: 1220.5581 - mae: 30.2629 - val\_loss: 1219.1750 - val\_mse: 1219.1750 - val\_mae: 30.2259 - 5s/epoch - 5ms/step  
Epoch 44/100  
1099/1099 - 5s - loss: 1220.5544 - mse: 1220.5544 - mae: 30.2629 - val\_loss: 1219.1746 - val\_mse: 1219.1746 - val\_mae: 30.2259 - 5s/epoch - 5ms/step  
Epoch 45/100  
1099/1099 - 5s - loss: 1220.5524 - mse: 1220.5524 - mae: 30.2628 - val\_loss: 1219.1754 - val\_mse: 1219.1754 - val\_mae: 30.2258 - 5s/epoch - 5ms/step  
Epoch 46/100  
1099/1099 - 5s - loss: 1220.5624 - mse: 1220.5624 - mae: 30.2629 - val\_loss: 1219.1750 - val\_mse: 1219.1750 - val\_mae: 30.2259 - 5s/epoch - 5ms/step  
Epoch 47/100  
1099/1099 - 5s - loss: 1220.5538 - mse: 1220.5538 - mae: 30.2629 - val\_loss: 1219.1749 - val\_mse: 1219.1749 - val\_mae: 30.2259 - 5s/epoch - 5ms/step  
Epoch 48/100  
1099/1099 - 5s - loss: 1220.5552 - mse: 1220.5552 - mae: 30.2629 - val\_loss: 1219.1749 - val\_mse: 1219.1749 - val\_mae: 30.2258 - 5s/epoch - 5ms/step  
Epoch 49/100  
1099/1099 - 5s - loss: 1220.5543 - mse: 1220.5543 - mae: 30.2629 - val\_loss: 1219.1750 - val\_mse: 1219.1750 - val\_mae: 30.2259 - 5s/epoch - 5ms/step  
Epoch 50/100  
1099/1099 - 5s - loss: 1220.5549 - mse: 1220.5549 - mae: 30.2629 - val\_loss: 1219.1750 - val\_mse: 1219.1750 - val\_mae: 30.2258 - 5s/epoch - 5ms/step  
Epoch 51/100  
1099/1099 - 5s - loss: 1220.5549 - mse: 1220.5549 - mae: 30.2629 - val\_loss: 1219.1742 - val\_mse: 1219.1742 - val\_mae: 30.2258 - 5s/epoch - 5ms/step  
Epoch 52/100  
1099/1099 - 5s - loss: 1220.5854 - mse: 1220.5854 - mae: 30.2628 - val\_loss: 1219.1746 - val\_mse: 1219.1746 - val\_mae: 30.2258 - 5s/epoch - 5ms/step  
Epoch 53/100  
1099/1099 - 5s - loss: 1220.5199 - mse: 1220.5199 - mae: 30.2622 - val\_loss: 1219.1746 - val\_mse: 1219.1746 - val\_mae: 30.2258 - 5s/epoch - 5ms/step  
Epoch 54/100  
1099/1099 - 5s - loss: 1220.5732 - mse: 1220.5732 - mae: 30.2629 - val\_loss: 1219.1747 - val\_mse: 1219.1747 - val\_mae: 30.2258 - 5s/epoch - 5ms/step  
Epoch 55/100  
1099/1099 - 5s - loss: 1220.5548 - mse: 1220.5548 - mae: 30.2629 - val\_loss: 1219.1749 - val\_mse: 1219.1749 - val\_mae: 30.2258 - 5s/epoch - 5ms/step  
Epoch 56/100  
1099/1099 - 5s - loss: 1220.5541 - mse: 1220.5541 - mae: 30.2628 - val\_loss: 1219.1753 - val\_mse: 1219.1753 - val\_mae: 30.2258 - 5s/epoch - 5ms/step  
Epoch 57/100  
1099/1099 - 5s - loss: 1220.5817 - mse: 1220.5817 - mae: 30.2631 - val\_loss: 1219.1752 - val\_mse: 1219.1752 - val\_mae: 30.2259 - 5s/epoch - 5ms/step  
Epoch 58/100  
1099/1099 - 5s - loss: 1220.5624 - mse: 1220.5624 - mae: 30.2628 - val\_loss: 1219.1748 - val\_mse: 1219.1748 - val\_mae: 30.2258 - 5s/epoch - 5ms/step  
Epoch 59/100  
1099/1099 - 5s - loss: 1220.5621 - mse: 1220.5621 - mae: 30.2630 - val\_loss: 1219.1749 - val\_mse: 1219.1749 - val\_mae: 30.2258 - 5s/epoch - 5ms/step  
Epoch 60/100  
1099/1099 - 5s - loss: 1220.5540 - mse: 1220.5540 - mae: 30.2629 - val\_loss: 1219.1749 - val\_mse: 1219.1749 - val\_mae: 30.2258 - 5s/epoch - 5ms/step  
Epoch 61/100  
1099/1099 - 5s - loss: 1220.5730 - mse: 1220.5730 - mae: 30.2629 - val\_loss:



s: 1219.1752 - val\_mse: 1219.1752 - val\_mae: 30.2258 - 5s/epoch - 5ms/step  
Epoch 62/100  
1099/1099 - 5s - loss: 1220.5731 - mse: 1220.5731 - mae: 30.2631 - val\_loss: 1219.1747 - val\_mse: 1219.1747 - val\_mae: 30.2258 - 5s/epoch - 5ms/step  
Epoch 63/100  
1099/1099 - 5s - loss: 1220.5590 - mse: 1220.5590 - mae: 30.2629 - val\_loss: 1219.1748 - val\_mse: 1219.1748 - val\_mae: 30.2258 - 5s/epoch - 5ms/step  
Epoch 64/100  
1099/1099 - 5s - loss: 1220.5580 - mse: 1220.5580 - mae: 30.2628 - val\_loss: 1219.1749 - val\_mse: 1219.1749 - val\_mae: 30.2258 - 5s/epoch - 5ms/step  
Epoch 65/100  
1099/1099 - 5s - loss: 1220.5544 - mse: 1220.5544 - mae: 30.2629 - val\_loss: 1219.1748 - val\_mse: 1219.1748 - val\_mae: 30.2258 - 5s/epoch - 5ms/step  
Epoch 66/100  
1099/1099 - 5s - loss: 1220.5544 - mse: 1220.5544 - mae: 30.2629 - val\_loss: 1219.1744 - val\_mse: 1219.1744 - val\_mae: 30.2258 - 5s/epoch - 5ms/step  
Epoch 67/100  
1099/1099 - 5s - loss: 1220.5575 - mse: 1220.5575 - mae: 30.2629 - val\_loss: 1219.1743 - val\_mse: 1219.1743 - val\_mae: 30.2258 - 5s/epoch - 5ms/step  
Epoch 68/100  
1099/1099 - 5s - loss: 1220.5543 - mse: 1220.5543 - mae: 30.2629 - val\_loss: 1219.1743 - val\_mse: 1219.1743 - val\_mae: 30.2258 - 5s/epoch - 5ms/step  
Epoch 69/100  
1099/1099 - 5s - loss: 1220.5541 - mse: 1220.5541 - mae: 30.2629 - val\_loss: 1219.1748 - val\_mse: 1219.1748 - val\_mae: 30.2259 - 5s/epoch - 5ms/step  
Epoch 70/100  
1099/1099 - 5s - loss: 1220.5530 - mse: 1220.5530 - mae: 30.2628 - val\_loss: 1219.1747 - val\_mse: 1219.1747 - val\_mae: 30.2258 - 5s/epoch - 5ms/step  
Epoch 71/100  
1099/1099 - 5s - loss: 1220.5547 - mse: 1220.5547 - mae: 30.2629 - val\_loss: 1219.1749 - val\_mse: 1219.1749 - val\_mae: 30.2259 - 5s/epoch - 5ms/step  
Epoch 72/100  
1099/1099 - 5s - loss: 1220.5537 - mse: 1220.5537 - mae: 30.2628 - val\_loss: 1219.1757 - val\_mse: 1219.1757 - val\_mae: 30.2258 - 5s/epoch - 5ms/step  
Epoch 73/100  
1099/1099 - 5s - loss: 1220.5544 - mse: 1220.5544 - mae: 30.2629 - val\_loss: 1219.1747 - val\_mse: 1219.1747 - val\_mae: 30.2258 - 5s/epoch - 5ms/step  
Epoch 74/100  
1099/1099 - 5s - loss: 1220.5547 - mse: 1220.5547 - mae: 30.2628 - val\_loss: 1219.1752 - val\_mse: 1219.1752 - val\_mae: 30.2258 - 5s/epoch - 5ms/step  
Epoch 75/100  
1099/1099 - 5s - loss: 1220.5544 - mse: 1220.5544 - mae: 30.2629 - val\_loss: 1219.1746 - val\_mse: 1219.1746 - val\_mae: 30.2258 - 5s/epoch - 5ms/step  
Epoch 76/100  
1099/1099 - 5s - loss: 1220.5544 - mse: 1220.5544 - mae: 30.2628 - val\_loss: 1219.1748 - val\_mse: 1219.1748 - val\_mae: 30.2258 - 5s/epoch - 5ms/step  
Epoch 77/100  
1099/1099 - 5s - loss: 1220.5546 - mse: 1220.5546 - mae: 30.2628 - val\_loss: 1219.1748 - val\_mse: 1219.1748 - val\_mae: 30.2259 - 5s/epoch - 5ms/step  
Epoch 78/100  
1099/1099 - 6s - loss: 1220.5544 - mse: 1220.5544 - mae: 30.2629 - val\_loss: 1219.1744 - val\_mse: 1219.1744 - val\_mae: 30.2259 - 6s/epoch - 5ms/step  
Epoch 79/100  
1099/1099 - 5s - loss: 1220.5541 - mse: 1220.5541 - mae: 30.2629 - val\_loss: 1219.1740 - val\_mse: 1219.1740 - val\_mae: 30.2258 - 5s/epoch - 5ms/step  
Epoch 80/100  
1099/1099 - 5s - loss: 1220.5541 - mse: 1220.5541 - mae: 30.2628 - val\_loss: 1219.1748 - val\_mse: 1219.1748 - val\_mae: 30.2258 - 5s/epoch - 4ms/step  
Epoch 81/100  
1099/1099 - 5s - loss: 1220.5544 - mse: 1220.5544 - mae: 30.2629 - val\_loss: 1219.1743 - val\_mse: 1219.1743 - val\_mae: 30.2258 - 5s/epoch - 4ms/step

Epoch 82/100

1099/1099 - 5s - loss: 1220.5543 - mse: 1220.5543 - mae: 30.2628 - val\_loss: 1219.1746 - val\_mse: 1219.1746 - val\_mae: 30.2258 - 5s/epoch - 5ms/step

Epoch 83/100

1099/1099 - 5s - loss: 1220.5552 - mse: 1220.5552 - mae: 30.2628 - val\_loss: 1219.1735 - val\_mse: 1219.1735 - val\_mae: 30.2258 - 5s/epoch - 5ms/step

Epoch 84/100

1099/1099 - 5s - loss: 1220.5538 - mse: 1220.5538 - mae: 30.2628 - val\_loss: 1219.1740 - val\_mse: 1219.1740 - val\_mae: 30.2258 - 5s/epoch - 5ms/step

Epoch 85/100

1099/1099 - 5s - loss: 1220.5541 - mse: 1220.5541 - mae: 30.2628 - val\_loss: 1219.1752 - val\_mse: 1219.1752 - val\_mae: 30.2259 - 5s/epoch - 5ms/step

Epoch 86/100

1099/1099 - 5s - loss: 1220.5551 - mse: 1220.5551 - mae: 30.2629 - val\_loss: 1219.1744 - val\_mse: 1219.1744 - val\_mae: 30.2259 - 5s/epoch - 5ms/step

Epoch 87/100

1099/1099 - 5s - loss: 1220.5546 - mse: 1220.5546 - mae: 30.2629 - val\_loss: 1219.1749 - val\_mse: 1219.1749 - val\_mae: 30.2259 - 5s/epoch - 5ms/step

Epoch 88/100

1099/1099 - 5s - loss: 1220.5542 - mse: 1220.5542 - mae: 30.2630 - val\_loss: 1219.1754 - val\_mse: 1219.1754 - val\_mae: 30.2259 - 5s/epoch - 5ms/step

Epoch 89/100

1099/1099 - 5s - loss: 1220.5553 - mse: 1220.5553 - mae: 30.2629 - val\_loss: 1219.1758 - val\_mse: 1219.1758 - val\_mae: 30.2259 - 5s/epoch - 5ms/step

Epoch 90/100

1099/1099 - 5s - loss: 1220.5552 - mse: 1220.5552 - mae: 30.2629 - val\_loss: 1219.1750 - val\_mse: 1219.1750 - val\_mae: 30.2259 - 5s/epoch - 5ms/step

Epoch 91/100

1099/1099 - 5s - loss: 1220.5531 - mse: 1220.5531 - mae: 30.2629 - val\_loss: 1219.1746 - val\_mse: 1219.1746 - val\_mae: 30.2259 - 5s/epoch - 5ms/step

Epoch 92/100

1099/1099 - 5s - loss: 1220.5536 - mse: 1220.5536 - mae: 30.2628 - val\_loss: 1219.1748 - val\_mse: 1219.1748 - val\_mae: 30.2259 - 5s/epoch - 5ms/step

Epoch 93/100

1099/1099 - 5s - loss: 1220.5541 - mse: 1220.5541 - mae: 30.2629 - val\_loss: 1219.1748 - val\_mse: 1219.1748 - val\_mae: 30.2258 - 5s/epoch - 5ms/step

Epoch 94/100

1099/1099 - 5s - loss: 1220.5544 - mse: 1220.5544 - mae: 30.2628 - val\_loss: 1219.1752 - val\_mse: 1219.1752 - val\_mae: 30.2259 - 5s/epoch - 5ms/step

Epoch 95/100

1099/1099 - 5s - loss: 1220.5538 - mse: 1220.5538 - mae: 30.2628 - val\_loss: 1219.1750 - val\_mse: 1219.1750 - val\_mae: 30.2259 - 5s/epoch - 5ms/step

Epoch 96/100

1099/1099 - 5s - loss: 1220.5536 - mse: 1220.5536 - mae: 30.2629 - val\_loss: 1219.1744 - val\_mse: 1219.1744 - val\_mae: 30.2259 - 5s/epoch - 5ms/step

Epoch 97/100

1099/1099 - 5s - loss: 1220.5542 - mse: 1220.5542 - mae: 30.2628 - val\_loss: 1219.1752 - val\_mse: 1219.1752 - val\_mae: 30.2259 - 5s/epoch - 5ms/step

Epoch 98/100

1099/1099 - 5s - loss: 1220.5546 - mse: 1220.5546 - mae: 30.2629 - val\_loss: 1219.1747 - val\_mse: 1219.1747 - val\_mae: 30.2258 - 5s/epoch - 5ms/step

Epoch 99/100

1099/1099 - 5s - loss: 1220.5543 - mse: 1220.5543 - mae: 30.2628 - val\_loss: 1219.1746 - val\_mse: 1219.1746 - val\_mae: 30.2258 - 5s/epoch - 5ms/step

Epoch 100/100

1099/1099 - 5s - loss: 1220.5543 - mse: 1220.5543 - mae: 30.2628 - val\_loss: 1219.1747 - val\_mse: 1219.1747 - val\_mae: 30.2258 - 5s/epoch - 5ms/step

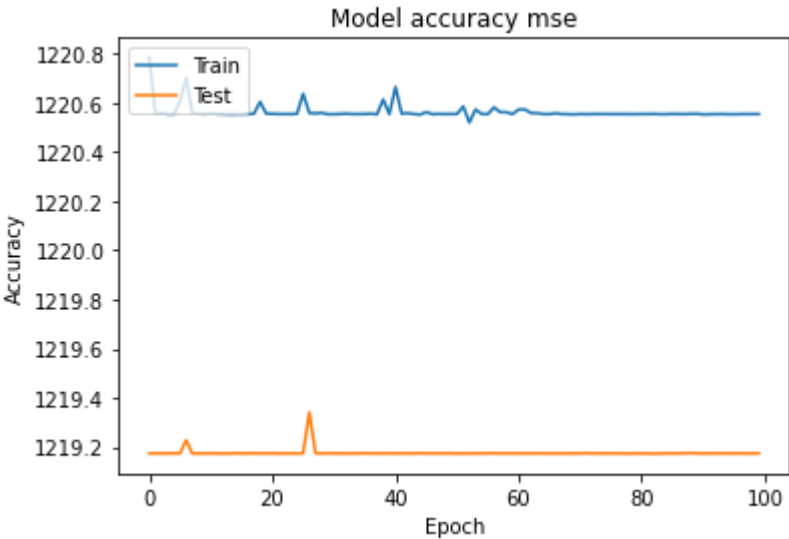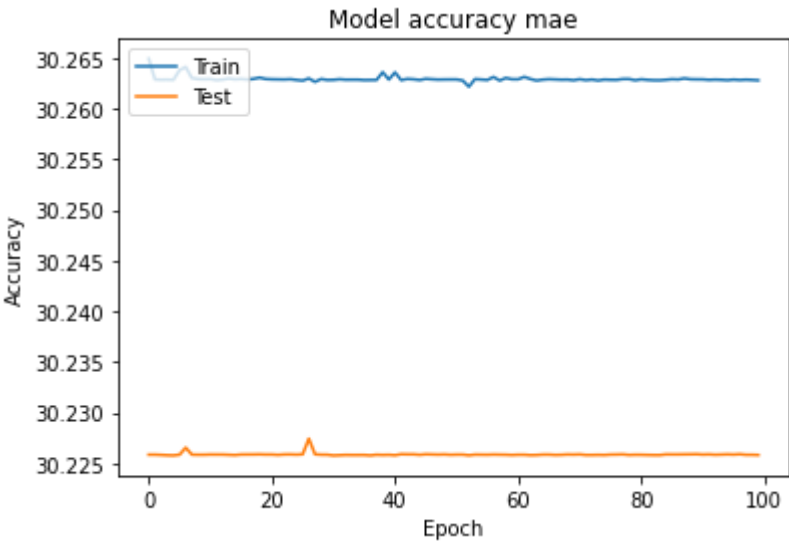

In [ ]:

```
print("Individual phase 1D CNN")

shape=(640,1)
filters=(64,64)
layers=(100,)
epochs = 25
model = create_1d_cnn(shape, True, filters, layers, 'relu')
model.compile(loss='mean_squared_error', optimizer=opt, metrics=['mse','mae'])

history = model.fit(
    x= x_train_phase, y=y_train,
    validation_data=(x_test_phase, y_test),
    epochs=epochs, batch_size=64, verbose=2
)

display_graphs(history)
```

## Individual phase 1D CNN

Epoch 1/25

1099/1099 - 62s - loss: 1094.3363 - mse: 1094.3363 - mae: 27.8587 - val\_loss: 953.8652 - val\_mse: 953.8652 - val\_mae: 25.3143 - 62s/epoch - 57ms/step

Epoch 2/25

1099/1099 - 63s - loss: 977.5836 - mse: 977.5836 - mae: 25.4655 - val\_loss: 910.1144 - val\_mse: 910.1144 - val\_mae: 24.3772 - 63s/epoch - 58ms/step

Epoch 3/25

1099/1099 - 61s - loss: 944.4485 - mse: 944.4485 - mae: 24.7937 - val\_loss: 881.5477 - val\_mse: 881.5477 - val\_mae: 23.6934 - 61s/epoch - 56ms/step

Epoch 4/25

1099/1099 - 61s - loss: 920.5392 - mse: 920.5392 - mae: 24.3208 - val\_loss: 866.0609 - val\_mse: 866.0609 - val\_mae: 23.3612 - 61s/epoch - 56ms/step

Epoch 5/25

1099/1099 - 61s - loss: 896.2507 - mse: 896.2507 - mae: 23.8269 - val\_loss: 845.9401 - val\_mse: 845.9401 - val\_mae: 22.8426 - 61s/epoch - 56ms/step

Epoch 6/25

1099/1099 - 61s - loss: 875.0377 - mse: 875.0377 - mae: 23.4032 - val\_loss: 831.4785 - val\_mse: 831.4785 - val\_mae: 22.4510 - 61s/epoch - 55ms/step

Epoch 7/25

1099/1099 - 61s - loss: 857.3379 - mse: 857.3379 - mae: 23.0070 - val\_loss: 820.8966 - val\_mse: 820.8966 - val\_mae: 22.1749 - 61s/epoch - 55ms/step

Epoch 8/25

1099/1099 - 61s - loss: 843.3318 - mse: 843.3318 - mae: 22.7562 - val\_loss: 815.7764 - val\_mse: 815.7764 - val\_mae: 22.0982 - 61s/epoch - 55ms/step

Epoch 9/25

1099/1099 - 61s - loss: 831.2468 - mse: 831.2468 - mae: 22.4830 - val\_loss: 816.5062 - val\_mse: 816.5062 - val\_mae: 22.1888 - 61s/epoch - 55ms/step

Epoch 10/25

1099/1099 - 61s - loss: 820.9103 - mse: 820.9103 - mae: 22.2593 - val\_loss: 805.7620 - val\_mse: 805.7620 - val\_mae: 21.8988 - 61s/epoch - 56ms/step

Epoch 11/25

1099/1099 - 62s - loss: 809.6747 - mse: 809.6747 - mae: 22.0308 - val\_loss: 791.4181 - val\_mse: 791.4181 - val\_mae: 21.4698 - 62s/epoch - 56ms/step

Epoch 12/25

1099/1099 - 61s - loss: 799.5540 - mse: 799.5540 - mae: 21.8225 - val\_loss: 792.6760 - val\_mse: 792.6760 - val\_mae: 21.5731 - 61s/epoch - 55ms/step

Epoch 13/25

1099/1099 - 61s - loss: 788.3620 - mse: 788.3620 - mae: 21.6014 - val\_loss: 785.6972 - val\_mse: 785.6972 - val\_mae: 21.4093 - 61s/epoch - 56ms/step

Epoch 14/25

1099/1099 - 62s - loss: 778.9143 - mse: 778.9143 - mae: 21.4156 - val\_loss: 777.0561 - val\_mse: 777.0561 - val\_mae: 21.2021 - 62s/epoch - 56ms/step

Epoch 15/25

1099/1099 - 61s - loss: 771.2545 - mse: 771.2545 - mae: 21.2507 - val\_loss: 775.2806 - val\_mse: 775.2806 - val\_mae: 21.1439 - 61s/epoch - 56ms/step

Epoch 16/25

1099/1099 - 61s - loss: 763.8821 - mse: 763.8821 - mae: 21.0912 - val\_loss: 774.5029 - val\_mse: 774.5029 - val\_mae: 21.1852 - 61s/epoch - 56ms/step

Epoch 17/25

1099/1099 - 62s - loss: 758.8307 - mse: 758.8307 - mae: 21.0102 - val\_loss: 771.9975 - val\_mse: 771.9975 - val\_mae: 21.0836 - 62s/epoch - 56ms/step

Epoch 18/25

1099/1099 - 61s - loss: 751.6132 - mse: 751.6132 - mae: 20.8750 - val\_loss: 768.0151 - val\_mse: 768.0151 - val\_mae: 20.9263 - 61s/epoch - 55ms/step

Epoch 19/25

1099/1099 - 61s - loss: 748.0280 - mse: 748.0280 - mae: 20.8018 - val\_loss: 765.2794 - val\_mse: 765.2794 - val\_mae: 21.0206 - 61s/epoch - 56ms/step

Epoch 20/25

1099/1099 - 61s - loss: 743.5424 - mse: 743.5424 - mae: 20.6953 - val\_loss:

s: 756.7167 - val\_mse: 756.7167 - val\_mae: 20.6528 - 61s/epoch - 56ms/step  
Epoch 21/25  
1099/1099 - 62s - loss: 738.9544 - mse: 738.9544 - mae: 20.6218 - val\_loss:  
s: 757.4184 - val\_mse: 757.4184 - val\_mae: 20.6981 - 62s/epoch - 56ms/step  
Epoch 22/25  
1099/1099 - 61s - loss: 733.7881 - mse: 733.7881 - mae: 20.5195 - val\_loss:  
s: 757.9689 - val\_mse: 757.9689 - val\_mae: 20.7576 - 61s/epoch - 55ms/step  
Epoch 23/25  
1099/1099 - 61s - loss: 728.9540 - mse: 728.9540 - mae: 20.4306 - val\_loss:  
s: 753.0603 - val\_mse: 753.0603 - val\_mae: 20.5563 - 61s/epoch - 56ms/step  
Epoch 24/25  
1099/1099 - 61s - loss: 726.2410 - mse: 726.2410 - mae: 20.3808 - val\_loss:  
s: 750.9150 - val\_mse: 750.9150 - val\_mae: 20.5215 - 61s/epoch - 56ms/step  
Epoch 25/25  
1099/1099 - 62s - loss: 723.9215 - mse: 723.9215 - mae: 20.3374 - val\_loss:  
s: 756.8724 - val\_mse: 756.8724 - val\_mae: 20.6954 - 62s/epoch - 56ms/step

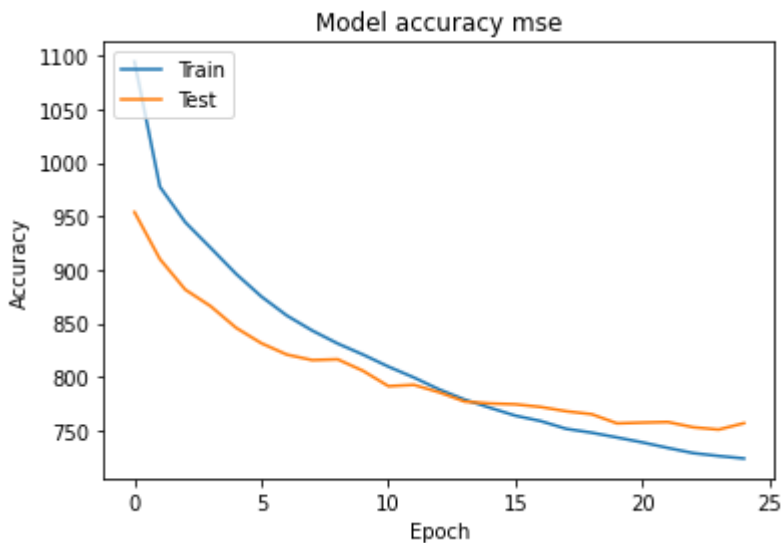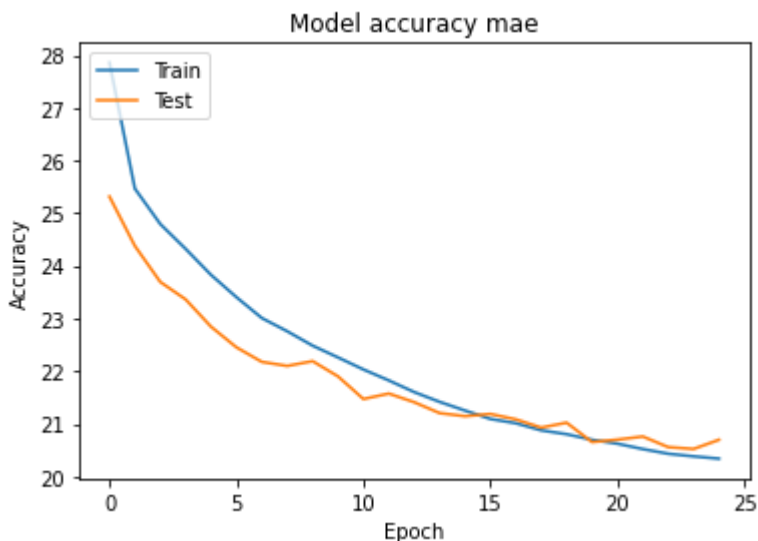

In [ ]:

```
print("Individual magnitude 1D CNN")

shape=(640,1)
filters=(64,64)
layers=(100,)
epochs = 25
model = create_1d_cnn(shape, True, filters, layers, 'relu')
model.compile(loss='mean_squared_error', optimizer=opt, metrics=['mse','mae'])

history = model.fit(
    x= x_train_magnitude, y=y_train,
    validation_data=(x_test_magnitude, y_test),
    epochs=epochs, batch_size=64, verbose=2
)

display_graphs(history)
```

## Individual magnitude 1D CNN

Epoch 1/25

1099/1099 - 73s - loss: 1216.3594 - mse: 1216.3594 - mae: 30.1913 - val\_loss: 1182.2737 - val\_mse: 1182.2737 - val\_mae: 29.6565 - 73s/epoch - 67ms/step

Epoch 2/25

1099/1099 - 72s - loss: 1132.5471 - mse: 1132.5471 - mae: 28.5943 - val\_loss: 1091.3628 - val\_mse: 1091.3628 - val\_mae: 27.9647 - 72s/epoch - 66ms/step

Epoch 3/25

1099/1099 - 76s - loss: 1098.9058 - mse: 1098.9058 - mae: 27.9285 - val\_loss: 1067.0024 - val\_mse: 1067.0024 - val\_mae: 27.5255 - 76s/epoch - 69ms/step

Epoch 4/25

1099/1099 - 72s - loss: 1073.8809 - mse: 1073.8809 - mae: 27.4522 - val\_loss: 1033.5162 - val\_mse: 1033.5162 - val\_mae: 26.8991 - 72s/epoch - 65ms/step

Epoch 5/25

1099/1099 - 72s - loss: 1040.9642 - mse: 1040.9642 - mae: 26.8747 - val\_loss: 994.1068 - val\_mse: 994.1068 - val\_mae: 26.1461 - 72s/epoch - 65ms/step

Epoch 6/25

1099/1099 - 72s - loss: 1004.5599 - mse: 1004.5599 - mae: 26.2014 - val\_loss: 962.6041 - val\_mse: 962.6041 - val\_mae: 25.4996 - 72s/epoch - 65ms/step

Epoch 7/25

1099/1099 - 72s - loss: 971.5823 - mse: 971.5823 - mae: 25.5969 - val\_loss: 936.8146 - val\_mse: 936.8146 - val\_mae: 24.9493 - 72s/epoch - 65ms/step

Epoch 8/25

1099/1099 - 72s - loss: 945.7045 - mse: 945.7045 - mae: 25.0946 - val\_loss: 914.2786 - val\_mse: 914.2786 - val\_mae: 24.5457 - 72s/epoch - 65ms/step

Epoch 9/25

1099/1099 - 72s - loss: 928.9356 - mse: 928.9356 - mae: 24.7984 - val\_loss: 901.9387 - val\_mse: 901.9387 - val\_mae: 24.2809 - 72s/epoch - 65ms/step

Epoch 10/25

1099/1099 - 72s - loss: 916.1290 - mse: 916.1290 - mae: 24.5222 - val\_loss: 892.2993 - val\_mse: 892.2993 - val\_mae: 24.0767 - 72s/epoch - 66ms/step

Epoch 11/25

1099/1099 - 72s - loss: 902.1500 - mse: 902.1500 - mae: 24.2527 - val\_loss: 877.1819 - val\_mse: 877.1819 - val\_mae: 23.6457 - 72s/epoch - 66ms/step

Epoch 12/25

1099/1099 - 72s - loss: 892.8614 - mse: 892.8614 - mae: 24.0539 - val\_loss: 877.1057 - val\_mse: 877.1057 - val\_mae: 23.7345 - 72s/epoch - 66ms/step

Epoch 13/25

1099/1099 - 73s - loss: 883.9883 - mse: 883.9883 - mae: 23.8821 - val\_loss: 858.3151 - val\_mse: 858.3151 - val\_mae: 23.1963 - 73s/epoch - 66ms/step

Epoch 14/25

1099/1099 - 73s - loss: 875.7617 - mse: 875.7617 - mae: 23.7119 - val\_loss: 861.3057 - val\_mse: 861.3057 - val\_mae: 23.3030 - 73s/epoch - 66ms/step

Epoch 15/25

1099/1099 - 73s - loss: 866.4295 - mse: 866.4295 - mae: 23.5391 - val\_loss: 862.5668 - val\_mse: 862.5668 - val\_mae: 23.3148 - 73s/epoch - 66ms/step

Epoch 16/25

1099/1099 - 75s - loss: 861.5657 - mse: 861.5657 - mae: 23.4244 - val\_loss: 842.3000 - val\_mse: 842.3000 - val\_mae: 22.7685 - 75s/epoch - 68ms/step

Epoch 17/25

1099/1099 - 72s - loss: 854.7042 - mse: 854.7042 - mae: 23.2806 - val\_loss: 849.0013 - val\_mse: 849.0013 - val\_mae: 22.9331 - 72s/epoch - 66ms/step

Epoch 18/25

1099/1099 - 72s - loss: 852.2365 - mse: 852.2365 - mae: 23.2080 - val\_loss: 840.9349 - val\_mse: 840.9349 - val\_mae: 22.7363 - 72s/epoch - 66ms/step



Epoch 19/25

1099/1099 - 73s - loss: 845.7142 - mse: 845.7142 - mae: 23.0816 - val\_loss: 834.5481 - val\_mse: 834.5481 - val\_mae: 22.6427 - 73s/epoch - 66ms/step

Epoch 20/25

1099/1099 - 73s - loss: 841.6362 - mse: 841.6362 - mae: 22.9734 - val\_loss: 833.2715 - val\_mse: 833.2715 - val\_mae: 22.5754 - 73s/epoch - 66ms/step

Epoch 21/25

1099/1099 - 73s - loss: 834.4493 - mse: 834.4493 - mae: 22.8413 - val\_loss: 832.7162 - val\_mse: 832.7162 - val\_mae: 22.5642 - 73s/epoch - 66ms/step

Epoch 22/25

1099/1099 - 73s - loss: 832.5697 - mse: 832.5697 - mae: 22.7994 - val\_loss: 830.4850 - val\_mse: 830.4850 - val\_mae: 22.4547 - 73s/epoch - 66ms/step

Epoch 23/25

1099/1099 - 72s - loss: 829.0084 - mse: 829.0084 - mae: 22.7159 - val\_loss: 845.7101 - val\_mse: 845.7101 - val\_mae: 22.9071 - 72s/epoch - 66ms/step

Epoch 24/25

1099/1099 - 72s - loss: 825.1785 - mse: 825.1785 - mae: 22.6592 - val\_loss: 822.3644 - val\_mse: 822.3644 - val\_mae: 22.2378 - 72s/epoch - 66ms/step

Epoch 25/25

1099/1099 - 72s - loss: 823.2281 - mse: 823.2281 - mae: 22.5941 - val\_loss: 820.3568 - val\_mse: 820.3568 - val\_mae: 22.2167 - 72s/epoch - 65ms/step

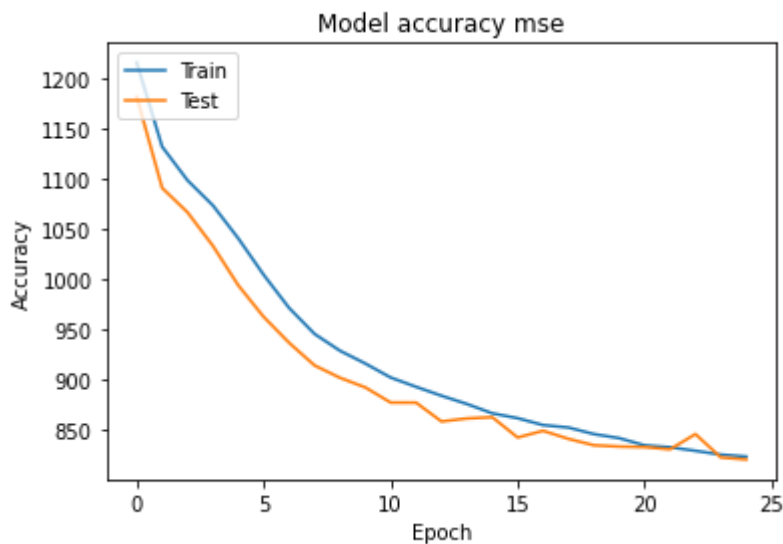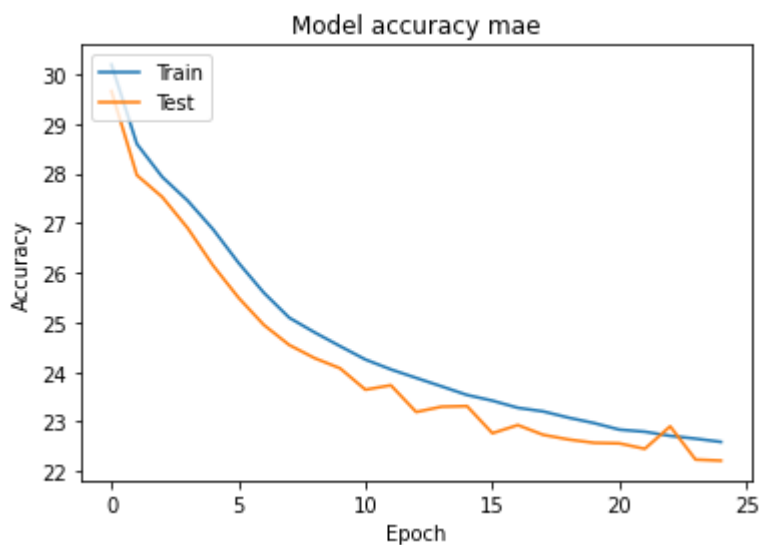

# Best Models Improvements

For the best models achieved against the data where the results are yet to plateau the epochs have been increased

In [ ]:

```
antenna_num = 8

magnitude = pd.read_csv('/content/drive/MyDrive/train_magnitude_8.csv', header=None).to_numpy()
output_data = pd.read_csv('/content/drive/MyDrive/train_outputs_8.csv', header=None).to_numpy()
phase = pd.read_csv('/content/drive/MyDrive/train_phase_8.csv', header=None).to_numpy()

data = load_data(phase, magnitude, output_data, antenna_num)

phase_data = data[0]
magnitude_data = data[1]
output_data = data[2]

reduced_data = perform_dimensionality_reduction(phase_data, magnitude_data)
phase_data = reduced_data[0]
magnitude_data = reduced_data[1]

data_split = split_test_train(phase_data, magnitude_data, output_data, 0.4)
x_train_magnitude = data_split[0]
x_test_magnitude = data_split[1]
x_train_phase = data_split[2]
x_test_phase = data_split[3]
y_train = data_split[4][:,0:2]
y_test = data_split[5][:,0:2]

lr = 0.001
epochs = 100
opt = Adam(learning_rate=lr)
```

In [ ]:

```
print("Combined phase and magnitude MLP")

layers = (640,200,10)
shape = (640,)
epochs = 300
magnitude = create_mlp(shape, layers, False, "relu")
phase = create_mlp(shape, layers, False, "relu")

model = combine_models(phase, magnitude, (10,))
model.compile(loss='mean_squared_error', optimizer=opt, metrics=['mse', 'mae'])

history = model.fit(
x=[x_train_magnitude, x_train_phase], y=y_train,
  validation_data=([x_test_magnitude, x_test_phase], y_test),
  epochs=epochs, batch_size=64, verbose=2
)

display_graphs(history)

comparison = MUSIC_metrics(data_split[5])
print("MUSIC MSE: ", comparison[1])
print("MUSIC MAE: ", comparison[0])
print("Out of range MUSIC prediction: ", len(comparison[2]))
```

Combined phase and magnitude MLP

Epoch 1/300

1099/1099 - 10s - loss: 1022.4969 - mse: 1022.4969 - mae: 26.2443 - val\_loss: 855.4550 - val\_mse: 855.4550 - val\_mae: 22.8329 - 10s/epoch - 9ms/step

Epoch 2/300

1099/1099 - 8s - loss: 861.1420 - mse: 861.1420 - mae: 22.7194 - val\_loss: 843.6713 - val\_mse: 843.6713 - val\_mae: 22.6047 - 8s/epoch - 8ms/step

Epoch 3/300

1099/1099 - 9s - loss: 838.6165 - mse: 838.6165 - mae: 22.1139 - val\_loss: 830.5241 - val\_mse: 830.5241 - val\_mae: 22.2222 - 9s/epoch - 8ms/step

Epoch 4/300

1099/1099 - 9s - loss: 827.7082 - mse: 827.7082 - mae: 21.8149 - val\_loss: 832.0359 - val\_mse: 832.0359 - val\_mae: 22.3530 - 9s/epoch - 8ms/step

Epoch 5/300

1099/1099 - 9s - loss: 819.2601 - mse: 819.2601 - mae: 21.6034 - val\_loss: 828.3931 - val\_mse: 828.3931 - val\_mae: 22.2326 - 9s/epoch - 8ms/step

Epoch 6/300

1099/1099 - 9s - loss: 814.8217 - mse: 814.8217 - mae: 21.4598 - val\_loss: 829.8304 - val\_mse: 829.8304 - val\_mae: 22.2895 - 9s/epoch - 8ms/step

Epoch 7/300

1099/1099 - 8s - loss: 812.1302 - mse: 812.1302 - mae: 21.3527 - val\_loss: 839.7855 - val\_mse: 839.7855 - val\_mae: 22.6437 - 8s/epoch - 8ms/step

Epoch 8/300

1099/1099 - 8s - loss: 807.1083 - mse: 807.1083 - mae: 21.2490 - val\_loss: 819.0689 - val\_mse: 819.0689 - val\_mae: 21.8788 - 8s/epoch - 8ms/step

Epoch 9/300

1099/1099 - 8s - loss: 803.5217 - mse: 803.5217 - mae: 21.1432 - val\_loss: 828.4592 - val\_mse: 828.4592 - val\_mae: 22.3367 - 8s/epoch - 8ms/step

Epoch 10/300

1099/1099 - 8s - loss: 801.1003 - mse: 801.1003 - mae: 21.0428 - val\_loss: 829.8442 - val\_mse: 829.8442 - val\_mae: 22.3395 - 8s/epoch - 8ms/step

Epoch 11/300

1099/1099 - 9s - loss: 798.5827 - mse: 798.5827 - mae: 20.9712 - val\_loss: 807.3620 - val\_mse: 807.3620 - val\_mae: 21.4556 - 9s/epoch - 8ms/step

Epoch 12/300

1099/1099 - 9s - loss: 796.5624 - mse: 796.5624 - mae: 20.9092 - val\_loss: 820.9234 - val\_mse: 820.9234 - val\_mae: 22.0964 - 9s/epoch - 8ms/step

Epoch 13/300

1099/1099 - 8s - loss: 792.7118 - mse: 792.7118 - mae: 20.8041 - val\_loss: 810.0483 - val\_mse: 810.0483 - val\_mae: 21.6354 - 8s/epoch - 8ms/step

Epoch 14/300

1099/1099 - 9s - loss: 789.6367 - mse: 789.6367 - mae: 20.7162 - val\_loss: 818.6429 - val\_mse: 818.6429 - val\_mae: 21.9817 - 9s/epoch - 8ms/step

Epoch 15/300

1099/1099 - 9s - loss: 786.9794 - mse: 786.9794 - mae: 20.6370 - val\_loss: 807.8371 - val\_mse: 807.8371 - val\_mae: 21.5714 - 9s/epoch - 8ms/step

Epoch 16/300

1099/1099 - 9s - loss: 785.4833 - mse: 785.4833 - mae: 20.6018 - val\_loss: 822.9161 - val\_mse: 822.9161 - val\_mae: 22.2339 - 9s/epoch - 8ms/step

Epoch 17/300

1099/1099 - 9s - loss: 782.0079 - mse: 782.0079 - mae: 20.5093 - val\_loss: 813.4305 - val\_mse: 813.4305 - val\_mae: 21.8674 - 9s/epoch - 8ms/step

Epoch 18/300

1099/1099 - 9s - loss: 781.7501 - mse: 781.7501 - mae: 20.5025 - val\_loss: 809.2002 - val\_mse: 809.2002 - val\_mae: 21.7064 - 9s/epoch - 8ms/step

Epoch 19/300

1099/1099 - 8s - loss: 778.7294 - mse: 778.7294 - mae: 20.4338 - val\_loss: 812.2675 - val\_mse: 812.2675 - val\_mae: 21.8530 - 8s/epoch - 8ms/step

Epoch 20/300

1099/1099 - 8s - loss: 777.5843 - mse: 777.5843 - mae: 20.4091 - val\_loss: 802.4937 - val\_mse: 802.4937 - val\_mae: 21.4123 - 8s/epoch - 8ms/step

Epoch 21/300

1099/1099 - 9s - loss: 774.9998 - mse: 774.9998 - mae: 20.3810 - val\_loss: 807.8304 - val\_mse: 807.8304 - val\_mae: 21.6603 - 9s/epoch - 8ms/step

Epoch 22/300

1099/1099 - 8s - loss: 773.1270 - mse: 773.1270 - mae: 20.3192 - val\_loss: 793.3500 - val\_mse: 793.3500 - val\_mae: 21.0247 - 8s/epoch - 8ms/step

Epoch 23/300

1099/1099 - 8s - loss: 769.9786 - mse: 769.9786 - mae: 20.2573 - val\_loss: 810.0205 - val\_mse: 810.0205 - val\_mae: 21.7535 - 8s/epoch - 8ms/step

Epoch 24/300

1099/1099 - 8s - loss: 766.6345 - mse: 766.6345 - mae: 20.2029 - val\_loss: 801.3423 - val\_mse: 801.3423 - val\_mae: 21.4776 - 8s/epoch - 8ms/step

Epoch 25/300

1099/1099 - 9s - loss: 762.8917 - mse: 762.8917 - mae: 20.1326 - val\_loss: 801.3749 - val\_mse: 801.3749 - val\_mae: 21.5610 - 9s/epoch - 8ms/step

Epoch 26/300

1099/1099 - 10s - loss: 759.0744 - mse: 759.0744 - mae: 20.0390 - val\_loss: 793.0901 - val\_mse: 793.0901 - val\_mae: 21.2364 - 10s/epoch - 9ms/step

Epoch 27/300

1099/1099 - 9s - loss: 751.9490 - mse: 751.9490 - mae: 19.8781 - val\_loss: 790.5316 - val\_mse: 790.5316 - val\_mae: 21.2160 - 9s/epoch - 8ms/step

Epoch 28/300

1099/1099 - 9s - loss: 744.6488 - mse: 744.6488 - mae: 19.7601 - val\_loss: 786.9468 - val\_mse: 786.9468 - val\_mae: 21.0985 - 9s/epoch - 8ms/step

Epoch 29/300

1099/1099 - 9s - loss: 739.7034 - mse: 739.7034 - mae: 19.6401 - val\_loss: 786.3522 - val\_mse: 786.3522 - val\_mae: 21.3125 - 9s/epoch - 8ms/step

Epoch 30/300

1099/1099 - 8s - loss: 730.3490 - mse: 730.3490 - mae: 19.4446 - val\_loss: 779.2560 - val\_mse: 779.2560 - val\_mae: 21.0367 - 8s/epoch - 8ms/step

Epoch 31/300

1099/1099 - 9s - loss: 721.9631 - mse: 721.9631 - mae: 19.2894 - val\_loss: 770.7354 - val\_mse: 770.7354 - val\_mae: 20.8339 - 9s/epoch - 8ms/step

Epoch 32/300

1099/1099 - 9s - loss: 712.4026 - mse: 712.4026 - mae: 19.0982 - val\_loss: 759.6879 - val\_mse: 759.6879 - val\_mae: 20.4840 - 9s/epoch - 8ms/step

Epoch 33/300

1099/1099 - 8s - loss: 702.3708 - mse: 702.3708 - mae: 18.8949 - val\_loss: 755.8035 - val\_mse: 755.8035 - val\_mae: 20.5479 - 8s/epoch - 8ms/step

Epoch 34/300

1099/1099 - 9s - loss: 688.1999 - mse: 688.1999 - mae: 18.6163 - val\_loss: 743.4545 - val\_mse: 743.4545 - val\_mae: 20.2455 - 9s/epoch - 8ms/step

Epoch 35/300

1099/1099 - 9s - loss: 679.3477 - mse: 679.3477 - mae: 18.4299 - val\_loss: 733.0758 - val\_mse: 733.0758 - val\_mae: 19.8506 - 9s/epoch - 8ms/step

Epoch 36/300

1099/1099 - 9s - loss: 669.4775 - mse: 669.4775 - mae: 18.1827 - val\_loss: 720.1097 - val\_mse: 720.1097 - val\_mae: 19.6823 - 9s/epoch - 8ms/step

Epoch 37/300

1099/1099 - 10s - loss: 657.2307 - mse: 657.2307 - mae: 17.9848 - val\_loss: 724.0890 - val\_mse: 724.0890 - val\_mae: 19.7467 - 10s/epoch - 9ms/step

Epoch 38/300

1099/1099 - 8s - loss: 645.6097 - mse: 645.6097 - mae: 17.7306 - val\_loss: 704.2900 - val\_mse: 704.2900 - val\_mae: 19.1736 - 8s/epoch - 8ms/step

Epoch 39/300

1099/1099 - 17s - loss: 642.1455 - mse: 642.1455 - mae: 17.6287 - val\_loss: 697.7875 - val\_mse: 697.7875 - val\_mae: 19.0151 - 17s/epoch - 15ms/step

Epoch 40/300

1099/1099 - 11s - loss: 629.5982 - mse: 629.5982 - mae: 17.3656 - val\_loss: 696.3932 - val\_mse: 696.3932 - val\_mae: 19.0839 - 11s/epoch - 10ms/step

Epoch 41/300

1099/1099 - 9s - loss: 623.4431 - mse: 623.4431 - mae: 17.2459 - val\_loss: 682.3514 - val\_mse: 682.3514 - val\_mae: 18.8700 - 9s/epoch - 9ms/step  
Epoch 42/300  
1099/1099 - 9s - loss: 615.2922 - mse: 615.2922 - mae: 17.0991 - val\_loss: 687.1910 - val\_mse: 687.1910 - val\_mae: 18.8694 - 9s/epoch - 8ms/step  
Epoch 43/300  
1099/1099 - 9s - loss: 603.6004 - mse: 603.6004 - mae: 16.8865 - val\_loss: 682.9293 - val\_mse: 682.9293 - val\_mae: 18.7823 - 9s/epoch - 8ms/step  
Epoch 44/300  
1099/1099 - 9s - loss: 602.8095 - mse: 602.8095 - mae: 16.8584 - val\_loss: 679.3357 - val\_mse: 679.3357 - val\_mae: 18.7213 - 9s/epoch - 8ms/step  
Epoch 45/300  
1099/1099 - 9s - loss: 597.5747 - mse: 597.5747 - mae: 16.7412 - val\_loss: 665.7534 - val\_mse: 665.7534 - val\_mae: 18.3218 - 9s/epoch - 8ms/step  
Epoch 46/300  
1099/1099 - 9s - loss: 587.0026 - mse: 587.0026 - mae: 16.5434 - val\_loss: 668.6752 - val\_mse: 668.6752 - val\_mae: 18.2038 - 9s/epoch - 8ms/step  
Epoch 47/300  
1099/1099 - 9s - loss: 581.9451 - mse: 581.9451 - mae: 16.4300 - val\_loss: 653.7612 - val\_mse: 653.7612 - val\_mae: 17.5833 - 9s/epoch - 8ms/step  
Epoch 48/300  
1099/1099 - 9s - loss: 581.0858 - mse: 581.0858 - mae: 16.3920 - val\_loss: 660.8877 - val\_mse: 660.8877 - val\_mae: 18.1516 - 9s/epoch - 8ms/step  
Epoch 49/300  
1099/1099 - 9s - loss: 574.5507 - mse: 574.5507 - mae: 16.2237 - val\_loss: 657.5861 - val\_mse: 657.5861 - val\_mae: 18.0414 - 9s/epoch - 8ms/step  
Epoch 50/300  
1099/1099 - 9s - loss: 565.7435 - mse: 565.7435 - mae: 16.0836 - val\_loss: 652.3870 - val\_mse: 652.3870 - val\_mae: 17.8461 - 9s/epoch - 8ms/step  
Epoch 51/300  
1099/1099 - 9s - loss: 559.0305 - mse: 559.0305 - mae: 15.9654 - val\_loss: 658.6175 - val\_mse: 658.6175 - val\_mae: 18.0108 - 9s/epoch - 8ms/step  
Epoch 52/300  
1099/1099 - 9s - loss: 553.9083 - mse: 553.9083 - mae: 15.8673 - val\_loss: 649.8810 - val\_mse: 649.8810 - val\_mae: 17.6297 - 9s/epoch - 8ms/step  
Epoch 53/300  
1099/1099 - 9s - loss: 548.7028 - mse: 548.7028 - mae: 15.7569 - val\_loss: 643.1924 - val\_mse: 643.1924 - val\_mae: 17.3250 - 9s/epoch - 8ms/step  
Epoch 54/300  
1099/1099 - 9s - loss: 543.8834 - mse: 543.8834 - mae: 15.6740 - val\_loss: 637.4684 - val\_mse: 637.4684 - val\_mae: 17.1760 - 9s/epoch - 8ms/step  
Epoch 55/300  
1099/1099 - 9s - loss: 540.9026 - mse: 540.9026 - mae: 15.5533 - val\_loss: 628.2073 - val\_mse: 628.2073 - val\_mae: 17.0239 - 9s/epoch - 8ms/step  
Epoch 56/300  
1099/1099 - 9s - loss: 534.7476 - mse: 534.7476 - mae: 15.4495 - val\_loss: 636.6209 - val\_mse: 636.6209 - val\_mae: 17.1073 - 9s/epoch - 8ms/step  
Epoch 57/300  
1099/1099 - 8s - loss: 526.9537 - mse: 526.9537 - mae: 15.3129 - val\_loss: 633.6901 - val\_mse: 633.6901 - val\_mae: 17.0662 - 8s/epoch - 8ms/step  
Epoch 58/300  
1099/1099 - 8s - loss: 523.1292 - mse: 523.1292 - mae: 15.1981 - val\_loss: 632.9583 - val\_mse: 632.9583 - val\_mae: 17.1169 - 8s/epoch - 8ms/step  
Epoch 59/300  
1099/1099 - 8s - loss: 520.6817 - mse: 520.6817 - mae: 15.1506 - val\_loss: 633.4597 - val\_mse: 633.4597 - val\_mae: 17.0895 - 8s/epoch - 8ms/step  
Epoch 60/300  
1099/1099 - 9s - loss: 513.7804 - mse: 513.7804 - mae: 15.0413 - val\_loss: 616.0364 - val\_mse: 616.0364 - val\_mae: 16.4474 - 9s/epoch - 8ms/step  
Epoch 61/300  
1099/1099 - 9s - loss: 510.8565 - mse: 510.8565 - mae: 14.9700 - val\_loss:

625.5502 - val\_mse: 625.5502 - val\_mae: 16.7396 - 9s/epoch - 8ms/step  
Epoch 62/300  
1099/1099 - 9s - loss: 510.8627 - mse: 510.8627 - mae: 14.9646 - val\_loss:  
636.5859 - val\_mse: 636.5859 - val\_mae: 17.1450 - 9s/epoch - 8ms/step  
Epoch 63/300  
1099/1099 - 9s - loss: 507.2660 - mse: 507.2660 - mae: 14.8860 - val\_loss:  
621.9431 - val\_mse: 621.9431 - val\_mae: 16.5714 - 9s/epoch - 8ms/step  
Epoch 64/300  
1099/1099 - 10s - loss: 499.9537 - mse: 499.9537 - mae: 14.7625 - val\_loss:  
628.0936 - val\_mse: 628.0936 - val\_mae: 16.7621 - 10s/epoch - 9ms/step  
Epoch 65/300  
1099/1099 - 9s - loss: 498.1973 - mse: 498.1973 - mae: 14.7320 - val\_loss:  
621.5251 - val\_mse: 621.5251 - val\_mae: 16.5846 - 9s/epoch - 8ms/step  
Epoch 66/300  
1099/1099 - 9s - loss: 496.7740 - mse: 496.7740 - mae: 14.6535 - val\_loss:  
621.0718 - val\_mse: 621.0718 - val\_mae: 16.6454 - 9s/epoch - 8ms/step  
Epoch 67/300  
1099/1099 - 9s - loss: 489.3140 - mse: 489.3140 - mae: 14.5214 - val\_loss:  
606.5293 - val\_mse: 606.5293 - val\_mae: 16.2913 - 9s/epoch - 8ms/step  
Epoch 68/300  
1099/1099 - 9s - loss: 488.6604 - mse: 488.6604 - mae: 14.5314 - val\_loss:  
604.2143 - val\_mse: 604.2143 - val\_mae: 16.0158 - 9s/epoch - 8ms/step  
Epoch 69/300  
1099/1099 - 9s - loss: 485.8558 - mse: 485.8558 - mae: 14.4260 - val\_loss:  
612.8434 - val\_mse: 612.8434 - val\_mae: 16.5634 - 9s/epoch - 8ms/step  
Epoch 70/300  
1099/1099 - 9s - loss: 481.5226 - mse: 481.5226 - mae: 14.3855 - val\_loss:  
607.2191 - val\_mse: 607.2191 - val\_mae: 16.3421 - 9s/epoch - 8ms/step  
Epoch 71/300  
1099/1099 - 9s - loss: 479.3391 - mse: 479.3391 - mae: 14.3205 - val\_loss:  
618.8293 - val\_mse: 618.8293 - val\_mae: 16.6528 - 9s/epoch - 8ms/step  
Epoch 72/300  
1099/1099 - 9s - loss: 474.9474 - mse: 474.9474 - mae: 14.2111 - val\_loss:  
605.7260 - val\_mse: 605.7260 - val\_mae: 16.1179 - 9s/epoch - 8ms/step  
Epoch 73/300  
1099/1099 - 9s - loss: 474.4367 - mse: 474.4367 - mae: 14.1923 - val\_loss:  
608.9464 - val\_mse: 608.9464 - val\_mae: 16.1862 - 9s/epoch - 8ms/step  
Epoch 74/300  
1099/1099 - 9s - loss: 466.3401 - mse: 466.3401 - mae: 14.0800 - val\_loss:  
607.0006 - val\_mse: 607.0006 - val\_mae: 16.1684 - 9s/epoch - 8ms/step  
Epoch 75/300  
1099/1099 - 9s - loss: 466.7829 - mse: 466.7829 - mae: 14.0374 - val\_loss:  
602.3349 - val\_mse: 602.3349 - val\_mae: 16.1695 - 9s/epoch - 8ms/step  
Epoch 76/300  
1099/1099 - 9s - loss: 469.5950 - mse: 469.5950 - mae: 14.0918 - val\_loss:  
597.9498 - val\_mse: 597.9498 - val\_mae: 15.8415 - 9s/epoch - 8ms/step  
Epoch 77/300  
1099/1099 - 9s - loss: 465.5557 - mse: 465.5557 - mae: 14.0218 - val\_loss:  
594.6542 - val\_mse: 594.6542 - val\_mae: 15.8899 - 9s/epoch - 8ms/step  
Epoch 78/300  
1099/1099 - 9s - loss: 465.1595 - mse: 465.1595 - mae: 13.9716 - val\_loss:  
594.4121 - val\_mse: 594.4121 - val\_mae: 15.7286 - 9s/epoch - 8ms/step  
Epoch 79/300  
1099/1099 - 9s - loss: 460.1762 - mse: 460.1762 - mae: 13.9094 - val\_loss:  
589.3138 - val\_mse: 589.3138 - val\_mae: 15.6605 - 9s/epoch - 8ms/step  
Epoch 80/300  
1099/1099 - 9s - loss: 454.7212 - mse: 454.7212 - mae: 13.7998 - val\_loss:  
591.7438 - val\_mse: 591.7438 - val\_mae: 15.5895 - 9s/epoch - 8ms/step  
Epoch 81/300  
1099/1099 - 9s - loss: 453.5678 - mse: 453.5678 - mae: 13.7737 - val\_loss:  
589.0897 - val\_mse: 589.0897 - val\_mae: 15.5835 - 9s/epoch - 8ms/step

Epoch 82/300

1099/1099 - 9s - loss: 453.0638 - mse: 453.0638 - mae: 13.7821 - val\_loss: 592.9932 - val\_mse: 592.9932 - val\_mae: 15.4525 - 9s/epoch - 8ms/step

Epoch 83/300

1099/1099 - 9s - loss: 445.6728 - mse: 445.6728 - mae: 13.6341 - val\_loss: 594.5712 - val\_mse: 594.5712 - val\_mae: 15.4844 - 9s/epoch - 8ms/step

Epoch 84/300

1099/1099 - 9s - loss: 450.2870 - mse: 450.2870 - mae: 13.6624 - val\_loss: 592.2300 - val\_mse: 592.2300 - val\_mae: 15.5131 - 9s/epoch - 8ms/step

Epoch 85/300

1099/1099 - 9s - loss: 446.6908 - mse: 446.6908 - mae: 13.6414 - val\_loss: 595.4446 - val\_mse: 595.4446 - val\_mae: 15.6541 - 9s/epoch - 8ms/step

Epoch 86/300

1099/1099 - 9s - loss: 437.6017 - mse: 437.6017 - mae: 13.4952 - val\_loss: 592.0041 - val\_mse: 592.0041 - val\_mae: 15.6120 - 9s/epoch - 8ms/step

Epoch 87/300

1099/1099 - 9s - loss: 438.8351 - mse: 438.8351 - mae: 13.4559 - val\_loss: 586.1174 - val\_mse: 586.1174 - val\_mae: 15.3473 - 9s/epoch - 9ms/step

Epoch 88/300

1099/1099 - 8s - loss: 438.9781 - mse: 438.9781 - mae: 13.4528 - val\_loss: 582.0752 - val\_mse: 582.0752 - val\_mae: 15.1990 - 8s/epoch - 8ms/step

Epoch 89/300

1099/1099 - 9s - loss: 430.3804 - mse: 430.3804 - mae: 13.3394 - val\_loss: 580.8557 - val\_mse: 580.8557 - val\_mae: 15.1680 - 9s/epoch - 8ms/step

Epoch 90/300

1099/1099 - 9s - loss: 432.8158 - mse: 432.8158 - mae: 13.3521 - val\_loss: 580.3282 - val\_mse: 580.3282 - val\_mae: 15.2429 - 9s/epoch - 9ms/step

Epoch 91/300

1099/1099 - 9s - loss: 434.1793 - mse: 434.1793 - mae: 13.3572 - val\_loss: 583.2032 - val\_mse: 583.2032 - val\_mae: 15.4053 - 9s/epoch - 8ms/step

Epoch 92/300

1099/1099 - 8s - loss: 425.9969 - mse: 425.9969 - mae: 13.2534 - val\_loss: 575.9684 - val\_mse: 575.9684 - val\_mae: 14.7416 - 8s/epoch - 8ms/step

Epoch 93/300

1099/1099 - 9s - loss: 423.7151 - mse: 423.7151 - mae: 13.1943 - val\_loss: 577.8475 - val\_mse: 577.8475 - val\_mae: 15.2392 - 9s/epoch - 8ms/step

Epoch 94/300

1099/1099 - 9s - loss: 421.2535 - mse: 421.2535 - mae: 13.1353 - val\_loss: 571.4086 - val\_mse: 571.4086 - val\_mae: 14.7331 - 9s/epoch - 8ms/step

Epoch 95/300

1099/1099 - 9s - loss: 424.2888 - mse: 424.2888 - mae: 13.1569 - val\_loss: 575.4647 - val\_mse: 575.4647 - val\_mae: 14.9694 - 9s/epoch - 8ms/step

Epoch 96/300

1099/1099 - 9s - loss: 423.6610 - mse: 423.6610 - mae: 13.1326 - val\_loss: 588.6313 - val\_mse: 588.6313 - val\_mae: 15.3310 - 9s/epoch - 8ms/step

Epoch 97/300

1099/1099 - 9s - loss: 420.6490 - mse: 420.6490 - mae: 13.1105 - val\_loss: 576.1852 - val\_mse: 576.1852 - val\_mae: 15.0599 - 9s/epoch - 8ms/step

Epoch 98/300

1099/1099 - 8s - loss: 421.1063 - mse: 421.1063 - mae: 13.1159 - val\_loss: 583.7602 - val\_mse: 583.7602 - val\_mae: 15.1125 - 8s/epoch - 8ms/step

Epoch 99/300

1099/1099 - 9s - loss: 419.2892 - mse: 419.2892 - mae: 13.0486 - val\_loss: 569.2313 - val\_mse: 569.2313 - val\_mae: 14.7189 - 9s/epoch - 9ms/step

Epoch 100/300

1099/1099 - 9s - loss: 412.3486 - mse: 412.3486 - mae: 12.9580 - val\_loss: 569.0666 - val\_mse: 569.0666 - val\_mae: 14.7398 - 9s/epoch - 8ms/step

Epoch 101/300

1099/1099 - 9s - loss: 413.0847 - mse: 413.0847 - mae: 12.9415 - val\_loss: 572.6134 - val\_mse: 572.6134 - val\_mae: 14.8762 - 9s/epoch - 8ms/step

Epoch 102/300



1099/1099 - 9s - loss: 417.5892 - mse: 417.5892 - mae: 13.0103 - val\_loss: 564.7835 - val\_mse: 564.7835 - val\_mae: 14.6430 - 9s/epoch - 8ms/step  
Epoch 103/300  
1099/1099 - 9s - loss: 411.0574 - mse: 411.0574 - mae: 12.8958 - val\_loss: 571.0162 - val\_mse: 571.0162 - val\_mae: 14.5574 - 9s/epoch - 8ms/step  
Epoch 104/300  
1099/1099 - 9s - loss: 409.4562 - mse: 409.4562 - mae: 12.8833 - val\_loss: 571.5467 - val\_mse: 571.5467 - val\_mae: 14.8413 - 9s/epoch - 8ms/step  
Epoch 105/300  
1099/1099 - 9s - loss: 404.6825 - mse: 404.6825 - mae: 12.7904 - val\_loss: 565.7965 - val\_mse: 565.7965 - val\_mae: 14.3533 - 9s/epoch - 8ms/step  
Epoch 106/300  
1099/1099 - 9s - loss: 406.3268 - mse: 406.3268 - mae: 12.8449 - val\_loss: 564.6174 - val\_mse: 564.6174 - val\_mae: 14.3724 - 9s/epoch - 8ms/step  
Epoch 107/300  
1099/1099 - 9s - loss: 405.8279 - mse: 405.8279 - mae: 12.8212 - val\_loss: 574.4892 - val\_mse: 574.4892 - val\_mae: 14.8784 - 9s/epoch - 8ms/step  
Epoch 108/300  
1099/1099 - 9s - loss: 407.2390 - mse: 407.2390 - mae: 12.7825 - val\_loss: 564.2562 - val\_mse: 564.2562 - val\_mae: 14.6964 - 9s/epoch - 8ms/step  
Epoch 109/300  
1099/1099 - 10s - loss: 400.5564 - mse: 400.5564 - mae: 12.7383 - val\_loss: 557.4648 - val\_mse: 557.4648 - val\_mae: 14.1400 - 10s/epoch - 9ms/step  
Epoch 110/300  
1099/1099 - 17s - loss: 402.4985 - mse: 402.4985 - mae: 12.7255 - val\_loss: 560.6191 - val\_mse: 560.6191 - val\_mae: 14.4652 - 17s/epoch - 15ms/step  
Epoch 111/300  
1099/1099 - 9s - loss: 400.0399 - mse: 400.0399 - mae: 12.6720 - val\_loss: 564.8770 - val\_mse: 564.8770 - val\_mae: 14.4907 - 9s/epoch - 8ms/step  
Epoch 112/300  
1099/1099 - 9s - loss: 395.1856 - mse: 395.1856 - mae: 12.6284 - val\_loss: 565.9094 - val\_mse: 565.9094 - val\_mae: 14.4911 - 9s/epoch - 8ms/step  
Epoch 113/300  
1099/1099 - 9s - loss: 397.8083 - mse: 397.8083 - mae: 12.6253 - val\_loss: 565.8741 - val\_mse: 565.8741 - val\_mae: 14.5489 - 9s/epoch - 8ms/step  
Epoch 114/300  
1099/1099 - 9s - loss: 396.6734 - mse: 396.6734 - mae: 12.6028 - val\_loss: 560.3052 - val\_mse: 560.3052 - val\_mae: 14.3809 - 9s/epoch - 8ms/step  
Epoch 115/300  
1099/1099 - 9s - loss: 389.8170 - mse: 389.8170 - mae: 12.4837 - val\_loss: 568.4573 - val\_mse: 568.4573 - val\_mae: 14.5836 - 9s/epoch - 8ms/step  
Epoch 116/300  
1099/1099 - 9s - loss: 389.9070 - mse: 389.9070 - mae: 12.4904 - val\_loss: 555.4127 - val\_mse: 555.4127 - val\_mae: 14.2034 - 9s/epoch - 8ms/step  
Epoch 117/300  
1099/1099 - 9s - loss: 387.0604 - mse: 387.0604 - mae: 12.4372 - val\_loss: 561.1537 - val\_mse: 561.1537 - val\_mae: 14.5755 - 9s/epoch - 8ms/step  
Epoch 118/300  
1099/1099 - 10s - loss: 386.0965 - mse: 386.0965 - mae: 12.4499 - val\_loss: 556.8687 - val\_mse: 556.8687 - val\_mae: 14.1209 - 10s/epoch - 9ms/step  
Epoch 119/300  
1099/1099 - 9s - loss: 394.4085 - mse: 394.4085 - mae: 12.5708 - val\_loss: 550.7004 - val\_mse: 550.7004 - val\_mae: 14.2114 - 9s/epoch - 8ms/step  
Epoch 120/300  
1099/1099 - 9s - loss: 384.8376 - mse: 384.8376 - mae: 12.4185 - val\_loss: 567.0982 - val\_mse: 567.0982 - val\_mae: 14.7333 - 9s/epoch - 8ms/step  
Epoch 121/300  
1099/1099 - 9s - loss: 380.5981 - mse: 380.5981 - mae: 12.3254 - val\_loss: 554.2940 - val\_mse: 554.2940 - val\_mae: 14.1516 - 9s/epoch - 8ms/step  
Epoch 122/300  
1099/1099 - 9s - loss: 380.2068 - mse: 380.2068 - mae: 12.3139 - val\_loss:

559.7746 - val\_mse: 559.7746 - val\_mae: 14.1451 - 9s/epoch - 8ms/step  
Epoch 123/300  
1099/1099 - 9s - loss: 382.5319 - mse: 382.5319 - mae: 12.3419 - val\_loss:  
555.0868 - val\_mse: 555.0868 - val\_mae: 13.9856 - 9s/epoch - 8ms/step  
Epoch 124/300  
1099/1099 - 9s - loss: 380.8128 - mse: 380.8128 - mae: 12.3140 - val\_loss:  
551.2055 - val\_mse: 551.2055 - val\_mae: 13.9340 - 9s/epoch - 8ms/step  
Epoch 125/300  
1099/1099 - 9s - loss: 376.4763 - mse: 376.4763 - mae: 12.2567 - val\_loss:  
558.6429 - val\_mse: 558.6429 - val\_mae: 14.1704 - 9s/epoch - 8ms/step  
Epoch 126/300  
1099/1099 - 9s - loss: 376.9927 - mse: 376.9927 - mae: 12.2473 - val\_loss:  
557.8055 - val\_mse: 557.8055 - val\_mae: 14.1574 - 9s/epoch - 8ms/step  
Epoch 127/300  
1099/1099 - 9s - loss: 374.9275 - mse: 374.9275 - mae: 12.1750 - val\_loss:  
553.6597 - val\_mse: 553.6597 - val\_mae: 14.0100 - 9s/epoch - 8ms/step  
Epoch 128/300  
1099/1099 - 9s - loss: 374.9955 - mse: 374.9955 - mae: 12.2285 - val\_loss:  
549.9828 - val\_mse: 549.9828 - val\_mae: 13.9705 - 9s/epoch - 8ms/step  
Epoch 129/300  
1099/1099 - 9s - loss: 375.0844 - mse: 375.0844 - mae: 12.1939 - val\_loss:  
550.4214 - val\_mse: 550.4214 - val\_mae: 14.0264 - 9s/epoch - 8ms/step  
Epoch 130/300  
1099/1099 - 9s - loss: 371.4454 - mse: 371.4454 - mae: 12.1191 - val\_loss:  
559.2820 - val\_mse: 559.2820 - val\_mae: 14.1755 - 9s/epoch - 8ms/step  
Epoch 131/300  
1099/1099 - 9s - loss: 368.1820 - mse: 368.1820 - mae: 12.1024 - val\_loss:  
559.9575 - val\_mse: 559.9575 - val\_mae: 14.0327 - 9s/epoch - 8ms/step  
Epoch 132/300  
1099/1099 - 10s - loss: 369.2526 - mse: 369.2526 - mae: 12.1081 - val\_loss:  
544.3645 - val\_mse: 544.3645 - val\_mae: 13.8799 - 10s/epoch - 9ms/step  
Epoch 133/300  
1099/1099 - 9s - loss: 368.5946 - mse: 368.5946 - mae: 12.0801 - val\_loss:  
559.1858 - val\_mse: 559.1858 - val\_mae: 14.1815 - 9s/epoch - 8ms/step  
Epoch 134/300  
1099/1099 - 9s - loss: 365.9876 - mse: 365.9876 - mae: 12.0237 - val\_loss:  
545.5040 - val\_mse: 545.5040 - val\_mae: 13.7468 - 9s/epoch - 8ms/step  
Epoch 135/300  
1099/1099 - 9s - loss: 362.5899 - mse: 362.5899 - mae: 11.9421 - val\_loss:  
548.8190 - val\_mse: 548.8190 - val\_mae: 13.7031 - 9s/epoch - 8ms/step  
Epoch 136/300  
1099/1099 - 9s - loss: 364.7711 - mse: 364.7711 - mae: 11.9745 - val\_loss:  
538.9619 - val\_mse: 538.9619 - val\_mae: 13.6051 - 9s/epoch - 8ms/step  
Epoch 137/300  
1099/1099 - 9s - loss: 363.7301 - mse: 363.7301 - mae: 11.9750 - val\_loss:  
550.3854 - val\_mse: 550.3854 - val\_mae: 13.7197 - 9s/epoch - 8ms/step  
Epoch 138/300  
1099/1099 - 9s - loss: 357.3473 - mse: 357.3473 - mae: 11.8815 - val\_loss:  
544.5272 - val\_mse: 544.5272 - val\_mae: 13.8413 - 9s/epoch - 8ms/step  
Epoch 139/300  
1099/1099 - 9s - loss: 361.1011 - mse: 361.1011 - mae: 11.9137 - val\_loss:  
547.5692 - val\_mse: 547.5692 - val\_mae: 14.0319 - 9s/epoch - 8ms/step  
Epoch 140/300  
1099/1099 - 9s - loss: 359.5272 - mse: 359.5272 - mae: 11.9113 - val\_loss:  
541.3592 - val\_mse: 541.3592 - val\_mae: 13.6260 - 9s/epoch - 8ms/step  
Epoch 141/300  
1099/1099 - 9s - loss: 362.1923 - mse: 362.1923 - mae: 11.9411 - val\_loss:  
548.6581 - val\_mse: 548.6581 - val\_mae: 13.6927 - 9s/epoch - 8ms/step  
Epoch 142/300  
1099/1099 - 9s - loss: 356.6537 - mse: 356.6537 - mae: 11.8747 - val\_loss:  
540.6080 - val\_mse: 540.6080 - val\_mae: 13.6729 - 9s/epoch - 8ms/step

Epoch 143/300  
1099/1099 - 9s - loss: 356.5000 - mse: 356.5000 - mae: 11.8636 - val\_loss: 541.6166 - val\_mse: 541.6166 - val\_mae: 13.6671 - 9s/epoch - 8ms/step

Epoch 144/300  
1099/1099 - 9s - loss: 356.3191 - mse: 356.3191 - mae: 11.8418 - val\_loss: 534.3850 - val\_mse: 534.3850 - val\_mae: 13.6249 - 9s/epoch - 8ms/step

Epoch 145/300  
1099/1099 - 9s - loss: 349.1392 - mse: 349.1392 - mae: 11.7261 - val\_loss: 548.1854 - val\_mse: 548.1854 - val\_mae: 13.6443 - 9s/epoch - 9ms/step

Epoch 146/300  
1099/1099 - 10s - loss: 357.1372 - mse: 357.1372 - mae: 11.8299 - val\_loss: 539.3022 - val\_mse: 539.3022 - val\_mae: 13.4676 - 10s/epoch - 9ms/step

Epoch 147/300  
1099/1099 - 9s - loss: 356.2889 - mse: 356.2889 - mae: 11.8201 - val\_loss: 545.4026 - val\_mse: 545.4026 - val\_mae: 13.9625 - 9s/epoch - 8ms/step

Epoch 148/300  
1099/1099 - 9s - loss: 346.4536 - mse: 346.4536 - mae: 11.6613 - val\_loss: 551.7759 - val\_mse: 551.7759 - val\_mae: 13.9485 - 9s/epoch - 8ms/step

Epoch 149/300  
1099/1099 - 9s - loss: 351.6527 - mse: 351.6527 - mae: 11.7364 - val\_loss: 548.5905 - val\_mse: 548.5905 - val\_mae: 13.5878 - 9s/epoch - 8ms/step

Epoch 150/300  
1099/1099 - 9s - loss: 351.7559 - mse: 351.7559 - mae: 11.7492 - val\_loss: 539.9276 - val\_mse: 539.9276 - val\_mae: 13.5176 - 9s/epoch - 8ms/step

Epoch 151/300  
1099/1099 - 9s - loss: 352.2544 - mse: 352.2544 - mae: 11.7491 - val\_loss: 539.2734 - val\_mse: 539.2734 - val\_mae: 13.4704 - 9s/epoch - 8ms/step

Epoch 152/300  
1099/1099 - 9s - loss: 341.1689 - mse: 341.1689 - mae: 11.5982 - val\_loss: 540.7128 - val\_mse: 540.7128 - val\_mae: 13.5911 - 9s/epoch - 8ms/step

Epoch 153/300  
1099/1099 - 9s - loss: 348.7522 - mse: 348.7522 - mae: 11.7194 - val\_loss: 541.5213 - val\_mse: 541.5213 - val\_mae: 13.7025 - 9s/epoch - 8ms/step

Epoch 154/300  
1099/1099 - 9s - loss: 352.6519 - mse: 352.6519 - mae: 11.7672 - val\_loss: 537.0009 - val\_mse: 537.0009 - val\_mae: 13.5761 - 9s/epoch - 8ms/step

Epoch 155/300  
1099/1099 - 10s - loss: 343.4111 - mse: 343.4111 - mae: 11.6235 - val\_loss: 539.5916 - val\_mse: 539.5916 - val\_mae: 13.9170 - 10s/epoch - 9ms/step

Epoch 156/300  
1099/1099 - 9s - loss: 340.7452 - mse: 340.7452 - mae: 11.5730 - val\_loss: 542.5157 - val\_mse: 542.5157 - val\_mae: 13.2272 - 9s/epoch - 8ms/step

Epoch 157/300  
1099/1099 - 9s - loss: 346.7069 - mse: 346.7069 - mae: 11.6313 - val\_loss: 533.4811 - val\_mse: 533.4811 - val\_mae: 13.3182 - 9s/epoch - 8ms/step

Epoch 158/300  
1099/1099 - 9s - loss: 336.7197 - mse: 336.7197 - mae: 11.4972 - val\_loss: 535.3875 - val\_mse: 535.3875 - val\_mae: 13.3146 - 9s/epoch - 8ms/step

Epoch 159/300  
1099/1099 - 9s - loss: 337.3365 - mse: 337.3365 - mae: 11.4845 - val\_loss: 540.4585 - val\_mse: 540.4585 - val\_mae: 13.4015 - 9s/epoch - 8ms/step

Epoch 160/300  
1099/1099 - 9s - loss: 337.8526 - mse: 337.8526 - mae: 11.4838 - val\_loss: 530.1636 - val\_mse: 530.1636 - val\_mae: 13.0720 - 9s/epoch - 8ms/step

Epoch 161/300  
1099/1099 - 9s - loss: 335.3583 - mse: 335.3583 - mae: 11.4268 - val\_loss: 535.4684 - val\_mse: 535.4684 - val\_mae: 13.0481 - 9s/epoch - 8ms/step

Epoch 162/300  
1099/1099 - 9s - loss: 333.1937 - mse: 333.1937 - mae: 11.3826 - val\_loss: 535.1964 - val\_mse: 535.1964 - val\_mae: 13.2529 - 9s/epoch - 8ms/step

Epoch 163/300

1099/1099 - 9s - loss: 340.3013 - mse: 340.3013 - mae: 11.5005 - val\_loss: 537.9747 - val\_mse: 537.9747 - val\_mae: 13.2719 - 9s/epoch - 8ms/step  
Epoch 164/300  
1099/1099 - 9s - loss: 338.0354 - mse: 338.0354 - mae: 11.4806 - val\_loss: 533.8446 - val\_mse: 533.8446 - val\_mae: 13.1585 - 9s/epoch - 8ms/step  
Epoch 165/300  
1099/1099 - 9s - loss: 339.8747 - mse: 339.8747 - mae: 11.4787 - val\_loss: 533.6016 - val\_mse: 533.6016 - val\_mae: 13.0981 - 9s/epoch - 8ms/step  
Epoch 166/300  
1099/1099 - 9s - loss: 333.4033 - mse: 333.4033 - mae: 11.3948 - val\_loss: 529.6846 - val\_mse: 529.6846 - val\_mae: 13.0703 - 9s/epoch - 8ms/step  
Epoch 167/300  
1099/1099 - 9s - loss: 332.2831 - mse: 332.2831 - mae: 11.3626 - val\_loss: 529.9427 - val\_mse: 529.9427 - val\_mae: 13.2297 - 9s/epoch - 8ms/step  
Epoch 168/300  
1099/1099 - 10s - loss: 329.3662 - mse: 329.3662 - mae: 11.3247 - val\_loss: 535.1619 - val\_mse: 535.1619 - val\_mae: 13.2861 - 10s/epoch - 9ms/step  
Epoch 169/300  
1099/1099 - 9s - loss: 331.3129 - mse: 331.3129 - mae: 11.3673 - val\_loss: 539.0766 - val\_mse: 539.0766 - val\_mae: 13.3662 - 9s/epoch - 8ms/step  
Epoch 170/300  
1099/1099 - 9s - loss: 334.6724 - mse: 334.6724 - mae: 11.3998 - val\_loss: 535.7458 - val\_mse: 535.7458 - val\_mae: 13.5692 - 9s/epoch - 8ms/step  
Epoch 171/300  
1099/1099 - 9s - loss: 336.3778 - mse: 336.3778 - mae: 11.4116 - val\_loss: 529.7239 - val\_mse: 529.7239 - val\_mae: 13.3244 - 9s/epoch - 8ms/step  
Epoch 172/300  
1099/1099 - 10s - loss: 328.5121 - mse: 328.5121 - mae: 11.3244 - val\_loss: 533.8266 - val\_mse: 533.8266 - val\_mae: 13.2417 - 10s/epoch - 9ms/step  
Epoch 173/300  
1099/1099 - 9s - loss: 329.0306 - mse: 329.0306 - mae: 11.3340 - val\_loss: 524.3960 - val\_mse: 524.3960 - val\_mae: 13.0235 - 9s/epoch - 8ms/step  
Epoch 174/300  
1099/1099 - 9s - loss: 326.8526 - mse: 326.8526 - mae: 11.3211 - val\_loss: 532.4634 - val\_mse: 532.4634 - val\_mae: 13.0720 - 9s/epoch - 8ms/step  
Epoch 175/300  
1099/1099 - 9s - loss: 323.6303 - mse: 323.6303 - mae: 11.2557 - val\_loss: 533.0765 - val\_mse: 533.0765 - val\_mae: 12.9151 - 9s/epoch - 9ms/step  
Epoch 176/300  
1099/1099 - 9s - loss: 323.2354 - mse: 323.2354 - mae: 11.2267 - val\_loss: 536.7582 - val\_mse: 536.7582 - val\_mae: 13.2790 - 9s/epoch - 8ms/step  
Epoch 177/300  
1099/1099 - 9s - loss: 322.3928 - mse: 322.3928 - mae: 11.2279 - val\_loss: 543.2991 - val\_mse: 543.2991 - val\_mae: 13.2742 - 9s/epoch - 8ms/step  
Epoch 178/300  
1099/1099 - 9s - loss: 329.4641 - mse: 329.4641 - mae: 11.2891 - val\_loss: 523.2891 - val\_mse: 523.2891 - val\_mae: 12.9410 - 9s/epoch - 8ms/step  
Epoch 179/300  
1099/1099 - 13s - loss: 321.0463 - mse: 321.0463 - mae: 11.1925 - val\_loss: 535.9701 - val\_mse: 535.9701 - val\_mae: 13.2495 - 13s/epoch - 12ms/step  
Epoch 180/300  
1099/1099 - 11s - loss: 326.0207 - mse: 326.0207 - mae: 11.2264 - val\_loss: 529.7735 - val\_mse: 529.7735 - val\_mae: 12.9036 - 11s/epoch - 10ms/step  
Epoch 181/300  
1099/1099 - 10s - loss: 327.9218 - mse: 327.9218 - mae: 11.2775 - val\_loss: 527.7487 - val\_mse: 527.7487 - val\_mae: 12.8048 - 10s/epoch - 9ms/step  
Epoch 182/300  
1099/1099 - 9s - loss: 322.1943 - mse: 322.1943 - mae: 11.1706 - val\_loss: 536.1139 - val\_mse: 536.1139 - val\_mae: 13.1517 - 9s/epoch - 8ms/step  
Epoch 183/300  
1099/1099 - 9s - loss: 318.9508 - mse: 318.9508 - mae: 11.1242 - val\_loss:

524.0286 - val\_mse: 524.0286 - val\_mae: 12.6223 - 9s/epoch - 8ms/step  
Epoch 184/300  
1099/1099 - 9s - loss: 319.9847 - mse: 319.9847 - mae: 11.1560 - val\_loss:  
533.8649 - val\_mse: 533.8649 - val\_mae: 13.1206 - 9s/epoch - 8ms/step  
Epoch 185/300  
1099/1099 - 9s - loss: 318.4498 - mse: 318.4498 - mae: 11.1330 - val\_loss:  
525.7281 - val\_mse: 525.7281 - val\_mae: 12.8861 - 9s/epoch - 8ms/step  
Epoch 186/300  
1099/1099 - 10s - loss: 315.0087 - mse: 315.0087 - mae: 11.0494 - val\_loss:  
524.0748 - val\_mse: 524.0748 - val\_mae: 12.8864 - 10s/epoch - 9ms/step  
Epoch 187/300  
1099/1099 - 9s - loss: 315.2444 - mse: 315.2444 - mae: 11.0314 - val\_loss:  
535.1678 - val\_mse: 535.1678 - val\_mae: 13.0203 - 9s/epoch - 8ms/step  
Epoch 188/300  
1099/1099 - 9s - loss: 318.2451 - mse: 318.2451 - mae: 11.1046 - val\_loss:  
526.6638 - val\_mse: 526.6638 - val\_mae: 12.7549 - 9s/epoch - 8ms/step  
Epoch 189/300  
1099/1099 - 9s - loss: 311.7537 - mse: 311.7537 - mae: 10.9695 - val\_loss:  
538.0087 - val\_mse: 538.0087 - val\_mae: 12.9435 - 9s/epoch - 8ms/step  
Epoch 190/300  
1099/1099 - 9s - loss: 315.7914 - mse: 315.7914 - mae: 11.0852 - val\_loss:  
522.9172 - val\_mse: 522.9172 - val\_mae: 12.7243 - 9s/epoch - 8ms/step  
Epoch 191/300  
1099/1099 - 9s - loss: 316.0918 - mse: 316.0918 - mae: 11.0527 - val\_loss:  
526.4165 - val\_mse: 526.4165 - val\_mae: 12.8838 - 9s/epoch - 8ms/step  
Epoch 192/300  
1099/1099 - 9s - loss: 310.3217 - mse: 310.3217 - mae: 10.9913 - val\_loss:  
529.5690 - val\_mse: 529.5690 - val\_mae: 12.9697 - 9s/epoch - 8ms/step  
Epoch 193/300  
1099/1099 - 9s - loss: 314.6762 - mse: 314.6762 - mae: 11.0432 - val\_loss:  
524.5898 - val\_mse: 524.5898 - val\_mae: 12.6779 - 9s/epoch - 8ms/step  
Epoch 194/300  
1099/1099 - 9s - loss: 310.5820 - mse: 310.5820 - mae: 10.9868 - val\_loss:  
532.4343 - val\_mse: 532.4343 - val\_mae: 12.8419 - 9s/epoch - 8ms/step  
Epoch 195/300  
1099/1099 - 9s - loss: 310.7597 - mse: 310.7597 - mae: 10.9582 - val\_loss:  
518.7574 - val\_mse: 518.7574 - val\_mae: 12.5289 - 9s/epoch - 8ms/step  
Epoch 196/300  
1099/1099 - 9s - loss: 307.6224 - mse: 307.6224 - mae: 10.8839 - val\_loss:  
516.2957 - val\_mse: 516.2957 - val\_mae: 12.6747 - 9s/epoch - 8ms/step  
Epoch 197/300  
1099/1099 - 10s - loss: 314.9184 - mse: 314.9184 - mae: 11.0197 - val\_loss:  
516.0613 - val\_mse: 516.0613 - val\_mae: 12.3936 - 10s/epoch - 9ms/step  
Epoch 198/300  
1099/1099 - 9s - loss: 314.9012 - mse: 314.9012 - mae: 11.0504 - val\_loss:  
518.5687 - val\_mse: 518.5687 - val\_mae: 12.5193 - 9s/epoch - 8ms/step  
Epoch 199/300  
1099/1099 - 9s - loss: 308.1686 - mse: 308.1686 - mae: 10.9167 - val\_loss:  
517.6878 - val\_mse: 517.6878 - val\_mae: 12.5542 - 9s/epoch - 8ms/step  
Epoch 200/300  
1099/1099 - 9s - loss: 302.2669 - mse: 302.2669 - mae: 10.8453 - val\_loss:  
516.0865 - val\_mse: 516.0865 - val\_mae: 12.4664 - 9s/epoch - 8ms/step  
Epoch 201/300  
1099/1099 - 9s - loss: 305.1717 - mse: 305.1717 - mae: 10.8559 - val\_loss:  
524.1097 - val\_mse: 524.1097 - val\_mae: 12.5264 - 9s/epoch - 8ms/step  
Epoch 202/300  
1099/1099 - 9s - loss: 305.9128 - mse: 305.9128 - mae: 10.8413 - val\_loss:  
519.4032 - val\_mse: 519.4032 - val\_mae: 12.4789 - 9s/epoch - 8ms/step  
Epoch 203/300  
1099/1099 - 9s - loss: 308.3293 - mse: 308.3293 - mae: 10.8760 - val\_loss:  
525.8481 - val\_mse: 525.8481 - val\_mae: 12.8129 - 9s/epoch - 8ms/step

Epoch 204/300

1099/1099 - 9s - loss: 306.5614 - mse: 306.5614 - mae: 10.8958 - val\_loss: 525.1072 - val\_mse: 525.1072 - val\_mae: 12.5789 - 9s/epoch - 8ms/step

Epoch 205/300

1099/1099 - 9s - loss: 303.2067 - mse: 303.2067 - mae: 10.8296 - val\_loss: 515.5260 - val\_mse: 515.5260 - val\_mae: 12.4461 - 9s/epoch - 8ms/step

Epoch 206/300

1099/1099 - 9s - loss: 303.5400 - mse: 303.5400 - mae: 10.8269 - val\_loss: 512.2003 - val\_mse: 512.2003 - val\_mae: 12.2829 - 9s/epoch - 8ms/step

Epoch 207/300

1099/1099 - 9s - loss: 298.6651 - mse: 298.6651 - mae: 10.7310 - val\_loss: 521.2186 - val\_mse: 521.2186 - val\_mae: 12.4128 - 9s/epoch - 8ms/step

Epoch 208/300

1099/1099 - 9s - loss: 302.9556 - mse: 302.9556 - mae: 10.7604 - val\_loss: 515.0061 - val\_mse: 515.0061 - val\_mae: 12.1970 - 9s/epoch - 8ms/step

Epoch 209/300

1099/1099 - 10s - loss: 299.5012 - mse: 299.5012 - mae: 10.7398 - val\_loss: 519.3391 - val\_mse: 519.3391 - val\_mae: 12.4129 - 10s/epoch - 9ms/step

Epoch 210/300

1099/1099 - 9s - loss: 304.4995 - mse: 304.4995 - mae: 10.7939 - val\_loss: 520.7670 - val\_mse: 520.7670 - val\_mae: 12.5362 - 9s/epoch - 8ms/step

Epoch 211/300

1099/1099 - 9s - loss: 300.6449 - mse: 300.6449 - mae: 10.6883 - val\_loss: 516.4608 - val\_mse: 516.4608 - val\_mae: 12.3869 - 9s/epoch - 8ms/step

Epoch 212/300

1099/1099 - 9s - loss: 295.5244 - mse: 295.5244 - mae: 10.6471 - val\_loss: 521.7621 - val\_mse: 521.7621 - val\_mae: 12.3831 - 9s/epoch - 8ms/step

Epoch 213/300

1099/1099 - 10s - loss: 298.4520 - mse: 298.4520 - mae: 10.6754 - val\_loss: 517.2720 - val\_mse: 517.2720 - val\_mae: 12.5526 - 10s/epoch - 9ms/step

Epoch 214/300

1099/1099 - 9s - loss: 295.0892 - mse: 295.0892 - mae: 10.6300 - val\_loss: 515.7536 - val\_mse: 515.7536 - val\_mae: 12.2659 - 9s/epoch - 9ms/step

Epoch 215/300

1099/1099 - 9s - loss: 293.8480 - mse: 293.8480 - mae: 10.5681 - val\_loss: 509.3891 - val\_mse: 509.3891 - val\_mae: 12.1912 - 9s/epoch - 8ms/step

Epoch 216/300

1099/1099 - 9s - loss: 294.9461 - mse: 294.9461 - mae: 10.6008 - val\_loss: 511.8404 - val\_mse: 511.8404 - val\_mae: 12.1768 - 9s/epoch - 8ms/step

Epoch 217/300

1099/1099 - 9s - loss: 293.7163 - mse: 293.7163 - mae: 10.6046 - val\_loss: 518.3167 - val\_mse: 518.3167 - val\_mae: 12.4053 - 9s/epoch - 8ms/step

Epoch 218/300

1099/1099 - 10s - loss: 294.2997 - mse: 294.2997 - mae: 10.5989 - val\_loss: 514.6874 - val\_mse: 514.6874 - val\_mae: 12.1561 - 10s/epoch - 9ms/step

Epoch 219/300

1099/1099 - 10s - loss: 294.2521 - mse: 294.2521 - mae: 10.6314 - val\_loss: 511.5397 - val\_mse: 511.5397 - val\_mae: 12.2010 - 10s/epoch - 9ms/step

Epoch 220/300

1099/1099 - 9s - loss: 290.4111 - mse: 290.4111 - mae: 10.5561 - val\_loss: 513.6531 - val\_mse: 513.6531 - val\_mae: 12.2247 - 9s/epoch - 8ms/step

Epoch 221/300

1099/1099 - 9s - loss: 295.4888 - mse: 295.4888 - mae: 10.6355 - val\_loss: 516.1520 - val\_mse: 516.1520 - val\_mae: 12.3393 - 9s/epoch - 8ms/step

Epoch 222/300

1099/1099 - 9s - loss: 293.7618 - mse: 293.7618 - mae: 10.5672 - val\_loss: 515.2380 - val\_mse: 515.2380 - val\_mae: 12.3367 - 9s/epoch - 8ms/step

Epoch 223/300

1099/1099 - 9s - loss: 291.2698 - mse: 291.2698 - mae: 10.5806 - val\_loss: 508.3618 - val\_mse: 508.3618 - val\_mae: 12.0594 - 9s/epoch - 8ms/step

Epoch 224/300

1099/1099 - 9s - loss: 287.3468 - mse: 287.3468 - mae: 10.4854 - val\_loss: 510.9046 - val\_mse: 510.9046 - val\_mae: 12.0574 - 9s/epoch - 8ms/step  
Epoch 225/300  
1099/1099 - 9s - loss: 285.8598 - mse: 285.8598 - mae: 10.4509 - val\_loss: 519.0903 - val\_mse: 519.0903 - val\_mae: 12.3662 - 9s/epoch - 8ms/step  
Epoch 226/300  
1099/1099 - 9s - loss: 292.9332 - mse: 292.9332 - mae: 10.5380 - val\_loss: 515.1440 - val\_mse: 515.1440 - val\_mae: 12.1622 - 9s/epoch - 8ms/step  
Epoch 227/300  
1099/1099 - 9s - loss: 283.0947 - mse: 283.0947 - mae: 10.3966 - val\_loss: 506.5170 - val\_mse: 506.5170 - val\_mae: 11.9871 - 9s/epoch - 8ms/step  
Epoch 228/300  
1099/1099 - 9s - loss: 284.9822 - mse: 284.9822 - mae: 10.3983 - val\_loss: 506.8776 - val\_mse: 506.8776 - val\_mae: 12.0440 - 9s/epoch - 8ms/step  
Epoch 229/300  
1099/1099 - 9s - loss: 289.4203 - mse: 289.4203 - mae: 10.4556 - val\_loss: 511.2195 - val\_mse: 511.2195 - val\_mae: 12.0902 - 9s/epoch - 8ms/step  
Epoch 230/300  
1099/1099 - 9s - loss: 281.4487 - mse: 281.4487 - mae: 10.3470 - val\_loss: 510.6892 - val\_mse: 510.6892 - val\_mae: 12.0959 - 9s/epoch - 8ms/step  
Epoch 231/300  
1099/1099 - 9s - loss: 283.9278 - mse: 283.9278 - mae: 10.3913 - val\_loss: 502.3643 - val\_mse: 502.3643 - val\_mae: 11.8632 - 9s/epoch - 8ms/step  
Epoch 232/300  
1099/1099 - 9s - loss: 280.6975 - mse: 280.6975 - mae: 10.3104 - val\_loss: 499.9571 - val\_mse: 499.9571 - val\_mae: 11.8206 - 9s/epoch - 8ms/step  
Epoch 233/300  
1099/1099 - 9s - loss: 276.4212 - mse: 276.4212 - mae: 10.2267 - val\_loss: 509.8306 - val\_mse: 509.8306 - val\_mae: 11.8917 - 9s/epoch - 8ms/step  
Epoch 234/300  
1099/1099 - 9s - loss: 283.0117 - mse: 283.0117 - mae: 10.3619 - val\_loss: 500.8110 - val\_mse: 500.8110 - val\_mae: 12.0443 - 9s/epoch - 8ms/step  
Epoch 235/300  
1099/1099 - 9s - loss: 282.6183 - mse: 282.6183 - mae: 10.3308 - val\_loss: 505.5912 - val\_mse: 505.5912 - val\_mae: 12.1514 - 9s/epoch - 8ms/step  
Epoch 236/300  
1099/1099 - 10s - loss: 278.9891 - mse: 278.9891 - mae: 10.2833 - val\_loss: 503.8743 - val\_mse: 503.8743 - val\_mae: 11.9908 - 10s/epoch - 9ms/step  
Epoch 237/300  
1099/1099 - 9s - loss: 273.4027 - mse: 273.4027 - mae: 10.1938 - val\_loss: 514.2939 - val\_mse: 514.2939 - val\_mae: 12.0523 - 9s/epoch - 8ms/step  
Epoch 238/300  
1099/1099 - 9s - loss: 276.7922 - mse: 276.7922 - mae: 10.2279 - val\_loss: 510.0482 - val\_mse: 510.0482 - val\_mae: 12.0152 - 9s/epoch - 9ms/step  
Epoch 239/300  
1099/1099 - 9s - loss: 276.4099 - mse: 276.4099 - mae: 10.2646 - val\_loss: 509.9658 - val\_mse: 509.9658 - val\_mae: 11.8347 - 9s/epoch - 8ms/step  
Epoch 240/300  
1099/1099 - 10s - loss: 272.4333 - mse: 272.4333 - mae: 10.1559 - val\_loss: 501.8195 - val\_mse: 501.8195 - val\_mae: 11.8620 - 10s/epoch - 9ms/step  
Epoch 241/300  
1099/1099 - 9s - loss: 277.6859 - mse: 277.6859 - mae: 10.2101 - val\_loss: 503.9290 - val\_mse: 503.9290 - val\_mae: 11.8337 - 9s/epoch - 8ms/step  
Epoch 242/300  
1099/1099 - 9s - loss: 268.0371 - mse: 268.0371 - mae: 10.0387 - val\_loss: 504.3067 - val\_mse: 504.3067 - val\_mae: 11.7817 - 9s/epoch - 8ms/step  
Epoch 243/300  
1099/1099 - 12s - loss: 273.0778 - mse: 273.0778 - mae: 10.1399 - val\_loss: 506.6946 - val\_mse: 506.6946 - val\_mae: 11.8960 - 12s/epoch - 11ms/step  
Epoch 244/300  
1099/1099 - 14s - loss: 274.8676 - mse: 274.8676 - mae: 10.1699 - val\_loss:

s: 502.1089 - val\_mse: 502.1089 - val\_mae: 11.9017 - 14s/epoch - 13ms/step  
Epoch 245/300  
1099/1099 - 11s - loss: 271.2878 - mse: 271.2878 - mae: 10.1078 - val\_loss:  
s: 497.6656 - val\_mse: 497.6656 - val\_mae: 11.9180 - 11s/epoch - 10ms/step  
Epoch 246/300  
1099/1099 - 9s - loss: 265.0642 - mse: 265.0642 - mae: 10.0271 - val\_loss:  
504.6465 - val\_mse: 504.6465 - val\_mae: 11.6872 - 9s/epoch - 9ms/step  
Epoch 247/300  
1099/1099 - 9s - loss: 269.7279 - mse: 269.7279 - mae: 10.0759 - val\_loss:  
503.8042 - val\_mse: 503.8042 - val\_mae: 11.8155 - 9s/epoch - 8ms/step  
Epoch 248/300  
1099/1099 - 9s - loss: 267.5490 - mse: 267.5490 - mae: 10.0632 - val\_loss:  
510.8550 - val\_mse: 510.8550 - val\_mae: 11.8293 - 9s/epoch - 8ms/step  
Epoch 249/300  
1099/1099 - 9s - loss: 269.8728 - mse: 269.8728 - mae: 10.0671 - val\_loss:  
504.9209 - val\_mse: 504.9209 - val\_mae: 11.7837 - 9s/epoch - 8ms/step  
Epoch 250/300  
1099/1099 - 9s - loss: 274.8593 - mse: 274.8593 - mae: 10.1389 - val\_loss:  
501.8802 - val\_mse: 501.8802 - val\_mae: 11.9925 - 9s/epoch - 8ms/step  
Epoch 251/300  
1099/1099 - 10s - loss: 269.8032 - mse: 269.8032 - mae: 10.0558 - val\_loss:  
s: 509.4117 - val\_mse: 509.4117 - val\_mae: 11.8860 - 10s/epoch - 9ms/step  
Epoch 252/300  
1099/1099 - 9s - loss: 267.5594 - mse: 267.5594 - mae: 10.0190 - val\_loss:  
503.2235 - val\_mse: 503.2235 - val\_mae: 11.8155 - 9s/epoch - 8ms/step  
Epoch 253/300  
1099/1099 - 9s - loss: 268.0284 - mse: 268.0284 - mae: 10.0236 - val\_loss:  
503.7684 - val\_mse: 503.7684 - val\_mae: 11.6912 - 9s/epoch - 9ms/step  
Epoch 254/300  
1099/1099 - 9s - loss: 268.9388 - mse: 268.9388 - mae: 10.0237 - val\_loss:  
502.2617 - val\_mse: 502.2617 - val\_mae: 11.7572 - 9s/epoch - 8ms/step  
Epoch 255/300  
1099/1099 - 9s - loss: 268.0262 - mse: 268.0262 - mae: 10.0252 - val\_loss:  
506.2819 - val\_mse: 506.2819 - val\_mae: 11.9417 - 9s/epoch - 8ms/step  
Epoch 256/300  
1099/1099 - 9s - loss: 274.4170 - mse: 274.4170 - mae: 10.1081 - val\_loss:  
507.8145 - val\_mse: 507.8145 - val\_mae: 11.8603 - 9s/epoch - 8ms/step  
Epoch 257/300  
1099/1099 - 9s - loss: 275.5645 - mse: 275.5645 - mae: 10.1222 - val\_loss:  
506.9027 - val\_mse: 506.9027 - val\_mae: 11.8377 - 9s/epoch - 8ms/step  
Epoch 258/300  
1099/1099 - 9s - loss: 267.7637 - mse: 267.7637 - mae: 10.0286 - val\_loss:  
508.9046 - val\_mse: 508.9046 - val\_mae: 11.9103 - 9s/epoch - 8ms/step  
Epoch 259/300  
1099/1099 - 8s - loss: 267.5609 - mse: 267.5609 - mae: 10.0188 - val\_loss:  
500.2694 - val\_mse: 500.2694 - val\_mae: 11.5985 - 8s/epoch - 8ms/step  
Epoch 260/300  
1099/1099 - 9s - loss: 267.8717 - mse: 267.8717 - mae: 9.9882 - val\_loss:  
508.0703 - val\_mse: 508.0703 - val\_mae: 12.0624 - 9s/epoch - 9ms/step  
Epoch 261/300  
1099/1099 - 9s - loss: 263.6337 - mse: 263.6337 - mae: 9.9748 - val\_loss:  
500.9661 - val\_mse: 500.9661 - val\_mae: 11.8693 - 9s/epoch - 8ms/step  
Epoch 262/300  
1099/1099 - 9s - loss: 266.2018 - mse: 266.2018 - mae: 9.9545 - val\_loss:  
510.7576 - val\_mse: 510.7576 - val\_mae: 11.8360 - 9s/epoch - 8ms/step  
Epoch 263/300  
1099/1099 - 9s - loss: 262.2680 - mse: 262.2680 - mae: 9.9328 - val\_loss:  
494.4075 - val\_mse: 494.4075 - val\_mae: 11.4997 - 9s/epoch - 9ms/step  
Epoch 264/300  
1099/1099 - 9s - loss: 260.6255 - mse: 260.6255 - mae: 9.9168 - val\_loss:  
503.1224 - val\_mse: 503.1224 - val\_mae: 11.7042 - 9s/epoch - 8ms/step



Epoch 265/300  
1099/1099 - 9s - loss: 260.6905 - mse: 260.6905 - mae: 9.8550 - val\_loss: 498.2226 - val\_mse: 498.2226 - val\_mae: 11.5192 - 9s/epoch - 8ms/step

Epoch 266/300  
1099/1099 - 9s - loss: 263.1281 - mse: 263.1281 - mae: 9.9111 - val\_loss: 500.4494 - val\_mse: 500.4494 - val\_mae: 11.5724 - 9s/epoch - 8ms/step

Epoch 267/300  
1099/1099 - 9s - loss: 262.9058 - mse: 262.9058 - mae: 9.9359 - val\_loss: 497.9618 - val\_mse: 497.9618 - val\_mae: 11.6870 - 9s/epoch - 8ms/step

Epoch 268/300  
1099/1099 - 9s - loss: 260.7508 - mse: 260.7508 - mae: 9.8864 - val\_loss: 507.9700 - val\_mse: 507.9700 - val\_mae: 11.8011 - 9s/epoch - 8ms/step

Epoch 269/300  
1099/1099 - 9s - loss: 260.9876 - mse: 260.9876 - mae: 9.8917 - val\_loss: 507.1066 - val\_mse: 507.1066 - val\_mae: 11.5743 - 9s/epoch - 8ms/step

Epoch 270/300  
1099/1099 - 9s - loss: 257.5834 - mse: 257.5834 - mae: 9.8152 - val\_loss: 501.6868 - val\_mse: 501.6868 - val\_mae: 11.7981 - 9s/epoch - 9ms/step

Epoch 271/300  
1099/1099 - 9s - loss: 256.9724 - mse: 256.9724 - mae: 9.8228 - val\_loss: 504.9720 - val\_mse: 504.9720 - val\_mae: 11.6388 - 9s/epoch - 8ms/step

Epoch 272/300  
1099/1099 - 9s - loss: 261.7279 - mse: 261.7279 - mae: 9.8909 - val\_loss: 493.9909 - val\_mse: 493.9909 - val\_mae: 11.5465 - 9s/epoch - 8ms/step

Epoch 273/300  
1099/1099 - 9s - loss: 256.3964 - mse: 256.3964 - mae: 9.8062 - val\_loss: 502.8134 - val\_mse: 502.8134 - val\_mae: 11.5075 - 9s/epoch - 8ms/step

Epoch 274/300  
1099/1099 - 9s - loss: 263.7243 - mse: 263.7243 - mae: 9.9054 - val\_loss: 499.9871 - val\_mse: 499.9871 - val\_mae: 11.5886 - 9s/epoch - 8ms/step

Epoch 275/300  
1099/1099 - 9s - loss: 256.1672 - mse: 256.1672 - mae: 9.7868 - val\_loss: 505.3535 - val\_mse: 505.3535 - val\_mae: 11.5847 - 9s/epoch - 8ms/step

Epoch 276/300  
1099/1099 - 9s - loss: 258.8184 - mse: 258.8184 - mae: 9.8266 - val\_loss: 501.2555 - val\_mse: 501.2555 - val\_mae: 11.7085 - 9s/epoch - 8ms/step

Epoch 277/300  
1099/1099 - 9s - loss: 258.3631 - mse: 258.3631 - mae: 9.8280 - val\_loss: 501.4131 - val\_mse: 501.4131 - val\_mae: 11.8766 - 9s/epoch - 8ms/step

Epoch 278/300  
1099/1099 - 10s - loss: 256.2561 - mse: 256.2561 - mae: 9.7753 - val\_loss: 503.3647 - val\_mse: 503.3647 - val\_mae: 11.7554 - 10s/epoch - 9ms/step

Epoch 279/300  
1099/1099 - 9s - loss: 250.8340 - mse: 250.8340 - mae: 9.6921 - val\_loss: 495.6674 - val\_mse: 495.6674 - val\_mae: 11.4859 - 9s/epoch - 8ms/step

Epoch 280/300  
1099/1099 - 9s - loss: 255.4832 - mse: 255.4832 - mae: 9.7607 - val\_loss: 494.8235 - val\_mse: 494.8235 - val\_mae: 11.3836 - 9s/epoch - 8ms/step

Epoch 281/300  
1099/1099 - 10s - loss: 252.9193 - mse: 252.9193 - mae: 9.7229 - val\_loss: 498.0021 - val\_mse: 498.0021 - val\_mae: 11.4526 - 10s/epoch - 9ms/step

Epoch 282/300  
1099/1099 - 10s - loss: 252.3950 - mse: 252.3950 - mae: 9.7104 - val\_loss: 496.6890 - val\_mse: 496.6890 - val\_mae: 11.7511 - 10s/epoch - 9ms/step

Epoch 283/300  
1099/1099 - 9s - loss: 257.0122 - mse: 257.0122 - mae: 9.7816 - val\_loss: 495.6813 - val\_mse: 495.6813 - val\_mae: 11.7497 - 9s/epoch - 8ms/step

Epoch 284/300  
1099/1099 - 10s - loss: 251.0080 - mse: 251.0080 - mae: 9.7080 - val\_loss: 505.0247 - val\_mse: 505.0247 - val\_mae: 11.7095 - 10s/epoch - 9ms/step

Epoch 285/300

1099/1099 - 9s - loss: 251.0114 - mse: 251.0114 - mae: 9.6643 - val\_loss: 499.8742 - val\_mse: 499.8742 - val\_mae: 11.3318 - 9s/epoch - 8ms/step  
Epoch 286/300  
1099/1099 - 9s - loss: 244.2042 - mse: 244.2042 - mae: 9.5795 - val\_loss: 492.5712 - val\_mse: 492.5712 - val\_mae: 11.4057 - 9s/epoch - 9ms/step  
Epoch 287/300  
1099/1099 - 9s - loss: 250.1693 - mse: 250.1693 - mae: 9.6657 - val\_loss: 492.1859 - val\_mse: 492.1859 - val\_mae: 11.4032 - 9s/epoch - 8ms/step  
Epoch 288/300  
1099/1099 - 10s - loss: 249.3291 - mse: 249.3291 - mae: 9.6587 - val\_loss: 502.3750 - val\_mse: 502.3750 - val\_mae: 11.7113 - 10s/epoch - 9ms/step  
Epoch 289/300  
1099/1099 - 9s - loss: 253.0388 - mse: 253.0388 - mae: 9.7280 - val\_loss: 500.9734 - val\_mse: 500.9734 - val\_mae: 11.5664 - 9s/epoch - 9ms/step  
Epoch 290/300  
1099/1099 - 9s - loss: 256.3692 - mse: 256.3692 - mae: 9.7521 - val\_loss: 498.5526 - val\_mse: 498.5526 - val\_mae: 11.6161 - 9s/epoch - 8ms/step  
Epoch 291/300  
1099/1099 - 10s - loss: 257.3838 - mse: 257.3838 - mae: 9.7640 - val\_loss: 495.3896 - val\_mse: 495.3896 - val\_mae: 11.5305 - 10s/epoch - 9ms/step  
Epoch 292/300  
1099/1099 - 9s - loss: 254.2761 - mse: 254.2761 - mae: 9.7081 - val\_loss: 506.7005 - val\_mse: 506.7005 - val\_mae: 11.7651 - 9s/epoch - 9ms/step  
Epoch 293/300  
1099/1099 - 9s - loss: 252.2094 - mse: 252.2094 - mae: 9.6767 - val\_loss: 497.3764 - val\_mse: 497.3764 - val\_mae: 11.7043 - 9s/epoch - 8ms/step  
Epoch 294/300  
1099/1099 - 10s - loss: 255.8993 - mse: 255.8993 - mae: 9.7304 - val\_loss: 502.7736 - val\_mse: 502.7736 - val\_mae: 11.5469 - 10s/epoch - 9ms/step  
Epoch 295/300  
1099/1099 - 9s - loss: 246.4120 - mse: 246.4120 - mae: 9.6072 - val\_loss: 507.2583 - val\_mse: 507.2583 - val\_mae: 11.7027 - 9s/epoch - 8ms/step  
Epoch 296/300  
1099/1099 - 9s - loss: 250.9308 - mse: 250.9308 - mae: 9.6571 - val\_loss: 504.6384 - val\_mse: 504.6384 - val\_mae: 11.7024 - 9s/epoch - 8ms/step  
Epoch 297/300  
1099/1099 - 9s - loss: 254.8535 - mse: 254.8535 - mae: 9.6802 - val\_loss: 498.5304 - val\_mse: 498.5304 - val\_mae: 11.5274 - 9s/epoch - 8ms/step  
Epoch 298/300  
1099/1099 - 9s - loss: 251.2352 - mse: 251.2352 - mae: 9.6544 - val\_loss: 501.6738 - val\_mse: 501.6738 - val\_mae: 11.6417 - 9s/epoch - 8ms/step  
Epoch 299/300  
1099/1099 - 9s - loss: 249.1095 - mse: 249.1095 - mae: 9.6089 - val\_loss: 496.4703 - val\_mse: 496.4703 - val\_mae: 11.5765 - 9s/epoch - 8ms/step  
Epoch 300/300  
1099/1099 - 9s - loss: 251.9662 - mse: 251.9662 - mae: 9.6653 - val\_loss: 496.1616 - val\_mse: 496.1616 - val\_mae: 11.4469 - 9s/epoch - 8ms/step

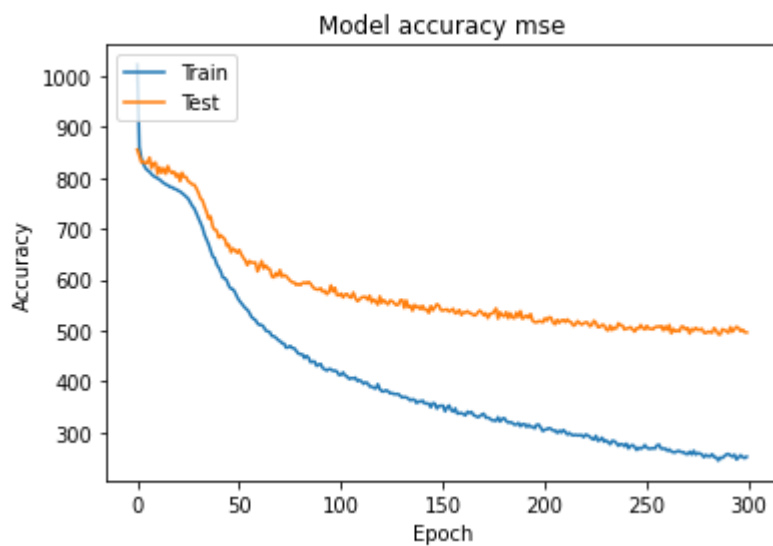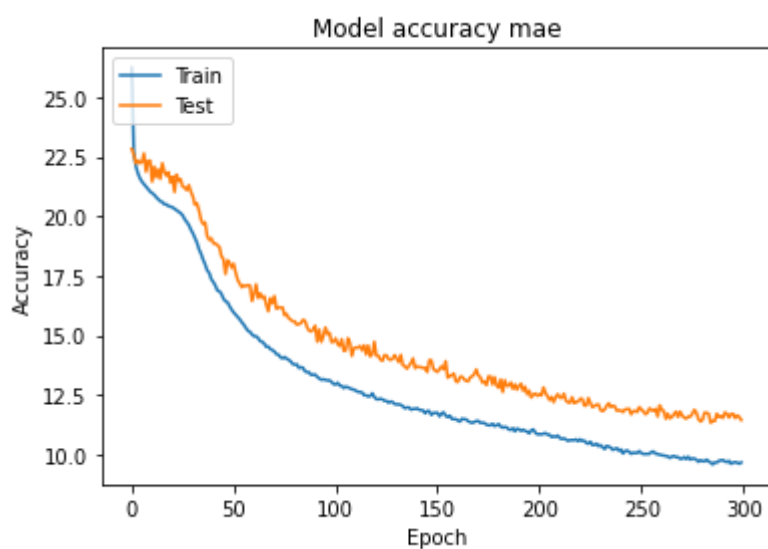

MUSIC MSE: 1375.568

MUSIC MAE: 21.1539

Out of range MUSIC prediction: 0

In [ ]:

```
print("Combined phase and magnitude 1D CNN")

shape=(640,1)
filters=(64,64)
layers=(100, )
epochs = 100

phase = create_1d_cnn(shape, False, filters, layers, 'relu')
magnitude = create_1d_cnn(shape, False, filters, layers, 'relu')

model = combine_models(phase, magnitude, (10,))
model.compile(loss='mean_squared_error', optimizer=opt, metrics=['mse', 'mae'])

history = model.fit(
x=[x_train_magnitude, x_train_phase], y=y_train,
  validation_data=([x_test_magnitude, x_test_phase], y_test),
  epochs=epochs, batch_size=64, verbose=2
)

display_graphs(history)

comparison = MUSIC_metrics(data_split[5])
print("MUSIC MSE: ", comparison[1])
print("MUSIC MAE: ", comparison[0])
print("Out of range MUSIC prediction: ", len(comparison[2]))
```

Combined phase and magnitude 1D CNN

Epoch 1/100

1099/1099 - 124s - loss: 1220.7885 - mse: 1220.7885 - mae: 30.2648 - val\_loss: 1219.1746 - val\_mse: 1219.1746 - val\_mae: 30.2258 - 124s/epoch - 113ms/step

Epoch 2/100

1099/1099 - 122s - loss: 1220.5573 - mse: 1220.5573 - mae: 30.2630 - val\_loss: 1219.1036 - val\_mse: 1219.1036 - val\_mae: 30.2252 - 122s/epoch - 111ms/step

Epoch 3/100

1099/1099 - 121s - loss: 1178.0038 - mse: 1178.0038 - mae: 29.4432 - val\_loss: 1010.7211 - val\_mse: 1010.7211 - val\_mae: 26.5587 - 121s/epoch - 110ms/step

Epoch 4/100

1099/1099 - 122s - loss: 1021.4159 - mse: 1021.4159 - mae: 26.3555 - val\_loss: 941.4464 - val\_mse: 941.4464 - val\_mae: 25.2038 - 122s/epoch - 111ms/step

Epoch 5/100

1099/1099 - 121s - loss: 975.1997 - mse: 975.1997 - mae: 25.3933 - val\_loss: 902.6898 - val\_mse: 902.6898 - val\_mae: 24.2557 - 121s/epoch - 110ms/step

Epoch 6/100

1099/1099 - 121s - loss: 947.4227 - mse: 947.4227 - mae: 24.8150 - val\_loss: 882.8874 - val\_mse: 882.8874 - val\_mae: 23.9157 - 121s/epoch - 110ms/step

Epoch 7/100

1099/1099 - 121s - loss: 919.3404 - mse: 919.3404 - mae: 24.2317 - val\_loss: 857.3107 - val\_mse: 857.3107 - val\_mae: 23.2801 - 121s/epoch - 110ms/step

Epoch 8/100

1099/1099 - 121s - loss: 896.7301 - mse: 896.7301 - mae: 23.7584 - val\_loss: 838.5197 - val\_mse: 838.5197 - val\_mae: 22.7927 - 121s/epoch - 110ms/step

Epoch 9/100

1099/1099 - 121s - loss: 877.3640 - mse: 877.3640 - mae: 23.3636 - val\_loss: 822.7529 - val\_mse: 822.7529 - val\_mae: 22.3153 - 121s/epoch - 110ms/step

Epoch 10/100

1099/1099 - 121s - loss: 860.5796 - mse: 860.5796 - mae: 22.9772 - val\_loss: 822.8441 - val\_mse: 822.8441 - val\_mae: 22.3612 - 121s/epoch - 110ms/step

Epoch 11/100

1099/1099 - 122s - loss: 842.6853 - mse: 842.6853 - mae: 22.6087 - val\_loss: 795.9397 - val\_mse: 795.9397 - val\_mae: 21.4368 - 122s/epoch - 111ms/step

Epoch 12/100

1099/1099 - 122s - loss: 832.0893 - mse: 832.0893 - mae: 22.3873 - val\_loss: 804.6470 - val\_mse: 804.6470 - val\_mae: 21.8973 - 122s/epoch - 111ms/step

Epoch 13/100

1099/1099 - 123s - loss: 822.1264 - mse: 822.1264 - mae: 22.1642 - val\_loss: 793.2888 - val\_mse: 793.2888 - val\_mae: 21.4496 - 123s/epoch - 112ms/step

Epoch 14/100

1099/1099 - 123s - loss: 811.7425 - mse: 811.7425 - mae: 21.9459 - val\_loss: 791.2841 - val\_mse: 791.2841 - val\_mae: 21.5694 - 123s/epoch - 112ms/step

Epoch 15/100

1099/1099 - 123s - loss: 803.8261 - mse: 803.8261 - mae: 21.7612 - val\_loss: 773.9667 - val\_mse: 773.9667 - val\_mae: 20.9762 - 123s/epoch - 112ms/step

Epoch 16/100

1099/1099 - 122s - loss: 794.2652 - mse: 794.2652 - mae: 21.5845 - val\_loss: 777.9991 - val\_mse: 777.9991 - val\_mae: 21.2406 - 122s/epoch - 111ms/st  
ep

Epoch 17/100

1099/1099 - 121s - loss: 785.1017 - mse: 785.1017 - mae: 21.3796 - val\_loss: 773.6901 - val\_mse: 773.6901 - val\_mae: 21.2202 - 121s/epoch - 110ms/st  
ep

Epoch 18/100

1099/1099 - 121s - loss: 774.4182 - mse: 774.4182 - mae: 21.1729 - val\_loss: 762.1163 - val\_mse: 762.1163 - val\_mae: 20.7938 - 121s/epoch - 110ms/st  
ep

Epoch 19/100

1099/1099 - 122s - loss: 762.9670 - mse: 762.9670 - mae: 20.9315 - val\_loss: 769.5239 - val\_mse: 769.5239 - val\_mae: 21.1745 - 122s/epoch - 111ms/st  
ep

Epoch 20/100

1099/1099 - 121s - loss: 756.5504 - mse: 756.5504 - mae: 20.7920 - val\_loss: 751.6793 - val\_mse: 751.6793 - val\_mae: 20.6618 - 121s/epoch - 110ms/st  
ep

Epoch 21/100

1099/1099 - 121s - loss: 749.5264 - mse: 749.5264 - mae: 20.6585 - val\_loss: 749.2751 - val\_mse: 749.2751 - val\_mae: 20.6283 - 121s/epoch - 110ms/st  
ep

Epoch 22/100

1099/1099 - 121s - loss: 742.0618 - mse: 742.0618 - mae: 20.5091 - val\_loss: 737.7689 - val\_mse: 737.7689 - val\_mae: 20.3217 - 121s/epoch - 110ms/st  
ep

Epoch 23/100

1099/1099 - 122s - loss: 734.8785 - mse: 734.8785 - mae: 20.3854 - val\_loss: 738.0788 - val\_mse: 738.0788 - val\_mae: 20.3814 - 122s/epoch - 111ms/st  
ep

Epoch 24/100

1099/1099 - 122s - loss: 729.8777 - mse: 729.8777 - mae: 20.2637 - val\_loss: 735.2083 - val\_mse: 735.2083 - val\_mae: 20.3310 - 122s/epoch - 111ms/st  
ep

Epoch 25/100

1099/1099 - 122s - loss: 724.8394 - mse: 724.8394 - mae: 20.1535 - val\_loss: 725.9302 - val\_mse: 725.9302 - val\_mae: 20.1165 - 122s/epoch - 111ms/st  
ep

Epoch 26/100

1099/1099 - 121s - loss: 715.6844 - mse: 715.6844 - mae: 19.9910 - val\_loss: 722.1128 - val\_mse: 722.1128 - val\_mae: 20.0095 - 121s/epoch - 110ms/st  
ep

Epoch 27/100

1099/1099 - 121s - loss: 711.1405 - mse: 711.1405 - mae: 19.8682 - val\_loss: 716.4858 - val\_mse: 716.4858 - val\_mae: 19.8730 - 121s/epoch - 110ms/st  
ep

Epoch 28/100

1099/1099 - 121s - loss: 704.0187 - mse: 704.0187 - mae: 19.7366 - val\_loss: 708.4234 - val\_mse: 708.4234 - val\_mae: 19.6742 - 121s/epoch - 110ms/st  
ep

Epoch 29/100

1099/1099 - 122s - loss: 699.8266 - mse: 699.8266 - mae: 19.6587 - val\_loss: 708.0591 - val\_mse: 708.0591 - val\_mae: 19.7538 - 122s/epoch - 111ms/st  
ep

Epoch 30/100

1099/1099 - 122s - loss: 686.9718 - mse: 686.9718 - mae: 19.4090 - val\_loss: 699.0013 - val\_mse: 699.0013 - val\_mae: 19.6089 - 122s/epoch - 111ms/st  
ep

Epoch 31/100

1099/1099 - 121s - loss: 680.9982 - mse: 680.9982 - mae: 19.2841 - val\_loss: 688.3813 - val\_mse: 688.3813 - val\_mae: 19.2088 - 121s/epoch - 110ms/step  
Epoch 32/100  
1099/1099 - 121s - loss: 672.8629 - mse: 672.8629 - mae: 19.1187 - val\_loss: 686.9972 - val\_mse: 686.9972 - val\_mae: 19.2455 - 121s/epoch - 110ms/step  
Epoch 33/100  
1099/1099 - 121s - loss: 667.9332 - mse: 667.9332 - mae: 19.0181 - val\_loss: 684.6542 - val\_mse: 684.6542 - val\_mae: 19.2532 - 121s/epoch - 110ms/step  
Epoch 34/100  
1099/1099 - 122s - loss: 661.8458 - mse: 661.8458 - mae: 18.8950 - val\_loss: 680.7401 - val\_mse: 680.7401 - val\_mae: 19.1619 - 122s/epoch - 111ms/step  
Epoch 35/100  
1099/1099 - 121s - loss: 657.2310 - mse: 657.2310 - mae: 18.8123 - val\_loss: 677.2433 - val\_mse: 677.2433 - val\_mae: 19.1148 - 121s/epoch - 110ms/step  
Epoch 36/100  
1099/1099 - 121s - loss: 649.3768 - mse: 649.3768 - mae: 18.6516 - val\_loss: 666.0004 - val\_mse: 666.0004 - val\_mae: 18.8584 - 121s/epoch - 110ms/step  
Epoch 37/100  
1099/1099 - 121s - loss: 648.7452 - mse: 648.7452 - mae: 18.6271 - val\_loss: 674.8153 - val\_mse: 674.8153 - val\_mae: 19.1966 - 121s/epoch - 110ms/step  
Epoch 38/100  
1099/1099 - 121s - loss: 640.9825 - mse: 640.9825 - mae: 18.4969 - val\_loss: 658.1334 - val\_mse: 658.1334 - val\_mae: 18.6170 - 121s/epoch - 110ms/step  
Epoch 39/100  
1099/1099 - 121s - loss: 633.1066 - mse: 633.1066 - mae: 18.3444 - val\_loss: 658.5206 - val\_mse: 658.5206 - val\_mae: 18.7112 - 121s/epoch - 110ms/step  
Epoch 40/100  
1099/1099 - 122s - loss: 631.8412 - mse: 631.8412 - mae: 18.2974 - val\_loss: 659.5479 - val\_mse: 659.5479 - val\_mae: 18.7993 - 122s/epoch - 111ms/step  
Epoch 41/100  
1099/1099 - 122s - loss: 625.6940 - mse: 625.6940 - mae: 18.1844 - val\_loss: 653.7411 - val\_mse: 653.7411 - val\_mae: 18.6295 - 122s/epoch - 111ms/step  
Epoch 42/100  
1099/1099 - 122s - loss: 620.2148 - mse: 620.2148 - mae: 18.0751 - val\_loss: 649.9553 - val\_mse: 649.9553 - val\_mae: 18.5688 - 122s/epoch - 111ms/step  
Epoch 43/100  
1099/1099 - 122s - loss: 617.1749 - mse: 617.1749 - mae: 18.0130 - val\_loss: 645.7285 - val\_mse: 645.7285 - val\_mae: 18.4121 - 122s/epoch - 111ms/step  
Epoch 44/100  
1099/1099 - 121s - loss: 612.3329 - mse: 612.3329 - mae: 17.9054 - val\_loss: 655.6520 - val\_mse: 655.6520 - val\_mae: 18.6384 - 121s/epoch - 110ms/step  
Epoch 45/100  
1099/1099 - 121s - loss: 607.7928 - mse: 607.7928 - mae: 17.8338 - val\_loss: 646.2257 - val\_mse: 646.2257 - val\_mae: 18.5417 - 121s/epoch - 110ms/step  
Epoch 46/100  
1099/1099 - 121s - loss: 603.7157 - mse: 603.7157 - mae: 17.7322 - val\_loss:

s: 640.2560 - val\_mse: 640.2560 - val\_mae: 18.3809 - 121s/epoch - 110ms/st  
ep  
Epoch 47/100  
1099/1099 - 121s - loss: 600.2142 - mse: 600.2142 - mae: 17.6627 - val\_los  
s: 641.7457 - val\_mse: 641.7457 - val\_mae: 18.3901 - 121s/epoch - 110ms/st  
ep  
Epoch 48/100  
1099/1099 - 121s - loss: 597.5131 - mse: 597.5131 - mae: 17.5989 - val\_los  
s: 628.4609 - val\_mse: 628.4609 - val\_mae: 18.0033 - 121s/epoch - 110ms/st  
ep  
Epoch 49/100  
1099/1099 - 121s - loss: 595.0883 - mse: 595.0883 - mae: 17.5353 - val\_los  
s: 640.0764 - val\_mse: 640.0764 - val\_mae: 18.2441 - 121s/epoch - 110ms/st  
ep  
Epoch 50/100  
1099/1099 - 121s - loss: 590.9971 - mse: 590.9971 - mae: 17.4906 - val\_los  
s: 624.3300 - val\_mse: 624.3300 - val\_mae: 17.8844 - 121s/epoch - 110ms/st  
ep  
Epoch 51/100  
1099/1099 - 121s - loss: 586.5233 - mse: 586.5233 - mae: 17.3946 - val\_los  
s: 653.5497 - val\_mse: 653.5497 - val\_mae: 18.7292 - 121s/epoch - 110ms/st  
ep  
Epoch 52/100  
1099/1099 - 121s - loss: 585.9349 - mse: 585.9349 - mae: 17.3679 - val\_los  
s: 628.2252 - val\_mse: 628.2252 - val\_mae: 18.0246 - 121s/epoch - 110ms/st  
ep  
Epoch 53/100  
1099/1099 - 121s - loss: 580.9141 - mse: 580.9141 - mae: 17.2732 - val\_los  
s: 633.3488 - val\_mse: 633.3488 - val\_mae: 18.2113 - 121s/epoch - 110ms/st  
ep  
Epoch 54/100  
1099/1099 - 121s - loss: 574.4342 - mse: 574.4342 - mae: 17.1683 - val\_los  
s: 617.6712 - val\_mse: 617.6712 - val\_mae: 17.8016 - 121s/epoch - 110ms/st  
ep  
Epoch 55/100  
1099/1099 - 122s - loss: 573.2401 - mse: 573.2401 - mae: 17.1323 - val\_los  
s: 631.8395 - val\_mse: 631.8395 - val\_mae: 18.2973 - 122s/epoch - 111ms/st  
ep  
Epoch 56/100  
1099/1099 - 121s - loss: 571.5531 - mse: 571.5531 - mae: 17.0849 - val\_los  
s: 616.7543 - val\_mse: 616.7543 - val\_mae: 17.8544 - 121s/epoch - 110ms/st  
ep  
Epoch 57/100  
1099/1099 - 121s - loss: 566.0838 - mse: 566.0838 - mae: 17.0144 - val\_los  
s: 614.1036 - val\_mse: 614.1036 - val\_mae: 17.7729 - 121s/epoch - 111ms/st  
ep  
Epoch 58/100  
1099/1099 - 123s - loss: 563.6394 - mse: 563.6394 - mae: 16.9545 - val\_los  
s: 626.4923 - val\_mse: 626.4923 - val\_mae: 18.1013 - 123s/epoch - 112ms/st  
ep  
Epoch 59/100  
1099/1099 - 122s - loss: 561.5654 - mse: 561.5654 - mae: 16.9007 - val\_los  
s: 617.6746 - val\_mse: 617.6746 - val\_mae: 17.8576 - 122s/epoch - 111ms/st  
ep  
Epoch 60/100  
1099/1099 - 122s - loss: 555.6356 - mse: 555.6356 - mae: 16.8028 - val\_los  
s: 613.5953 - val\_mse: 613.5953 - val\_mae: 17.6379 - 122s/epoch - 111ms/st  
ep  
Epoch 61/100  
1099/1099 - 122s - loss: 550.8956 - mse: 550.8956 - mae: 16.7369 - val\_los  
s: 608.9308 - val\_mse: 608.9308 - val\_mae: 17.6155 - 122s/epoch - 111ms/st



ep  
Epoch 62/100  
1099/1099 - 122s - loss: 548.1346 - mse: 548.1346 - mae: 16.6625 - val\_loss: 622.7263 - val\_mse: 622.7263 - val\_mae: 17.8070 - 122s/epoch - 111ms/st  
ep  
Epoch 63/100  
1099/1099 - 122s - loss: 547.2802 - mse: 547.2802 - mae: 16.6344 - val\_loss: 603.6377 - val\_mse: 603.6377 - val\_mae: 17.5601 - 122s/epoch - 111ms/st  
ep  
Epoch 64/100  
1099/1099 - 121s - loss: 542.8777 - mse: 542.8777 - mae: 16.5812 - val\_loss: 606.0582 - val\_mse: 606.0582 - val\_mae: 17.6826 - 121s/epoch - 110ms/st  
ep  
Epoch 65/100  
1099/1099 - 122s - loss: 542.0021 - mse: 542.0021 - mae: 16.5169 - val\_loss: 605.0950 - val\_mse: 605.0950 - val\_mae: 17.6095 - 122s/epoch - 111ms/st  
ep  
Epoch 66/100  
1099/1099 - 122s - loss: 535.1974 - mse: 535.1974 - mae: 16.4282 - val\_loss: 605.7291 - val\_mse: 605.7291 - val\_mae: 17.6318 - 122s/epoch - 111ms/st  
ep  
Epoch 67/100  
1099/1099 - 122s - loss: 530.2233 - mse: 530.2233 - mae: 16.3167 - val\_loss: 613.4329 - val\_mse: 613.4329 - val\_mae: 17.5631 - 122s/epoch - 111ms/st  
ep  
Epoch 68/100  
1099/1099 - 122s - loss: 528.3396 - mse: 528.3396 - mae: 16.2701 - val\_loss: 593.2491 - val\_mse: 593.2491 - val\_mae: 17.3052 - 122s/epoch - 111ms/st  
ep  
Epoch 69/100  
1099/1099 - 122s - loss: 526.9913 - mse: 526.9913 - mae: 16.2612 - val\_loss: 610.8624 - val\_mse: 610.8624 - val\_mae: 17.8334 - 122s/epoch - 111ms/st  
ep  
Epoch 70/100  
1099/1099 - 122s - loss: 523.3195 - mse: 523.3195 - mae: 16.1718 - val\_loss: 618.7324 - val\_mse: 618.7324 - val\_mae: 17.9462 - 122s/epoch - 111ms/st  
ep  
Epoch 71/100  
1099/1099 - 122s - loss: 522.5530 - mse: 522.5530 - mae: 16.1413 - val\_loss: 596.7200 - val\_mse: 596.7200 - val\_mae: 17.3458 - 122s/epoch - 111ms/st  
ep  
Epoch 72/100  
1099/1099 - 122s - loss: 519.4672 - mse: 519.4672 - mae: 16.0874 - val\_loss: 607.6735 - val\_mse: 607.6735 - val\_mae: 17.6976 - 122s/epoch - 111ms/st  
ep  
Epoch 73/100  
1099/1099 - 122s - loss: 514.8099 - mse: 514.8099 - mae: 16.0098 - val\_loss: 597.7845 - val\_mse: 597.7845 - val\_mae: 17.3357 - 122s/epoch - 111ms/st  
ep  
Epoch 74/100  
1099/1099 - 123s - loss: 514.2049 - mse: 514.2049 - mae: 15.9921 - val\_loss: 591.3371 - val\_mse: 591.3371 - val\_mae: 17.2924 - 123s/epoch - 112ms/st  
ep  
Epoch 75/100  
1099/1099 - 122s - loss: 507.8681 - mse: 507.8681 - mae: 15.8505 - val\_loss: 579.5782 - val\_mse: 579.5782 - val\_mae: 17.0090 - 122s/epoch - 111ms/st  
ep  
Epoch 76/100  
1099/1099 - 122s - loss: 504.8878 - mse: 504.8878 - mae: 15.8264 - val\_loss: 586.2807 - val\_mse: 586.2807 - val\_mae: 17.3018 - 122s/epoch - 111ms/st  
ep

Epoch 77/100

1099/1099 - 123s - loss: 503.7386 - mse: 503.7386 - mae: 15.7930 - val\_loss: 579.8618 - val\_mse: 579.8618 - val\_mae: 17.0173 - 123s/epoch - 112ms/step

Epoch 78/100

1099/1099 - 123s - loss: 499.5308 - mse: 499.5308 - mae: 15.7014 - val\_loss: 575.7191 - val\_mse: 575.7191 - val\_mae: 17.0380 - 123s/epoch - 112ms/step

Epoch 79/100

1099/1099 - 122s - loss: 497.5346 - mse: 497.5346 - mae: 15.6579 - val\_loss: 574.1452 - val\_mse: 574.1452 - val\_mae: 16.9503 - 122s/epoch - 111ms/step

Epoch 80/100

1099/1099 - 127s - loss: 497.2852 - mse: 497.2852 - mae: 15.6261 - val\_loss: 585.7650 - val\_mse: 585.7650 - val\_mae: 17.2284 - 127s/epoch - 115ms/step

Epoch 81/100

1099/1099 - 124s - loss: 492.7578 - mse: 492.7578 - mae: 15.5717 - val\_loss: 576.2000 - val\_mse: 576.2000 - val\_mae: 16.9693 - 124s/epoch - 113ms/step

Epoch 82/100

1099/1099 - 122s - loss: 488.1373 - mse: 488.1373 - mae: 15.4511 - val\_loss: 569.6962 - val\_mse: 569.6962 - val\_mae: 16.8125 - 122s/epoch - 111ms/step

Epoch 83/100

1099/1099 - 123s - loss: 484.6519 - mse: 484.6519 - mae: 15.4100 - val\_loss: 558.9392 - val\_mse: 558.9392 - val\_mae: 16.5746 - 123s/epoch - 112ms/step

Epoch 84/100

1099/1099 - 121s - loss: 482.0196 - mse: 482.0196 - mae: 15.3273 - val\_loss: 567.9360 - val\_mse: 567.9360 - val\_mae: 16.8154 - 121s/epoch - 111ms/step

Epoch 85/100

1099/1099 - 122s - loss: 476.5275 - mse: 476.5275 - mae: 15.2442 - val\_loss: 565.0546 - val\_mse: 565.0546 - val\_mae: 16.7830 - 122s/epoch - 111ms/step

Epoch 86/100

1099/1099 - 122s - loss: 471.9028 - mse: 471.9028 - mae: 15.1646 - val\_loss: 564.2339 - val\_mse: 564.2339 - val\_mae: 16.6206 - 122s/epoch - 111ms/step

Epoch 87/100

1099/1099 - 121s - loss: 468.1417 - mse: 468.1417 - mae: 15.0976 - val\_loss: 547.9575 - val\_mse: 547.9575 - val\_mae: 16.5050 - 121s/epoch - 110ms/step

Epoch 88/100

1099/1099 - 121s - loss: 465.9435 - mse: 465.9435 - mae: 15.0067 - val\_loss: 547.6498 - val\_mse: 547.6498 - val\_mae: 16.2576 - 121s/epoch - 110ms/step

Epoch 89/100

1099/1099 - 122s - loss: 461.0446 - mse: 461.0446 - mae: 14.9261 - val\_loss: 556.9908 - val\_mse: 556.9908 - val\_mae: 16.5421 - 122s/epoch - 111ms/step

Epoch 90/100

1099/1099 - 121s - loss: 456.4438 - mse: 456.4438 - mae: 14.8531 - val\_loss: 543.2483 - val\_mse: 543.2483 - val\_mae: 16.2131 - 121s/epoch - 110ms/step

Epoch 91/100

1099/1099 - 121s - loss: 451.4556 - mse: 451.4556 - mae: 14.7294 - val\_loss: 535.2781 - val\_mse: 535.2781 - val\_mae: 16.0903 - 121s/epoch - 110ms/step

Epoch 92/100

1099/1099 - 124s - loss: 448.4187 - mse: 448.4187 - mae: 14.6648 - val\_loss: 542.1154 - val\_mse: 542.1154 - val\_mae: 16.3163 - 124s/epoch - 113ms/step  
 Epoch 93/100  
 1099/1099 - 121s - loss: 443.9200 - mse: 443.9200 - mae: 14.5633 - val\_loss: 525.2914 - val\_mse: 525.2914 - val\_mae: 15.9391 - 121s/epoch - 110ms/step  
 Epoch 94/100  
 1099/1099 - 121s - loss: 443.4789 - mse: 443.4789 - mae: 14.5848 - val\_loss: 525.1678 - val\_mse: 525.1678 - val\_mae: 15.8893 - 121s/epoch - 110ms/step  
 Epoch 95/100  
 1099/1099 - 122s - loss: 438.2408 - mse: 438.2408 - mae: 14.4632 - val\_loss: 521.5791 - val\_mse: 521.5791 - val\_mae: 15.8110 - 122s/epoch - 111ms/step  
 Epoch 96/100  
 1099/1099 - 121s - loss: 431.0370 - mse: 431.0370 - mae: 14.3596 - val\_loss: 538.4924 - val\_mse: 538.4924 - val\_mae: 15.9671 - 121s/epoch - 110ms/step  
 Epoch 97/100  
 1099/1099 - 122s - loss: 430.9967 - mse: 430.9967 - mae: 14.3438 - val\_loss: 530.3422 - val\_mse: 530.3422 - val\_mae: 15.8602 - 122s/epoch - 111ms/step  
 Epoch 98/100  
 1099/1099 - 121s - loss: 427.3611 - mse: 427.3611 - mae: 14.2505 - val\_loss: 541.4880 - val\_mse: 541.4880 - val\_mae: 16.1644 - 121s/epoch - 110ms/step  
 Epoch 99/100  
 1099/1099 - 121s - loss: 426.4020 - mse: 426.4020 - mae: 14.2106 - val\_loss: 511.3421 - val\_mse: 511.3421 - val\_mae: 15.5762 - 121s/epoch - 110ms/step  
 Epoch 100/100  
 1099/1099 - 121s - loss: 420.5662 - mse: 420.5662 - mae: 14.1008 - val\_loss: 533.2664 - val\_mse: 533.2664 - val\_mae: 16.0922 - 121s/epoch - 110ms/step

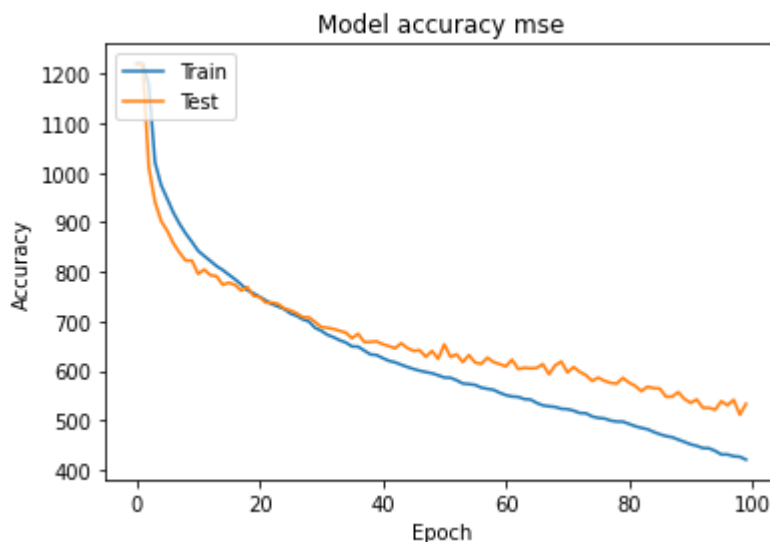

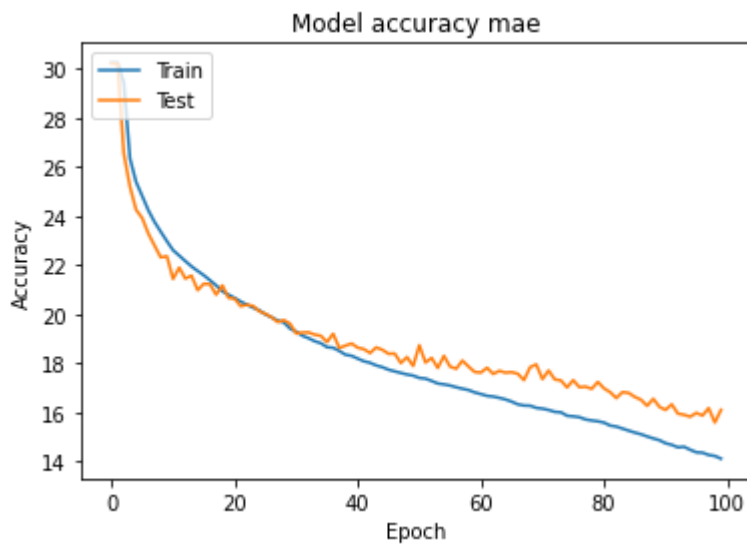

MUSIC MSE: 1375.568

MUSIC MAE: 21.1539

Out of range MUSIC prediction: 0

In [ ]:

```
magnitude = pd.read_csv('/content/drive/MyDrive/train_magnitude.csv', header=None).to_numpy()
output_data = pd.read_csv('/content/drive/MyDrive/train_outputs.csv', header=None).to_numpy()
phase = pd.read_csv('/content/drive/MyDrive/train_phase.csv', header=None).to_numpy()

data = load_data_cnn(phase, magnitude, output_data, antenna_num)
phase_data = data[0]
magnitude_data = data[1]
output_data = data[2]

data_split = split_test_train(phase_data, magnitude_data, output_data, 0.4)
x_train_magnitude = data_split[0]
x_test_magnitude = data_split[1]
x_train_phase = data_split[2]
x_test_phase = data_split[3]
y_train = data_split[4][:,0:2]
y_test = data_split[5][:,0:2]
```

In [ ]:

```
antenna_num = 2
filters=(64,32,16)
lr = 0.001
epochs = 100
opt = Adam(learning_rate=lr)
regress=False

phase = create_2d_cnn(100, 4, 1, filters, regress, "relu")
magnitude = create_2d_cnn(100, 4, 1, filters, regress, "relu")

model = combine_models(phase, magnitude, (10,))
model.compile(loss='mean_squared_error', optimizer=opt, metrics=['mse', 'mae'])

history = model.fit(
x=[x_train_magnitude, x_train_phase], y=y_train,
  validation_data=(x_test_magnitude, x_test_phase), y_test),
  epochs=epochs, batch_size=64, verbose=2
)

display_graphs(history)

comparison = MUSIC_metrics(data_split[5])
print("MUSIC MSE: ", comparison[1])
print("MUSIC MAE: ", comparison[0])
print("Out of range MUSIC prediction: ", len(comparison[2]))

index = comparison[2][0]

print("Music example preiction for MUSIC nan")
print("Actual: [", data_split[5][index][0], " ", data_split[5][index][1], "]" )
predictions = model.predict([x_test_magnitude, x_test_phase])
print("Prediction: ", predictions[index])
```

Epoch 1/100

1099/1099 - 164s - loss: 920.7108 - mse: 920.7108 - mae: 23.8552 - val\_loss: 801.9182 - val\_mse: 801.9182 - val\_mae: 20.7510 - 164s/epoch - 149ms/step

Epoch 2/100

1099/1099 - 161s - loss: 807.4346 - mse: 807.4346 - mae: 21.2674 - val\_loss: 767.1603 - val\_mse: 767.1603 - val\_mae: 20.5348 - 161s/epoch - 147ms/step

Epoch 3/100

1099/1099 - 164s - loss: 779.0401 - mse: 779.0401 - mae: 20.6472 - val\_loss: 744.7557 - val\_mse: 744.7557 - val\_mae: 19.2824 - 164s/epoch - 149ms/step

Epoch 4/100

1099/1099 - 163s - loss: 765.5746 - mse: 765.5746 - mae: 20.2909 - val\_loss: 742.4951 - val\_mse: 742.4951 - val\_mae: 19.7193 - 163s/epoch - 149ms/step

Epoch 5/100

1099/1099 - 163s - loss: 752.1844 - mse: 752.1844 - mae: 19.9550 - val\_loss: 703.4613 - val\_mse: 703.4613 - val\_mae: 18.6921 - 163s/epoch - 148ms/step

Epoch 6/100

1099/1099 - 161s - loss: 733.3254 - mse: 733.3254 - mae: 19.5963 - val\_loss: 702.7101 - val\_mse: 702.7101 - val\_mae: 18.1432 - 161s/epoch - 147ms/step

Epoch 7/100

1099/1099 - 163s - loss: 706.0722 - mse: 706.0722 - mae: 19.0691 - val\_loss: 616.2882 - val\_mse: 616.2882 - val\_mae: 16.6075 - 163s/epoch - 148ms/step

Epoch 8/100

1099/1099 - 162s - loss: 668.6118 - mse: 668.6118 - mae: 18.2904 - val\_loss: 625.1597 - val\_mse: 625.1597 - val\_mae: 18.2909 - 162s/epoch - 148ms/step

Epoch 9/100

1099/1099 - 163s - loss: 639.4239 - mse: 639.4239 - mae: 17.6867 - val\_loss: 589.1785 - val\_mse: 589.1785 - val\_mae: 16.8018 - 163s/epoch - 149ms/step

Epoch 10/100

1099/1099 - 164s - loss: 615.5593 - mse: 615.5593 - mae: 17.1944 - val\_loss: 556.8749 - val\_mse: 556.8749 - val\_mae: 15.3737 - 164s/epoch - 149ms/step

Epoch 11/100

1099/1099 - 164s - loss: 593.8275 - mse: 593.8275 - mae: 16.7709 - val\_loss: 535.6553 - val\_mse: 535.6553 - val\_mae: 15.0668 - 164s/epoch - 149ms/step

Epoch 12/100

1099/1099 - 165s - loss: 579.2672 - mse: 579.2672 - mae: 16.4181 - val\_loss: 553.1277 - val\_mse: 553.1277 - val\_mae: 15.7012 - 165s/epoch - 150ms/step

Epoch 13/100

1099/1099 - 164s - loss: 563.6663 - mse: 563.6663 - mae: 16.0879 - val\_loss: 440.3730 - val\_mse: 440.3730 - val\_mae: 12.6585 - 164s/epoch - 149ms/step

Epoch 14/100

1099/1099 - 163s - loss: 547.3789 - mse: 547.3789 - mae: 15.8239 - val\_loss: 416.5207 - val\_mse: 416.5207 - val\_mae: 12.2695 - 163s/epoch - 148ms/step

Epoch 15/100

1099/1099 - 162s - loss: 530.1920 - mse: 530.1920 - mae: 15.4074 - val\_loss: 406.0198 - val\_mse: 406.0198 - val\_mae: 12.1891 - 162s/epoch - 148ms/step

Epoch 16/100

1099/1099 - 163s - loss: 512.9755 - mse: 512.9755 - mae: 14.9986 - val\_loss: 391.6367 - val\_mse: 391.6367 - val\_mae: 12.0705 - 163s/epoch - 148ms/step  
Epoch 17/100  
1099/1099 - 163s - loss: 502.7098 - mse: 502.7098 - mae: 14.7528 - val\_loss: 424.7804 - val\_mse: 424.7804 - val\_mae: 12.9531 - 163s/epoch - 149ms/step  
Epoch 18/100  
1099/1099 - 164s - loss: 490.7014 - mse: 490.7014 - mae: 14.5407 - val\_loss: 352.8169 - val\_mse: 352.8169 - val\_mae: 10.8312 - 164s/epoch - 149ms/step  
Epoch 19/100  
1099/1099 - 164s - loss: 476.6518 - mse: 476.6518 - mae: 14.1988 - val\_loss: 389.0634 - val\_mse: 389.0634 - val\_mae: 11.8584 - 164s/epoch - 149ms/step  
Epoch 20/100  
1099/1099 - 163s - loss: 466.1253 - mse: 466.1253 - mae: 13.9437 - val\_loss: 349.4915 - val\_mse: 349.4915 - val\_mae: 11.3449 - 163s/epoch - 149ms/step  
Epoch 21/100  
1099/1099 - 164s - loss: 458.4405 - mse: 458.4405 - mae: 13.8121 - val\_loss: 397.5102 - val\_mse: 397.5102 - val\_mae: 12.4963 - 164s/epoch - 149ms/step  
Epoch 22/100  
1099/1099 - 163s - loss: 450.7635 - mse: 450.7635 - mae: 13.6161 - val\_loss: 353.1011 - val\_mse: 353.1011 - val\_mae: 11.1148 - 163s/epoch - 149ms/step  
Epoch 23/100  
1099/1099 - 163s - loss: 442.4507 - mse: 442.4507 - mae: 13.4679 - val\_loss: 351.2157 - val\_mse: 351.2157 - val\_mae: 10.7698 - 163s/epoch - 148ms/step  
Epoch 24/100  
1099/1099 - 162s - loss: 438.6650 - mse: 438.6650 - mae: 13.3779 - val\_loss: 414.9632 - val\_mse: 414.9632 - val\_mae: 12.0963 - 162s/epoch - 148ms/step  
Epoch 25/100  
1099/1099 - 164s - loss: 431.5531 - mse: 431.5531 - mae: 13.2395 - val\_loss: 331.5049 - val\_mse: 331.5049 - val\_mae: 10.6789 - 164s/epoch - 149ms/step  
Epoch 26/100  
1099/1099 - 162s - loss: 425.6254 - mse: 425.6254 - mae: 13.1148 - val\_loss: 341.9999 - val\_mse: 341.9999 - val\_mae: 10.0349 - 162s/epoch - 148ms/step  
Epoch 27/100  
1099/1099 - 163s - loss: 417.8536 - mse: 417.8536 - mae: 12.9434 - val\_loss: 356.4768 - val\_mse: 356.4768 - val\_mae: 10.0338 - 163s/epoch - 148ms/step  
Epoch 28/100  
1099/1099 - 164s - loss: 408.4824 - mse: 408.4824 - mae: 12.7573 - val\_loss: 320.3737 - val\_mse: 320.3737 - val\_mae: 9.9307 - 164s/epoch - 149ms/step  
Epoch 29/100  
1099/1099 - 162s - loss: 410.2840 - mse: 410.2840 - mae: 12.7627 - val\_loss: 298.0253 - val\_mse: 298.0253 - val\_mae: 9.7342 - 162s/epoch - 148ms/step  
Epoch 30/100  
1099/1099 - 162s - loss: 399.2497 - mse: 399.2497 - mae: 12.5633 - val\_loss: 282.9524 - val\_mse: 282.9524 - val\_mae: 9.5399 - 162s/epoch - 148ms/step  
Epoch 31/100  
1099/1099 - 162s - loss: 395.7394 - mse: 395.7394 - mae: 12.4685 - val\_loss:

s: 312.0878 - val\_mse: 312.0878 - val\_mae: 9.6146 - 162s/epoch - 147ms/step  
Epoch 32/100  
1099/1099 - 163s - loss: 394.1809 - mse: 394.1809 - mae: 12.4303 - val\_loss: 313.2788 - val\_mse: 313.2788 - val\_mae: 10.3901 - 163s/epoch - 148ms/step  
Epoch 33/100  
1099/1099 - 163s - loss: 388.3496 - mse: 388.3496 - mae: 12.3050 - val\_loss: 296.3410 - val\_mse: 296.3410 - val\_mae: 9.8605 - 163s/epoch - 148ms/step  
Epoch 34/100  
1099/1099 - 164s - loss: 388.7788 - mse: 388.7788 - mae: 12.2623 - val\_loss: 383.7821 - val\_mse: 383.7821 - val\_mae: 10.9166 - 164s/epoch - 149ms/step  
Epoch 35/100  
1099/1099 - 162s - loss: 382.9593 - mse: 382.9593 - mae: 12.1445 - val\_loss: 292.2452 - val\_mse: 292.2452 - val\_mae: 9.0680 - 162s/epoch - 147ms/step  
Epoch 36/100  
1099/1099 - 162s - loss: 378.6884 - mse: 378.6884 - mae: 12.0181 - val\_loss: 299.6748 - val\_mse: 299.6748 - val\_mae: 9.5269 - 162s/epoch - 148ms/step  
Epoch 37/100  
1099/1099 - 163s - loss: 375.3960 - mse: 375.3960 - mae: 11.9641 - val\_loss: 272.0657 - val\_mse: 272.0657 - val\_mae: 9.6096 - 163s/epoch - 148ms/step  
Epoch 38/100  
1099/1099 - 163s - loss: 373.4230 - mse: 373.4230 - mae: 11.9018 - val\_loss: 265.1270 - val\_mse: 265.1270 - val\_mae: 8.9132 - 163s/epoch - 148ms/step  
Epoch 39/100  
1099/1099 - 164s - loss: 368.5201 - mse: 368.5201 - mae: 11.8158 - val\_loss: 265.0399 - val\_mse: 265.0399 - val\_mae: 8.5125 - 164s/epoch - 149ms/step  
Epoch 40/100  
1099/1099 - 164s - loss: 366.8125 - mse: 366.8125 - mae: 11.7695 - val\_loss: 263.2526 - val\_mse: 263.2526 - val\_mae: 8.9788 - 164s/epoch - 149ms/step  
Epoch 41/100  
1099/1099 - 163s - loss: 361.7670 - mse: 361.7670 - mae: 11.6521 - val\_loss: 252.5164 - val\_mse: 252.5164 - val\_mae: 8.7756 - 163s/epoch - 148ms/step  
Epoch 42/100  
1099/1099 - 162s - loss: 357.0591 - mse: 357.0591 - mae: 11.5619 - val\_loss: 283.5135 - val\_mse: 283.5135 - val\_mae: 9.5355 - 162s/epoch - 148ms/step  
Epoch 43/100  
1099/1099 - 163s - loss: 354.8132 - mse: 354.8132 - mae: 11.5199 - val\_loss: 308.8343 - val\_mse: 308.8343 - val\_mae: 9.5698 - 163s/epoch - 149ms/step  
Epoch 44/100  
1099/1099 - 163s - loss: 354.6314 - mse: 354.6314 - mae: 11.4642 - val\_loss: 273.9554 - val\_mse: 273.9554 - val\_mae: 8.5353 - 163s/epoch - 148ms/step  
Epoch 45/100  
1099/1099 - 162s - loss: 354.6002 - mse: 354.6002 - mae: 11.4590 - val\_loss: 276.5737 - val\_mse: 276.5737 - val\_mae: 8.5838 - 162s/epoch - 148ms/step  
Epoch 46/100  
1099/1099 - 163s - loss: 352.7380 - mse: 352.7380 - mae: 11.4166 - val\_loss: 215.4649 - val\_mse: 215.4649 - val\_mae: 7.7511 - 163s/epoch - 148ms/step



p  
Epoch 47/100  
1099/1099 - 163s - loss: 346.7590 - mse: 346.7590 - mae: 11.3027 - val\_loss: 244.5855 - val\_mse: 244.5855 - val\_mae: 8.4640 - 163s/epoch - 148ms/step  
p  
Epoch 48/100  
1099/1099 - 163s - loss: 342.8677 - mse: 342.8677 - mae: 11.2179 - val\_loss: 283.7913 - val\_mse: 283.7913 - val\_mae: 8.2732 - 163s/epoch - 148ms/step  
p  
Epoch 49/100  
1099/1099 - 163s - loss: 345.5799 - mse: 345.5799 - mae: 11.2659 - val\_loss: 256.8016 - val\_mse: 256.8016 - val\_mae: 8.4296 - 163s/epoch - 148ms/step  
p  
Epoch 50/100  
1099/1099 - 161s - loss: 343.4594 - mse: 343.4594 - mae: 11.1997 - val\_loss: 230.7967 - val\_mse: 230.7967 - val\_mae: 8.2711 - 161s/epoch - 147ms/step  
p  
Epoch 51/100  
1099/1099 - 163s - loss: 339.4018 - mse: 339.4018 - mae: 11.0891 - val\_loss: 296.1174 - val\_mse: 296.1174 - val\_mae: 8.9256 - 163s/epoch - 148ms/step  
p  
Epoch 52/100  
1099/1099 - 162s - loss: 341.2154 - mse: 341.2154 - mae: 11.1133 - val\_loss: 226.6825 - val\_mse: 226.6825 - val\_mae: 7.9737 - 162s/epoch - 148ms/step  
p  
Epoch 53/100  
1099/1099 - 162s - loss: 334.5053 - mse: 334.5053 - mae: 11.0198 - val\_loss: 248.3322 - val\_mse: 248.3322 - val\_mae: 9.0878 - 162s/epoch - 148ms/step  
p  
Epoch 54/100  
1099/1099 - 163s - loss: 334.5648 - mse: 334.5648 - mae: 11.0138 - val\_loss: 241.2182 - val\_mse: 241.2182 - val\_mae: 7.7438 - 163s/epoch - 149ms/step  
p  
Epoch 55/100  
1099/1099 - 161s - loss: 331.7254 - mse: 331.7254 - mae: 10.9583 - val\_loss: 267.2649 - val\_mse: 267.2649 - val\_mae: 8.3187 - 161s/epoch - 147ms/step  
p  
Epoch 56/100  
1099/1099 - 162s - loss: 331.3712 - mse: 331.3712 - mae: 10.9091 - val\_loss: 227.7070 - val\_mse: 227.7070 - val\_mae: 7.6607 - 162s/epoch - 148ms/step  
p  
Epoch 57/100  
1099/1099 - 162s - loss: 332.7068 - mse: 332.7068 - mae: 10.9037 - val\_loss: 238.0725 - val\_mse: 238.0725 - val\_mae: 8.1838 - 162s/epoch - 148ms/step  
p  
Epoch 58/100  
1099/1099 - 163s - loss: 327.7724 - mse: 327.7724 - mae: 10.8286 - val\_loss: 291.9584 - val\_mse: 291.9584 - val\_mae: 8.5535 - 163s/epoch - 148ms/step  
p  
Epoch 59/100  
1099/1099 - 163s - loss: 327.5980 - mse: 327.5980 - mae: 10.8307 - val\_loss: 265.2464 - val\_mse: 265.2464 - val\_mae: 8.1621 - 163s/epoch - 148ms/step  
p  
Epoch 60/100  
1099/1099 - 163s - loss: 326.4719 - mse: 326.4719 - mae: 10.8026 - val\_loss: 245.2028 - val\_mse: 245.2028 - val\_mae: 7.8317 - 163s/epoch - 148ms/step  
p  
Epoch 61/100  
1099/1099 - 163s - loss: 319.6705 - mse: 319.6705 - mae: 10.7143 - val\_loss: 286.7401 - val\_mse: 286.7401 - val\_mae: 8.5970 - 163s/epoch - 149ms/step  
p

Epoch 62/100

1099/1099 - 164s - loss: 321.9509 - mse: 321.9509 - mae: 10.7109 - val\_loss: 227.0987 - val\_mse: 227.0987 - val\_mae: 7.9656 - 164s/epoch - 149ms/step

Epoch 63/100

1099/1099 - 163s - loss: 317.7670 - mse: 317.7670 - mae: 10.6475 - val\_loss: 271.6366 - val\_mse: 271.6366 - val\_mae: 8.1127 - 163s/epoch - 148ms/step

Epoch 64/100

1099/1099 - 164s - loss: 326.8047 - mse: 326.8047 - mae: 10.7487 - val\_loss: 263.0584 - val\_mse: 263.0584 - val\_mae: 8.2005 - 164s/epoch - 150ms/step

Epoch 65/100

1099/1099 - 163s - loss: 314.6723 - mse: 314.6723 - mae: 10.5953 - val\_loss: 269.8747 - val\_mse: 269.8747 - val\_mae: 8.5359 - 163s/epoch - 148ms/step

Epoch 66/100

1099/1099 - 164s - loss: 320.4204 - mse: 320.4204 - mae: 10.6837 - val\_loss: 205.7747 - val\_mse: 205.7747 - val\_mae: 7.6560 - 164s/epoch - 149ms/step

Epoch 67/100

1099/1099 - 163s - loss: 318.3994 - mse: 318.3994 - mae: 10.6079 - val\_loss: 274.7663 - val\_mse: 274.7663 - val\_mae: 8.5036 - 163s/epoch - 149ms/step

Epoch 68/100

1099/1099 - 163s - loss: 317.4967 - mse: 317.4967 - mae: 10.6048 - val\_loss: 238.2967 - val\_mse: 238.2967 - val\_mae: 8.4767 - 163s/epoch - 148ms/step

Epoch 69/100

1099/1099 - 163s - loss: 315.1361 - mse: 315.1361 - mae: 10.5624 - val\_loss: 231.7694 - val\_mse: 231.7694 - val\_mae: 7.4939 - 163s/epoch - 148ms/step

Epoch 70/100

1099/1099 - 164s - loss: 315.8132 - mse: 315.8132 - mae: 10.6329 - val\_loss: 238.2920 - val\_mse: 238.2920 - val\_mae: 7.9684 - 164s/epoch - 149ms/step

Epoch 71/100

1099/1099 - 162s - loss: 312.6020 - mse: 312.6020 - mae: 10.5107 - val\_loss: 207.5775 - val\_mse: 207.5775 - val\_mae: 7.5054 - 162s/epoch - 147ms/step

Epoch 72/100

1099/1099 - 162s - loss: 311.7339 - mse: 311.7339 - mae: 10.4684 - val\_loss: 205.9739 - val\_mse: 205.9739 - val\_mae: 7.8690 - 162s/epoch - 148ms/step

Epoch 73/100

1099/1099 - 161s - loss: 308.2644 - mse: 308.2644 - mae: 10.4213 - val\_loss: 237.8414 - val\_mse: 237.8414 - val\_mae: 7.8692 - 161s/epoch - 147ms/step

Epoch 74/100

1099/1099 - 161s - loss: 311.3011 - mse: 311.3011 - mae: 10.4331 - val\_loss: 259.9254 - val\_mse: 259.9254 - val\_mae: 7.9182 - 161s/epoch - 147ms/step

Epoch 75/100

1099/1099 - 163s - loss: 306.0712 - mse: 306.0712 - mae: 10.3706 - val\_loss: 277.6824 - val\_mse: 277.6824 - val\_mae: 8.0656 - 163s/epoch - 148ms/step

Epoch 76/100

1099/1099 - 163s - loss: 305.7158 - mse: 305.7158 - mae: 10.3656 - val\_loss: 231.8150 - val\_mse: 231.8150 - val\_mae: 7.7759 - 163s/epoch - 148ms/step

Epoch 77/100

1099/1099 - 162s - loss: 307.7103 - mse: 307.7103 - mae: 10.3595 - val\_loss: 260.4654 - val\_mse: 260.4654 - val\_mae: 7.8218 - 162s/epoch - 148ms/step  
Epoch 78/100  
1099/1099 - 162s - loss: 304.6907 - mse: 304.6907 - mae: 10.3510 - val\_loss: 300.0749 - val\_mse: 300.0749 - val\_mae: 8.6715 - 162s/epoch - 147ms/step  
Epoch 79/100  
1099/1099 - 161s - loss: 302.2947 - mse: 302.2947 - mae: 10.2701 - val\_loss: 227.0569 - val\_mse: 227.0569 - val\_mae: 8.0193 - 161s/epoch - 147ms/step  
Epoch 80/100  
1099/1099 - 163s - loss: 305.8715 - mse: 305.8715 - mae: 10.3313 - val\_loss: 210.0999 - val\_mse: 210.0999 - val\_mae: 7.2770 - 163s/epoch - 149ms/step  
Epoch 81/100  
1099/1099 - 162s - loss: 301.7531 - mse: 301.7531 - mae: 10.2625 - val\_loss: 193.3916 - val\_mse: 193.3916 - val\_mae: 6.9705 - 162s/epoch - 148ms/step  
Epoch 82/100  
1099/1099 - 162s - loss: 301.1899 - mse: 301.1899 - mae: 10.2380 - val\_loss: 220.5390 - val\_mse: 220.5390 - val\_mae: 7.8306 - 162s/epoch - 147ms/step  
Epoch 83/100  
1099/1099 - 163s - loss: 301.6656 - mse: 301.6656 - mae: 10.2339 - val\_loss: 217.8443 - val\_mse: 217.8443 - val\_mae: 7.7447 - 163s/epoch - 148ms/step  
Epoch 84/100  
1099/1099 - 163s - loss: 292.0162 - mse: 292.0162 - mae: 10.0737 - val\_loss: 206.6310 - val\_mse: 206.6310 - val\_mae: 7.8267 - 163s/epoch - 148ms/step  
Epoch 85/100  
1099/1099 - 162s - loss: 296.5973 - mse: 296.5973 - mae: 10.1344 - val\_loss: 295.4116 - val\_mse: 295.4116 - val\_mae: 8.6190 - 162s/epoch - 148ms/step  
Epoch 86/100  
1099/1099 - 162s - loss: 294.5459 - mse: 294.5459 - mae: 10.1514 - val\_loss: 243.9530 - val\_mse: 243.9530 - val\_mae: 8.3657 - 162s/epoch - 148ms/step  
Epoch 87/100  
1099/1099 - 163s - loss: 293.2633 - mse: 293.2633 - mae: 10.1024 - val\_loss: 232.5864 - val\_mse: 232.5864 - val\_mae: 7.9549 - 163s/epoch - 148ms/step  
Epoch 88/100  
1099/1099 - 163s - loss: 293.0399 - mse: 293.0399 - mae: 10.0837 - val\_loss: 243.9513 - val\_mse: 243.9513 - val\_mae: 7.6059 - 163s/epoch - 148ms/step  
Epoch 89/100  
1099/1099 - 163s - loss: 294.8976 - mse: 294.8976 - mae: 10.1217 - val\_loss: 273.6815 - val\_mse: 273.6815 - val\_mae: 8.2397 - 163s/epoch - 148ms/step  
Epoch 90/100  
1099/1099 - 161s - loss: 289.2290 - mse: 289.2290 - mae: 9.9983 - val\_loss: 206.5915 - val\_mse: 206.5915 - val\_mae: 7.1093 - 161s/epoch - 146ms/step  
Epoch 91/100  
1099/1099 - 163s - loss: 291.2237 - mse: 291.2237 - mae: 10.0473 - val\_loss: 211.4569 - val\_mse: 211.4569 - val\_mae: 7.1098 - 163s/epoch - 148ms/step  
Epoch 92/100  
1099/1099 - 163s - loss: 286.7278 - mse: 286.7278 - mae: 9.9727 - val\_loss:

s: 219.7345 - val\_mse: 219.7345 - val\_mae: 7.1217 - 163s/epoch - 148ms/step  
 Epoch 93/100  
 1099/1099 - 161s - loss: 286.0133 - mse: 286.0133 - mae: 9.9376 - val\_loss: 245.8259 - val\_mse: 245.8259 - val\_mae: 7.6816 - 161s/epoch - 147ms/step  
 Epoch 94/100  
 1099/1099 - 162s - loss: 292.0183 - mse: 292.0183 - mae: 10.0647 - val\_loss: 228.0164 - val\_mse: 228.0164 - val\_mae: 7.3312 - 162s/epoch - 148ms/step  
 Epoch 95/100  
 1099/1099 - 163s - loss: 288.5802 - mse: 288.5802 - mae: 9.9940 - val\_loss: 239.7849 - val\_mse: 239.7849 - val\_mae: 7.3836 - 163s/epoch - 148ms/step  
 Epoch 96/100  
 1099/1099 - 163s - loss: 291.3874 - mse: 291.3874 - mae: 10.0370 - val\_loss: 245.7693 - val\_mse: 245.7693 - val\_mae: 7.3653 - 163s/epoch - 148ms/step  
 Epoch 97/100  
 1099/1099 - 163s - loss: 290.6483 - mse: 290.6483 - mae: 10.0127 - val\_loss: 193.7924 - val\_mse: 193.7924 - val\_mae: 6.9226 - 163s/epoch - 149ms/step  
 Epoch 98/100  
 1099/1099 - 163s - loss: 285.7290 - mse: 285.7290 - mae: 9.9496 - val\_loss: 205.3830 - val\_mse: 205.3830 - val\_mae: 6.8717 - 163s/epoch - 148ms/step  
 Epoch 99/100  
 1099/1099 - 163s - loss: 287.6687 - mse: 287.6687 - mae: 9.9724 - val\_loss: 231.0277 - val\_mse: 231.0277 - val\_mae: 7.4105 - 163s/epoch - 148ms/step  
 Epoch 100/100  
 1099/1099 - 163s - loss: 283.2629 - mse: 283.2629 - mae: 9.8807 - val\_loss: 189.5630 - val\_mse: 189.5630 - val\_mae: 7.1643 - 163s/epoch - 148ms/step

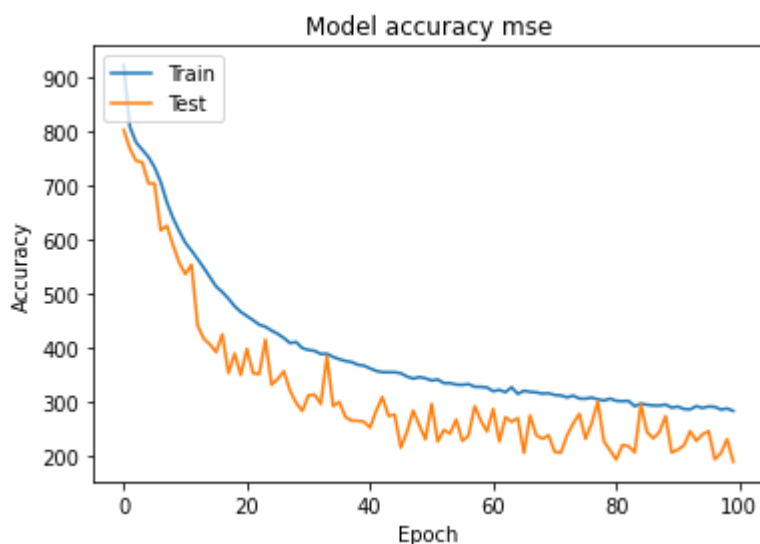

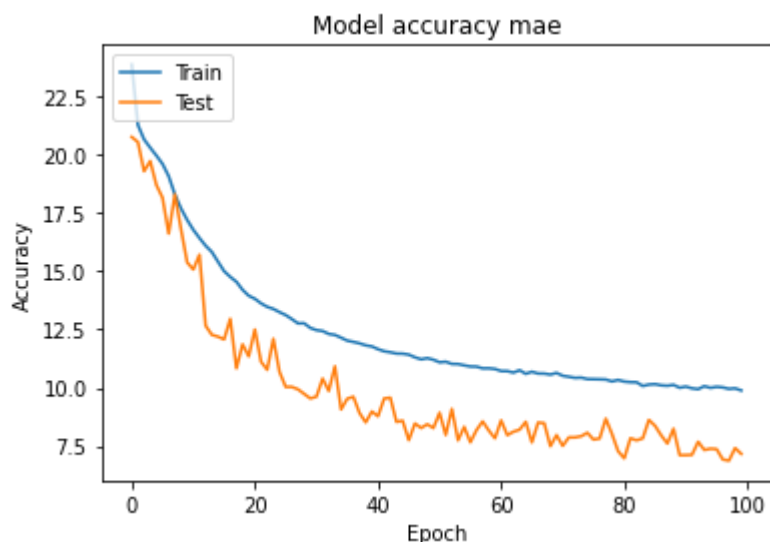

MUSIC MSE: 75.57618

MUSIC MAE: 5.145462

Out of range MUSIC prediction: 211

Music example prediction for MUSIC nan

Actual: [ -55.0 23.0 ]

Prediction: [-23.984808 29.892437]

In [ ]:

```
comparison = MUSIC_metrics(data_split[5])
out_of_music_range = []
out_of_range_prediction = []
index = comparison[2][0]
comparison = MUSIC_metrics(data_split[5])

print("Out of range MUSIC prediction: ", len(comparison[2]))
predictions = model.predict([x_test_magnitude, x_test_phase])

for index in comparison[2]:
    out_of_music_range.append(data_split[5][index][0:2])
    out_of_range_prediction.append(predictions[index])

print("MAE predicted MUSIC nan: ", mean_absolute_error(out_of_music_range, out_of_range_prediction))
print("MAE predicted MUSIC nan: ", mean_squared_error(out_of_music_range, out_of_range_prediction))
```

Out of range MUSIC prediction: 211

MAE predicted MUSIC nan: 12.45418

MAE predicted MUSIC nan: 407.9396

## Unit tests

Test load data method returns the expected data shape

In [16]:

```
from random import randint
mock_data = []
mock_output = [[1,1,1,1],[2,2,2,2],[3,3,3,3],[4,4,4,4]]

for i in range(400):
    mock_data.append([])
    for j in range(4):
        mock_data[i].append(randint(0,4))

x = load_data(np.asarray(mock_data), np.asarray(mock_data), mock_output, 2)
assert x[0].shape == (4, 400)
assert x[1].shape == (4, 400)
assert x[2].shape == (4, 4)
assert len(x) == 3

mock_data = []
mock_output = [[1,1,1,1],[2,2,2,2],[3,3,3,3],[4,4,4,4], [5,5,5,5]]

for i in range(500):
    mock_data.append([])
    for j in range(64):
        mock_data[i].append(randint(0,4))

y = load_data(np.asarray(mock_data), np.asarray(mock_data), mock_output, 8)
assert y[0].shape == (5, 6400)
assert y[1].shape == (5, 6400)
assert y[2].shape == (5, 4)
assert len(y) == 3
```

Test load data method CNN returns the expected data shape

In [17]:

```
from random import randint
mock_data = []
mock_output = [[1,1,1,1],[2,2,2,2],[3,3,3,3],[4,4,4,4]]

for i in range(400):
    mock_data.append([])
    for j in range(4):
        mock_data[i].append(randint(0,4))

x = load_data_cnn(np.asarray(mock_data), np.asarray(mock_data), mock_output, 2)
assert x[0].shape == (4, 100, 4)
assert x[1].shape == (4, 100, 4)
assert x[2].shape == (4, 4)
assert len(x) == 3

mock_data = []
mock_output = [[1,1,1,1],[2,2,2,2],[3,3,3,3],[4,4,4,4], [5,5,5,5]]

for i in range(500):
    mock_data.append([])
    for j in range(64):
        mock_data[i].append(randint(0,4))

y = load_data_cnn(np.asarray(mock_data), np.asarray(mock_data), mock_output, 8)
assert y[0].shape == (5, 100, 64)
assert y[1].shape == (5, 100, 64)
assert y[2].shape == (5, 4)
assert len(y) == 3
```

Test dimensionality reduction returns expected data size and shape

In [19]:

```

mock_data = []
for i in range(100):
    mock_data.append([])
    for j in range(40):
        mock_data[i].append(randint(0,4))

mock_data = np.asarray(mock_data)

assert mock_data.shape == (100,40)
x = perform_dimensionality_reduction(mock_data, mock_data)
assert len(x) == 2
assert x[0].shape == (100, 4)
assert x[1].shape == (100, 4)

mock_data2 = []

for i in range(100):
    mock_data2.append([])
    for j in range(640):
        mock_data2[i].append(randint(0,4))

mock_data2 = np.asarray(mock_data2)

assert mock_data2.shape == (100,640)
y = perform_dimensionality_reduction(mock_data2, mock_data2)
assert len(y) == 2
assert y[0].shape == (100, 64)
assert y[1].shape == (100, 64)

```

Test data sets are split into correct sizes for test and train

In [20]:

```

mock_data = []
mock_data_outputs = [[0,0,0,0],[0,0,0,0],[0,0,0,0],[0,0,0,0],[0,0,0,0],[0,0,0,0],[0,0,
0,0],[0,0,0,0],[0,0,0,0],[0,0,0,0]]
for i in range(10):
    mock_data.append([])
    for j in range(40):
        mock_data[i].append(randint(0,4))

mock_data = np.asarray(mock_data)

x = split_test_train(mock_data, mock_data, mock_data_outputs, 0.4)
assert len(x) == 6
assert x[0].shape == (6,40)
assert x[1].shape == (4,40)
assert x[2].shape == (6,40)
assert x[3].shape == (4,40)
assert len(x[4]) == 6
assert len(x[5]) == 4

```

Test MLP is created as expected from generate MLP method



In [21]:

```

layers = (200,10)
shape = (40,)
inputA = Input(shape=(40,))
inputB = Input(shape=(40,))

x = Dense(200, activation="relu")(inputA)
x = Dropout(0.3)(x)
x = Dense(10, activation="relu")(x)
x = Dropout(0.3)(x)
magnitude_test = Model(inputs=inputA, outputs=x)
magnitude = create_mlp(shape, layers, False, "relu")

assert magnitude.layers[1].weights[0].shape == magnitude_test.layers[1].weights[0].shape
assert magnitude.layers[3].weights[0].shape == magnitude_test.layers[3].weights[0].shape
assert len(magnitude.layers) == len(magnitude_test.layers)

y = Dense(200, activation="relu")(inputB)
y = Dropout(0.3)(y)
y = Dense(10, activation="relu")(y)
y = Dropout(0.3)(y)
phase_test = Model(inputs=inputB, outputs=y)
phase = create_mlp(shape, layers, False, "relu")

assert phase.layers[1].weights[0].shape == phase_test.layers[1].weights[0].shape
assert phase.layers[3].weights[0].shape == phase_test.layers[3].weights[0].shape
assert len(phase.layers) == len(phase_test.layers)

combined = concatenate([magnitude.output, phase.output])
z = Dense(10, activation="relu")(combined)
z = Dense(2, activation="linear")(z)
model_test = Model(inputs=[magnitude.input, phase.input], outputs=z)
model = combine_models(phase, magnitude, (10,))

assert model.layers[2].weights[0].shape == model_test.layers[2].weights[0].shape
assert model.layers[3].weights[0].shape == model_test.layers[3].weights[0].shape
assert model.layers[6].weights[0].shape == model_test.layers[6].weights[0].shape
assert model.layers[7].weights[0].shape == model_test.layers[7].weights[0].shape
assert model.layers[11].weights[0].shape == model_test.layers[11].weights[0].shape
assert model.layers[12].weights[0].shape == model_test.layers[12].weights[0].shape
assert len(model.layers) == len(model_test.layers)

```

Test CNN is created as expected from generate CNN method

In [22]:

```

shape=(40,1)
filters=(64,64)
layers=(100, )
inputA = Input(shape=(40,1))
inputB = Input(shape=(40,1))

x = Conv1D(filters=64, kernel_size=3, activation='relu')(inputA)
x = Conv1D(filters=64, kernel_size=3, activation='relu')(x)
x = Dropout(0.5)(x)
x = MaxPooling1D(pool_size=2)(x)
x = Flatten()(x)
x = Dense(100, activation="relu")(x)
magnitude_test = Model(inputs=inputA, outputs=x)
magnitude = create_1d_cnn(shape, False, filters, layers, 'relu')

assert magnitude.layers[1].weights[0].shape == magnitude_test.layers[1].weights[0].shape
assert magnitude.layers[2].weights[0].shape == magnitude_test.layers[2].weights[0].shape
assert magnitude.layers[6].weights[0].shape == magnitude_test.layers[6].weights[0].shape
assert len(magnitude.layers) == len(magnitude_test.layers)

y = Conv1D(filters=64, kernel_size=3, activation='relu')(inputB)
y = Conv1D(filters=64, kernel_size=3, activation='relu')(y)
y = Dropout(0.5)(y)
y = MaxPooling1D(pool_size=2)(y)
y = Flatten()(y)
y = Dense(100, activation="relu")(y)
phase_test = Model(inputs=inputB, outputs=y)
phase = create_1d_cnn(shape, False, filters, layers, 'relu')

assert phase.layers[1].weights[0].shape == phase_test.layers[1].weights[0].shape
assert phase.layers[2].weights[0].shape == phase_test.layers[2].weights[0].shape
assert phase.layers[6].weights[0].shape == phase_test.layers[6].weights[0].shape
assert len(phase.layers) == len(phase_test.layers)

combined = concatenate([magnitude.output, phase.output])
z = Dense(10, activation="relu")(combined)
z = Dense(2, activation="linear")(z)
model_test = Model(inputs=[magnitude.input, phase.input], outputs=z)
model = combine_models(phase, magnitude, (10,))

assert model.layers[2].weights[0].shape == model_test.layers[2].weights[0].shape
assert model.layers[3].weights[0].shape == model_test.layers[3].weights[0].shape
assert model.layers[4].weights[0].shape == model_test.layers[4].weights[0].shape
assert model.layers[5].weights[0].shape == model_test.layers[5].weights[0].shape
assert model.layers[12].weights[0].shape == model_test.layers[12].weights[0].shape
assert model.layers[13].weights[0].shape == model_test.layers[13].weights[0].shape
assert model.layers[15].weights[0].shape == model_test.layers[15].weights[0].shape
assert model.layers[16].weights[0].shape == model_test.layers[16].weights[0].shape
assert len(model.layers) == len(model_test.layers)

```

Test metrics returned as expected

In [23]:

```
mock_output = np.asarray([[1,1,2,2],[2,2,3,3],[3,3,4,4], [5,5, math.nan, math.nan]])
mock_outut_cleaned = np.asarray([[1,1,2,2],[2,2,3,3],[3,3,4,4]])
x = MUSIC_metrics(mock_output)

assert len(x) == 3
assert x[0] == mean_absolute_error(mock_outut_cleaned[:,0:2], mock_outut_cleaned[:,2:4])
assert x[1] == mean_squared_error(mock_outut_cleaned[:,0:2], mock_outut_cleaned[:,2:4])
assert x[2] == [3]
```
